# Supplementary material for: Data-driven design and screening of novel Klebsiella pneumoniae carbapenemase-2 β-lactamase inhibitors using a generative CLM
Source: Royal Society of Chemistry journal article supplement (doi:10.1039/d6ra02379g), 2026-05-26
Supplement: d6ra02379g1.pdf [file d6ra02379g1.pdf]

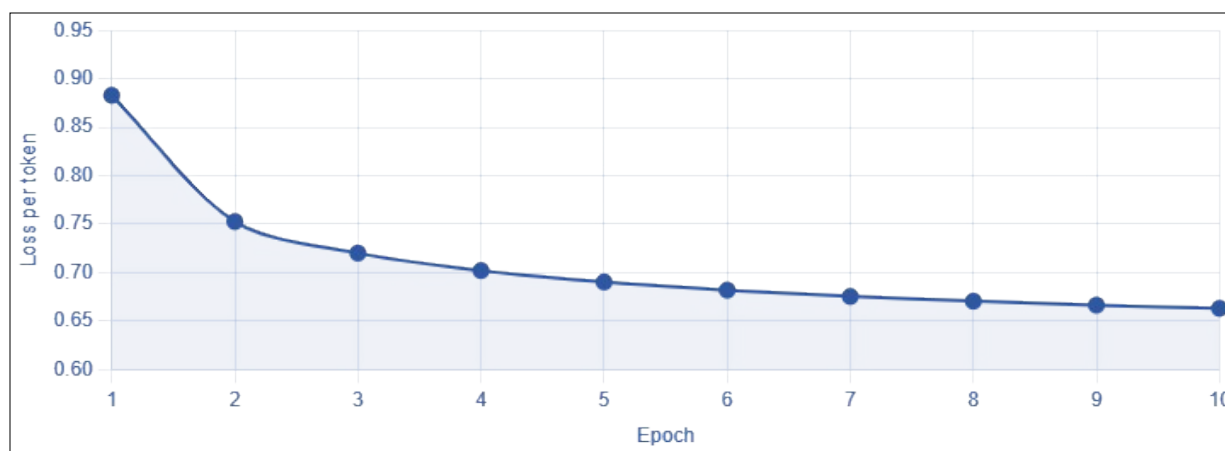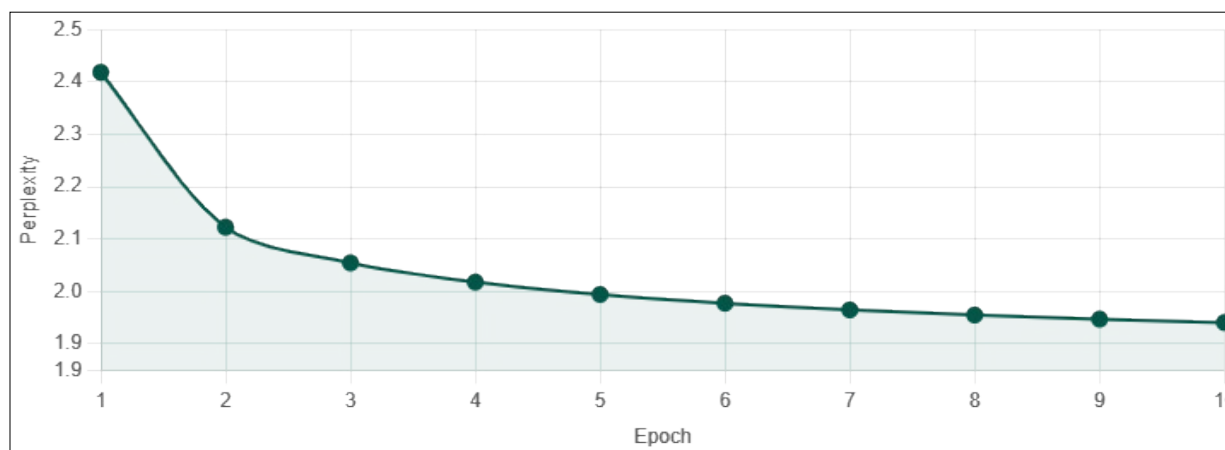

**Figure S1:** Training loss and perplexity curves across all 10 epochs, demonstrating smooth and consistent convergence without plateau or divergence. The gradual decrease in training loss from 0.883 at epoch 1 to 0.663 at epoch 10, alongside perplexity reduction from 2.42 to 1.94, shows stable model learning.
