# Supplementary material for: Data-driven design and screening of novel Klebsiella pneumoniae carbapenemase-2 β-lactamase inhibitors using a generative CLM
Source: RSC Adv. 2026 May 26;16(31):28845–56. doi: 10.1039/d6ra02379g (PMC13213580; doi:10.1039/d6ra02379g)
Supplement: RA-016-D6RA02379G-s003 [file RA-016-D6RA02379G-s003.xlsx]

## Sheet: Sheet1
SMILES	valid	MW	LogP	HBD	HBA	RotBonds	TPSA	QED	PAINS	LipinskiViolations	DrugLike	SA_Score
CN(CCOCCOC1=NO[N+1]([O-1])=C1S(=O)(=O)C2=CC=CC)C2C(=O)C3=CC=CC=C3	True	449.49	1.13	0	9	3	125.88	0.501	No	0	Yes	4.61
C123C(=O)OC[C@]1(OC)[C@@H1]O[C@H1]2C[C@@]4C5CC(=C4C)[C@@H1](C(=O)[O-1])[C@H1]35	True	317.32	-0.21	0	6	2	84.89	0.655	No	0	Yes	7.15
C1N(C2CC23)[C@H1]CC[C@H1]13	True	122.19	1.26	0	1	0	3.24	0.467	No	0	Yes	5.78
C1N(C)C(=O)C2=CC(CN(C)S(=O)(=O)CC3CC3)=NC=C2CN1C	True	352.46	0.73	0	5	5	73.82	0.781	No	0	Yes	3.1
CC(C[C@H1](O)CCCCCC(O)C1CSCCSSC1C)CC(=O)C(C)C	True	436.75	5.43	2	6	12	57.53	0.314	No	1	No	4.7
C1C(=C2C3=CC=C(Cl)C=C3C(=O)O2)CC[C@@H1]1C4=CC=CC=C4	True	310.78	5.19	0	2	1	26.3	0.678	No	1	No	2.97
C[C@H1](NS(=O)(=O)CCC(F)(F)F)CC	True	233.25	1.66	1	2	5	46.17	0.785	No	0	Yes	2.96
C1N(C2=CC=C(S(C)(=O)=O)C=C2)CC1	True	211.29	1.3	0	3	2	37.38	0.74	No	0	Yes	1.61
O1C[C@H1]CN(C2CC=CC3=CC=CC=C32)C(=O)N1	True	243.29	2.31	1	2	1	41.57	0.822	No	0	Yes	4.03
C1OC2=CC=CC=C2[C@H1](C)C1C	True	162.23	2.82	0	1	0	9.23	0.57	No	0	Yes	2.96
C1[C@H1]O[C@@H1][C@@H1](O)[C@H1](O[C@H1]2[C@H1](O)[C@@H1](O)[C@H1](O[C@H1]3O[C@H1](CO)[C@H1](O)[C@H1](O)[C@H1]3O)[C@H1]O)[C@H1]2O[C@@H1](O)[C@H1](O)[C@H1]OC(=O)/C=C/C=C/[C@@H1]1	True	621.57	-4.61	10	17	7	274.75	0.12	No	3	No	6.89
CN(CC(=O)N(CCOC(C)CC)C(C)=O)CCCS(=O)(=O)CC[N+1](C)(C)C	True	422.61	0.62	0	6	14	83.99	0.382	No	0	Yes	3.71
C=1N(C)C=NC=C(C(F)(F)C2=CC=CC=C2CC)NN=C=1	True	290.32	2.84	1	4	3	39.99	0.93	No	0	Yes	4.54
C123OC=NC=NC(OC4CCN(C(=O)OCC5=CC=CC=C5)CC4)C=C1CC[C@H1]2OC/C=C/C6=NC=CC3=C6	True	528.61	4.64	0	8	4	94.84	0.537	No	1	No	6.36
C1OCC=C(C)C(C)=C(OC(=O)C2=CC=CO2)C1=O	True	262.26	2.26	0	5	2	65.74	0.765	No	0	Yes	3.11
O/N=C1\CCCC12CCCCC2	True	167.25	2.95	1	2	0	32.59	0.436	No	0	Yes	3.36
N12C(=O)C=CC(I)=C(O[C@@H1]3O[C@H1](CO)[C@@H1](O)[C@H1](O)[C@@H1]3O)C(CC=C(OC1)C=CCOC)=[N+1]([O-1])C2=C	True	606.37	-0.27	4	10	6	164.22	0.18	No	1	No	6.49
C1C(C(=O)NCCCC(=O)C[C@H1](C)CC1)OC(C)=O	True	269.34	1.59	1	4	1	72.47	0.734	No	0	Yes	3.72
CC(CO[C@H1]C1[C@H1](C(=O)N(C)C)N(C2=CC=CC=C2)C[C@H1]1C=O)OC(C)CN(CCC3=CC=NC=C3)CC(=O)NC4CCCCC4	True	634.84	3.76	1	8	17	104.31	0.263	No	1	No	4.74
O1[C@@]CC2[C@@H1](OC(C3=CC=CC=C3)C4=CC=CC=C4)OC(=O)C=C(O5)[C@]2(O5)[C@H1]1CN(CC=CC6=CC(Cl)=C(Cl)C=C6[N+1](=O)[O-1])C(C)O	True	681.53	6.27	1	10	11	129.83	0.081	No	2	No	5.71
CN(CCNCN=C1[NH1]N=C(CN)S1C)C(=O)O	True	276.37	-0.99	5	5	6	115.34	0.315	No	0	Yes	5.05
C12C[C@@H1](O)CCCCC[C@H1][C@@H1]CC3[C@H1]([C@@]1(C)CCCCCCCNCC3O)[C@](C)(CC(=O)[C@H1](O)[C@](C)(O)CCCCCCCCCCCCC)COC(=O)C4=CC=CC(=C4C(=O)O)CC=C2	True	922.34	11.11	6	9	17	173.62	0.05	No	3	No	7.5
OC=CC=CC(C[C@H1](NC(=O)C(C)(C)NC(=O)CN(CCOC(CS1C2=CC=CC=C2)COCC)OC(CCCCCCCCCCCCCC)C(=O)OCC3=C)C=CC=C3OC4=C)C=C(OC)C(OC5)=C4C=C1CC(=C5OCOC=CCO)C	True	1200.59	12.15	5	15	25	202.04	0.015	No	3	No	7.62
C1[C@@H1]2OC3=C(O)C=CC=C3[C@@]21C	True	162.19	1.81	1	2	0	29.46	0.63	No	0	Yes	3.68
COC1=CC=CC=C1C(=O)OCC/C2=C\CCCCCC(=O)NC=CC=C2[C@H1](O)CC3=CC=C(O)C=C3[C@@](C)C(CC=C(C)C)=CC(=O)[C@]	True	665.83	7.38	3	7	13	122.16	0.116	No	2	No	4.89
C12O/N=C\C=C\C[C@H1]C(=C)[C@@](Br)=C(Cl)C(=O)O[C@@]1OC2=O	True	374.57	2.51	0	6	0	74.19	0.609	No	0	Yes	5.48
C1OC2=CC(NC3=CC=C(OC)C=C3)=CC=C2[C@H1]1C	True	255.32	3.93	1	3	3	30.49	0.901	No	0	Yes	2.46
C1N(CCCCC2=CC=CC=C2Br)CCC=CC(C)=C3C(=O)C=C(C)C13	True	414.39	5.5	0	2	5	20.31	0.594	No	1	No	3.78
OC/C=C\C=C\C(O)C=1C=NOC=1C	True	195.22	1.12	2	4	4	66.49	0.706	No	0	Yes	4.11
O1[C@H1]CC2[C@H1][C@@H1]3CCC4=CC(=O)CC[C@]4(C)[C@H1]3CC[C@]12C	True	286.42	4.26	0	2	0	26.3	0.665	No	0	Yes	4.9
CC(=O)C1=C(O)C=C(O/C(C)=C1)C[C@@](O)[C@@H1](C)C2[C@H1](O)C[C@](O)O2	True	338.36	2.15	4	7	5	116.45	0.607	No	0	Yes	5.19
CS(=O)(=O)C1=CC(CC2=CC=C(O)C=C2O)=CC=C1O	True	294.33	1.8	3	5	3	94.83	0.802	No	0	Yes	2.28
CN(C1=CC=C2C=CC=CC2=C1Cl)C(=O)CCC3=CC=CC=C3	True	323.82	5.09	0	1	4	20.31	0.655	No	1	No	1.97
CC(=O)OC1=CC(OC)=CC=C1C(C(C)(C)C(=O)O)=CC(=O)C2=CC=C(O)C=C2	True	398.41	3.7	2	6	7	110.13	0.317	No	0	Yes	2.62
C1C(=O)NCC=2C3=C(N1N=2)C(=O)C4=CC=CC=C4C3=O	True	267.24	0.29	1	5	0	81.06	0.634	Yes	0	Yes	3.63
CN(C1COC(C2=CC=C(F)C=C2)[C@H1]1CC)O[C@H1](O)C[C@@H1](C)C(=O)C[C@H1](O)C/C=C(\C)[C@@H1]3C=C(C=O)C[C@@H1]3O	True	547.66	3.66	3	8	14	116.53	0.14	No	1	No	5.5
C1=NCC=CC=C1C2=CC=CC(S(=O)(=O)NC(=O)C3=CC=C(Cl)C=C3)=C2Cl	True	421.31	4.14	1	4	4	75.6	0.807	No	0	Yes	2.9
CN1N=C(CC2=CC=CC=C2)N=C1C3=CC=CC=C3	True	249.32	3.07	0	3	3	30.71	0.714	No	0	Yes	1.85
CCC(=O)NC1=C2C3=C(C=CC=C3OC2=O)[C@H1](OC(C)=O)[C@@H1](O)C1	True	331.32	1.21	2	6	3	101.93	0.638	No	0	Yes	3.84
O1C=NC=C1C2=C(F)C=C(F)C=C2NCCC=CN(CCF)C3=CC=CC=C3	True	387.41	5.41	1	4	9	41.3	0.499	No	1	No	3.24
O1CSC(Cl)CC1=O	True	152.6	1.19	0	3	0	26.3	0.385	No	0	Yes	4.66
C1OC=CC2=C([C@](C)(O)C(C)COC(N)=O)C=C12	True	251.28	1.25	2	4	4	81.78	0.787	No	0	Yes	4.63
O1C2=CC=CC=C2[C@H1]1N=CC3=CC(C4=CC=CC=C4)=CC=C3	True	285.35	4.86	0	2	3	21.59	0.629	No	0	Yes	2.79
C1OC2=CC(N)=C(F)C=C2C1=O	True	167.14	0.98	1	3	0	52.32	0.586	No	0	Yes	2.49
C1COC=C2C(CC=NCCCCCCO)=C(C(=O)O)C2=NC1=O	True	334.37	1.67	2	5	9	108.55	0.492	No	0	Yes	3.75
CN(CN1CCN(C(=O)C2=CC=C(Cl)C=C2)CC1C(=O)NCC=O)OCCCCC	True	438.96	1.79	1	6	11	82.19	0.322	No	0	Yes	3.32
CN(CC1=CC=C(CC(=O)O)C=C1C)C(=O)NC2CC3(C=CC4=CC=CC=C43)CC2	True	404.51	4.28	2	2	5	69.64	0.781	No	0	Yes	3.95
C[C@@H1](NC(=O)CCCCOC(=O)C(C(=O)OC1=NC2=CC=CC=C2CC1=O)SC(=O)CC)C	True	476.55	2.66	1	9	10	128.2	0.31	No	0	Yes	3.67
CC(CCOC(=O)CCCC)[C@@H1](OC(=O)C(C)C)[C@H1](C)CCCC1=CC=CC=C1	True	404.59	5.97	0	4	14	52.6	0.358	No	1	No	3.34
C1OC=CC(=O)C(CO[C@H1]2O[C@H1](CO)[C@@H1](O)[C@H1](O)[C@H1]2)OC1O	True	319.29	-2.54	4	9	4	134.91	0.442	No	0	Yes	5.33
COC1=CC=CC=C1C(=O)[C@@H1]CC2C(=O)NC(C)(C)C(=O)C3=CC=CC=C3O[C@@H1]2C	True	408.47	3.65	1	5	5	81.7	0.764	No	0	Yes	4.1
C123OC4=CC(OC)=C(Cl)C=C4C[C@@H1](C(=O)C5=CC=C(CO)N=N5)OC(=O)[C@@H1]C[C@H1](O)C[C@@H1](C1)N(CC2C)C3	True	545.01	2.17	2	10	4	131.31	0.436	No	1	No	6.7
C1[C@H1]C=C[C@H1]2[C@@H1]C3[C@H1](F)C(C)=C[C@@H1](O)CC[C@]2C[C@@]C4[C@@]31CCN4CCCCCCC	True	426.64	6.12	1	2	6	23.47	0.409	No	1	No	7.47
C1[C@H1]C2NC(=N)C[C@@]21N	True	124.17	-0.37	3	2	0	61.9	0.412	No	0	Yes	5.78
CN(CC1=CC=C(/C=C/C(=O)O)C=C1)C2CCCN(CCOC3=CC=C(Cl)C=C3)CC2	True	442.99	4.8	1	4	9	53.01	0.565	No	0	Yes	2.64
C12C(=NO[C@]1(C)[N+1](=O)[O-1])CC3[C@](C)C(C)=C(CC(=O)O)C[C@]3(O)C2=O	True	351.34	1.09	2	7	3	139.33	0.573	No	0	Yes	5.25
C1OC(=O)[C@@H1](CO)NC(=O)[C@@H1](NC(=O)[C@@H1](N)COC)NC(=O)[C@@H1](N)CSSC[C@H1](N)C(=O)NCCCCCCNC1=O	True	638.77	-4.62	9	14	5	279.32	0.101	No	3	No	5.34
CC(CCCCCCC=C(C)COC(=O)C1=CC=CC=C1F)OCCCCCC2CC(=O)OC[C@H1]C3=C[NH1]C=CC=CC(=N3)OC(=O)[C@H1](CC(C)C)NC(=O)[C@H1](CC4=CC=CC=C4)CNCC(=O)N5CCC[C@H1]5[C@H1](C)[C@H1]2O	True	1067.37	9.77	4	12	21	198.48	0.045	No	3	No	7.11
O1[C@@H1][C@H1]OC(=O)[C@@]1(C)[C@@H1]	True	126.11	0.35	0	3	0	35.53	0.439	No	0	Yes	5.62
O1C=CC2=C(NC3=CC=CC=C3)C(O)=C(O)C2=C1C(=O)O	True	285.25	3.24	4	5	3	102.93	0.589	No	0	Yes	2.61
C=C=C/CC=CC(O)=C(O)C(Cl)=C	True	198.65	3.35	2	2	4	40.46	0.413	No	0	Yes	4.37
CN(O)CC(=O)N/N=C/C1=CC=CC=C1[N+1](=O)[O-1]	True	252.23	0.37	2	6	5	108.07	0.447	No	0	Yes	2.52
C1[C@@H1](C[C@@H1](C[C@@H1](OC(=O)C(C)C)C[C@@](C)CC[C@@H1](O)[C@](C)C(=O)CCC)CCC)[C@@H1]2CC(=O)C[C@@H1]12	True	490.73	6.46	1	5	17	80.67	0.237	No	1	No	5.09
C1OC2=CC=CC=C2[C@H1]1NC(=O)CSC3=CC=CC=N3	True	286.36	2.42	1	4	4	51.22	0.877	No	0	Yes	2.62
CC(CC(=O)OCCNC(C1CC1)C=O)OC2=CC=CC3=C2C=CC(NC(=O)CCN)=N3	True	442.52	1.79	3	8	13	132.64	0.243	No	0	Yes	3.66
C1C(=O)NC=CC(Cl)=CC(N2CCN(C)CC2)=NN=C1	True	295.77	0.77	1	5	0	60.3	0.718	No	0	Yes	4.02
C[C@@H1](CCCCC[C@H1](C1)[C@H1]C2C[C@H1][C@@H1]3CCC4=CC(=O)C=C[C@]4(C)[C@H1]3CC[C@@]2(C)[C@H1]1/C=C/C=C(\C)C(=O)C5=CC=CC=C5C(=O)OC6CO[C@@H1]7O[C@@]8(C)CC[C@H1]9[C@H1](C)CC[C@@H1]6[C@@]79OO8)C	True	889.23	12.7	0	8	12	97.36	0.051	No	2	No	7.51
CN(CC1=CC=C(OCC(C)F)C=C1)C(=O)CCCC#N	True	292.35	3.08	0	3	8	53.33	0.692	No	0	Yes	2.74
O1[C@]C2[C@H1]1C[C@@H1](O)[C@@]2(C)[C@H1]3OC=C(C(C)(C)C)[C@]3(O)CO	True	296.36	0.86	3	5	2	79.15	0.704	No	0	Yes	5.81
C1N(C2=CC=C(C(F)(F)F)C=C2)[C@H1]1C3=CC(Cl)=CC(F)=C3	True	315.7	5.06	0	1	2	3.01	0.553	No	1	No	2.71
C1OC2=CC(OC)=CC=C2C1=O	True	164.16	1.27	0	3	1	35.53	0.627	No	0	Yes	2
O1C=C2C=C(O)N=NC2=C1	True	136.11	0.93	1	4	0	59.15	0.585	No	0	Yes	3.68
C1N(CCCC=2C=COC=2CCC)[C@H1]CC[C@]3(C)[C@H1]1CC4[C@@H1][C@@]5(C)CC[C@H1](OC(=O)C6=CC=CO6)C(C)(C)[C@@H1]5CC[C@]43C[C@@H1]	True	601.87	9.41	0	5	9	55.82	0.268	No	2	No	5.58
C1OC2=CC(O)=CC3=C2[C@H1]1O[C@H1]4CO[C@H1]5OCC=C5[C@]4[C@H1](O)[C@](C)[C@H1][C@H1](O)C[C@H1]3OC(=O)C6=CC=CC=C6	True	521.54	2.92	3	9	2	123.91	0.512	No	1	No	5.64
COC1=CC2=CC(F)=C1C[C@H1](C)C(=O)/C=C/C(C)=C/CC[C@@H1]2O	True	318.39	3.91	1	3	1	46.53	0.854	No	0	Yes	4.91
C1CS2C=NC(C3=NN(C)C4=CC=CC=C34)=NN12	True	259.34	1.51	1	5	1	45.78	0.789	No	0	Yes	4.41
CN(CC1C=CC=C(C2=CC=CC=C2)C=C1C=O)O[C@H1]C3=CC=CC=C3C[N@@+1]CCCCCCC(=O)N[C@@H1](CCCCNC(=N)N)C(=O)N4C[C@H1](O)C[C@H1]4C(=O)N[C@@H1](C)C(=O)N[C@@H1](CC5=CC=CS5)C(=O)N[C@@H1](CCCNC(=N)N)C	True	1134.46	3.67	11	12	35	324.38	0.013	No	3	No	6.19
CN(CCC(C)C)[C@@H1](CC(=O)NC(C1=CC=CC=C1)C2=CC=CC(C(N)=O)=C2C)C=O	True	423.56	3.24	2	4	11	92.5	0.543	No	0	Yes	3.42
O1C=CC=C(N2CC3=CC=CC=C3C2)C(F)=C1CC=C4C=C(OS(=O)(=O)O)C(OS(=O)(=O)O)=C4N	True	526.52	2.63	3	9	7	165.69	0.447	No	1	No	4.06
O/N=C1/CCCC1NCC2COC2	True	184.24	0.61	2	4	3	53.85	0.499	No	0	Yes	3.64
C1OC=CC=C(C(=O)OC)CC=CC1=O	True	208.21	1.15	0	4	1	52.6	0.606	No	0	Yes	3.78
OC(=O)/C(=C/NC1=CC=C(Cl)C=C1Cl)C=O	True	260.08	2.57	2	3	4	66.4	0.378	No	0	Yes	2.73
COC=CC=C(C1O[C@H1](C)CC(C)=C1C=O)CC=C	True	262.35	3.34	0	3	6	35.53	0.319	No	0	Yes	4.84
N[C@@H1](C(N)=O)NC[C@@H1](CNC(=O)NC1=CC=C(NC2CCCC2)C[N+1](=O)[O-1])C1O[C@H1](CO)[C@@H1]O	True	484.53	-1.87	8	10	13	227.13	0.082	No	1	No	5.34
C1CCCC(C)C(=O)CCC=C[C@@]2O[C@@H1]3NC(CC4)=CC(=O)C=C[C@]4(C)[C@H1]3C[C@@H1](O)[C@@H1]2C(C)C=C1	True	480.67	5.58	2	5	0	75.63	0.443	No	1	No	6.48
C1N(C)C(=O)COC2=CC(C)=CC=C2C3[C@H1]OC(=O)[C@]3CC=C(C)[C@H1]1	True	340.4	2.76	0	4	0	55.84	0.682	No	0	Yes	4.69
C1OC2=CC=CC=C2[C@H1](C)CNC(=O)[C@H1]3CCCN3C(=O)[C@H1]([C@@H1](C)CC)NC(=O)CSC[C@@H1](C(N)=O)NC(=O)CNC(=O)[C@H1](CC4=CC=C(O)C=C4)NC1=O	True	781.93	0.07	7	10	5	238.36	0.216	No	2	No	5.35
O1C=CC2=C(NC[C@@H1](O)[C@H1](O)[C@H1]OC)C=CC=C1O2	True	266.27	0.29	3	6	6	80.18	0.641	No	0	Yes	6.03
CC(=O)NCC1=NC(C)=CS1	True	170.24	1.09	1	3	2	41.99	0.721	No	0	Yes	2.17
C[C@H1](CC[C@H1]C(=C1)/C=C/[C@H1](O)[C@@H1](C)C(=O)N[C@H1](C(=O)NCCCC)C(=O)O[C@@H1]1[C@@H1](OC(=O)CC(C(=O)O)C2=CC(O)=CC(OC)=C2CC)OC(=O)C[C@H1]OC(=O)NCCCNC3=CC=NN3CC4=CC=CC=C4C)P=O	True	1077.13	5.74	7	18	28	309.34	0.011	No	4	No	6.82
C1C(C[C@H1](OC(=O)CCC(=O)O)C(C)(C)COC)(C)OO1	True	304.34	1.55	1	6	9	91.29	0.51	No	0	Yes	4.07
C=NCC1=CC=C(OC(F)(F)F)C=C1C	True	217.19	3.09	0	2	3	21.59	0.713	No	0	Yes	2.69
C=1OC=CC(NCC[N+1](C)(C)[C@@H1](CCCCC)CC)=C(/C=C/C(=O)O)C=C=1	True	375.53	4.12	2	3	12	58.56	0.233	No	0	Yes	4.73
C12CC(CCCC3=CC=C(OP(=O)(O)O)C=C3)NC=C(C(=O)C4C[C@@]C[C@@H1]41)C[C@@H1](O)[C@](C5)C(=O)C=C[C@@H1]52	True	526.55	3.5	4	6	6	133.16	0.414	No	1	No	6.93
C[C@H1]CN(C1=CC=C(C2=CC=CC=C2)C(=N)N1OCC3=CC=CC=C3)CN=O	True	375.45	4.02	1	6	9	70.68	0.574	No	0	Yes	3.23
O1C=NC=C(C2=CC=C(CN3CCOCC3)C2)N1NC=O	True	290.32	0.35	1	6	5	66.4	0.74	No	0	Yes	4.02
C[C@H1]OC(=O)NCCCC[C@H1]NC(=O)[C@@H1]1CCCN1C(=O)CNCCNC(=O)CNCCNC(=O)CNC(=O)CNCNC(=O)CCNC(=O)NN(C)C(=O)CN(C)C(=O)CNCC(=O)NCCN	True	984.13	-7.29	14	17	35	389.13	0.016	No	3	No	4.83
O1C=C2C=C(NC(=O)OC(C)(C)C)C=CC=C12	True	233.27	3.73	1	3	1	51.47	0.816	No	0	Yes	2.19
CS(=O)(=O)NC(=O)C(Cl)(Cl)Cl	True	240.5	0.43	1	3	1	63.24	0.676	No	0	Yes	2.85
CN(C)C(=O)CNC1=NC=CS1	True	185.25	0.64	1	4	3	45.23	0.751	No	0	Yes	2.4
C1#CC=CC1=O	True	78.07	0.13	0	1	0	17.07	0.297	No	0	Yes	5.24
C1CC/N=C\CC(C2=CC(Cl)=C(Cl)C(O)=C2OC3=CC=CC=C3)C(=O)OCCCC(C(=O)[O-1])OCO1	True	539.39	3.87	1	9	4	126.71	0.581	No	1	No	4.71
CN(CC1=CC=CC(NC(=O)C(C)(C)C)=C1OCO)C(=O)NC2=CC=CC=C2	True	385.46	3.66	3	4	6	90.9	0.662	No	0	Yes	2.4
C=1OC=CC=C(C[C@H1](N)C(=O)OC2=C3C=C(C=C2CC(C)C)CCC3=O)C=CC=C=1	True	405.49	4.33	1	5	6	78.62	0.433	No	0	Yes	5.59
C=[N@+1](CCOC=CC=C(OC)C(OC)=C)CC1=CC=C(OC(C)(C)C)C=C1C([N+1](=O)[O-1])=CC	True	459.56	4.94	0	6	13	83.07	0.079	No	0	Yes	4.19
C1C(C2C=CC=C(C3=CC=CN=C3)O2)C4C=C(Cl)C(=O)[C@@]4(O)[C@@]1(C)O	True	359.81	2.2	2	5	2	79.65	0.846	Yes	0	Yes	4.82
C[C@H1](NS(=O)(=O)C1=CC=C(C(=O)OC)C1)C(C)(C)Cl	True	307.8	1.7	1	4	5	72.47	0.62	No	0	Yes	3.88
C12C=CCC[C@H1](O)C[C@]3(C)[C@@H1](C[C@H1]1C3C)OC[C@](C)(O)CC(=O)N2C	True	351.49	2.12	2	4	0	70	0.656	No	0	Yes	6.35
CC(NC(=O)OCC(C)C)CC1=CC=CC=C1	True	235.33	3	1	2	5	38.33	0.852	No	0	Yes	2.22
C12N(CCC3=CC=C(O)C(OCC)=C3)C(CCC(=O)OC)=C/C2=C\[C@H1]C4=C(C)C(=O)[C@]41C=O	True	450.51	3.08	1	7	9	93.14	0.351	No	0	Yes	4.3
OC1=CC=C(OCC2=CC=CC=C2)C(O)=C1C(=O)OC	True	274.27	2.46	2	5	4	75.99	0.837	No	0	Yes	1.94
CC(O[C@@H1]1O[C@H1](C)C[C@H1](C(C)C)[C@@H1]1)[C@H1](C)O/C=C/CCCC/C=C\CCC[N+1]2=CC=CC=C2	True	457.7	6.81	0	3	15	31.57	0.125	No	1	No	4.97
C1C(C(=O)O[C@H1]2CC[C@](C)C=C(C(=O)[C@H1]C[C@H1]2)C[C@@](O)C(C)(C)[C@@H1]O)C[C@H1]1OC(C)=O	True	433.52	3.78	2	7	7	110.13	0.588	No	0	Yes	5.15
O1C=NC(N)=NC(N(C)S(C)(=O)=O)=N1	True	219.23	-1.48	1	7	1	109.71	0.58	No	0	Yes	4.22
N12S(=O)(=O)C=CC(COC(=O)CC3=CC=CC=C3)=C(C(=O)C(O)C(O)=C1)CC2	True	405.43	0.96	2	7	4	121.21	0.716	No	0	Yes	4.62
CN1C=CC(C[C@@H1](C)NCCCCC2=CC=CC=C2)=NC1=O	True	299.42	2.32	1	4	8	46.92	0.761	No	0	Yes	2.74
C12[C@H1](O[C@@H1]C=C(C(=O)OC)[C@@H1](C)CCCC)[C@@H1][C@@H1](OC(=O)C3=CC=CC=C3)[C@@H1]4[C@](C)(OC(C)=O)C(=O)[C@]41CC2(C)C	True	566.69	5.46	0	8	11	105.2	0.198	No	2	No	5.7
O1C2=CC=CC=C2[C@@H1]1[C@@]CO	True	148.16	1.19	1	2	2	29.46	0.682	No	0	Yes	3.64
CC(C[C@H1](O)CCC(O)CC(C)CO[C@@H1]OC(C)[C@@H1](OC(=O)/C(C)=C)[C@H1]OCC)=O	True	430.54	2.72	2	8	18	111.52	0.194	No	0	Yes	5.11
O1C(=O)C=CC=CC(=O)[C@@]1(O2)C(=O)O2	True	196.11	-0.59	0	6	0	78.9	0.292	No	0	Yes	4.69
C[C@H1](C/C=C\CCCCC1CC=CC(C)(C)O1)CNCCC2=CCCCC2	True	373.63	6.73	1	2	12	21.26	0.302	No	1	No	4.04
C1N(CC=C2[NH1]C3=CC=C(C#N)C=C23)[C@H1]C=C4[C@H1](O[C@H1]O[C@@H1](C5O)[C@@](O)[C@@H1](OC(=O)/C=C6/C=NC7=C(O)C(O)=CC=C76)CO[C@H1]5)O[C@H1]4C(=O)OCC(O)=C1C(C)=O	True	782.72	2.5	6	18	9	259.16	0.121	Yes	3	No	6.76
C123C(=O)[C@@H1][C@H1]CC[C@H1]([C@H1]1C2[C@]3(C)OCC)O	True	222.28	1.16	1	3	2	46.53	0.762	No	0	Yes	5.76
CN(CCCOC1=CC=C(CC)C=C1C(=O)O)[C@H1][C@@H1]2CC34[C@H1]N(C)CC[C@@]3(C(=O)O)[C@H1]2CN(C)CC(=O)NCCC[C@H1](NC(=O)CCCCCCCCCCCCCCC(=O)O)C(=O)C=C[C@](C)(O)C[C@@H1](O)C[C@@H1]4OC(=O)[C@@H1](C)CC=C	True	1150.51	8.01	7	14	30	272.88	0.022	No	4	No	7.54
N1C(=O)[C@@H1](NCC2=CC=CC=C2NC)CC(=O)N(CC3=CC=CC=C3)CC4=CC=CC=C4CCN(CCC)C1=O	True	541.7	4.31	3	5	8	93.78	0.395	No	1	No	3.56
N1[C@@H1]CO[C@H1]1C	True	86.11	0.11	1	2	0	21.26	0.452	No	0	Yes	5.31
C1OC=CC=C(OC=O)C[C@@H1](C(C)C)/C=C/C=C/C=C/[C@H1]1C	True	302.41	4.55	0	3	3	35.53	0.717	No	0	Yes	4.99
O1C=N/C(=C\C=CC=C1O[C@@H1]O[C@H1](CO)[C@@H1](O)[C@H1](O)O)OCC(=O)OC=CC(=O)OC	True	444.37	-1.05	4	13	12	187.24	0.132	No	1	No	4.95
COC(=O)C(OC)OC1=CC(C)=CC(=C1OCOC)OC2=CC=CC=C2N=CC(=O)[O-1]	True	432.41	1.75	0	10	11	124.94	0.296	No	0	Yes	3.71
C1C(CCCCCCN(C)CC2=CC=CC=C2C)(O)OC[C@@H1]O[C@@](OC)=C3C(=O)OC[C@]3O1	True	461.56	3.24	1	8	10	86.69	0.42	No	0	Yes	4.6
C[C@@H1](CNC(=O)C1=CC=C(OC(C)=O)C(OC(C)=O)=C1OCCC)CCC	True	379.45	3.49	1	6	10	90.93	0.494	No	0	Yes	2.88
C12N(C3=CC=CC4=CC=CC=C34)C(=O)[C@@H1]CC5=CC=CC=C5N(CC(=O)NC[C@H1]O[C@@H1](CP(=O)O)O[C@H1]1)OC2	True	550.53	3.02	2	7	3	117.64	0.478	No	1	No	6.2
O1[C@H1][C@@H1]1C[C@](COC(=O)/C=C/C2=CC(O)=CC(O)=C2C(=O)OCOC=O)C[C@@H1](O)C[C@@H1](O)C[C@@H1](O)CC(=O)O	True	554.5	0.19	6	13	18	229.88	0.036	No	3	No	4.83
CN(CCCCCl)CCC1=CC=CC=C1	True	225.76	3.18	0	1	7	3.24	0.509	No	0	Yes	1.83
CC(CC[C@](C)[C@@H1](O1)[C@@H1](Cl)CC[C@@H1][C@]1(C2)CC[C@H1](Cl)[C@]2(C)O)C(=O)O	True	393.35	4.35	2	3	5	66.76	0.682	No	0	Yes	5.83
CC(O)/C(C(=O)OC(C)(C)C)C1=C(O)C=CC2=C1CCC2=O	True	306.36	2.33	2	5	3	83.83	0.837	No	0	Yes	3.54
C=12OC=C(C=1CC2CC)C=O	True	150.18	2.14	0	2	2	30.21	0.604	No	0	Yes	4
COC(=O)[C@@H1](NC(=O)CC1=CC=C(Cl)C=C1)C2=CC=C(C(N)=O)C=C2	True	360.8	2.01	2	4	6	98.49	0.77	No	0	Yes	2.37
C1OC=CC(/C=N/N2C=NC(CC3=CC=CC=C34)=CS2)=NC(C)=NN14	True	352.42	3.14	0	8	0	65.15	0.673	No	0	Yes	5.94
C1[C@H1](CC2[C@H1][C@H1](O)C3[C@@]S4[C@H1]1CC(=O)[C@]4(O)[C@@H1](C)[C@H1]5O[C@@]52C(C)C[C@@H1](OC(=O)/C=C/C6=CC=CC=C6)/N=C(\N)SSCCOP(=O)(O)OC[C@H1]7O[C@@H1]N8C=CC(=O)[NH1]C8=O)[C@H1](O)[C@@H1]7O[C@H1](O)[C@H1]3O	True	1027.1	0.85	9	21	6	324.51	0.048	No	3	No	8.55
CN(CCOCCOCC(OC(N)=O)[C@H1](C)OCCO)CC1CC1	True	348.44	0.22	2	7	15	103.48	0.408	No	0	Yes	3.61
CN(O)C(=O)[C@H1](CC1=CC=CC=C1)N[C@@H1](C)C(=O)N[C@H1]C(=O)N[C@@H1](CO)C(=O)N[C@H1]2CCC[C@@H1]2C(=O)N[C@H1]3CCC[C@@H1]3S(=O)=O	True	651.76	-1.89	8	10	15	223.34	0.06	No	2	No	5.05
C/C(=C\C=1SC2=CC=CC=C2C=1CC)OC(=O)C3=CC(OC)=CC=C3CC(=O)OCC	True	438.55	5.8	0	6	8	61.83	0.329	No	1	No	2.78
C1C(=O)NC=CC=C1NC(=O)[C@@H1]2CCCN2C(=O)[C@@H1](N)C[N+1]=CC3=CC=CC=C3C=C	True	421.5	0.44	3	5	7	118.63	0.554	No	0	Yes	4.35
O1C(=O)/C=C/C=CC=C(NC(=S)NC2=CC=C(Cl)C=C2Cl)C=C1	True	367.26	4.88	2	3	2	54.27	0.741	No	0	Yes	2.57
C=1C(=O)N(CC2=CC=C(OC)C=C2)[C@@H1]CC=C3CN4[C@@H1]C[C@@]3C5CCC(=C[C@@H1]54)/C(=N/C#N)NC(=O)C(CCCC[N+1](C)(C)C)C(O)C(Cl)(Cl)C=1	True	723.75	5.26	2	7	8	118.26	0.164	No	2	No	7.46
OCCNC(=O)C1=CC=CC=C1N2C(=O)C=CC=C(C(=O)N=[C@@H1]CC=CN2O[C@@H1]OP(=O)([O-1])[C@@H1](CO3)O)CC=CC3=CBr	True	679.42	2.11	3	11	4	190.36	0.395	No	2	No	6.47
C1[C@@H1](OCCOCCO[C@@H1]O[C@H1](COS(=O)(=O)[C@@H1](CC2)OC)[C@@H1](OC2O3)[C@H1]CC(=O)O[C@@H1]3/C=C/C[C@H1]4O[C@@H1]4[C@H1](C[N+1]=O)[O-1])CC=C1OC(=O)OCOC(C)(C)O[C@H1]CO	True	867.87	0.48	1	22	24	275.26	0.034	No	2	No	6.61
C#1N(CC=C2C=CC(NC(=O)NC3CCOCC3C(C)=O)=C2)OC#1	True	329.36	1.35	2	5	5	85.5	0.854	No	0	Yes	4.87
C1N(CC2=CC3=NC=C(Cl)C=C3S(=O)(=O)C4=CC=CC=C4C(=O)[C@@H1]C2=C1)C	True	399.88	3.22	0	5	0	67.34	0.68	No	0	Yes	3.95
C=NCC1=CC=CC(=C1)C2C=CC(C)(C)CC2=O	True	241.33	3.53	0	2	3	29.43	0.588	No	0	Yes	3.73
C[C@@H1](NC(=O)[C@H1](CCC(=O)O)NC(=O)[C@H1](CC(C)C)NC(=O)[C@H1](CCC(=O)O)NC(=O)[C@H1](CO)NC(=O)[C@@H1](N1)CC=CC=C(O)C1(NC(=O)/C=C/C=CC=C(N)C(O)=C)C2=CC=C(O)C=C2)C	True	939.03	0.28	14	14	25	368.17	0.036	No	3	No	5.5
FC=CN=COCCCCNCCC(O)(P(=O)(O)O)C(O)C	True	342.3	0.48	5	6	12	131.61	0.151	No	0	Yes	4.78
C1C(NC2=CC=CC(F)=C2)C[C@H1]1C(=O)OC	True	223.25	2.19	1	3	3	38.33	0.798	No	0	Yes	2.02
C1N(C/C(=C\C2=CC=CN=C2)C(C)=C1)CCCNCCCCC3=CC=C(O)C(OC)=C3	True	421.59	4.44	2	5	11	57.62	0.525	No	0	Yes	2.77
C1OC2=CC(O)=CC=C2C1=O	True	150.13	0.97	1	3	0	46.53	0.599	No	0	Yes	2.24
NC(=O)OCC=1N=C(C2=CC=CC=C2)NC(=O)C=1CCCC3(NC(=O)CN(C)CC)C(=O)OC[C@@H1](COS(=O)(=O)O)O3	True	611.63	-0.12	4	12	14	229.54	0.161	No	2	No	4.28
CN(CCC[P+1](C1=CC=CC=C1)(C2=CC=CC=C2)C3=CC=CC=C3CC4)CC=C(O)C=C4	True	442.56	5.25	1	2	2	23.47	0.548	No	1	No	3.88
C1N(CCOCC(F)(F)F)C[C@H1]1C2=CC=C(Cl)C=C2	True	293.72	3.32	0	2	5	12.47	0.772	No	0	Yes	2.19
C=CCC1CCCCCC(=O)C=CC=CC1(C(=O)C2=CC=CO2)OO	True	344.41	4.53	1	5	5	76.74	0.367	No	0	Yes	4.51
C12OC(=O)C3=C(C)C4=C([C@H1](C)CN)CC=C3OCC=CC(=C5C1=CC2=CC=C[C@H1](N6C4)[C@]C[C@@](C)[C@@H1]7[C@@H1]6CC[C@]5(C)[C@]7(C)O)C(C)=O	True	635.83	5.6	2	7	3	102.09	0.39	No	2	No	6.97
CC(CCC1=CC=C2C(=C1)OCO2)OCCCCCC(C)C(=O)O	True	336.43	4.03	1	4	11	64.99	0.618	No	0	Yes	3.05
C123S(=O)(=O)[C@@H1]CC[C@@H1](NC(=O)C(=O)[C@@H1]CC[C@H1](O)/C(C)=C/CC/C=C\[C@@H1]4CC[C@H1](C)OCO4)C[C@]1(C)[C@]2(C)CC[C@@H1]3C	True	605.84	5.17	2	7	11	119	0.19	No	2	No	6.44
CN(CCC1C=C2C=CC3=CC=CN=C3C2=N1)[C@@H1](CC)NC(=O)OCC4=CC=CC=C4	True	416.53	3	1	5	8	66.82	0.574	No	0	Yes	3.87
O1[C@@H1][C@H1]O[C@@]1(C)CC[C@](O2)C=C(C3=CC=CC(O)=C3)OC2=O	True	303.29	3.3	1	6	4	74.22	0.86	No	0	Yes	4.1
O1[C@@H1][C@@H1]CC[C@H1]C[C@@H1](OCCC(=O)OCC2=CC=CC=C2Cl)CC(=O)C(C)(C)C=C1C=O	True	461.96	5	0	6	7	78.9	0.42	No	0	Yes	4.64
C[C@H1](COC(=O)CSC1=NN=NN1CCCC(=O)O)O[N+1](=O)[O-1]	True	349.33	-0.23	1	11	11	159.57	0.243	No	1	No	3.22
C1NC=CC2=C(C=C3N=C(N4CCN(C5CCOCC5)CC4)N=C3N6CCCC6S2)CC1=O	True	468.63	1.93	1	9	1	72.77	0.631	No	0	Yes	4.44
C12N3C4=C[N+1]2=CC=C4C5=C[C@]31OCCCO5	True	215.23	0.79	0	3	0	25.35	0.472	No	0	Yes	6.47
C12N(C(=O)C=3[NH1]C4=CC=C5C=C4C=3C5)[C@H1]C6=CC=CC=C6C=CC[C@@H1][C@@H1]1CC[C@]2(O)[C@@H1][C@@H1](C)C(=O)O	True	481.57	4.78	3	3	4	93.63	0.391	Yes	0	Yes	6.24
C1N(C2CC3=CC=CC=C3C2)C[C@@H1]1C4=CC=C(C#N)C=C4	True	274.37	3.12	0	2	2	27.03	0.841	No	0	Yes	2.23
C1S(=O)(=O)C2=CC=CN=C21	True	155.18	0.37	0	3	0	47.03	0.543	No	0	Yes	3.03
O[C@H1]C1N(CC2=CC=CC=C2CC(=O)ON)C(=O)N1	True	264.26	0.03	3	5	5	104.89	0.651	No	0	Yes	3.64
C#CCSC1=NC(SCC2=CC=C(Cl)C=C2Cl)=NC(C)=C1C3=CC=CN=C3	True	432.4	6.17	0	5	6	38.67	0.202	No	1	No	2.8
CN(CC1=C(Cl)C=CC=C1S(C)(=O)=O)CC=C(C(F)(F)F)NN=NN	True	399.83	2.45	2	5	7	100.15	0.416	Yes	0	Yes	3.46
C=1[C@@](NC(=O)O[C@H1](C)CC2=CC=C(OC)C=C2)C(=O)O[C@@]=1C(=O)NC3CC3	True	373.39	1.6	2	6	7	102.96	0.704	No	0	Yes	3.29
CC(C[C@@H1](C)/C=C/C(=O)NN1C=CC=N1)OC	True	237.3	1.57	1	4	6	56.15	0.764	No	0	Yes	4.04
C123OC=CC4=C([C@H1][C@H1]5C[C@]5(CC)[C@@H1]1)[C@@](C)(O)CCC46CCC6[C@@]2(C)CCC3N7CCC(F)(F)CC7	True	485.66	6.25	1	3	2	32.7	0.502	No	1	No	3.55
CN(C1=CC=CC=C1[C@H1]C[C@H1](OC)N(C)CC)C2CCCCCC2	True	331.52	4.71	0	3	8	15.71	0.507	No	0	Yes	3.44
CC(NC(=O)N[C@@H1](CO)[C@H1]C(=O)N1CCNCC1)C(C)CC(=O)CCC(=O)O	True	399.47	-0.87	5	6	11	148.07	0.303	No	0	Yes	4.13
C12[C@H1](CCC(N)=O)[C@H1](C)C[C@H1]3O[C@@H1](C)[C@@](OC(=O)/C=C/1)O[C@]2(C)O3	True	338.38	1.62	1	6	3	97.08	0.786	No	0	Yes	6.14
C1C(C(=O)NC[C@@H1](C(=O)N(C)[C@H1](C)CC2=CC=CC=C2OC)CNC(=O)OCC(C)(C)C)C1CCC	True	503.68	4.03	2	5	13	96.97	0.424	No	1	No	3.99
NC(=O)[C@@H1](NCC1=CC=C(F)C=C1)C(N)=O	True	225.22	-0.75	3	3	5	98.21	0.575	No	0	Yes	2.14
N1C(=O)CNC(=O)[C@H1](CCCCN)NC(=O)C[C@H1](CCC2=C[NH1]C3=CC=CC=C23)CNC(=O)[C@H1](CC(=O)O)NC(=O)[C@H1]4CCCN4C1=O	True	668.75	-0.37	8	8	9	244.92	0.162	No	2	No	4.86
CC(C)C(=O)NC=CC(C(=O)NCC1=C(C)C=C(C)[NH1]C1)=O	True	305.38	0.78	3	4	6	87.3	0.5	No	0	Yes	3.54
C1C(OC2=CC=CC=C2)C[C@@H1]1C3=CC=CC([N+1](=O)[O-1])=C3	True	269.3	3.92	0	3	4	52.37	0.624	No	0	Yes	1.98
C12NN=C(C3=CC=C(C(F)(F)F)C=C3)C(=O)N1C2	True	255.2	1.18	1	3	1	44.47	0.766	No	0	Yes	3.43
C1N(C(=O)C(NC(=O)C2=CC3=CC=C2)C4=CC=CC(O)=C4C1)OCCCC3	True	366.42	2.52	2	4	0	78.87	0.751	No	0	Yes	4.92
OC1=NC=CC(NS(=O)(=O)C2=CC=CC(C(F)(F)F)=C2)=N1	True	319.26	2	2	5	3	92.18	0.903	No	0	Yes	2.47
C12N(CC=CC=CC1C(=O)OCCOCCOCCN(CC)CC=C)N=C2C	True	391.51	1.87	0	7	13	63.6	0.271	No	0	Yes	4.23
C12N(CCCC(N)OC=CC3=COC=C3CC)C[C@@H1](C1)O[C@@H1]2CC4=CC=CC=C4	True	396.53	3.98	1	5	10	60.86	0.486	No	0	Yes	5.31
C1C(NC(=O)OCC2CC3COC=CC=C(C(C4=CC=C(C5=CC=CC(F)=C5)C=N4)C6=CC=CC=C6)N3C7=C)N=CC=C7N21	True	589.67	5.74	1	7	4	79.29	0.418	No	2	No	5.72
C1[C@@H1](OC(=O)[C@@H1](O)[C@@H1]C)CC=C[C@@H1](C)[C@](C)(OC(C)=O)[C@@H1]1OC(C)=O	True	355.41	1.72	1	7	5	99.13	0.455	No	0	Yes	4.73
ClC1=CC=CC=C1C=2CN=C(O)C=2	True	193.63	2.69	1	1	1	32.59	0.731	No	0	Yes	2.94
O1[C@@]CC2[C@H1]C(C1C[C@]2(O)COC)[C@H1]CC(=CO)C	True	266.34	2.09	2	4	5	58.92	0.748	No	0	Yes	6.65
CS(=O)(=O)[C@@H1](C)C1=CC=CC=C1	True	184.26	1.79	0	2	2	34.14	0.702	No	0	Yes	2.37
O1[C@@H1]CN(COC[C@H1]OCO)C[C@@H1](O)[C@@H1]1O	True	235.24	-1.74	3	7	6	91.62	0.372	No	0	Yes	5.18
O1C(=O)C2=CC=CC(Cl)=C2N1C(=O)C=CC=CC3=CC=C(C=C3O)C=CC=C	True	393.83	5.06	1	5	5	72.44	0.485	No	1	No	3.33
C(S(=O)(=O)C=CC)CF	True	152.19	0.9	0	2	3	34.14	0.602	No	0	Yes	3.76
C12OC=CC=C([C@H1]3OC(=O)C[C@H1]3C[C@@H1](O)[C@@H1]1C4)OCO[C@](C[C@@H1](O)[C@@H1](O)[C@](C)C(O)=C4C=C)(C)C2=O	True	505.54	1.52	4	10	1	151.98	0.386	No	1	No	7.08
C1C(=O)NC2=CC([C@H1]3CC[C@H1](C4=CC=CC(F)=C4)CC3)=CC1N2C	True	326.42	3.7	1	2	2	32.34	0.899	No	0	Yes	4.27
C[C@@H1](CNS(=O)(=O)C1=CC=CC(C(F)(F)F)=C12)CC2	True	293.31	2.57	1	2	0	46.17	0.799	No	0	Yes	3.42
C12[C@@H1](O)[C@H1](OC3=CC=C(SC)C=C3)C(CC=C(C)CC(=O)OC)CC4=CC=C(C)C(=N4)NSC1=C2C	True	526.72	5.96	2	8	7	80.68	0.198	No	2	No	5.96
C1N(C[C@@H1]CC2=CC=C(Cl)C=C2Cl)CC(=O)OCC3=CC=CC=C3C=NC4=CC=CC=C4C(=COC)C=C1	True	548.49	7.09	0	5	5	51.13	0.252	No	2	No	3.94
CC(=O)NC(=S)NC1=CC=CC=C1	True	194.26	1.52	2	2	1	41.13	0.666	No	0	Yes	1.63
O1C[C@H1]C[C@@H1](OCCCCSC2=CC=CC=C2C(=O)O)[C@@]1(O)[C@](C)C(=O)O	True	396.46	2.63	3	6	10	113.29	0.409	No	0	Yes	4.04
C1S(=O)(=O)C=C2C=CC(S[C@@H1](CO)CC(F)(F)F)=C2CC[N@@+1](C)([O-1])CC1	True	413.48	2.89	1	5	4	77.43	0.567	No	0	Yes	5.57
O1C=NC2=C([NH1]C=C2C1=O)CN(C3=CC=C(C(F)(F)F)C=C3)CC(=O)N(CCC4CC4)[C@@H1]C5C=CC=CC(OC6CCCC6)=C5	True	621.68	6.92	1	6	12	91.67	0.236	No	2	No	4.49
C1C(CC(=O)OCCN(C)C(=O)NCCCOCCNC(=O)C2=CC3=C(C=C2C)OCO3)OCOC(=O)[C@]4(C)O[C@@H1]4CCC(C)CO1	True	665.74	1.92	2	12	13	172.72	0.178	No	2	No	4.99
C12=CC(=O)C[C@](C3)[C@@H1]C[C@](C)(C(=O)OC)[C@@H1](C)[C@H1]3[C@@](C)CC[C@H1](O[C@@H1]4OC(CO)[C@@H1](O)[C@H1](O)[C@H1]4NC(=O)CCCNC=O)[C@H1]1[C@@H1]2OC(=O)C5=CC=C(OC)C(OC)=C5O	True	829.92	1.68	6	15	14	245.71	0.089	No	3	No	7.1
C12N(C3)C=CC=C(C(=O)N4[C@@H1]C=C[C@H1]4C(=O)NC5CC5)C=CC=C3[C@H1]1O2	True	350.4	1.17	1	4	3	65.18	0.776	No	0	Yes	6.13
C1N(CCOCC(F)(F)F)C[C@@H1]1C#N	True	208.18	1.02	0	3	4	36.26	0.647	No	0	Yes	2.77
C1[C@]2(OCC(C)(C)C2)[C@@H1](C)[C@H1]CCO[C@H1](C1O)[C@@H1]3O[C@@H1]O[C@]4(C)CC5[C@H1][C@H1](C)CC[C@@H1]([C@H1]3C)[C@@]5OO4	True	506.68	5.19	1	7	1	75.61	0.491	No	2	No	6.49
C12C(=NO[C@@H1]3C[C@H1](O)CC[C@]31C[C@@H1]C)CO[C@H1]4C(C)(C)OC(=O)[C@]42O	True	352.41	0.97	2	7	2	97.58	0.719	No	0	Yes	5.64
CCNC(=O)[C@H1](C=1C=NN(C)C=1N2CCOCC2)NC(=O)OC(C)(C)C	True	367.45	0.96	2	7	5	97.72	0.804	No	0	Yes	3.14
O/N=C/C1=CC=CC=C1Cl	True	155.58	2.15	1	2	1	32.59	0.376	No	0	Yes	2.03
C1[C@@H1]CCC#CC=CC(OC)=C(NC(=O)/C(=C/C2CC3=CC=C(N(CCC)CCCl)C=C3)N=C(CSCC4=CC=C5C(=C4)OCO5)C=CC=C6[NH1]2)C=CS6=N1	True	797.47	7.9	2	9	12	96.78	0.167	Yes	2	No	7.05
CN(CC(=O)NC(C)C)C[C@@H1](CC1=C[NH1]C=N1)C(=O)N2CCC[C@H1]2C(=O)N[C@@H1](CC3=CC=CC=C3)C(N)=O	True	525.65	0.23	4	6	13	153.52	0.294	No	1	No	3.77
C1C(O[C@@H1]2O[C@H1](CO)[C@@H1](O)[C@H1](O)[C@H1]2O)=C\[C@H1](O)[C@H1](C)[C@@H1](O)[C@H1](O)[C@H1]CC3=CC=C4C=C3COC(=O)C=CC=C1[C@]OC5=CC6=CC(=C5O)C6OC7=CC=C(C=C7)C(=O)O[C@@H1]4OC(C)(C)COC(=O)C(C)(C)CO	True	1018.05	2.61	9	20	9	307.12	0.11	No	3	No	7.55
O/N=C\C1C=CC(O)=CC1=O	True	153.14	0.64	2	4	1	69.89	0.33	No	0	Yes	4.42
CN(CCC(=O)OC1=CC=C(C(=O)N[C@H1](C)C(=O)O)C=C1C2=CC=C(O)C=C2)C(N)=O	True	429.43	1.57	4	6	8	159.26	0.366	No	0	Yes	2.84
C123[C@@H1]O[C@H1]CC[C@H1]CC4C=C(C[C@](C)[C@H1]4[C@H1](O)[C@@H1]1OC[C@H1]5O[C@@H1](OCC6=CC=C7C=CC=CC7=C6)C[C@@H1]5OC(=O)CC)OCC[C@H1]2CC=C3	True	670.84	7.36	1	8	8	92.68	0.23	No	2	No	7.8
CN(CC1=CC2=CC(Cl)=CC=C2OC1)OC(=O)C3=CC=CC=C3	True	329.78	3.82	0	4	4	38.77	0.799	No	0	Yes	2.63
O1C=CC=C(O)C1=C/C=C\[C@H1](O)OCCN2CCCCC2	True	293.36	2.23	2	5	6	62.16	0.735	No	0	Yes	3.98
O1[C@H1][C@@H1](O)[C@H1](O)[C@H1][C@H1]1O[C@@H1]O[C@]2(CC)OC[C@]2[C@]3COC(=O)[C@@H1]3C[C@H1]4O[C@]4C5=CC=C(C(I)=C5)OC(=O)NCC6=CC=CC(C)=C6OC	True	777.56	3.62	3	12	13	163.77	0.154	No	2	No	5.97
CN(CC1=CC=C(OC2=CC=CC=C2)C=C1C)C=O	True	255.32	3.38	0	2	5	29.54	0.766	No	0	Yes	2.09
CC(C(=O)N[C@@H1](CCC1=CC=C(F)C=C1)C(=O)N[C@H1](C(=O)NC(N)=O)CC)COC	True	424.47	0.62	4	5	11	139.62	0.412	No	0	Yes	3.31
C[C@H1]NC(=O)[C@H1](CC1=CC=C(O)C=C1)NC(=O)[C@H1](CO)NC(=O)[C@@H1]2CCCN2C(=O)[C@@H1](N)CC3=CC=CC=C3C(N)=O	True	581.65	-1.15	7	8	13	217.18	0.153	No	2	No	3.92
C[C@@H1](CC[C@H1](O)C[C@@H1]C[C@@H1][C@@](C)C1C[C@H1]C(=C[C@@H1]1OC(=O)C)Cl)O[C@H1]O[C@H1]O[C@@H1](C)[C@H1]O	True	472	4.79	2	7	17	94.45	0.232	No	0	Yes	6.04
CCC/CC=C\C/C=C\CCCCCCC(=O)O	True	252.4	5.1	1	1	12	37.3	0.387	No	1	No	2.33
CN1N=C(CCCC(C)=O)CN1C	True	183.25	0.89	0	4	4	35.91	0.649	No	0	Yes	3.49
C=NCC=COC(C1=CC=C(C(=O)O)N=N1)=N	True	234.22	0.73	2	6	5	108.52	0.443	No	0	Yes	3.79
C1C[C@H1]CC2C=C(C3=CC=C(O)C=C3O)O[C@@H1]1C[C@H1](OC(=O)C4=CC=CC=C4Cl)C[C@H1]C(=O)O2	True	484.93	5	2	7	3	102.29	0.591	No	1	No	5.62
C[C@@H1](O[C@@H1]1O[C@H1](CO)[C@H1](O)[C@H1](O)[C@H1]1O[C@@H1]O[C@@H1](O)[C@@H1](O)[C@H1]O[C@@H1])COCO[C@H1]O[C@H1](C[N+1]2=CC=CC=C2)O[C@@H1]/C(O)=C\C=C\[C@H1](O)C3=NC4=CC=CC=C4N=C3CC(=O)[C@@H1]CCCC/C=C/[C@@H1]C=C/C=[N+1][O-1]	True	1007.06	2.27	7	21	36	308.57	0.006	No	3	No	7.33
C1C(=O)NC=CC=C(C(=O)N[C@@H1](C(N)=O)CC)CC(C1=O)=C	True	305.33	-0.16	3	4	4	118.36	0.494	No	0	Yes	4.26
O1C=CC=C(NC(=O)OC(Br)(Br)Cl)C1=O	True	361.37	2.83	1	4	2	68.54	0.823	No	0	Yes	3.06
C=C(OC(=O)CCCCCCCCCC12O[C@H1][C@H1]([C@@H1](O)CC)N=C(N3CC3)[C@@H1](O)[C@@H1]1O)OCOC(=O)[C@H1](O)C(C)(C)[C@@H1](OC(=O)NCCCC)[C@H1](O)C(C)(C)C/C=C(\C)[C@@H1]2OC	True	883.11	4.57	6	16	7	235.14	0.068	No	3	No	7
O1C[C@H1]N2C3=C(CCC2C1=O)COCO[C@@H1](O)[C@@H1]3O	True	270.26	-0.89	2	7	0	88.46	0.552	No	0	Yes	5.01
C1NCCC1CC2CC=NC3=CC=CC(=C32)CN(CCCN4C=CC=CC4=NC5=CC=C6C=C5C7=CC(=CC=C7N6CCC(=O)N[C@@H1]C8=CC=C[NH1]8)N=O)CCN	True	763.97	7.32	4	10	17	148.5	0.073	No	2	No	5.79
C1C(C(C)[C@H1]CC[C@H1]([C@@H1]CC[C@]1(C)ON2)C=C(C3=CC=CC=C3)CO2)O	True	357.49	4.28	2	4	1	50.72	0.788	No	0	Yes	6.22
C12N(C34CC3)[C@H1]CC[C@@]5(CO5)[C@@H1](C1)[C@H1]24	True	190.27	1.56	0	2	0	15.77	0.539	No	0	Yes	6.76
C1OCC(=O)O[C@H1]C[C@@H1](C)[C@@H1]2CC[C@H1]1[C@@H1]2	True	210.27	1.98	0	3	0	35.53	0.573	No	0	Yes	6.18
C12N(C)C(=O)C=CC=C(OCC=CN(OCC)C3=CC=CC=C3)C(OC)=C1O2	True	384.43	3.1	0	6	8	63.77	0.507	No	0	Yes	4.63
FC=CC=CCNCC[C@H1]CN	True	171.24	1.17	2	2	7	38.05	0.445	No	0	Yes	4.21
CCCCCCN(CCCCCCCCC[C@@H1](O)C=1C=CSC=1)CCCCCCCCCCCCCC	True	535.97	11.49	1	3	29	23.47	0.103	No	2	No	2.97
C1OC2=CC=C(CCO/C=C/C=C/C=C/C(C)C(=O)O)[C@@H1]12	True	288.34	3.21	1	3	8	55.76	0.423	No	0	Yes	4.72
CN(CC1=CC=C(OC)C=C1CC)CC(=O)CCC2=CC=CC=C2	True	325.45	3.89	0	3	9	29.54	0.7	No	0	Yes	2.06
O1C[C@H1]CN(C2CCCCC2)C(=O)C[C@H1]1O	True	226.3	1.09	1	3	1	49.77	0.728	No	0	Yes	3.75
C1C(O)CC[C@](C)[C@H1]CC2[C@@]C3[C@]2C[C@H1](C)[C@H1]31	True	231.36	3.28	1	1	0	20.23	0.678	No	0	Yes	6.9
C12NCCC=C([C@@](C(=O)OC)C[C@H1]1CNC(=O)OC3=CC=C(Br)C=C3[C@H1])C(=O)[C@@]C2	True	474.33	2.69	2	6	4	93.73	0.652	No	0	Yes	5.92
C1[C@H1](COC(=O)N[C@@H1](CCC=C(C)C)C(=O)O1)C(=O)OC	True	299.32	1.17	1	6	4	90.93	0.476	No	0	Yes	4.14
C1N(C2=NC=CC2(F)C(F)F)C1	True	176.14	1.2	0	2	1	15.37	0.548	No	0	Yes	4.45
C1C(=O)O[C@@H1][C@@](CO)[C@@H1](OC(=O)C2=CC=CC=C2)[C@](O)OC[C@H1]1	True	320.3	0.97	2	7	3	102.29	0.8	No	0	Yes	4.59
C1NNN(CC(=O)N[C@@H1]C2CCC3=CC=CC=C3[C@@H1]2CC=O)OC4=CC=CC=C41	True	393.47	2.02	3	6	6	82.7	0.652	No	0	Yes	4.4
C[C@H1]1O[C@@H1](OCCCCCCCCCCCCC)C[C@H1](OC)[C@H1](O)[C@@H1]1C(=O)OCCCCCC	True	486.73	6.56	1	6	20	74.22	0.155	No	1	No	3.87
COC(=O)/C=C/[C@H1](OCC1=CC=CC=C1)[C@](O2)C3[C@H1](C[C@@H1](O)C[C@H1]C[C@](C)(C(=O)O)[C@@H1](CCO)[C@]2)C[C@](C)(O)CCC(=O)N[C@H1](CCCCN)C(=O)N[C@@H1](CC(N)=O)C(=O)N[C@H1](CC4=CC=CC=C4)C(=O)N3C	True	1019.2	1.81	9	14	17	319.47	0.062	No	3	No	6.74
O[C@](C12[C@H1]CC[C@H1](O)[C@@]1(C)O2)(C)CCO	True	215.27	0.01	3	4	3	73.22	0.58	No	0	Yes	5.17
O1C[C@H1]2O[C@@](CC[C@@H1][C@@H1]2C3C[C@H1]C(O)=CC3=O)(C[C@H1]1CC)O	True	308.37	2.11	2	5	2	75.99	0.817	No	0	Yes	6.02
CN(CC1=CC=C(CCC(C)C)C=C1)CC(=O)C2=CC=CC=C2	True	309.45	4.59	0	2	8	20.31	0.665	No	0	Yes	1.81
C[C@@H1](C[C@@H1](O)CC/C=C/[C@@H1](C)/CC/C=C)C\CC(=O)O	True	282.42	4.18	2	2	12	57.53	0.528	No	0	Yes	3.79
O[C@@H1][C@@H1]C1C(=O)C[C@H1]C(C2)(C)C(=O)C#C[C@@](C(=O)CCCC3CCCCCCCCCCCCCC(=O)N[C@H1](/C(C)=C/CO/N=C(/N)CC(=O)O)[C@@H1](C)OC4=CC=C(C=C4C)[C@@H1]3)CO[C@@]1(O)[C@]2(C)O	True	959.21	7.49	6	12	13	244.37	0.021	No	4	No	4.64
CCOCCN	True	89.14	-0.02	1	2	3	35.25	0.493	No	0	Yes	2.11
C12N(CC3=CC=CC(Cl)=C31)CO2	True	181.62	2.14	0	2	0	12.47	0.608	No	0	Yes	3.52
OC/C=C\C=C\C=C\[C@@H1](NC(=O)CNC(C)=O)C(=O)O[C@@H1][C@@H1]O[C@](C)CCC[C@H1](O[C@H1]O[C@H1](CO[C@@H1]1O[C@@H1]1C[C@H1](O)[C@@H1](O)CO)[C@H1](O[C@@H1]2O[C@H1](CO)[C@H1](O)[C@H1](O)[C@H1]2O)[C@H1])OC(C)=O	True	904.91	-2.97	10	21	32	340.55	0.011	No	3	No	6.82
C1N[C@H1](C)CN(C(=O)[C@H1](CCC2=CC=CC=C2)NC(=O)[C@@H1](N)CC3=CC=C(NC(=O)OC(C)C)C=C3)C1	True	509.65	2.45	4	6	10	125.79	0.39	No	1	No	3.39
N1O/C(=C\C2=CC=CC(O)=C2Cl)[C@H1](O)[C@@H1](O)C3=CC=CC=C3OC4=CC=CC(=C4)OC=CCOC(=O)CCC(=O)OCCOC(=O)[C@@](O)(CC=O)C1=O	True	756.11	2.96	5	15	3	233.68	0.112	No	2	No	6.19
O[C@H1]1CCCC[C@@H1]1[C@H1](C=O)OC	True	172.22	0.75	1	3	3	46.53	0.639	No	0	Yes	3.9
C1OC2=CC(OC)=CC=C2C1C(=O)NC3CCCCCCC3	True	303.4	3.4	1	3	3	47.56	0.931	No	0	Yes	2.63
C=1OC2=CC(C)=CC=C2[C@H1]=1	True	132.16	2.74	0	1	0	13.14	0.537	No	0	Yes	1.96
C1N(O)C(=O)NC=CC=C(C=CC(C(N)=O)=NC=CC(NC[C@H1](N)CCCl)=CN(CC(=O)NCC(=O)O)C=N)CC=C1	True	606.08	0.28	8	9	16	239.56	0.03	No	2	No	5.56
FC(O)CCC[C@@H1]CCC1=CCCC1	True	199.29	3.54	1	1	7	20.23	0.491	No	0	Yes	3.83
C[C@@H1](C[C@H1](OC1)[C@](C)C(=O)[C@]O[C@@]1(C)CC[C@@H1]2O[C@@]2(C3/C=C/C4=CC=C5C(=C4)OCO5)[C@@H1]OC(=O)/C=C/C=CN(C)C(=O)N[C@@](C)C(=O)OC)[C@@H1]C3C	True	732.83	5.36	1	11	9	151.46	0.151	No	3	No	7.4
CN(C1=CC=C(N2CCC(O)C3C2)C=C1)[C@H1]4C[C@@H1]CN(S(=O)(=O)O)[C@@H1]43	True	366.46	0.77	2	5	1	84.32	0.715	Yes	0	Yes	5.82
C1N(CC2=NN=CN2C)[C@@H1][C@@H1]3CCCN3C1=O	True	234.28	-0.22	0	5	2	54.26	0.71	No	0	Yes	3.95
C1[C@H1](CO[N+1](=O)[O-1])O[C@H1]2[C@@H1](O)[C@H1](O)[C@H1](CO)O[C@H1]2OC1(C)C	True	323.3	-1.41	3	9	4	140.75	0.42	No	0	Yes	4.64
CN(CC1=CC=C(C(F)(F)F)C=C1)C[C@H1](NC(=O)C=C2C=C(C3=CN=C4C=C5N(C4=C3)CCCNC5=O)N=C2)C(=O)O	True	580.57	3.24	3	7	8	128.92	0.351	No	1	No	3.99
CN1N=C(CCNC2=CC(C)=CC(C)=N2)N1	True	219.29	1.41	2	4	4	58.53	0.817	No	0	Yes	2.86
C123OC4=CC(OC)=CC=C4C5=CC=C1O[C@H1]([C@H1](OC(=O)C6=CC=CC=C6)[C@H1]5[C@H1]2C(=O)O)COC7(O3)CO[C@@H1]CCC7C	True	575.59	4.36	1	9	4	118.98	0.527	No	1	No	6.99
CN(CC1=CC=CC(C2=CC=CC=C2)=C1)C(=O)N3C=CC4=C(C=CC=C4O)C3=O	True	384.44	4.47	1	4	3	62.54	0.567	No	0	Yes	2.32
O1[C@@H1]O[C@H1][C@@H1](O)[C@H1]2C[C@@H1](O)[C@@H1]1O[C@H1]2/C=C/C=C(\C)C[C@@H1](/C=C(\C)C(=O)[O-1])[C@@H1](C)CC	True	421.51	2.02	2	7	8	108.28	0.456	No	0	Yes	7.04
CC(COC(=O)CCCCCCCCC(=O)O)NC(=O)[C@@H1](CC(C)C)COC(=O)C(C)NC(=O)C(NC(=O)[C@@H1](N)CCCNC(=N)N)CSSC[C@@H1]C(=O)N[C@@H1](CC1=C[NH1]C2=CC=CC=C12)C(=O)N[C@@](C)CCCCCCCCCCCCC	True	1215.68	8.19	11	14	49	339.11	0.01	No	4	No	5.86
CN(C1[C@@H1]CN(CCCS(=O)(=O)O)[C@H1]1C(=O)NCC2=CN(CC3=CC=C(Cl)C=C3Cl)N=N2)[C@@H1](N)CC4=CC=C(O)C=C4C	True	653.61	2.26	4	10	13	166.91	0.159	No	1	No	4.42
CN(C)C(=N)N/N=C\C(=O)C=CC=CC=C1C=CC2=CC=CC([N+1](=O)[O-1])=C2N=C1CC(=O)[C@H1][C@H1](O)[C@@H1]N	True	505.54	2.02	4	9	11	187.37	0.088	No	1	No	4.91
O1C2=NC3=CC=CC=C3C1[C@]2O	True	160.15	1.71	1	3	0	41.82	0.627	No	0	Yes	4.3
C1N(C)C=NC2=NC(/C=C/C3=CC=C(F)C=C3)=CC(O)=C2C1=O	True	311.32	2.88	1	5	2	65.79	0.926	No	0	Yes	3.2
COC1=CC(OC)=C(Cl)C=C1C=C2C(=O)C(OC)=CC2=O	True	308.72	2.42	0	5	4	61.83	0.631	No	0	Yes	2.51
C1N(CC2=CC=NC2CCCC=O)CC(=O)NCC3=CC(C(C)(C)C)=CC(=C3O)C1	True	411.55	2.91	2	5	6	82	0.557	Yes	0	Yes	5.04
C123C=CC=C(NC(=O)/C=C/C4=CC(Cl)=CC(Cl)=C4OC)C=CC=NC1=C(O)C2=C3	True	427.29	4.92	2	4	4	70.92	0.67	No	0	Yes	4.98
CN(CC1=CC=C(C2=CC=C(Cl)C=C2)C=C1)CC(N)=O	True	288.78	2.92	1	2	5	46.33	0.919	No	0	Yes	1.72
O1C2=CC=C(O)N=C2C1=O	True	137.09	0.32	1	4	0	59.42	0.523	No	0	Yes	3.16
CN(CC1=CC=CC=C1)C(=S)NC2NC(=O)OC2	True	265.34	1.06	2	3	3	53.6	0.8	No	0	Yes	3.18
C1C(OC(=O)C2=CC=C(N=[N+1]=[N-1])C=C2C)C=CC=CCOC(F)(F)C(=O)C(F)C3(O)C(C4)C5(C)C(CC(C5)O3)C4(C)C=C1	True	601.62	6.58	1	7	3	130.82	0.137	Yes	2	No	7.21
COC(=O)[C@@H1](CO)NC(=O)OCC	True	191.18	-0.73	2	5	4	84.86	0.572	No	0	Yes	2.38
C[C@H1]OC[C@]O[C@H1](OC)[C@H1](O)[C@@H1](O[C@H1]O[C@H1]COC1O[C@H1](CO)[C@H1](O)[C@H1](N)[C@H1]1O[C@H1]O[C@@H1](N)[C@@H1](O)[C@H1](O)[C@H1])OO[C@H1]	True	598.56	-3.51	7	18	24	254.72	0.025	No	3	No	7.03
N1S(=O)(=O)C[C@H1][C@H1](CCC2=CC=CC=C2)OCCOC(=O)[C@H1](C3=CC=C(O)C(O4)=C3)C=C(C=C4OC)[C@H1]1CC5=CC=C(O)C=C5	True	634.73	4.3	3	9	6	140.62	0.339	No	1	No	6.11
C12N(CC3=CC=C(C4=CC=CC(F)=C4)C=C3F)C(SCC(=O)N5CCOCC5)=NC6=CC(F)=CC(=C6OC)SC1=N2	True	598.67	5.71	0	8	6	66.73	0.363	No	2	No	4.88
CN(C(=O)OCC1=CC=C(OCCO[N+1](=O)[O-1])C=C1)C2=CC=CC=C2	True	346.34	3.05	0	6	8	91.14	0.414	No	0	Yes	2.18
C[C@@H1]CN(S(C)(=O)(O)CC)C[C@H1](C(=O)N[C@@H1](CC(C)C)C(=O)N[C@@H1](CC1=CC=CC=C1)C(N)=O)C(C)C	True	539.76	2.39	4	4	16	141.83	0.255	No	1	No	4.41
C12[C@H1](O[C@@H1]O[C@H1](CO)[C@H1]1O[C@@H1]O[C@H1](COC3=CC=CC=C3O)[C@H1]O[C@@H1]4C=C(OC)[C@@H1](O[C@H1]5O[C@H1](C)[C@@H1](O)[C@H1](O[C@@H1]6O[C@H1](CO)[C@H1](O)[C@H1](O)[C@H1]6O)[C@H1]5OO[C@@H1]4)CO[C@@H1])O2	True	832.76	-2.16	7	22	17	283.36	0.065	No	3	No	7.36
COC1=CC2=CC=C1C[C@@H1](CC/C=C3\CCCCC3)NC[C@H1]2C	True	313.48	4.98	1	2	4	21.26	0.791	No	0	Yes	4.9
C12N(CC=C3C=CC(C(=O)C(C)(C)C)=C3)C[C@H1]CN(C(=S)NCCC4=CC=[N+1]([O-1])C=C4)CCCCCN(CC[N+1](=O)[O-1])[C@@H1]1C2	True	623.84	3.49	1	7	9	108.9	0.145	No	1	No	5.3
N1C(=O)[C@@H1](CCC/N=CCCCSN)NC(=O)OCCC2=CC=CC3=C2CNC(C3=O)[C@H1](O[C@H1]4C[C@H1](OC)[C@H1](O)[C@H1](O)[C@H1]4OC)C1	True	665.81	0.26	6	13	12	203.06	0.101	No	3	No	6.89
C1C=CC(Br)=CC1=O	True	173.01	1.79	0	1	0	17.07	0.545	No	0	Yes	3.32
CN(CC1=CC=C(C2=CSC=N2)C=C1)[C@H1]3CCCCN3	True	287.43	3.34	1	4	4	28.16	0.935	No	0	Yes	3.14
C1OC2=C(C=CC=C2[C@H1](C3)CC3)OC(=O)C4=COC(=C45)C=C1C=C5	True	320.34	4.81	0	4	1	48.67	0.477	No	0	Yes	4.29
CCOC(=O)/C=C/CCCCCCCCCCCC(=O)O	True	298.42	4.48	1	3	14	63.6	0.292	No	0	Yes	2.09
COC1=CC(C2=NC=C(C)C=C2F)=CC=CC1=C([C@@H1]O[C@H1](C3O[C@@H1](C)[C@H1](NC(=O)CC4=CC=CC=C4)[C@H1]3)OC(=O)OOC5[C@H1]O[C@@H1]N6C=C(F)C(=O)[NH1]C6=O)[C@@H1]5OP(=O)(O)O	True	870.71	3.31	4	15	12	245.29	0.116	No	2	No	6.61
CC(=O)C1C(=O)NC(=S)NC1=S	True	202.26	-0.48	2	4	1	58.2	0.444	No	0	Yes	3.81
O1C=NC=CC(NC(=O)[C@H1](O)[C@@H1](O)C(C)(O)OC=C)N=C(I)C1=CS	True	483.28	0.2	5	9	6	132.97	0.159	No	0	Yes	6.23
CC(CNC(=O)[C@@H1]1CCCN1C(=O)[C@@H1](N)CCCCCCCCCCCC[C@@H1]2)CCCN2C(=O)CCC3C=C[NH1]C4=CC=CC=C34	True	634.93	7.03	3	5	3	107.77	0.331	No	2	No	5
O1[C@](C2=CC=C(F)C(F)=C2OC[C@H1]3O)C[C@@](C)(C1O)[C@@]3CO	True	314.28	0.91	3	5	1	79.15	0.718	No	0	Yes	5.78
CN(C=C1[N+1](C2=CC=CC=C2)C=CC=CC=C1Cl)C(N)=O	True	301.78	3.52	1	2	2	52.23	0.835	No	0	Yes	3.79
CC[C@@H1](NC(C)=O)[O-1]	True	116.14	-0.78	1	2	2	52.16	0.481	No	0	Yes	3.86
C1C(C[C@H1]2C[C@H1](C)CC[C@H1]21)OO[C@@](C)(COC(C)=O)C(OC(C)=O)[C@@]3(O)C(C)C=C(C)[C@]3(O)C	True	482.61	3.48	2	8	8	111.52	0.234	No	0	Yes	5.38
C1OC(CCC2=CC=CC=C2)CC1	True	176.26	2.8	0	1	3	9.23	0.688	No	0	Yes	2.07
N1C(=O)N1CC2=CC=CC=C2CCCCNS(=O)(=O)C3=CC=C4C=CC=CC4=C3N=N	True	437.53	4.24	3	5	10	124.4	0.249	Yes	0	Yes	2.81
C[C@H1](C[C@@H1]C(=O)N[C@H1]1C[C@@H1]1[C@@H1](CC)[C@H1])O[C@@](C)[C@@H1]C[C@@](O)O[C@@H1]O[C@H1](C)[C@@H1](O)[C@@H1](O)[C@@H1](O)[C@H1]	True	468.57	1.57	5	8	18	137.71	0.204	No	0	Yes	6.42
N1C(=O)C=C2N(CCCCCC3=CC=C(C=C3C)OCCC)N=NC2=C1C	True	368.48	3.94	1	5	9	72.8	0.581	No	0	Yes	2.69
C1OC(=O)[C@H1]O[C@@H1]OC(C)(C)O[C@@H1](OC)[C@@H1](O)[C@@H1]1O[C@@H1]O[C@H1]COCP(=O)OC(C(=O)[O-1])OC(=O)CC(O)C(N)CNS(=O)(=O)C=CC=CC=CS(=O)(=O)NC(=O)C(F)(F)[C@@H1]C(=O)O[C@H1]	True	999.82	-3.21	5	25	27	385.83	0.014	No	2	No	7.69
CNC(=O)[C@H1](CC(N)=O)N1C(=O)[C@H1](CO)NC(=O)[C@H1](CC2=CC=C(O)C=C2)NC(=O)CNC(=O)[C@@H1](CCCNC(=N)N)NC(=O)[C@@H1](CC3=CC=C4C=CC=CC4=C3)NC(=O)[C@H1](C5CCCCCC5)NC1=O	True	985.11	-1.48	13	12	14	369.46	0.038	No	3	No	5.79
O1[C@](C2=CC=C(C(F)(F)F)C=C2)CC1=O	True	215.15	2.53	0	2	1	26.3	0.673	No	0	Yes	2.56
C1OC2=CC(OC)=C(OC)C(O)=C2C=CC=C([C@H1](O)O1)CCl	True	328.75	2.27	2	6	3	77.38	0.829	No	0	Yes	4.18
CC(CCCCC1CCCCCCCCCCCCCCCCCCCCCCNCCOCCCN[C@H1])O[C@@](CO)(C[C@H1]2OC(O)[C@H1](O)[C@@H1](O)[C@@H1]2)O[C@@H1](O)[C@@H1]1O[C@H1]CC[C@@](C)[C@H1](O)C(=O)[C@@H1](O)[C@H1]3[C@@]4(C)CCC(=O)C(C)(C)[C@@H1]4CC[C@]3C	True	1177.7	10.31	9	16	42	245.96	0.02	No	4	No	7.49
O1C=NC=C(CN2C=CC=C21)C	True	162.19	1.81	0	3	0	26.52	0.571	No	0	Yes	4.12
O1C2=CC=CC=C2[C@H1]1CN	True	135.17	1.08	1	2	1	35.25	0.625	No	0	Yes	2.77
O1C=NN=C(C=C2C3=C(C=CN3C4CCOCC4)C)N2N1	True	287.32	2.14	1	6	2	73.8	0.783	No	0	Yes	3.99
N[C@H1]1CCCC[C@@H1]1CO	True	129.2	0.5	2	2	1	46.25	0.541	No	0	Yes	3.04
N12C(=O)C=CC=C3C(C=CN3C(=O)NC4=CC=C(C=CCC(F)(F)F)C=C4NCC5=CC=C6C=C51)=C(C7=CC=C(O)C=C7)[N+1]6=C2	True	608.6	6.85	3	6	3	92.17	0.192	No	2	No	5.52
C1N(C2)CC=CC(OCC3CNCC4C(CCC5(C4)OCC6[C@@H1][C@@H1]5CC7[C@](C)[C@@H1](C(=O)O)C[C@@]7(C)C6C)C3)=CC2=C1	True	562.8	5.29	2	5	4	71.03	0.485	No	2	No	7.58
C1OC=CC(N)=C(CN(C)C(=O)OC(C)(C)C)C=C1OCCCCCC[18F]	True	383.49	4.04	1	5	9	74.02	0.608	No	0	Yes	3.51
ClC1=CC=CC=C1[C@@H1]C(=O)O	True	169.59	1.98	1	1	2	37.3	0.735	No	0	Yes	2.37
C1C2=NN(C3CCCCC3)N=C2C1=O	True	191.23	1.52	0	4	1	47.78	0.676	No	0	Yes	3.09
C12N(CC3=CC=CC(F)=C3OCC)OC[C@@]4(C)[C@@H1](CC[C@@H1]5OC(=O)C(=C)[C@@H1]5C)CCC[C@@]1[C@@H1]24	True	456.58	5.25	0	5	7	48	0.414	No	1	No	4.99
C[S@](=O)(=O)CC(=O)N1CCN(S(C)(=O)=O)CC1	True	284.36	-1.87	0	5	3	91.83	0.606	No	0	Yes	2.24
C1[C@H1]2CNC(=O)[C@]2(C)[C@@H1]1CCCl	True	187.67	1.39	1	1	2	29.1	0.651	No	0	Yes	4.55
O1C2=NC=C(F)C=C2C(C3=CC=C(Cl)C=C3)=NN1CC4=CC=CC=C4C5=CC=NC(C(N)=O)=C5	True	473.9	4.6	1	6	5	93.7	0.457	No	0	Yes	3.02
N1C(=O)C2=CC=C3C(=C12)[C@@](C4=CC=CC(Cl)=C4F)CN3	True	287.7	3.44	2	2	1	41.13	0.843	No	0	Yes	3.1
N[C@H1](CCC1=CC=CC=C1)C(=O)O	True	179.22	1.03	2	2	4	63.32	0.725	No	0	Yes	2.02
C1/C(=C/C(=O)N[C@@H1](C)C2=CC=CC=C2C)C=CC=CCC(=O)[C@]3(CC4CC(O[C@@H1]3O)CO4)C(=O)C1=O	True	493.56	2.59	2	7	3	119	0.377	Yes	0	Yes	6.44
COC(=O)CCC1=CC=C(C)C(OCC)=C1	True	222.28	2.5	0	3	5	35.53	0.718	No	0	Yes	1.69
O/N=C1\CCCN1	True	100.12	0.16	2	2	0	44.62	0.336	No	0	Yes	4.08
C1NC(=O)/C(=C/C2=CC=CC=C2NC(=O)C3CCCCC3)NS1C(=O)CCCC	True	417.58	3.86	4	4	6	87.3	0.418	No	0	Yes	3.78
C1N(CC=C2C=CC(S(=O)(=O)CC)=C2)CCC1	True	253.37	1.9	0	3	4	37.38	0.768	No	0	Yes	3.17
CN(CC1=CC=C(OCC(C)C)C=C1)CC2CCCCC2O	True	305.46	3.7	1	3	7	32.7	0.833	No	0	Yes	2.8
C1OC(CN2C=CC=C2)[C@H1]1C3=CC=NC=C3Cl	True	248.71	2.72	0	3	3	27.05	0.835	No	0	Yes	3.61
CC(NC(=O)[C@H1](CO)NC(=O)[C@@H1](N)C(C)CC)(O)N[C@H1](C(=O)O)[C@@H1](C)O	True	378.43	-2.96	8	8	11	194.24	0.173	No	1	No	4.17
C1OCC(O)C=2C[C@](C)[C@H1]3CC[C@@H1]4CC(C)(C)CC[C@]4(C)[C@H1]3CC[C@]=21	True	345.55	5.31	1	2	0	29.46	0.603	No	1	No	4.79
C1[S+1]C2=NC=C(C3=CC=CN=C3)C=C2[NH1]C4=CC=CC=C4N=C1	True	318.41	4.04	1	5	1	50.17	0.688	No	0	Yes	3.79
COC(=O)/C(CO)=C/C1C/C=C/C=C(\C)[C@@H1](O)CC(=O)[C@@H1]1C	True	308.37	1.56	2	5	3	83.83	0.61	No	0	Yes	4.83
C12OC=NC=NC(SC=C1C#N)CC(=O)N2	True	236.26	0.39	1	6	0	86.84	0.659	No	0	Yes	6.54
O/N=C/C1CC(CCCCCCCCCCC)S1	True	271.47	5.24	1	3	11	32.59	0.241	No	1	No	3.57
O[C@H1]CN[C@H1]C[C@@H1]([C@H1](NCC1=CC=CN=C1)C(=O)N[C@@H1](CC2=CC=CC=C2)C(=O)N[C@@H1](CCCN=C(N)N)C(N)=O)C=O	True	595.71	-1.22	8	9	21	239.94	0.037	No	2	No	4.43
C12OC(=O)[C@](C)C[C@H1](C)[C@H1][C@@H1]([C@@H1]1OC(=O)C3=CC=CC=C3)C[C@H1]2	True	313.37	3.19	0	4	2	52.6	0.787	No	0	Yes	5.51
C1C(NP(=O)([O-1])C[C@@H1]1C(=O)NOCC)(O)NC2=NN=C(S)N2	True	351.31	-1.62	6	9	5	164.32	0.158	No	1	No	5.57
CN(CC1=CC=CC=C1C2=CC=CC=C2F)C3=NN=N[NH1]3	True	283.31	2.64	1	4	4	57.7	0.799	No	0	Yes	2.55
C1OC2=CC(N)=CC=C2N=C1C	True	162.19	1.75	1	3	0	47.61	0.591	No	0	Yes	2.98
C=NCC1=CC=C(F)C=C1C(F)(F)F	True	205.15	3.05	0	1	2	12.36	0.519	No	0	Yes	2.73
C123C(C[C@H1]4CC(=O)C=C5[C@@H1]C[C@@](C6CC[C@@](C)C7CC(C)(C)C(=O)CC[C@@]76)C[C@]5(C)[C@H1]4OC1)CC[C@@]2(C)[C@]3	True	514.75	7.34	0	3	1	43.37	0.368	No	2	No	6.77
OC[C@@H1]CN(CCC(=O)N/N=C/C1=CC=C(Cl)C=C1)Cl	True	317.2	1.83	2	4	8	64.93	0.437	No	0	Yes	3.03
C1OC=C2C(=CC(=CC2=O)N(C)C(=O)[C@H1](C)O)[C@H1](NC(=O)CC(C)CCS)C(N)CC(=O)O1	True	481.57	0.18	4	9	7	148.26	0.297	No	0	Yes	5.4
C1S(=O)(=O)C2=CC=CC=C21	True	154.19	0.97	0	2	0	34.14	0.558	No	0	Yes	2.42
O1C=N[NH1]C(=O)C=C1	True	112.09	-0.41	1	3	0	50.69	0.463	No	0	Yes	4.58
C1N2N=C(C=CC3=NC(NCC4=CC=CC(C)=C4)=N3)C=C2C1=O	True	305.34	1.96	1	6	4	71.64	0.938	No	0	Yes	3.31
C1CC(=O)N2C3=CC=C(Br)C4=C3NC(=O)[C@@H1][C@@H1](C(C)C)C5C=N[C@](C)([C@H1]6CN(C)CCC6OC7=CC(C)=CC=C7)C[C@@]15[C@@H1]42	True	646.65	6.6	1	5	4	74.24	0.406	No	2	No	7.23
O1[C@@H1]CC[C@@H1]2C=N[NH1]C21	True	125.15	0.49	1	3	0	33.62	0.511	No	0	Yes	5.62
CC(CSC[C@@H1](N)C(=O)NC1CC[C@H1]1C(=O)OCN)(C)CC(=O)O	True	361.46	-0.1	4	7	10	144.74	0.312	No	0	Yes	4.05
N#CCS1CC2=CC=CC=C2C3=CC=CC=C3N1	True	254.36	3.72	2	2	1	35.82	0.761	No	0	Yes	3.83
COC(CCCCCCSCC[C@@H1]1CCCN(C)CC1C)CC(=O)CCCCC(C)(C)CO	True	485.82	6.59	1	5	19	49.77	0.209	No	1	No	4
CN(CC=C1C=CC2=NC=CC(OC)=C2C=C1C)C=O	True	270.33	2.53	0	3	4	42.43	0.79	No	0	Yes	3.67
CN(CC1=CC=C(OC(F)F)C=C1CC)C=O	True	243.25	2.44	0	2	6	29.54	0.718	No	0	Yes	2.58
O1C2=CC=C(CNC[C@H1](O)CO)C1=C2O	True	211.22	-0.06	4	5	5	81.95	0.557	No	0	Yes	3.88
C1C(COP(=O)(C2=CC=CC=C2F)SCC3=CC=CC(S(=O)(=O)OC)=C3C(O)C4)=CC=CC=C14	True	522.56	5.18	1	7	3	89.9	0.439	No	2	No	5.91
C1N(C(=N)NC(=O)C2=CC=CC=C2C)CC1	True	217.27	1.37	2	2	1	56.19	0.551	No	0	Yes	2.31
C1[C@@H1](CC(=O)N[C@H1](C)C(N)(C)C)[C@H1]2C[C@@]12O	True	226.32	0.39	3	3	4	75.35	0.649	No	0	Yes	4.62
O1/N=C\CCCC=CC=C(OC(=O)C(=O)OC)C(=O)C2=CC=C(CN2)C1=O	True	374.35	0.84	1	9	1	120.36	0.407	No	0	Yes	5.11
O1C=NC2=C(CN(C)C2(F)F)CNC(=O)CCC=3C=C[NH1]C=3NC1=NC#N	True	377.36	1.16	3	6	0	117.9	0.463	No	0	Yes	5.02
CN(CC(=O)NC(C)C)CC(=O)COC(C)=O	True	244.29	-0.42	1	5	7	75.71	0.615	No	0	Yes	2.36
N1C(=O)[C@@H1]2CCCN2C(=O)OCC3=CC=CC=C3C1C(N)=O	True	303.32	0.44	2	4	1	101.73	0.786	No	0	Yes	3.78
N1C(=O)[C@@H1]2CCCN2C(=O)OCC3=CC=CC=C3[C@H1]1C(=O)NO	True	319.32	0.46	3	5	1	107.97	0.515	No	0	Yes	3.83
C[C@H1](NC(=O)[C@H1](CCCCNC(=N)N)NC(=O)[C@@H1]NC(=O)CNC(=O)[C@H1](CCCNC(=N)N)NC(=O)[C@@H1]1CCCN1C(=O)[C@H1](CC2=C[NH1]C=N2)NC(=O)[C@@H1](N)CC[C@H1]C)OC(=O)N[C@H1](CC(=O)NC(CCCN)C(=O)O)C	True	1090.26	-4.68	18	16	36	504.16	0.013	No	3	No	5.99
O1C2=CC=C(OC3CC=CCC3)C=C2C=C4N(CC5=C([NH1]C6=CC=CC=C6C5=O)[C@H1]C=C(C[C@]4OC)[C@](CO)[C@@H1](O)C7=NC=CC=C7C[C@H1](C)[C@H1]1O[C@@H1]8O[C@H1](C)[C@@H1](O)[C@H1](O)[C@@H1]8O[C@H1]C[C@@H1]OC(=O)CCC(=O)OC)[C@H1]	True	1031.15	6.26	5	17	14	237.89	0.053	No	3	No	7.83
C=1C(C(=O)N(O)CC[C@H1](C)C=O)OC(C)C=1O	True	243.26	0.66	2	5	5	87.07	0.421	No	0	Yes	4.85
CNC1CC(NCCOCC2=CC=CC=C2)CC1	True	248.37	1.93	2	3	7	33.29	0.723	No	0	Yes	2.77
C1[N@@+1]CC2[C@](C)(CCC(O)CCCCCCCCCCCCCCCCC)CC12	True	406.72	7.65	1	1	19	34.33	0.22	No	1	No	4.3
NC(=O)NC[C@@H1](NC(=O)[C@@H1](N)CCCCNC)OC(=O)NCCCCCCO	True	404.51	-0.91	7	7	16	180.83	0.128	No	1	No	3.55
COC=NC=NC(NC1=CC=CC=C1)=CC=COC=CC=C(C2=CC=C(CO)C=C2C(=O)O)CC=C	True	487.56	5.54	3	6	14	112.74	0.106	No	1	No	4.01
O1C=N[NH1]C=C(C[C@H1]CC2[C@@H1]C(C)(C)[C@H1](O)CC2)OC(=O)O[C@@H1]1[C@@H1]C	True	351.42	3.08	2	7	5	89.38	0.74	No	0	Yes	6.22
C123C(O)CC[C@](C)C1C[C@@](C)[C@@H1]C4[C@@H1](O)[C@@H1](O)[C@@H1](C)[C@@H1](CC)ON4C5C=C2C=C(C)C=C5O3	True	456.6	3.21	3	6	1	82.39	0.562	No	0	Yes	7.91
C1=CN=C(C(=O)NCC2C(C)C(C)(C)OC2N)NN=C(C3=CC4=C(C=CC=C4)CCC)N=C13	True	448.57	2.49	3	6	6	118.81	0.533	No	0	Yes	5.44
C1S(=O)(=O)CC(=O)C=CC=CC=C(O)C(/C=C/C2=CC=CC=C2C)[C@H1]1C(=O)N[C@@H1]CN[C@@H1]CCCOC	True	528.67	3.25	3	7	11	121.8	0.377	No	1	No	5.19
COC(O)OC	True	92.09	-0.44	1	3	2	38.69	0.469	No	0	Yes	3.41
CCCCCCCCC/C=C\C(O)/C=C/C=C(O)CC(C)(C)CC=O	True	350.54	6.05	2	3	15	57.53	0.124	No	1	No	3.84
O1[C@@H1][C@@H1]CCCNCCCNCCC(=O)N[C@@H1](CCCCNC=NC(CN)=[N+1]=[N-1])[C@H1]2CC(=O)O[C@H1](CO)[C@H1](OC3=CC=CC=C3)[C@H1]2OCC4=CC=C(C=N4)C=C1	True	775.95	2.3	6	11	10	227.08	0.051	Yes	3	No	7
C1N(CC2=CC=C(OCC3CC3)C=C2)CC4=CC(F)=C(F)C=C4C1=O	True	343.37	3.95	0	3	5	29.54	0.823	No	0	Yes	2.33
COC(=O)/C=C/C1=CC=C(C)C=C1	True	176.21	2.18	0	2	2	26.3	0.51	No	0	Yes	1.67
C=1CC(=O)O[C@H1]CC2[C@@](C)[C@@H1](CC#N)C(=O)[C@@H1]2CC[C@]=1C	True	287.36	3.15	0	4	1	67.16	0.549	No	0	Yes	5.32
COCCCCCCC/C=C\C/C=C\C/C=C\C/C=C\CCCC(=O)OC(CC)CCC(C)CC	True	488.8	9.69	0	3	24	35.53	0.077	No	1	No	3.79
C1N(CC2=C[NH1]C3=CC=C(Cl)C=C23)C4=CC=CC=C4NC1=O	True	311.77	3.78	2	2	2	48.13	0.756	No	0	Yes	2.27
CN(CC1=CC=CC=C1C2=CC=CC=C2Cl)N=C(C3=CC=CC=C3)C4=CC=CC=C4	True	410.95	6.89	0	2	6	15.6	0.249	No	1	No	2.26
C1OC2=CC(OC)=CC=C2C1C3=CC=C4N(C3=O)C5=CC=CC=C54	True	317.34	3.35	0	4	2	40.46	0.569	No	0	Yes	3.02
O1C2=NC=C(C3=CC=C(C(F)(F)F)C=C3)N2CCCCNN1NCO	True	357.34	1.92	3	7	3	74.58	0.729	No	0	Yes	3.85
CC(=O)NCCCCN(C(=O)[C@H1](C)NC(C)=O)C=O	True	271.32	-0.59	2	4	8	95.58	0.456	No	0	Yes	3.12
CC(=O)O[C@H1](C)C(=O)[C@H1](C)/C=C/C(C)(C)C[C@@](O)([C@@H1](C)O)[C@](C)C(=O)CC1=CC(OC)=C(OC)C(OC)=C1	True	535.65	3.66	2	9	15	128.59	0.255	No	1	No	4.55
CC(COC(=O)CCCCCCCCCCC[C@@H1]CCC1C[C@H1](C)CO1)(C)CCC[C@@](C)(O)OC	True	497.78	7.78	1	5	22	64.99	0.094	No	1	No	4.27
C/C(=C\C1=CC=C(O)C(OC)=C1OCC)CCCC(C)C	True	292.42	5.03	1	3	8	38.69	0.73	No	1	No	2.49
[O-1][C@@]1[C@@H1]2C[C@@H1]2C(=O)[C@@]1(C)CCCO	True	182.22	-0.12	1	3	3	60.36	0.661	No	0	Yes	4.66
O1N/C(=N/C2=CC=C(NC(=O)OC(C)(C)C)C=C2)N1	True	264.28	2.52	3	4	2	95.41	0.777	No	0	Yes	2.86
O/N=C/C=1C(N)=NSC=1CSC2=CC=CC=C2	True	265.36	2.83	2	6	4	71.5	0.386	No	0	Yes	2.98
C[C@@H1](CCC=C1C(OC(=O)C(C)C)=CC(OC(C)=O)=C1OCC)ONC(=O)[C@H1](CCC(=O)N2CCN(CCCNC(=N3)[NH1]C=NC3C)CC2N)C(=O)CCC(C)(C)S(=O)(=O)NC(C)=O	True	922.12	1.77	5	18	24	278.82	0.04	No	2	No	5.92
O1C=CC=C(NCCCCCCCCC(=O)O)C2=CC(=[N+1]CCCCCC)C2C(=O)N1	True	431.58	3.76	3	5	15	101.76	0.343	No	0	Yes	4.56
CN(CCOC1=CC=C2C(=C1)CC3=CC=CC=C32)CC4CCCC4	True	321.46	4.76	0	2	6	12.47	0.649	No	0	Yes	2.16
C1OC2=CC=CC(F)=C2C(=C1CC)[C@H1]C(=O)C3=CC(O)=CC=C3[C@@H1](C[C@@H1](N)C(=O)NCCCCC(OCCCC4=CC=CC=C4C)CC)C=O	True	685.86	7.2	3	7	20	127.95	0.065	No	2	No	4.57
CC(CCCC1CC[N+1]2=CC(C#N)=CC=C2OC3=CC(O)=CC=C31)=CC(C)(C)OC(C)(C)O	True	451.59	5.47	2	5	7	86.59	0.331	No	1	No	4.37
CC(CC=C(C1=CC=C(OC)C=C1O)C=CC(C)=COCN)=O	True	317.39	3.16	2	5	8	81.78	0.437	No	0	Yes	3.37
CN(C(=O)[C@@H1](CC1=CC=C(O)C=C1)NC(=O)OCC2=CC=CC=C2C)CCC	True	384.48	3.41	2	4	8	78.87	0.731	No	0	Yes	2.59
C[C@H1](NP(=O)([O-1])OC1[C@H1]O[C@@H1](O)[C@H1]O)[C@H1]1O[C@@H1]2O[C@H1](CO)[C@@](C)(O)[C@H1]2O	True	400.3	-2.92	6	11	7	190.23	0.189	No	2	No	6.22
FC=C1C=CC=CC1=CC(=O)NCC2=CC=C(C3=CC=CC=C3)C=C2	True	331.39	3.16	1	1	4	29.1	0.782	No	0	Yes	2.51
CNCCCCC=CN=C(C1=C[NH1]C(C2=CC=C(C(F)(F)F)C=C2)=N1)CF	True	382.41	4.76	2	3	9	53.07	0.373	No	0	Yes	3.38
C[C@@H1]1CCC(=O)[C@@H1]1/C=C/[C@H1][C@H1](O)[C@@H1](C)[C@@H1](O)[C@@H1](O[C@H1]2C[C@H1](OC)[C@@H1](OC)[C@H1](C)O2)C=O	True	441.54	1.47	2	8	11	111.52	0.464	No	0	Yes	5.5
OCOC(CCCCCCCCC)C=CC(=CC(CC(=O)[O-1])=CC=C)NC(=O)C(OC(=O)CSCCCCCCCCCCCSCCCCCCC(=O)C[C@@H1](NC(=O)[C@H1](CO)NC(=O)[C@H1](CN)C(C)CC)C=O)(N)ONC	True	1140.58	6.25	8	18	53	310.86	0.008	No	4	No	6.31
C1S2C3=CC=CC=C3C(=O)[C@]2OC(=O)[C@@](C)(Br)[C@@H1](C(C)C)[C@H1][C@@H1](C)C=CSC=NC1	True	510.52	5.83	1	5	1	55.73	0.294	No	2	No	6.21
FC=CC=NC([C@@]C=C1[C@@H1]C[C@H1](O1)[C@H1](C)[C@H1][C@]C)OC(C2=NC(C3=CC=C(S(N)(=O)=O)C=C3)=CC2=CNC=O)OCO	True	598.65	2.85	3	9	16	161.9	0.15	No	1	No	6.08
C1OC(=O)/C=C/C[C@@H1][C@@H1]1C2[C@@H1](C)[C@@H1]2C3CC/C(=C/C4CCC4=O)O3	True	329.42	3.23	0	4	3	52.6	0.746	No	0	Yes	5.49
N[C@H1]1CCCC[C@@H1]1CCCN(CC2=CC=C(Cl)C(C(=O)O)=C2)CCC3=CC=C(C=C3)C4=CC=C(C=C4)C/C=C\CCCOC(=O)C(CCCN)NC(=O)CN	True	774.45	6.65	5	8	23	174	0.04	No	2	No	4.18
C1N(C)CC=C2C=C(OC)C(=O)C=C2C=CC[C@H1]([C@H1](C)CCCC(O)(CC)CCC)C3=CC=C(C=C3)C1=CC(=O)O	True	561.76	6.84	2	5	10	87.07	0.304	No	2	No	5.76
C[C@@H1]1CC[C@](C)(O)C[C@H1]1[C@H1](C)C(O)CC(C)C	True	242.4	3.22	2	2	4	40.46	0.794	No	0	Yes	4.26
O1[C@](CCN(C2=CC=C(Cl)C=N2)[C@H1]1C(=O)OC)CCN3CCCCC3=O	True	380.85	2.4	0	6	5	71.97	0.73	No	0	Yes	3.52
C1CNC(=O)C2=C(NC(=O)C(C)CC3=CC=CC=C3)NC(=NCCNCCCC4=CC=CC=C4)N1CCCCCOCC2	True	588.8	3.38	4	5	11	107.09	0.3	No	1	No	4.8
C[C@H1](NC(=O)[C@H1](CC1=CN(CC2=CC=CC=C2)N=N1)NC(=O)[C@@H1](CC3=C[NH1]C4=CC=CC=C34)NC(=O)[C@H1](C5CCCCC5)NC(C)=O)C	True	654.82	3.17	5	7	14	162.9	0.14	No	1	No	3.78
CC(C[C@H1](O)/C(=C/C1=CC=C(OC)C=C1O[C@H1])COC2=CC=C([N+1](=O)[O-1])C=C2[N+1](=O)[O-1])CC	True	458.47	4.82	1	8	12	134.2	0.353	No	0	Yes	3.86
C12[C@@H1](C[C@H1]O[C@](COC(=O)C=CC=CC(NC(=O)/C=C/C3=CC=CC(C(=O)O)=C3)N=N)O[C@@H1]4OC(C)=C(C)[C@H1]1OC4(C)C[C@H1](OC(C)=O)[C@H1]2OC(=O)CCC5)CC=C(OC(=O)CC)C(OC(C)=O)=C5OC	True	990.02	6.72	3	19	15	280.26	0.054	Yes	3	No	7.92
N1C(C2=CC=CC(F)=C2)CC1	True	151.18	1.86	1	1	1	12.03	0.646	No	0	Yes	2.48
C[C@@H1](COC(=O)CNC1C[C@H1]2C[C@@]21COC)N(CC3=CC=C([Se]C(C)(C)C)C=C3)C4CC4	True	507.58	3.15	1	5	12	50.8	0.348	No	1	No	4.67
C123OC4=CC(=CC=C4O[C@@H1]1COC(C)=O)C56OC=C(C(O)=C5C(=O)C2C)CC36C	True	396.4	2.69	1	7	2	91.29	0.769	No	0	Yes	7.04
C12N(C)C(=O)C=NC(C=C(C)C3=CCC45C(C(=O)CCC43C6)(C)CC[C@@]7C(=O)C(OC)=CC[C@]7(C)C6C)CC5=C(C)C1=C2	True	581.78	6.45	0	5	1	76.04	0.357	No	2	No	7.71
O[C@](O)([C@H1](OC)CC1=CC(OC)=CC=C1OC2=CC(OC)=CC=C2[C@@](C)C3=CC=CC[N+1](=O)[O-1])C3OC	True	514.55	3.46	2	9	7	129.75	0.324	No	1	No	4.69
CN(CCC=CC=C(Cl)S)C(=O)OS(=O)(=O)C1=CC=CC=C1	True	361.87	3.4	1	5	6	63.68	0.479	No	0	Yes	3.24
O1/N=C\CCN(CCCCNC(=O)C2=CC=C(Br)C=C2OC3=C(O)C=C(C(O)=C3CO)CCC)OC1=O	True	580.43	4.37	4	10	11	150.15	0.173	No	1	No	3.59
C1=NCC2=CC=C(C=C21)OCCC	True	175.23	2.41	0	2	3	21.59	0.691	No	0	Yes	2.56
O[C@@H1][C@H1](OC(=O)CCCCCC1CCC(=O)NCCO[C@@H1]2O[C@H1](C)[C@@H1](O)[C@@H1](O)[C@H1]2O[C@@H1]3O[C@H1](CO)[C@@H1](O)[C@H1]O)[C@H1]3O[C@H1](O)[C@H1](C)OCCN(C)CCCCNC(=O)N[C@H1](C)[C@@H1](O)[C@@H1]1O[C@@H1]4O[C@H1](C)C[C@H1](N(C)C)[C@H1]4O	True	1084.26	-1.93	12	23	9	358.92	0.112	No	3	No	5.54
N12C(=O)[C@H1](N)CCC/N=C(/N)C=C(O)OC3=CC=CC=C3C=[N+1][C@@H1]1N2C(=O)OC(C)(C)C	True	444.49	0.98	3	9	0	157.35	0.503	No	0	Yes	5.13
O[C@@H1](COP(=O)(O)OP(=O)(O)OC)CONP(N)(=O)O	True	360.09	-1.19	6	8	10	207.1	0.2	No	1	No	4.78
COCC1CC2C(C)C3=CC(=O)C4=CC=CC=C4OC3[C@@H1]2[C@H1]1CNCC5=CC=CC=C5	True	417.55	4.51	1	4	6	47.56	0.751	No	0	Yes	4.3
O1[C@@H1]2[C@H1]3O[C@@](C)(O)CC[C@]3(C)CC[C@@]2(C)[C@]1C	True	239.33	2.63	1	3	0	38.69	0.706	No	0	Yes	5.08
ClC1=CC=CC=C1CNC	True	155.63	2.06	1	1	2	12.03	0.69	No	0	Yes	1.54
C12OC(O)OC3(C[C@](C)(O)C(=O)C1OC3C)C2C=CC=O	True	298.29	-0.7	2	7	2	102.29	0.513	No	0	Yes	6.98
N1CC2C=CC=C(C3=CC=C(O)C=C3)C2=C1O	True	227.26	2.33	3	3	1	52.49	0.69	No	0	Yes	3.6
O1C2=NC3[NH1]C(=O)C=C3C21	True	136.11	-0.82	1	3	0	53.99	0.442	No	0	Yes	5.24
CN(C)C(=O)/C=C/C1=CC(C)=CC(O)=C1	True	205.26	1.8	1	2	2	40.54	0.748	No	0	Yes	2.32
C1NN=C(C2=CC=C(C(F)(F)F)C=C2)C3=CC=C1C3	True	264.25	3.27	1	2	1	24.39	0.827	No	0	Yes	3.96
O1C=NC2=CC=C(F)C=C2N=C1	True	164.14	2.18	0	3	0	33.95	0.578	No	0	Yes	3.61
O1[C@H1]CNS(=O)(=O)C[C@H1]1CC	True	178.23	-0.12	1	3	1	55.4	0.609	No	0	Yes	4.75
CC(=O)NCC1CCC[C@H1](O)COC2=CC=CC(=C2)OC=CC(OC(C)C)C=C(OC(=O)[C@@H1](C)CC3C=CC(OCC(=O)O)=CCOC(OC)=C(O)C3=C)C=C1	True	781.9	6.18	4	12	12	188.54	0.176	No	3	No	6.9
N1S(=O)(=O)C2=CC=CC=C21	True	155.18	0.8	1	2	0	46.17	0.602	No	0	Yes	2.52
C1OC2=CC(Cl)=C(Cl)C=C2C(=O)N1CCCNC3=C4C(=NC5=CC=CC=C35)CCCC4	True	456.37	5.71	1	4	5	54.46	0.5	No	1	No	2.67
OC=CC=C(OCC(=O)OCCCCl)C=C[N+1](CC(=O)NCCCCCCCCCC1=CC=CC2=C1C3=NC2C(=O)N3NOC(=O)C4=C(F)C=CC)=C4F	True	773.25	5.53	3	10	10	158.87	0.053	No	2	No	6.21
C12NN=C(C3=CC=C(Cl)C=C3OC4=CC=C(O)C=C4)N=C1C2=O	True	327.73	2.5	2	6	3	83.28	0.907	No	0	Yes	3.41
C[C@H1]O[C@@H1]O[C@H1](C)[C@@H1]OCO[C@@H1](C)[C@H1]C[C@@H1](O)[C@H1]O[C@H1]O[C@@H1](CO)[C@H1]O[C@H1]CC[C@](C)[C@H1]CC=C[C@@H1]1CC(C)(C)CC[C@]1C(=O)O[C@H1]O[C@](C)(C(=O)O)[C@H1]O[C@@H1]O[C@H1](CO[C@@H1]2O[C@@H1](C)[C@H1](O)[C@@H1](O)[C@H1]2O[C@@H1])CO	True	1043.16	4.88	6	21	43	284.74	0.021	No	3	No	5.97
CN(C)C(=O)C1=CC(OC)=C(C)C=C1Br	True	272.14	2.47	0	2	2	29.54	0.827	No	0	Yes	1.99
COC(=O)[C@H1](C)[C@@H1](O)[C@H1](C)CNC(C)(C)C(=O)N[C@H1](C)C(=O)NCCCC	True	387.52	0.58	4	6	12	116.76	0.288	No	0	Yes	3.78
C=1C(NS(=O)(=O)C=CC2=CC3=CC=CC=C3C4=CC=CC=C24)=NC=1C(=O)N[C@@H1](CO)C(=O)O	True	465.49	1.74	4	6	7	145.16	0.391	No	0	Yes	3.34
C1C(CCCCCCCC)OC(=O)CO[C@](C)O[C@@H1]1[C@](C)C#N	True	323.43	4.08	0	5	8	68.55	0.497	No	0	Yes	4.51
O/N=C\C1CCC1	True	99.13	1.25	1	2	1	32.59	0.299	No	0	Yes	3.11
O1C(=O)CCCC[C@@](C)C(=O)O[C@H1](CC[C@@H1]1CCO)C=O	True	299.34	1.34	1	6	3	89.9	0.625	No	0	Yes	4.44
C12O/N=C/C[C@H1]3O[C@@]3C4[C@H1]OC(=O)[C@H1](CC[C@@H1]1O)[C@@H1]24	True	265.26	0.41	1	6	0	80.65	0.507	No	0	Yes	6.14
C1=NCC=CC2=CC(OCC3=CC=CC=C3)=CC=C21	True	249.31	3.71	0	2	3	21.59	0.812	No	0	Yes	2.53
C1N(CCN2CCCC2)[C@H1](C)C=CC3=C(C4=CC=CC=C4C(=O)O)C(O)=C13	True	366.46	3.32	2	4	5	64.01	0.837	No	0	Yes	3.46
C=[C@@H1]CCNC(=O)C=CC=C1C=CC=CC1=C	True	227.31	1.13	1	1	5	29.1	0.456	No	0	Yes	3.2
C12=C(CCCOC(C[C@](C)(O)C(=O)NCCC(=O)OC3)[C@@H1]O[C@@H1](CC4=CC=C(O)C=C4)[C@H1](O)C3OCC[C@]1(C)O[C@@H1])CO[C@@H1]2C[C@@H1]O	True	661.75	2.06	5	12	5	182.47	0.229	No	2	No	7.03
C[C@H1](C[C@H1]CC[C@H1]1[C@@H1]CC2CC[C@H1](O)[C@@](C)(OC)[C@@H1]2C1[C@H1]C=O)OC[C@H1](O)[C@@H1](CC)N(CC3=CC=C(O)C(OC)=C3)[C@H1]([C@H1]O[C@@H1]4OC(C)(C)O[C@@H1]4[C@H1]O)C(=O)CC5=C(O)C=CC=C5OC(=O)[C@H1]CC6=CC=CC=C6	True	1028.25	7.59	5	16	29	220.21	0.02	No	3	No	6.93
C12OC=C3C(=CCOC3=O)C=CC[C@]C4[C@@](O)([C@@H1](O)O)C(=O)C1=C24	True	330.29	-0.67	3	7	1	113.29	0.432	No	0	Yes	6.06
C1N(CC=2C=COC=2C(C)C)CC3=CC=CC=C31	True	241.33	3.92	0	2	3	16.38	0.809	No	0	Yes	2.41
CC(=O)N1C=CC(C2=NC3=CC=CC=C3C=N2)=CC1=O	True	265.27	2.12	0	5	1	64.85	0.676	No	0	Yes	2.43
C12N(C(=O)C3=CC=C4C=CC=CC4=C3N(C)C)[C@H1]CCC5=CC(OC)=C(OC)C(OC)=C5NC(=O)CCCC[C@H1]1NC2=O	True	587.7	4.55	2	7	5	109.44	0.422	No	1	No	4.54
N1C(=O)N/N=C\C=C2NC(=CC=C21)CCCCCN(CCCCCCCC[S+1](C)CCOC)C(=O)OCCNCC(=O)NCCNC(=O)CNCCNC=CC=C3C=C(C4=CC=C(C(N)=O)C(F)=C4OC5)CC(Br)=CC=C5C3=O	True	1180.28	5.38	9	13	34	279.78	0.021	No	4	No	6.64
C1OC=C(C=O)C(O)=C(CCO)C=C1C	True	210.23	1.24	2	4	3	66.76	0.688	No	0	Yes	3.97
C1CO/N=C\C2[C@H1][C@@H1]C3C(=O)[C@@](C)(Br)[C@@H1](OC(=O)CC(C)C)[C@H1]3CC[C@@]21C	True	440.38	4.14	0	5	3	64.96	0.489	No	0	Yes	5.44
C1OC2=CC=CC=C2[C@H1](C1)N(C)CC	True	191.27	2.46	0	2	2	12.47	0.712	No	0	Yes	2.72
C=C(CC1CCCCO1)C2=C(C=CC(=C2)C)CCC(C(=O)O)=C3NCCCCC3	True	397.56	5.4	2	3	7	58.56	0.605	No	1	No	3.61
C1C(=O)N(CCC(C)C)C[C@H1]1C2=CC=CN=C2	True	232.33	2.44	0	2	4	33.2	0.799	No	0	Yes	2.71
O1C[C@H1](O)[C@@](O)[C@H1]C2C3=CC[C@H1]4[C@@H1](C(=O)O)CC[C@]4(C)[C@H1]3CC[C@@]21CC(C)C	True	390.52	3.74	3	4	3	86.99	0.639	No	0	Yes	5.19
C12N3CC[C@H1]4CCCC[C@]4(C[C@H1]1C2O)O3	True	209.29	1.32	1	3	0	32.7	0.653	No	0	Yes	5.94
CCCCCCCCC1=NC=CC=[N+1]1CCCC(=O)OCC#CCOP(=O)(O)OP(=O)(O)OP(=O)(O)O	True	587.42	2.94	4	9	18	202.89	0.064	No	1	No	4.34
C1N(CCCCC2=CC=CC=C2)CC1	True	189.3	2.72	0	1	5	3.24	0.644	No	0	Yes	1.42
C1C(CCCCC/C(C(F)(O)C(=O)[O-1])OO1)OC(C)=O	True	293.27	-0.39	1	7	3	105.12	0.558	No	0	Yes	4.83
OC(=O)CC1=CC(=O)C[C@H1][C@@]2(C3)CC[C@H1](O)C[C@@H1]2[C@@](C)CC=C13	True	316.4	3.03	2	3	2	74.6	0.821	No	0	Yes	5.99
CN(CC1=CC2=C(C=C1Br)OCO2)C(=O)CC3=CC4=CC=CC=C4N=C3C	True	427.3	4.24	0	4	4	51.66	0.625	No	0	Yes	2.44
C1OC2C(=O)O[C@H1]CC3[C@](C)C(CC[C@]23CN)(C)CCC1	True	293.41	2.62	1	4	1	61.55	0.755	No	0	Yes	6.41
C123N(CCO)C[C@H1]CC=CC=C3OC1C2=O	True	220.25	0.05	1	4	2	49.77	0.714	No	0	Yes	5.82
N12[C@@H1]3[C@@H1]CC[C@]1(C24C[C@H1]4)C=CCCC3	True	187.29	2.49	0	1	0	3.01	0.416	No	0	Yes	6.66
CCO/C(=N\C1=CC=CC=C1OCC)CCO	True	237.3	2.53	1	4	6	51.05	0.611	No	0	Yes	2.58
C1OC1C(=O)OCCCC2=CC=CC=C2	True	206.24	1.56	0	3	5	38.83	0.417	No	0	Yes	2.31
C[C@@H1](OC1=CC=C2C=C1C[C@H1]2)C3=CC=CC=C3	True	223.29	3.94	0	1	3	9.23	0.766	No	0	Yes	3.93
C[C@@H1](OC(=O)[C@H1](O)[C@H1](C)COC[C@H1](O)C[C@@H1](O[C@@H1]CC[C@@H1]C[C@@H1](C)C(O)(OC)/C=C/[C@@H1](CC(C)(C)O)[C@H1]CC[C@H1]1C=C[C@H1](OC(C)=O)[C@]1(C)CCC2)C)O[C@H1](O)[C@H1](C)O[C@@H1]2C[C@H1]O	True	899.17	6.21	6	15	6	220.13	0.099	No	4	No	7.41
CCC/C=C/[C@@H1](CC(=O)NCC1=CC=C(C)C=C1)C(=O)OCC	True	317.43	3.54	1	3	9	55.4	0.56	No	0	Yes	2.81
C12C(CO[C@H1]O[C@H1](C)[C@@H1](OCCCCCCCCCCCCCCCCC)C[C@@H1]1)OCCC2C=3C=CC(=O)OC=3C	True	574.84	8.84	0	6	18	67.13	0.163	No	2	No	5.16
O1C(=O)N1C[C@@H1]2C[C@]2(CC3=CC=CC(Cl)=C3)C(=O)NCCC	True	322.79	2.78	1	3	7	61.71	0.785	No	0	Yes	3.71
O1[C@](C=CC=C[C@@H1]1)=S	True	125.17	1.62	0	2	0	9.23	0.455	No	0	Yes	4.54
N1C=NN=C1C23CCCC2CC3	True	163.22	1.64	1	2	1	41.57	0.683	No	0	Yes	4.28
O1[C@H1]CC[C@H1]C2/C=C\C=C3\C=C\[C@@H1](O)C4CC5=CC=CO[C@@]5OC=C4[C@@]3(C)CCC(=O)C=C12	True	445.54	5.33	1	5	0	64.99	0.546	No	1	No	6.25
O1[C@@H1]O[C@@H1]CCN(C(=O)[C@@H1](N)[C@H1](O)C2CCC2)CC[C@@H1]1C(=O)C[C@@H1]O	True	355.41	0.27	3	7	6	122.32	0.625	No	0	Yes	5.33
O1C=NC(N)=C(Cl)C1=NC2CCOCC2	True	229.67	0.99	1	5	1	73.64	0.78	No	0	Yes	3.56
COC(=O)/C=C/C=C/C=C/C=CC1=CC=CC=C1O	True	256.3	3.25	1	3	5	46.53	0.499	No	0	Yes	2.72
C[C@H1]OC(=O)C[C@@](O)O[C@H1][C@H1](N1C=C(C)C(=O)[NH1]C1=O)O[C@@H1]COP(=O)(S)O[C@H1][C@H1](O)[C@@H1](N)C[C@@H1]O[C@@H1]O[C@H1](CO)[C@H1]O[C@H1]O[C@H1](CO)[C@@H1]O[C@@H1]2O[C@H1](COC(=O)C3=CC=CC([N+1](=O)[O-1])=C3)[C@H1](O)[C@H1]2OC	True	1052.91	0.38	8	27	37	396.37	0.011	No	3	No	7.31
O1C(=O)C=C(O)C(CCC(=O)OC2=CC=C(O)C=C2O)=C1OO	True	324.24	1.15	4	9	5	146.66	0.275	No	0	Yes	2.99
C1N(C2=CC=C(C(F)(F)F)C=C2)[C@@H1](C(=O)NC3CCCCC3)N1C(=O)NC4=CC=CC(Cl)=C4	True	480.92	5.45	2	3	4	64.68	0.612	No	1	No	3.05
C=1OC(=O)[C@H1](O)[C@H1]C(=O)OCC[C@@](C)[C@@H1](C)[C@](C)OOCCC=1C	True	341.38	2.07	1	7	0	91.29	0.532	No	0	Yes	5.42
O1[C@]C[C@H1]1[C@@H1](CO2)N(C)[C@H1]2	True	140.16	0.26	0	3	1	21.7	0.521	No	0	Yes	5.95
C12OC3=CC=C(CC34[C@@H1]C5[C@@H1]C6[C@H1](O)CCCC6C[C@H1]4C5CCC1)O2	True	340.46	4.15	1	3	0	38.69	0.72	No	0	Yes	7.95
O1N/C(=N\C2=CC=CC=C2)NC[C@H1]1NC(=O)OCC3=CC=CC=C3	True	326.36	2.05	3	4	4	83.98	0.801	No	0	Yes	3.37
O[C@](O)(CS1SC=N[NH1]1)C2=CC=CC=C2	True	244.34	0.93	4	5	3	64.85	0.363	No	0	Yes	4.58
O1C=CC=C(NCC2=NC=C(O)C=C2Cl)C=C1NCC3=CC=CC=C3	True	355.83	3.59	3	5	6	66.41	0.739	No	0	Yes	3.22
C1N(C2=CC=C(C(F)(F)F)C=C2)C3=CC=CC=C31	True	249.24	4.36	0	1	1	3.24	0.726	No	0	Yes	1.9
C12N(C)C(=O)CC=C(/C=C/C3=CC=C(C)C=C3CCCCCCCCCC[C@@H1](O)CC4C=CC=C(F)C(I)=C4)OCOCCO[C@@H1]1CO2	True	777.76	8.65	1	6	15	77.46	0.142	No	2	No	5.47
C1CCCCCC[C@H1](O)[C@@H1]2OC=C(O)C(O)=C2O[C@@H1]O[C@H1](O[C@H1]3O[C@H1](CO)[C@@H1](O)[C@H1](O)[C@H1]3)O[C@H1](C)[C@H1]1	True	517.55	1.36	6	12	3	176.76	0.317	No	3	No	6.22
C12[S+1]([O-1])C=CC3=C[C@@H1]1C4=CC=CC(SC)=C4CCN32	True	289.43	2.85	0	3	1	26.3	0.587	No	0	Yes	5.92
O1C=NN=C(C2=CC=C(OC3=CC=CC=C3)C=C2)N1	True	253.26	2.7	1	5	3	55.21	0.915	No	0	Yes	2.7
COC(=O)C=C(COC(=O)/C=C(/C)C(N)=[N+1]=[N-1])OC(C)=O	True	297.27	-0.32	1	6	6	141.32	0.103	Yes	0	Yes	3.64
C12N(C[C@@H1]C(N=C=S)[C@@H1]1OCC[N+1](C)(C)CCC=CC=CC([N+1](=O)[O-1])=C)[C@H1]2C[C@@H1](OC(C)=O)[C@H1](C)CC	True	534.72	3.85	0	8	16	94.04	0.043	No	1	No	5.91
C1N(C)C=NC2=C(N=CN2CC(=O)NCCN(C)CC3=CC=C(OC)C(O)=C3)O1	True	402.46	0.79	2	9	8	104.45	0.673	No	0	Yes	3.17
O1C2=C3C=CC4=C2[C@@]1C[C@@H1][C@@H1](C5)[C@H1](CC[C@]34C)[C@@]6(C)CC[C@@H1](O)C(C)(C)[C@@H1]6CC5	True	392.58	6.3	1	2	0	29.46	0.524	No	1	No	6.72
C=1NN=C(C2=CC=CC(NS(C)(=O)=O)=C2C)CN=NC(=O)N=1	True	322.35	1.27	2	6	3	124.71	0.869	No	0	Yes	3.98
C12NC[C@@H1](N)CNC=NC1(C(=O)N3[C@@H1]CCNC(=O)CC[C@H1](N)CC(=O)N[C@H1](CC#C)C[C@H1](O)CP(=O)(O)OC[C@H1]O[C@@H1](N4C=C(F)C(=O)[NH1]C4=O)C[C@@H1])OP(O)(=S)OC2N3	True	921.84	-3.37	11	19	22	348.54	0.031	No	3	No	6.05
C12[C@@]CC=C[C@H1](C)C(=O)O[C@@H1]1[C@@H1]2	True	163.2	1.41	0	2	0	26.3	0.398	No	0	Yes	6.14
O1[C@@H1]O[C@@H1]2C(O)=CC(F)=CC2=CC[C@@]1CC[C@](C)C(=O)O	True	295.29	3.14	2	4	4	75.99	0.833	No	0	Yes	5
O1[C@](O)[C@H1](CO[C@@H1](C)C2(C)OC2)O[C@H1]1[C@H1](C)[C@@H1](O)[C@](C)O	True	304.34	0.71	3	7	7	100.91	0.595	No	0	Yes	5.57
O/N=C/C1CCCCC1=O	True	141.17	1.21	1	3	1	49.66	0.339	No	0	Yes	3.63
C1OC2=CC(N)=C(N[C@H1]3COCC3)C=C12	True	206.24	1.36	2	4	2	56.51	0.717	Yes	0	Yes	3.11
C1OC=CC(CCNCCC(CNC(=O)C(=O)NCC=C(C)C)C(=O)OCCCNC=O)C2=CC3=CC=CC(=O)C3=CC=C2O1	True	622.72	1.98	4	9	16	161.16	0.072	No	1	No	4.38
COC=CC(/C=C/C1=CC2=CC(=C1)CCN(C(C)(C)C=O)C2)=O	True	313.4	2.76	0	4	6	46.61	0.46	No	0	Yes	4.47
FSC1=CC=CN=C1C	True	143.19	2.37	0	2	1	12.89	0.598	No	0	Yes	2.84
O1C2=CC=C(OCC3=CSC=N3)C=C2C=CC=C1	True	257.31	3.64	0	4	3	31.35	0.841	No	0	Yes	2.87
N12C(=O)[C@@](O)CCN[C@@H1]1C=C3C=C4C=C(C(=O)O)C=CC=C4NC3=C2	True	338.34	0.81	4	5	1	101.9	0.564	No	0	Yes	4.85
C1CC(=O)[C@@H1]2O[C@@H1]2C1	True	112.13	0.51	0	2	0	29.6	0.427	No	0	Yes	3.58
CN(C)CC1=CC=CC(Cl)=C1OC	True	199.68	2.41	0	2	3	12.47	0.742	No	0	Yes	1.89
C1N(C)C(=O)C=C1NC2=CC=C(F)C=C2C=CC(N)=NO	True	290.3	1.35	3	4	4	90.95	0.338	No	0	Yes	3.3
C1OC=NC=NC(NCCCN2N=C(C3=CC=C(Cl)C=C3)N=N2)=C1C(COP(=O)(O)OP(=O)(O)O[C@@H1][C@H1](O)[C@@H1](O)[C@@H1](O)[C@@H1]O[C@@H1]O[C@@H1](CN)C[C@@H1])O	True	796.04	-0.13	8	20	24	317.27	0.051	No	3	No	6.28
CS(=O)(=O)N1CCN(S(=O)(=O)C=CC2=CC=CN=C2)CC1	True	331.42	-0.04	0	5	4	87.65	0.772	No	0	Yes	2.43
C1N(C/C=C/C(=O)NCC2=CC=C(C#N)C=C2)[C@@H1]3CCCCC3CC[C@H1]1CN4CCCCC4	True	448.66	4.49	1	4	7	59.37	0.625	No	0	Yes	3.53
C12OC(=O)C(C(F)(F)F)=C1[C@@]C3C[C@@H1][C@H1]([C@H1](OC(C)=O)C[C@]23)C(=O)O[C@@H1]OC(C)(C)O[C@H1]4CO4	True	487.4	2.39	0	9	7	109.89	0.231	No	0	Yes	5.98
C12C=3OC=CC=3CC[C@H1]C=C2[C@@H1](O)[C@H1]C(=O)O[C@H1]1	True	245.25	1.72	1	4	0	59.67	0.707	No	0	Yes	5.17
COC(=O)C=CC=CC[C@H1][C@@H1](CC1=CC=CC=C1)CNCC	True	300.42	3.33	1	3	10	38.33	0.409	No	0	Yes	3.4
O1[C@@H1]C=C[C@@H1](C23[C@@H1]O[C@](C4[C@@H1](C)[C@@H1](C#N)O[C@H1](C)C[C@H1](C)O4)[C@@H1]2CC[C@@]3)CCOO[C@]1C	True	443.54	4.51	0	7	2	79.17	0.581	No	0	Yes	6.94
C1C(=O)NC2=C1C=NN2C3=CC=CC=C3	True	199.21	1.37	1	3	1	46.92	0.753	No	0	Yes	2.44
C1C(=O)NCC2C=C(CN[C@H1](CC(=O)N3CCCCC3)[C@@H1](O)C4=CC=C(C=C4)OC5=CC=C(C=C5)C1NC2)C(=O)NCCN6CCOCC6	True	674.84	2.03	5	9	6	144.5	0.311	No	1	No	6.36
N[C@H1]1C2C(=O)N1CCC3=CN(C4=CC=C(F)C=C4)C(=O)C32	True	287.29	0.82	1	3	1	66.64	0.778	No	0	Yes	4.78
C[C@H1](OC(=O)N1CCCC[C@H1](N)C(=O)N[C@H1]C(=O)N[C@@H1](C(N)=O)C(=O)N[C@H1]C(=O)N[C@H1](C(=O)O[C@H1](C)C2=CC=C(O)C=C2)C(=O)N[C@@H1](CC(N)=O)C(=O)N1C(=O)N[C@@H1](CC(N)=O)C(=O)NCC(=O)N3C)CC[C@H1]3C	True	1045.03	-5.84	12	18	8	475.68	0.085	No	3	No	6.82
C1[C@H1]O[C@@H1][C@H1](O[C@H1][C@H1](OC(=O)[C@]C2CC(C(=O)O)C[C@@H1]2C(=O)[C@@H1](O)[C@@H1](NC(=O)OC(C)(C)C)[C@H1]C)C[C@@H1](C)/C=C/C(=O)O)C=C1	True	633.69	3.27	4	10	16	194.99	0.11	No	1	No	6.16
O1/N=C/C(C2OC(=O)NC2=O)O[C@H1]1[C@H1](O)[C@H1]O[C@H1](C)[C@@H1](OC(C)=O)[C@H1](OC(C)=O)[C@H1]O	True	446.37	-1.33	3	13	10	188.51	0.265	No	1	No	5.73
C1OCC(=O)NC23[C@@H1][C@@H1]1CC2C3=O	True	180.18	-0.71	1	3	0	55.4	0.536	No	0	Yes	6.21
O1C[C@H1]CN(C2CC[C@@H1](O)CC2)CCCN(C(=O)NCCCC(=O)NCCOCCOCCOCCOCCCNCCOCC1)[C@@H1]C	True	687.92	1.37	4	11	2	152.32	0.333	No	2	No	4.32
CC(O[C@@H1]1O[C@@H1](C)[C@H1](CO)[C@@H1](O)[C@H1]1)O[C@@H1](C)/C=C(\C2)[C@H1](O3)[C@H1](C)[C@@H1](O)CC(C)CCC(C)C(=O)C(O)C(C)COC(O)C=CC(O)=C(C(O)CC=C)C(OS(=O)(=O)C(C)CC)=C(O)C(=CC3)OC2	True	988.22	4.86	8	18	13	277.66	0.069	No	3	No	6.66
CN(C1=CC=C(N2CCCC2)C=C1C)C(=O)OC(C)(C)C	True	290.41	3.97	0	3	2	32.78	0.826	Yes	0	Yes	2.16
C12C(=O)NCC=C(C(=O)NCC3=CC=C(Cl)C=C3)N(CCC=CC4=NC=C[NH1]4)C(=O)C1C2F	True	471.92	2.21	3	4	7	107.19	0.575	No	0	Yes	4.77
FC(O)C=CC=CC(C1=CC=CC=C1/C=C/C(=O)N[C@H1](C)C(=O)OCCN)=N	True	389.43	1.47	4	6	10	125.5	0.209	No	0	Yes	3.95
CN(C(=O)CCC1=NC(CO)=CC=C1)CC(C)C	True	250.34	1.62	1	3	6	53.43	0.834	No	0	Yes	2.34
BrC=CC=C[C@@H1]CN1C[C@@H1](C(C)(C)C)O[C@@H1]1CNC(=O)[C@H1]([C@H1](O)[C@@H1](O)[C@@H1](O)C(=O)O)NC(=O)[C@](CO[C@@H1](C2=CC=C(O)C=C2)NC=O)C(F)CO	True	789.65	-0.43	9	12	21	247.45	0.044	No	3	No	5.95
CN(CCC1=CC=C(/C=C/C2=CC=CC=C2)C=C1OC)C(=O)OC3=CC=CC=C3[N+1]CCCCC	True	471.62	6.97	0	3	12	52.87	0.212	No	1	No	2.86
O1[C@@H1][C@@H1]1O[C@H1]C[C@](C2)(O)[C@@H1](OC(=O)/C=C\C=C\[C@H1]CCCCNC[C@H1](C)OCO)[C@@](C)C[C@@H1](C)[C@H1](OC)[C@H1](C)CC[C@@H1](C)C[C@H1]2	True	634.88	5.83	3	9	18	119.01	0.043	No	2	No	6.46
C1OC=CC=C(C(=O)O)C=C1	True	152.15	1.1	1	2	1	46.53	0.612	No	0	Yes	3.69
FC1=CC=CC=C1[C@H1]C=C(C2CC2)ON=NC=NC3=CC=CC=C3	True	322.36	5.42	0	3	7	46.31	0.221	Yes	1	No	3.47
C1N(C2=CC=CC(C(F)(F)F)=C2)[C@@H1](C)CNC=C(C(F)(F)F)C(C3=CC=CC=C3C4=CC=NC=N4)NC5C=CC=CC(OCCCN(C)C)=C15	True	698.76	7.45	2	7	8	65.55	0.187	No	2	No	5.21
C1N(C(C2=CC=CC=C2)C3=CC=CC=C3Cl)OC1	True	259.74	3.68	0	2	3	12.47	0.834	No	0	Yes	2.7
C1[C@@H1]O[C@@H1]O[C@H1](C2OC(=O)CCCCC[N+1]=3C=CSC=31)CO[C@@H1](CO[C@@H1]4O[C@H1](CO)[C@@H1](O)[C@H1](O)[C@H1]4O[C@@H1]5O[C@@H1](C)[C@H1](O[C@@H1]6O[C@H1](CN)[C@@H1](O)[C@H1]6O)[C@@H1](O)[C@@H1]5)OO[C@@H1]2CO[C@H1]O[C@@H1]O[C@H1](CO)[C@@H1](O)[C@H1]OP=O	True	1076	-3.24	9	28	21	373.56	0.019	No	3	No	6.04
C=1C2[C@](N)CC(=O)OC[C@@]2=1	True	138.15	-0.02	1	3	0	52.32	0.378	No	0	Yes	4.55
C[C@@H1](NC(=O)CNC(=O)[C@H1](CC1=CC=C(O)C=C1)NC(=O)[C@H1](CCC2=CC=CC=C2)NC(=O)CNC(=O)[C@@H1](CO)NC(=O)[C@H1](CCCCN)NC(=O)[C@H1](CC3=CC=C(O)C=C3)NC(=O)[C@H1]C(C)C)NC(=O)[C@H1](C)NC(=O)[C@H1]	True	1071.22	-2.05	14	14	32	377.71	0.024	No	3	No	5.47
CC1CN(CCCN(C)CC2=CC=CC=C2)CC1	True	246.4	2.85	0	2	6	6.48	0.761	No	0	Yes	2.25
CC(=NCCCN(C)CC)CC[C@H1]([C@H1](OC)C(Br)Cl)Cl	True	390.19	4.15	0	3	11	24.83	0.301	No	0	Yes	4.44
C12N(C3=CC=C(C(F)(F)F)C=C3)C=CC(C4=CC(F)=C(O)C(O)=C4)=CC1=C2C#N	True	400.33	4.88	2	4	2	67.49	0.557	Yes	0	Yes	3.7
OC/C=C\C=C\[C@@H1](N)CC(N)=O	True	170.21	-0.71	3	3	5	89.34	0.476	No	0	Yes	3.82
C[C@@H1]OC(=O)NCCCCCCCCCCCNC(=O)C=NC(NC(=O)[C@H1](C)NC(=O)[C@@H1]1CCCN1C(=O)CCCCNC(=O)C2=CC=C3C(=C2)C(=O)C4=CC=CC=C43)CCOC=CC=CCC=CCC(=O)N[C@@H1]CC=CC=CC=C	True	1113.41	9.12	6	11	39	242.8	0.01	No	4	No	5.77
C12[C@@H1]C=CC(CCCCC)=C2O[C@@H1]O[C@H1](CO[C@@H1]O[C@H1](CO)[C@@H1]O[C@@H1]3O[C@@H1](C)[C@@H1](O)[C@H1](O)[C@H1]3)O[C@H1]O[C@@H1](O)[C@H1](O)[C@H1]1O[C@H1](O)[C@H1](O)[C@H1]	True	674.69	-0.33	7	16	16	224.68	0.082	No	3	No	7.48
O1C2=NC(NC3CCCCC3)=NC=C21	True	191.23	2.33	1	4	2	50.34	0.74	No	0	Yes	2.68
O1[C@@H1][C@@H1]CCCCC[C@](C)[C@@H1]([C@@H1]1CC=CC=C(OC(=O)C2=CC=CC=C2)N=C)NOCO	True	441.55	4.48	2	7	9	89.38	0.147	No	0	Yes	5.28
C1N(CC=2C=CSC=2CCC)CC[C@H1]1C	True	223.38	3.54	0	2	4	3.24	0.754	No	0	Yes	2.84
C12N(C3C=CC=C(N4C=CC=C4)C=C3)CC5=CC6=NN(C)CC=C(C(I)=C6)C(O)=C5C[C@H1](C)C[C@]1(O2)CCN(CC7=CC=CC=C7)C[C@H1]CNC8=CC=CC(O)=C8C=C(F)C=CC[C@@H1]CC(=O)[C@@H1](O)[C@]	True	1056.05	10.23	4	11	19	129.33	0.04	No	3	No	7.78
CC(N1CCN(CC2=CC=CC=C2)CCC1)C(=O)NS(=O)(=O)C(F)(F)F	True	393.43	1.55	1	5	5	69.72	0.822	No	0	Yes	2.72
C=1C(C2=CC=C(C3CCCCC3)C=C2)=C(Cl)NC=1[C@@H1](N)CC4=CC=CC=C4	True	378.95	6.63	2	1	5	41.81	0.514	No	1	No	2.9
C[C@@H1](C[C@H1](O1)C(=O)N2CCCC[C@H1]2C(=O)OC3OCCN(C)C31)C(=O)OC(CCCCC)C(O)CC	True	512.64	2.21	1	9	10	114.84	0.347	No	1	No	5.21
C=1N(C)C=NC=C(C(=O)NS(=O)(=O)C(C)C)N2N=C(NC(=O)C3=CC=CC=C3)N=NC=12	True	444.48	0.7	2	10	5	153.24	0.583	No	0	Yes	2.92
O1[C@@H1]2CC[C@@H1]3C[C@@H1](O)CC[C@]3(C)[C@H1]2CC[C@]1C	True	237.36	3.29	1	2	0	29.46	0.7	No	0	Yes	4.24
CN1CCN(CCCCN2C=CC3=CC=C4C=CC=CC4=C32)C[C@H1]1C(=O)O	True	365.48	3.28	1	4	6	48.71	0.681	No	0	Yes	2.89
C1C(O)C=C2C3=CCN=C(N)C=4C(=O)NC(=CC=43)[C@@H1]2CC1=O	True	297.31	0.22	3	5	0	108.54	0.636	No	0	Yes	5.38
C1S(=O)(=O)C=NN=C(C2=CC=C(Cl)C=C2)N1	True	257.7	1.01	1	5	1	70.89	0.816	No	0	Yes	3.42
C1OC2=CC=C(C=O)C(O)=C2CC(=O)/C=C/C=C\C=C\1	True	270.28	2.38	1	4	1	63.6	0.796	No	0	Yes	3.62
O1[C@H1]COC(=O)CC/C=C/[C@@H1]2O[C@]2(C)C1C[C@@H1][C@@H1]	True	250.29	1.89	0	4	2	48.06	0.426	No	0	Yes	5.8
C12OCOC(CO)[C@@H1](O[C@@H1]3O[C@H1](CO)[C@H1](O)[C@H1](O)[C@H1]3O)[C@H1]1O[C@@H1](C)CC[C@@H1](C)[C@H1](O)[C@@H1](C)/C=C(\C)OC(=O)/C=C/C(C=O)=C(\C)[C@@H1]2O	True	674.74	-1.01	7	15	5	231.13	0.137	No	3	No	6.26
C1N(CC2CCC(C)CC2)C[C@@H1][C@@](C)CC[C@](C)([C@H1](O)COCC=3[NH1]C=NC=3CCCCCN)C(=O)CN[C@@H1]1COC(C)C	True	617.92	4.64	4	8	15	125.73	0.21	No	1	No	5.38
N[C@@H1](CNC(=O)[C@H1](CS)NC(=O)[C@H1](N)CC1=CC=CC=C1CP)C=O	True	384.44	-1.01	5	6	10	127.31	0.201	No	0	Yes	4.03
CN(C1CNC=CC2=NCCC(C1)C2(C)C)C(C)CC3=CC=C(O)C=C3	True	355.53	3.62	2	4	4	47.86	0.867	No	0	Yes	5.45
C1[C@H1](O[C@@H1][C@@H1](OC(C)=O)C[C@@H1]1CO[C@@H1]O[C@H1](CO)[C@@H1](O[C@@H1]2O[C@H1](CO)[C@H1](O)[C@H1](O)[C@H1]2NC(C)=O)O[C@H1](CCNC(=O)/C=C/C3=CC=C(C4=CC=CC=C4)C=C3)[C@H1](F)[C@H1])C=O	True	844.88	1.19	6	15	22	237.87	0.032	No	3	No	6.1
FC=CC=CC1=CC=C2C=C3C=CC2=C1[C@@H1][C@@H1]3O	True	239.27	3.94	1	1	2	20.23	0.787	No	0	Yes	4.89
CCC(=O)NC=CC(C=CC=CC(=O)N[C@@H1](CC1=CC=C(O)C=C1)C=NC(CCCCC=C(C2=CC=C(Br)C=C2)[NH1]C3=CC(O)=CC=C3)CNC)C=CC=C	True	808.86	8.77	6	7	23	135.08	0.025	No	3	No	5.09
C12C(CCCC=CC=C(OC(=O)CCC(C)CCCC(C)CCCOC(=O)C(C)CCCC3NC3C(C)C4=CC(OC)=CC=C4)OC([N+1](=O)[O-1])=C1)C=C2OC(=O)CCCCCCCCCCCC	True	947.31	13.74	1	11	33	162.44	0.018	No	3	No	6.29
CN(C1=CC=C(C)C(F)=C1C(C)CCC)CCC	True	251.39	4.88	0	1	6	3.24	0.696	No	0	Yes	2.99
CN(CC1CCCCC1)C(=O)CCl	True	203.71	2.26	0	1	3	20.31	0.645	No	0	Yes	2.19
C1OC(=O)/C=C/[C@H1](C2)O[C@@H1](O[C@@H1]O[C@H1](C)[C@@H1](O)[C@H1]2N(N)C[C@H1])O[C@@H1](O)[C@@H1]1OCC3=CC=CC=C3	True	479.51	0.25	3	11	5	142.17	0.304	No	1	No	6.6
C1N(C2=C(NCCO)N(C)C(=O)[C@H1]2CF)C3=CC=CC(Cl)=C3C1=O	True	353.78	1.15	2	5	5	72.88	0.831	No	0	Yes	3.89
C=1NN=C(CCC2=CC=CC=C2F)C=CC=CC=1	True	242.3	3.46	1	1	3	28.68	0.877	No	0	Yes	2.69
C1[C@H1]O[C@@H1][C@H1]O[C@@H1]CC[C@H1][C@H1](C)CCC[C@](COC(C)=O)[C@@H1]1OC(=O)CCC(=O)O[C@H1]C2[C@H1]O[C@H1]C[C@](C)C[C@H1]C(=O)C3C4[C@](C)[C@@H1](C(=O)N5CCC5)C[C@H1]4[C@](C)(CO)C3=C(O)CCC[C@@]2C[C@H1]	True	945.18	8.88	2	13	11	184.43	0.148	No	3	No	7.68
O1C[C@H1]CN(CC(=O)NC2=CC=C(Cl)C=C2)C(=O)N[C@@H1](CC(N)=O)C(=O)NC[C@@H1](C(N)=O)NC(=O)C(N)C(O)COC[C@H1](N)C(=O)N1C(=O)O	True	730.11	-4.69	10	13	6	354.16	0.132	No	3	No	5.55
C=1OC2=CC(O)=CC=C2[C@@]=1OC(=O)C3=CC=CC=C3C=O	True	282.25	3.17	1	5	3	76.74	0.589	No	0	Yes	2.39
CS(=O)(=O)C1=CC=C2C=CC=NC2=C1CNC(=O)CN3CCOCC3	True	363.44	0.59	1	6	5	88.6	0.836	No	0	Yes	2.34
C[C@H1]CNCC1=CC(C)=CC2(/C=C/C=C/C=C/CCSCCCC(=O)NC=N)C=CC=C1[NH1]C2=O	True	493.7	4.54	4	5	15	94.08	0.117	No	0	Yes	5.68
O1C=NC2=CC=CC=C2C1[C@@]	True	144.15	2.01	0	2	0	21.59	0.545	No	0	Yes	4.16
C1N(C)C=NC(CC=C2[NH1]C(=O)[NH1]C(=N2)O)C3=CC=CC=C31	True	299.33	1.66	3	4	2	89.32	0.776	No	0	Yes	4.25
COC(=O)CCCCCCCCCCCC	True	228.38	4.47	0	2	11	26.3	0.385	No	0	Yes	1.66
C1C(=O)NC=C2C(C3=NC=C(OC(C)C)C=N3)=CC=C12	True	269.3	1.99	1	4	3	64.11	0.911	No	0	Yes	3.4
C12C(O)C3=CC(=CC(OC(=O)CCC(=O)O)=C3C1C)C2=O	True	290.27	1.42	2	5	4	100.9	0.642	No	0	Yes	4.68
C1N(C2=CC=C(C#N)C=C2C(F)(F)F)[C@H1](C3=CC=CC=N3)C1	True	303.29	3.92	0	3	2	39.92	0.844	No	0	Yes	2.96
C1C(OC)C2C3[C@@](CCC[C@@H1]31)[C@H1]CC[C@H1]4O[C@]42	True	233.33	2.94	0	2	1	21.76	0.649	No	0	Yes	5.28
O1C=CC=C(CO)C=C1C(O)=CC(C)C	True	208.26	2.43	2	3	3	49.69	0.7	No	0	Yes	3.97
C=1[C@H1]O[C@@H1][C@@H1]2OC3[C@](CC4[C@@](C)[C@@H1]3C[C@@H1](O)[C@](C)[C@@H1][C@H1](C)CC[C@H1](OC(C)=O)C(=O)[C@@]5(O)CCC5)O[C@@](CO)C[C@@H1]4C[C@@H1]2C[C@H1]=1	True	627.8	4.77	3	9	12	131.75	0.262	No	1	No	7.88
CC(C[C@H1](O)C(C)(C)[C@@H1](O)CC)=O	True	188.27	1.12	2	3	5	57.53	0.68	No	0	Yes	3.78
NC(=O)N([C@H1](C(O)C)NC(=O)[C@@H1]1CCCN1C(=O)[C@@H1](N)C2CC[C@H1][C@H1]2C(=O)NCC(C)(C)C3=CC=CC4=C3)CC5[C@H1]4C(=O)NCCC6=CC=CC=C6C7=CC=CC=C75	True	790.99	3.05	6	7	1	200.19	0.218	No	2	No	6.6
C1C(C[C@@H1](CCCCCC(OC(=O)C(C)C)C(C)(C)O[C@H1])CCOCC=C1N)(C)C	True	423.64	5.65	1	5	10	70.78	0.363	No	1	No	4.79
O1[C@@H1]O[C@@](C)(O)[C@H1]1CO[C@H1]O[C@H1](CO)[C@@H1](O)[C@H1](O)[C@H1]	True	278.26	-1.82	4	8	8	117.84	0.383	No	0	Yes	6.03
C1[C@@H1](C(=O)N(C(C)=O)C[C@H1]2CCCN2C(=O)OC)C[C@H1]1C3=CC=C(C(C)C)C=C3	True	400.52	3.91	0	4	5	66.92	0.752	No	0	Yes	3.15
O1C=NN=CC1(C=C(CCCC2CCCCC2)N3C=CN=C3Cl)C(=O)N	True	377.88	3.4	1	6	7	94.86	0.788	No	0	Yes	4.43
CN(CC1=CC=CC=C1C2=CC3=CC=CC=C3[NH1]2)C(=O)O	True	280.33	3.94	2	1	3	56.33	0.763	No	0	Yes	2.16
C1N(CCO)CC=C(CC2=CC=NC=C2CC)ON(CC3=CC(Cl)=CC=C3Cl)C1=O	True	450.37	3.65	1	5	7	65.9	0.698	No	0	Yes	3.25
O1C/C=C/C=C(C(=O)[O-1])SCC(=O)N(C(=O)O[C@H1](C)CC(=O)O1)OCC=CC(OCC)C=C	True	484.5	1.22	0	11	8	140.73	0.363	No	1	No	5.66
C1N(C=O)C2=CC=CC=C12	True	133.15	1.16	0	1	1	20.31	0.526	No	0	Yes	2.53
CN(C)C(=O)CC1CNCCN(C2=C(F)C=CC=C2C(=O)NC3=CC=C4C(Cl)=CC=CC4=C3)C[C@H1]1C(=O)NCC5=CC=C(CP(=O)(O)O)C=C5	True	724.17	5	5	6	10	151.31	0.144	No	1	No	3.93
O1C=CC=C(OCCC2=NC=CC3=C12)C=CCCC3C4=CC=C(O)C=C4	True	347.41	4.62	1	4	1	51.58	0.818	No	0	Yes	5.3
C1C(=O)O[C@H1][C@H1](OC(=O)CC2=CC=C(O)C=C2)[C@@H1]([C@H1](C)OC(=O)CCC)C[C@@](C)(O)[C@@](C)(O)C(=O)[C@H1]1OC(=O)C3=CC=CC=C3	True	627.66	2.99	3	12	9	182.96	0.273	No	2	No	5.23
C1C(=O)NC[C@H1]CN2C(=S)NC=CC=CC3=CC4=CC(=C3O)C(=O)C5=C(C(=O)[O-1])C(O)=C(C)C(O)=C5[C@](C(=O)OC)C(=O)C6=CC=C(O)C(=N6)C=C4C=C2O1	True	765.73	1.62	6	15	2	253.43	0.125	No	3	No	6.23
C1[C@H1]O[C@@H1][C@@H1](OC(C2)=O)C[C@@H1](O[C@H1][C@](C)O[C@H1](C)[C@@H1](O[C@H1]C[C@@](C)(COC(N)=O)C(C)C[C@H1])O[C@](C)(O)C[C@@H1](C)CN(C)[C@H1](C)[C@@H1](O)[C@]1(C)OC)CC2(C)CC=C	True	810.06	6.48	3	13	11	177.7	0.153	No	3	No	5.76
CC(CCCCCCCCOC(CO)CC(C)(C)OO)C(=O)C(C)C	True	360.54	4.61	2	5	16	75.99	0.239	No	0	Yes	3.74
O1C=N[NH1]C1(C2=CC3=C([NH1]C4=CN=CC=C43)C(F)=C2F)O	True	290.23	1.66	3	5	1	82.53	0.636	No	0	Yes	4.1
C1N(C2=CC=CC(C(F)(F)F)=C2)C[C@H1]1C3=CC=C(F)C=C3	True	295.28	4.45	0	1	2	3.24	0.74	No	0	Yes	1.96
CN(C1=CC=C(O[C@H1]2CCCNC2)C=C1)CCSC(=O)[C@@H1](C)N	True	337.49	1.86	2	6	7	67.59	0.792	Yes	0	Yes	3.45
C1[C@H1]O[C@@H1]O[C@H1](C)[C@H1](O)[C@H1]O[C@H1][C@@H1](O)[C@@H1](O2)[C@@](O)C(O[C@H1]3O[C@H1](COS(=O)=O)O[C@@H1](O)[C@H1](O)[C@H1]3OP(=O)O)O[C@H1](O)[C@@H1]2O[C@H1](O)[C@H1](O)[C@@H1]1O[C@H1](O)[C@H1]O[C@@H1]4O[C@H1](C)C[C@H1](N)[C@H1]4O[C@H1]O[C@H1]CN	True	1020.86	-6.17	13	30	17	453.23	0.028	No	3	No	8.24
[O-1][S+1]([O-1])C=1N=C(N)SC=1	True	163.2	-0.04	1	5	1	85.03	0.589	No	0	Yes	4.74
C1C(C(=O)OCCOC=2C=CNCC3=CC=CC(C(F)(F)F)[NH1]3)C=2[N+1]1[O-1]	True	372.32	1.12	2	7	4	88.55	0.437	No	0	Yes	5.19
O1CCNCS1(=O)=O	True	137.16	-1.11	1	4	0	55.4	0.43	No	0	Yes	4.33
C1[C@@H1](NC(=O)[C@H1](CCCCN)NC(=O)[C@H1](CCSC)NC(=O)[C@H1](CCC(N)=O)NC(=O)[C@H1](CC(C)C)NC(=O)[C@@H1](CC2=CC=CC=C2)NC(=O)[C@H1](CCC(N)=O)NC(=O)[C@H1]CC(N)=O)NC1=O	True	960.15	-3.36	12	13	33	388.09	0.024	No	3	No	5.16
O1[C@]CC(C1C(I)I)Br	True	414.81	2.77	0	1	1	9.23	0.473	No	0	Yes	6.3
C12[C@@H1](C[C@H1](C)CC/C(C)=C/C=C/[C@@H1](CO)COCCO1)CC[C@@H1]2O	True	338.49	3.09	2	4	1	58.92	0.771	No	0	Yes	4.84
C=[C@@H1]CCCC[C@H1](O1)[C@@H1]CC[C@H1]2[C@H1][C@H1]3[C@H1]1CC4[C@@]3C[C@]24OCO	True	317.45	3.64	1	3	7	38.69	0.443	No	0	Yes	7.17
C1CO/N=C(\C)C(=O)C2=CC=C(C3=CC=CC=C3)OC(=O)C2=C1C	True	323.35	3.19	0	5	1	64.96	0.745	No	0	Yes	3.76
C1CC/C1=N\N	True	84.12	0.49	1	2	0	38.38	0.336	No	0	Yes	3.24
CC(=O)NCC(=O)N[C@@H1](CC1=CC=C(O)C(Cl)=C1)C(=O)N[C@H1]C(=O)N[C@@H1](CCCCN)C(=O)N[C@@H1](CCCCN)C(=O)N[C@H1]C(=O)N[C@@H1](CS)C(=O)N[C@@H1](CCCC)C(=O)N[C@@H1](CC2=C[NH1]C3=CC=CC=C23)C(=O)N[C@@H1]	True	1096.71	-0.92	15	14	34	379.06	0.02	No	3	No	5.58
CNC(=O)/C(=N/NC(=O)/C=C/C=C/C=O)OC1=CC=CC=C1	True	301.3	0.55	2	5	5	96.86	0.207	No	0	Yes	3.08
C1N(CC2=NC=CN2C)CC1	True	151.21	0.63	0	3	2	21.06	0.618	No	0	Yes	2.08
OC=N[NH1]C=CC=CC=CC=CC(/C=N/O)C(O1)=C([C@]2(O)C[C@H1]([C@@H1](O)C3=CC(O)=C(O)C=C3OC)C2=O)C(=O)C=CC=C(OC(=O)CCCCC[N+1]4=CC=C(C(F)(F)F)C=C4F)C/N=CC=C1O	True	954.9	5.82	8	16	19	273.5	0.007	Yes	4	No	6.76
C1OC=C(C2=CC=C(C)C=C2O)OC1=O	True	206.2	1.57	1	4	1	55.76	0.708	No	0	Yes	3.03
C1OC2=CC=C(/C=C/CS3C=C(C(=O)[O-1])N=C3O)COC(=O)C[C@H1]12	True	350.37	0.47	2	6	4	108.25	0.563	No	0	Yes	6.08
C1N(C(=O)/C=C/C2=CC=CC=C2C3=CC=CC=C3)[C@@H1](O)C(=O)N4C=CC=C(CCCCCNCCCCCCN=[N+1])[N-1]C(=O)N4C1=O	True	639.76	3.67	2	9	16	162.4	0.137	Yes	1	No	4.46
CC(CCC[C@@H1](O)CCCO)OC	True	190.28	1.32	2	3	8	49.69	0.607	No	0	Yes	3.18
C1OC=CC=C(C2=CC=C(C(F)(F)F)C=C2)[C@H1](C(=O)OCC3=CC=CC=C3C)N1S(=O)(=O)C4=CC=C5C=CC=CC5=C4	True	593.62	6.85	0	5	6	72.91	0.229	No	2	No	3.46
CCC(C1=CC=C(NC(=O)CS2N=C=SC2)C=C1)OOC(=O)C(C)C	True	384.52	3.47	3	5	8	76.99	0.278	No	0	Yes	4.86
C=1N2N=C(C3=CC=C(C(F)(F)F)C=C3)N=C2C(=O)N=1	True	266.18	1.99	0	4	1	60.14	0.793	No	0	Yes	2.94
CNC(CCC1=CC=CC=C1F)C(=O)N(CC(C)C)CC2CCCC(C3CCOCC3)C2	True	446.65	5.06	1	3	10	41.57	0.546	No	1	No	3.64
CN1N=C(C2=NC3=CC=CC=C3S2)NC1=O	True	232.27	1.39	1	5	1	63.57	0.689	No	0	Yes	2.69
O1C=NC(C2=CC=C(OC3CCCCC3)C=C2NC)=NN1	True	288.35	2.66	2	6	4	67.24	0.894	No	0	Yes	3.34
CN(CC1=CC=CC=C1C2=CC=CC=C2F)C(C3=CC=CC=C3)C4=CC=CC=C4	True	381.49	6.71	0	1	6	3.24	0.358	No	1	No	2.01
CO/C(=N\OCC(C)(C)C(F)F)F	True	199.17	2.18	0	3	4	30.82	0.394	No	0	Yes	3.87
CN(CC1=NC=C(C2=CC=CS2)O1)CCS(=O)(=O)C	True	300.41	1.88	0	6	6	63.41	0.815	No	0	Yes	2.61
N12[C@@H1][C@@H1]CC3C4NCCCC[C@H1]1[N+1](C)(C)[C@@H1]4CC[C@]3(O)[C@]2N(C)CCC(C)C	True	390.62	2.59	2	4	4	38.74	0.724	No	0	Yes	7.12
C1N(CC2=CC=C(F)C=C2F)C[C@H1](F)CN(S(C)(F)F)[C@H1]CCN(C3=NC=NC=4[NH1]C=CC3=4)CCNC1	True	544.62	4.46	2	6	4	63.32	0.473	No	1	No	4.35
C[N@+1](O1)C2=CC(=CC=C1OC(C)(C)CC)C(C)(C)C2N=[N+1]=[N-1]	True	304.39	4.28	0	4	4	73.12	0.336	Yes	0	Yes	5.71
CC(O)CC/C(C)=C/C=1OC=C(C)C(=O)C=1	True	222.28	2.51	1	3	4	50.44	0.851	No	0	Yes	3.52
C#CCC/C(=C\C1=CC=C(OC)C(OC)=C1C)C(C)=O	True	272.34	3.4	0	3	6	35.53	0.588	No	0	Yes	2.87
C1OC1CO	True	74.08	-0.62	1	2	1	32.76	0.42	No	0	Yes	3.03
C12C(=O)N(CC3=CC=C(F)C=C3F)C[C@H1]1C=CC=C4C(CC5=CC=C(O)C=C5)=CC=C4OC2=O	True	461.46	4.35	1	4	4	66.84	0.543	No	0	Yes	4.44
O1[C@@H1](CC(O2)C=C3C4=CC=CC=C5C=CC6=C(C=CC=C6N(CC(=O)N7CCOCC7)[C@H1]54)C2=CN1)C3=C	True	495.58	3.66	1	6	2	63.27	0.676	No	0	Yes	6.79
FC(O)CNC(=O)CC1=CC=CC=N1	True	198.2	0.03	2	3	4	62.22	0.717	No	0	Yes	2.78
C1C(C[C@H1][C@H1](C)C(=O)C2C[C@@](C)CCCC(C)(C)C(=O)OC(C)(C)CC2=O)C[C@@H1](O)C[C@@H1]3CC[C@@H1](C)[C@@]1(O)C3=O	True	560.77	5.39	2	7	5	117.97	0.342	No	2	No	6.56
O/N=C1\CN(CC2=CC=C(O)C=C2)S(=O)(=O)C1(C)C	True	284.34	1.15	2	5	2	90.2	0.629	No	0	Yes	3.16
C1N(CCCCC2=CC=CC=C2O)C(=O)[C@@](CC)(CCCC(N)=O)[C@H1]1OC=C3C=C(/C=N/NC4CCCC4)C(OC)=C3	True	578.75	4.87	3	7	16	126.48	0.111	No	1	No	4.52
CN1CCC(NC2CCN(CC3=CC=CC=C3)C2)CC1	True	273.42	1.94	1	3	4	18.51	0.904	No	0	Yes	2.4
CC(C=1OC2=CC=C(Br)C=C2C=1/N=N/C3=CC=C(Cl)C(Cl)=C3C)(O)O	True	444.11	6.38	2	5	3	78.32	0.364	Yes	1	No	3.16
C[C@@H1](C(=O)N1C[C@H1](O)C[C@H1]1C(=O)NC=CC=C(S(=O)(=O)CCCCCCCNC(=S)NC2=CC=CC(=C2)C=C(C(=O)N[C@@H1](CCCCN)NC(=O)OC(C)(C)C)C3=CC)CC=C3)C=C	True	924.24	6.02	7	10	12	221.29	0.055	No	3	No	6.88
N#CNCC1=CC(=O)OC1C(C)(C)C	True	194.23	0.95	1	4	2	62.12	0.404	No	0	Yes	4.17
O1[C@@H1]2CNC3C[C@H1]2C=C1[C@]C4=C[C@@]CC5N6C=C(C(N)=O)C(=O)C=C6[C@H1](COO5)[C@@H1]43	True	407.43	0.87	2	7	1	104.81	0.67	No	0	Yes	7.76
O1C2=NON=C2C[C@@H1]COC(=O)[C@@H1](C)[C@@H1](O)[C@]1C=C[C@@H1](C)COC(C)=O	True	366.37	1.04	1	9	4	120.98	0.779	No	0	Yes	5.47
O/N=C/C1C(=O)C2=CC(Br)=CC=C2O[C@H1]1C3=CC=CC=C3	True	346.18	3.84	1	4	2	58.89	0.511	No	0	Yes	3.39
O1N=CC=CC=C1[C@H1][C@@H1]2NCS[C@@]2(C(=O)O)CC3=CC=CC=C3	True	329.4	2.38	2	5	5	70.92	0.868	No	0	Yes	4.7
C1OC(=O)[C@H1](CO)[C@H1]1O	True	132.11	-1.49	2	4	1	66.76	0.427	No	0	Yes	3.76
CN(C)C=NC(NC=C1C=C(N2CCN(C)CC2)C(C(=O)O)=C1CC=CC=CC=CC3=C)C=CC(Cl)=C3C(=O)[NH1]	True	564.11	3.39	2	6	5	112.28	0.389	No	1	No	5.28
CN(CC1=CC=C(C(=O)N[C@@H1](C)CCC(C)C(=O)O)C=C1CC)CC(=O)O	True	378.47	2.38	3	4	11	106.94	0.546	No	0	Yes	3.08
CC(=O)N1C=CC(C=2C=NN(C)C=2OCCC3=CC=C(Cl)C=C3)=CC1=O	True	371.82	3.18	0	6	5	66.12	0.69	No	0	Yes	2.74
C=12OC=C(C=1CC2C)[C@@H1]3C=CC(=O)[C@]3(OC(=O)C(C)C)C=O	True	302.33	2.3	0	5	4	73.58	0.485	No	0	Yes	4.81
CN(CC1=CC=CC=C1C2=CC=CC=C2)C[C@@H1](C)C3=CC=CC(Br)=C3OCCC(O)CC(O)C([2H])([2H])[2H]	True	529.53	6.25	2	4	13	52.93	0.275	No	2	No	4.25
C1OC2=CC(OC)=C(OC)C(OC)=C21	True	196.2	1.6	0	4	3	36.92	0.735	No	0	Yes	2.29
C1[C@]C(=O)C2=C[C@@H1](C3)[C@@H1](O)[C@@](CC=C(C)C)[C@]3(CC[C@@H1]1C)C(C)(C)[C@@H1]2C=O	True	369.53	4.54	1	3	3	54.37	0.587	No	0	Yes	7.31
CN(CCCCC=C1[NH1]C=CC1C)C(=O)CN2C(C3=CC=C(F)C=C34)=NC=C(N4CCCCCCCC)C(=O)N([C@H1](CCCCN)NC(=O)[C@H1](CC5=CC=CC=C5)NC(=O)[C@H1](CCSC)NC(=O)[C@@H1](N)CSS)C[C@@H1](C(=O)O)NC2=O	True	1179.57	5.61	9	15	33	277.23	0.024	No	4	No	7.21
C=1[C@@H1]C2=C(O)C=CC=C2[C@@]=1CCNC(=O)C3=CC(C(=O)N(C)C4=CC=CC=C4C5=CC=CC=C5)=CC=C3O[C@H1]C6[C@H1](N)C(=O)N(C)C6=O	True	642.71	4.59	3	7	10	142.27	0.215	No	1	No	4.25
C12OC3=CC=C(C=C1O2)CCC4=CC=CC=C43	True	224.26	3.17	0	2	0	21.76	0.631	No	0	Yes	4.62
C1NN=C(C#CCC(=O)NCCC2=CSC(C)=N2)NC(=O)[C@H1](CO)NC(=O)[C@H1](CC3=CC=C(O)C=C3)NC1=O	True	555.62	-1.55	7	10	7	194.14	0.199	No	2	No	4.64
C1COC=C2C(O[C@H1](C)[C@@H1](O)[C@H1](C)O2)=C(O[C@]C=CC(=O)[C@](C3C(C4=CC=CC=C4)C(=O)[C@@](C)(O)C3=O)(C)CC[C@@H1]1[C@@]C)CC(C)=C	True	646.78	5.6	2	9	5	128.59	0.31	No	2	No	6.46
O/N=C1\CCCCN1CCNCCCC2=CC=CC=C2	True	275.4	2.48	2	3	7	47.86	0.456	No	0	Yes	2.39
C1C(=O)NC2=CC(C)=CC=C2[C@@H1]1C	True	175.23	2.44	1	1	0	29.1	0.644	No	0	Yes	2.68
C12N(C/C(C)=C\C=C3\[C@H1]C(C)C[C@H1](O)C34)[C@H1]CC[C@H1]/C(=C/CS=5C=CC(O)=NC=5)[C@]41CC2=O	True	465.64	4.32	2	4	2	73.13	0.596	No	0	Yes	7.72
CC/C=C/[C@@H1](/N=C\CNCC1CCCCC1)[C@@](C)(OC(=O)CCC)C(C)(C)O	True	394.6	4.43	2	5	12	70.92	0.222	No	0	Yes	4.25
CS(=O)(=O)[C@H1]C(O)(CCCC1=CC=CC=C1)O[C@H1](COC(=O)CCC(N)=O)[C@](C)(OC)C[C@@H1](O)C[C@@H1](O)[C@H1](C)[C@H1](O)CC(=O)O	True	662.78	0.48	6	12	23	240.21	0.069	No	3	No	5.1
N12C(=O)[C@@H1]3CCCN3C(=O)[C@@H1](N)CC=CC=CC=C1C4=CC=C(C#CC5=CN6N=CC=C6C=N5)C42	True	464.53	1.88	1	6	0	96.83	0.601	No	0	Yes	5.34
C=1C(=O)C=C(O)C=C(CCC(O)(C(=O)OC)C(C)C(O)C([2H])([2H])OCOC(=O)CCCCCCCC)C=1	True	498.61	2.85	3	9	17	139.59	0.168	No	0	Yes	4.52
C1OC2=CC=CC=C2C(=O)C[C@H1](CN3CCCC(OC)C3=O)C(=O)NCC=NC4=CC(C(=O)N(C)C)=C4N=C1C	True	549.63	1.79	1	8	4	129.97	0.61	No	1	No	4.94
C12[N@@+1]([O-1])(CCCCCCCCCCOC3=C(Cl)C=C(C(=O)O)C=C31)C2(O)CCC4=CC=CC=C4	True	488.02	6.24	2	4	4	89.82	0.302	No	1	No	4.37
CC(O)C(=O)NC=C1C(C)=C(C)C(=O)O1	True	211.22	0.22	2	4	2	75.63	0.64	No	0	Yes	3.86
O1NC(COCC2CC2)=CC=C1C	True	181.23	1.74	1	3	4	30.49	0.716	No	0	Yes	3.56
O1C=NC=C2C(C=CC3=C(NCC(F)(F)F)N=CN=C23)=C1C=N	True	321.26	1.16	2	6	3	83.25	0.831	No	0	Yes	3.93
O1C=CC=C(NCC2=CC=CC=C2C[C@H1](O)O)C(=O)[C@]1C	True	288.32	1.18	3	5	5	78.79	0.709	No	0	Yes	3.3
COC=C1C=C(C(=O)OC)CC=C1N=COCC2=CC=C(C3=CC=CC=C3)C=C2	True	389.45	4.82	0	5	7	57.12	0.295	No	0	Yes	3.16
N1C(=O)C=CC=C(CCCC2NCCC(C3=CC=C(C4NCCN(CC5CCCCC5)CC4)C=C3)CC2CCl)C1Cl	True	601.71	6.64	3	4	9	56.4	0.22	No	2	No	4.74
O1C=C2C=C(OCC(=O)CC3=CC=CC=C3O)C=C2CC[C@@H1](O)C(C)(C)C1	True	370.45	3.43	2	5	5	75.99	0.831	No	0	Yes	4.36
C1N(CC2=CC=C(C(F)(F)F)C=C2)CC1	True	215.22	2.91	0	1	2	3.24	0.733	No	0	Yes	1.61
C=CCC=CN(CC1=CC=C(Cl)C=C1)N=[N+1]2N=C(Cl)C=CC2	True	336.25	4.73	0	1	6	30.97	0.42	Yes	0	Yes	4.03
C12C(CCNS(=O)(=O)C3=CC=CC=C3)(C[C@@H1]CO[C@](C)[C@H1](C(=O)CC=C(C)C)[C@H1]1)CC2=O	True	458.6	3.85	1	5	8	89.54	0.598	No	0	Yes	5.16
C12S(=O)(=O)C=CC=CC(C=C3N=C[NH1]C=C(OC4=CC=CC(C#N)=C4)C(C)=[N+1]=C3)CC1=N2	True	446.51	2.18	1	7	3	118.01	0.714	No	0	Yes	5.8
O1C2[C@@H1]CS(=O)(=O)[C@H1]21	True	133.15	-0.66	0	3	0	46.67	0.412	No	0	Yes	5.51
O[C@@H1][C@@H1]1CC2CCC(=O)N2C[C@H1]1C3=CC(O)=CC(O)=C3O	True	292.31	1.43	4	5	2	101.23	0.488	Yes	0	Yes	4.25
CC(/C=C/C(C)=C/C=C/C(C)=C/CC/N=C/C1=CC=CC=C1C(=O)OCCN(OC)C(C)CC)(C)C	True	494.72	7.37	0	5	14	51.13	0.089	No	1	No	4.07
CN(C/C=C\CN1C2=CC=CC=C2C3=CC=CC=C31)C=O	True	278.36	3.44	0	2	5	25.24	0.518	No	0	Yes	2.53
CN(CCCOC1=CC=CC=C1Br)C[C@H1](C)N2CCC(C3=CC=CC=C3)C4=CC=CC=C4NC2=O	True	536.51	6.61	1	3	9	44.81	0.313	No	2	No	3.39
CN1N=C(C=2C=C[NH1]C=2C(C)(C)CN)N=C1C	True	233.32	1.35	2	4	3	72.52	0.84	No	0	Yes	3.31
CCN1CCN([C@@H1](C)CC2=CC=CC(F)=C2F)CC1	True	268.35	2.53	0	2	4	6.48	0.828	No	0	Yes	2.58
NC(=O)OCCCCOC=CC(C(=O)N[C@@H1](CC1=CC=CC=C1)C(=O)O)=CC=CN	True	417.46	1.6	4	6	13	153.97	0.164	No	0	Yes	3.53
CC(CC/C(C1)=C/CC/C=C\C(C)C(C)O)[C@](C)(OC(C)=O)C2[C@](C)[C@@H1]([C@@H1](C)CCC=CO)[C@]2(C)C(=O)[C@H1](C)[C@@H1](OC(=O)C3=CC=C4C(=C3)OCCCO4)[C@@]1(C)[C@@H1](O)CCC5C=C(C)C5C(=O)O	True	946.25	10.76	4	11	17	186.12	0.05	No	3	No	7.02
C1C(CCCCO[N+1](=O)[O-1])C[C@](C2)[C@@H1]1C(C)[C@H1](O)C[C@@H1]2C	True	298.4	3.39	1	4	6	72.6	0.463	No	0	Yes	4.52
C=1C(=O)NC=NC=C(CS[C@H1]2C[C@@H1]2C3=CC=C[NH1]3)[NH1]C(=[N+1]=1)CCC	True	344.46	1.53	3	4	6	83.38	0.684	No	0	Yes	5.76
C12[C@@](C3)(O)C=NO[C@](C[C@@]3(O)C1N)C(=O)[C@]2(CCC)C	True	281.33	0.12	3	6	2	105.14	0.667	No	0	Yes	6.63
C12C(=O)/C=C/C(C)(C)OC[C@H1]O[C@@H1](NC1=O)C=CC(=O)[C@H1](/C=C(\C)[C@@H1](O)CC3=CC=CC=C3)CC=C2	True	492.59	3.41	2	6	4	101.93	0.493	No	0	Yes	6.25
C1[C@@H1](O[C@@H1]2O[C@H1](CO)[C@H1](O)[C@H1](OP(=O)(O)O)[C@H1]2NC(C)=O)O[C@H1]1O[C@@H1]3CC(=O)C4=C(O)C=C(CC[C@H1]C(=O)OCCO)[C@H1]34	True	636.52	-1.62	7	14	14	257.07	0.084	No	3	No	5.56
C#CCN(C(=O)C(C)CC)C=C1C(C(=O)N[C@@H1](CCC(=O)OC(C)(C)CN)C2=CC=CC=C2C)=[N+1]1C/C=C/C3CC3	True	561.75	4	2	5	15	104.74	0.146	No	1	No	4.67
C[C@H1]O[C@@H1]O[C@H1](CO)[C@@H1]O[C@H1]O[C@H1](C)[C@@H1](O[C@H1]O[C@H1](C(=O)O)[C@@H1](O[C@@H1]1O[C@H1](CO)[C@H1](O[C@H1]O[C@H1](CN)C(N)=NC[C@@H1]O)[C@@H1](O)[C@H1]1O[C@@H1]2O[C@@H1](C)[C@H1]O)[C@H1](O)[C@H1]2O[C@H1](O)[C@@H1])O[C@H1](O)[C@H1]OCOCCO	True	1006.94	-4.56	12	28	39	431.45	0.012	No	3	No	4.67
CN(C1=CC=C2C(=C1)C(=O)C(=O)O2)C(C)(C)C	True	233.27	2.02	0	4	1	46.61	0.423	No	0	Yes	2.73
NC(=O)NC/C(=N\O)/C=C1/C=CC=C(C(F)(F)F)[NH1]1	True	276.22	0.97	4	4	3	99.74	0.351	No	0	Yes	3.81
C1COC(=O)C2=CC=CC(OC)=C2CCNC(=O)[C@H1](C)N(C)C(=O)[C@@H1](CC3=CC=C(O)C(OCCO)=C3)[C@H1]1C	True	542.63	2.33	3	8	6	134.63	0.474	No	1	No	4.36
C12NCCNC(=O)C(CCCCCCCCCCCCCCCC=CC3=CC=CC=C3O)OC(CO)C(O)C1OC(C)C(O)C2O	True	648.88	3.96	7	9	18	160.74	0.117	No	2	No	5.24
CN(CC1=CC=C(N2CCOCC2)C=C1)C(C)C	True	248.37	2.36	0	3	4	15.71	0.813	Yes	0	Yes	1.9
CC(O)C(=O)OCC(CO)C(=O)OCC	True	220.22	-0.92	2	6	6	93.06	0.562	No	0	Yes	3.31
C[C@@H1](C1CCC[C@H1](O)C(N)C[C@](O)(COC(N)=O)ON=N1)OC(=O)O[C@@H1]OC[C@@](C)(O)[C@@H1](C)[C@H1]CC2=CC=CC=C2	True	582.65	2.3	5	13	12	217.74	0.178	No	2	No	6.14
C[C@@H1](COC(=O)NC(C1)C(=O)OCCCN)N[C@H1]COP(=O)(O)O[C@H1]2[C@@H1](O)[C@H1](N3C=CC(N)=NC3=O)O[C@@H1]2COP(=O)(S)O[C@H1][C@@H1](O)[C@H1](O[C@@H1]4OC(C(=O)O)CC[C@H1]4NC(=O)C(O)C(O)C(O)C1N)C=O	True	1080.91	-5.22	14	28	7	493.21	0.04	No	3	No	7.6
C[C@H1](CC/C(C)=C/C=CC(=O)C(C)CC[C@H1])OC(C)=O	True	278.39	3.92	0	3	9	43.37	0.365	No	0	Yes	4.19
C1OC=CC=2OC=C(C=2C(=O)[C@H1]OC(=O)O1)C(C)(C)[C@@H1]C[C@H1]OC(C)=O	True	363.34	3.33	0	8	5	101.27	0.58	No	0	Yes	5.03
O1C=C2C=C(CN3CCCC3)C=C1C2(C)C	True	217.31	2.85	0	2	2	12.47	0.705	No	0	Yes	4.21
C1N(CC2=CC=C(Cl)C=C2CC3=CN=NN3C1C=O)OC(=O)NCC4CCCCC4	True	431.92	3.3	1	7	4	89.35	0.747	No	0	Yes	4.17
CC(OCOC(C=1C=COC=1)C[C@@H1]O[C@@H1]2O[C@H1](CO)[C@@H1](O)[C@H1](O)[C@H1]2O[C@@H1]O)CO	True	420.41	-0.42	5	11	13	160.44	0.264	No	1	No	5.33
COC1=CC=CC=C1C(=O)N[C@H1]2COCCN2C	True	250.3	0.71	1	4	3	50.8	0.858	No	0	Yes	2.73
N1C(=O)C=CC=C2C(C3C=C(Cl)C4=CC=C(OS(=O)(=O)O)C=C4C(O)=CC3=C2)[NH1]C1=CC5=CC=CC=C5	True	536.99	4.49	4	6	3	124.96	0.426	No	1	No	4.92
NC(=O)C1=CC(C=2C3=COC=2)=COCC(=C31)[C@H1]4C=CC(=O)[C@H1][C@H1](O)C[C@@](C)CC/C=C\C=C\C=C\[C@@H1]4OC=O	True	529.59	2.75	2	7	4	129.06	0.583	No	1	No	6.53
CC(N1CCN(CC2=CC=CC=C2)CC1)=NC(=O)N3CCCCC3	True	328.46	2.83	0	2	2	39.15	0.619	No	0	Yes	2.32
C1[C@H1]([C@H1](O)CCC2CCCC[C@H1]2C(=O)O1)C=O	True	240.3	1.31	1	4	1	63.6	0.554	No	0	Yes	4.33
CN(C)C(=O)C1=CN(C)ON1	True	157.17	-0.7	1	4	1	44.81	0.546	No	0	Yes	3.88
COC(=O)OC(C)C(=O)C=CC=O	True	186.16	0.48	0	5	4	69.67	0.363	No	0	Yes	3.57
C1OC=C(C2=CC3=CC=CC=C3O2)C[C@H1]1O	True	216.24	2.55	1	3	1	42.6	0.796	No	0	Yes	3.36
C1[C@@H1]C2CC3=CC=C(O)C=C3CC[C@H1]21	True	187.26	2.72	1	1	0	20.23	0.662	No	0	Yes	3.66
O1CCNC=C(COC(=O)CCCCCC(N2C=CC3=C4C=CC=C32)C(=O)O4)OOC1=O	True	444.44	3.12	1	10	8	114.32	0.284	No	0	Yes	5.53
C1C(CCCC(C)C(=O)/C(C2)=C/CC/C(C)=C/CC=C3SC(C)=CC=C3O[C@H1]C)O/C(C)=C\C=C\[C@H1](C(=O)O)[C@H1]CC[C@@](C)(O)[C@@H1](C1)C(CC=O)=CC[C@@H1](C(C)C)C(=O)O[C@@]2C	True	874.21	12.39	2	9	11	136.43	0.089	No	2	No	7.58
C1OCC(OC)C=CC1=O	True	142.15	0.16	0	3	1	35.53	0.523	No	0	Yes	3.9
CN(CCC1=CC=C(OC)C=C1OCC)CC2[C@H1]C(=O)O[C@@H1]2CC	True	334.44	2.72	0	5	9	48	0.65	No	0	Yes	3.49
C1C(=C/[C@H1](O)[C@H1](C)/C=C/C=C(\O)C2=CC=C(O)C=C2OC3=CC(O)=CC=C31)OC(=O)NCC4=CC=CC=C4C(C)C	True	557.64	6.83	5	7	4	128.48	0.238	No	2	No	4.51
CN(C[C@H1]CN(C1=CC=CC2=C1C(=O)N3CC=CC=CN(C)C(=O)[C@@H1]4CCCN4C(=O)[C@@H1](NC(=O)NCC5=CC(Cl)=CC=C5)C6CCCC6)CC3C=C2C7=CSC8=C)C=CC=C87	True	873.54	5.91	2	7	10	108.54	0.246	No	2	No	7.01
C[N@+1]([O-1])=C(C/C)C(=O)NCC(C)C	True	186.25	0.75	1	2	4	55.17	0.305	No	0	Yes	3.23
CN(O)C(=O)CC(C)(C)C	True	145.2	1.27	1	2	1	40.54	0.446	No	0	Yes	2.65
C1N(C2=CC=C(N3CCC(F)CC3)N=C2)C(=O)OCCNC(=S)[NH1]C4=CC(F)=CC=C4C1	True	461.54	3.64	2	5	2	69.73	0.662	No	0	Yes	3.48
C12NCCN(C3=CC=CC=C3C(=O)N(CC4=CC=C(Cl)N=C4)C5=NC=CS5)C[C@@H1]1CC2	True	454	4.23	1	6	5	61.36	0.586	No	0	Yes	3.47
C12C(N(C(=O)OCC(F)(F)F)C(C)C[C@H1])CCC3=CC=CC=C3[C@@H1](C=CC(O)=COCCC(=O)O)[C@@H1]1CCC2=O	True	565.59	5.62	2	6	10	113.37	0.215	No	2	No	5.11
C1OC=CC(OC)=C(OC)C(O)=C1	True	184.19	1.48	1	4	2	47.92	0.706	No	0	Yes	3.73
C12[C@]3(OCC)[C@H1](O[C@@H1]1C3[C@@])CC[C@@H1](CO[C@@H1]4C[C@H1](C)C[C@H1]4OC)CC(C)O2	True	379.52	3.15	0	5	6	46.15	0.709	No	0	Yes	6.83
C1OC(=O)C2=C(C=CC=C2C(C)(C)OC(C)=O)C3=CC=CC=C31	True	310.35	3.82	0	4	2	52.6	0.791	No	0	Yes	2.52
O1[C@]23O[C@@H1]2CN3C[C@@H1](O)C[C@@H1](O)CC14CC[C@@](C)C4CC=O	True	310.37	0.22	2	6	2	82.53	0.561	No	0	Yes	6.71
CN(CC1=CC=CC=C1O[C@H1]2C[C@@H1](NC3=NC(C)=C[NH1]3)[C@H1]2C4CC4NC(=O)OCC)CC5CCCCC5	True	509.7	5.11	3	6	11	91.51	0.39	No	2	No	4.54
C=NC(CO)C=CC=CC=C1C=CC(=O)OC1=C	True	245.28	0	1	4	5	62.8	0.587	No	0	Yes	4.73
C12N(C)C(=O)C=CC(Cl)=C(C(=O)C=CC=C(O)COC=CC)[C@H1](C3=CC=C(O)C=C3)OC1O2	True	473.91	3.77	2	7	7	108.83	0.268	No	0	Yes	5.24
C=1C(OCC(=O)OC=CC(OC)=CC2=C(C=C3C(=C2OC)OCO3)C(C4)(O)CC5=C(C)C(O)=CC(O)=C5C4=O)C=CC=C=1	True	590.58	3.87	3	11	9	150.21	0.169	No	2	No	5.18
CN(CC1=CC=C(F)C=C1OC(C)CC)CC(C)C	True	267.39	4.09	0	2	7	12.47	0.737	No	0	Yes	2.67
O1C(=O)C=C(O)[C@@]1(O)CCC(C)(C)O	True	202.21	0.22	3	5	3	86.99	0.57	No	0	Yes	4.09
N1C(=O)NCC=CN([C@H1]([N-1]S(=O)(=O)C(F)(F)F)CS2C1CC2)C3=CC=C(O)C=C3	True	453.49	2.31	4	5	3	112.84	0.525	No	0	Yes	5.79
C1N[C@H1](O)C[C@@](C)C1CC[C@@H1][C@@H1]2CC(C)(C)OC(C)(C)C2	True	295.47	3.48	2	3	4	41.49	0.834	No	0	Yes	4.93
C1OCC2=CC=C(CCCCN)C(OC)=CC=C2[C@H1]NC1=O	True	303.38	1.75	2	4	5	73.58	0.759	No	0	Yes	3.87
CN(C=CC1=CC2=CC=C1C=CC2=O)CCCC	True	241.33	3.34	0	2	5	20.31	0.8	No	0	Yes	3.67
CC(C(=O)N[C@H1]1CCCC2=CC=CC=C21)=CC[C@@H1][C@@H1]CC[C@]3(C)C(=O)CC[C@@H1]3C(OC)=COC	True	465.63	5.82	1	4	11	64.63	0.254	No	1	No	4.64
C12N(C)C=NC=NC(NC3=C(Cl)C=CC=C3C(N)=O)C=NC1=C2	True	330.78	1.52	2	6	3	95.44	0.879	No	0	Yes	5.01
C1C(NS(=O)(=O)C2=CC=C(SC)C3=C2)C4[C@H1][C@@H1]5C#CC6=CC(=O)C=C[C@]6(C)[C@@]53OO[C@@H1]14	True	454.55	2.52	1	6	1	81.7	0.399	No	0	Yes	7.47
C123[C@@H1]CCC[C@H1](C)[C@@H1](O)[C@H1](C)/C=C\CC(=O)NOC(=O)[C@H1](C)[C@](CC[C@H1]([C@@H1](C)O)C4=CC(O)=CC=C4C5=C(O)C=C(O)C=C5O[C@])(CC1)[C@@H1]2OC3=O	True	719.83	5.51	6	11	7	192.08	0.156	No	4	No	7.2
CN(CC1CC1(C)CC)COC(C)=O	True	199.29	1.88	0	3	5	29.54	0.5	No	0	Yes	3.97
COCCCC/C=C\C=C\[C@H1](O)CC(=O)NCCC1=CC=CC=C1O	True	347.46	2.73	3	4	12	78.79	0.401	No	0	Yes	3.02
NC(=O)N1CCC[C@H1]1C(=O)N[C@H1](C(=O)N2CCC[C@H1]2C(=O)N[C@H1](C(=O)C(F)(F)F)C(C)CC(C)C[C@@H1](C)CSCCOC(=O)[C@@H1]CC3=C[NH1]C4=CC=CC=C34)NC(=O)[C@H1](CO)NC=O	True	924.03	1.7	7	11	24	262.43	0.035	No	3	No	5.63
OCN1C=CC=C1C2NC=CC(Cl)=C2	True	210.66	1.72	2	3	2	37.19	0.78	No	0	Yes	4.18
COCNC(=O)C(C)C1=CC=CC(=C1CC)C2=CC(C(C)(C)O)=CC(=C2OC)NC(=O)C=CCOC=CC=CCCCCCCCCCNCCNCCC=CC=C(C3=CC=C(NC4=CC=NC5=CC=C(F)C=C45)C(Cl)=C3C=NC)N	True	1127.89	12.94	7	12	35	193.48	0.005	No	4	No	5.35
O1C2=CC=CC(N)=C2C1=O	True	135.12	0.8	1	3	0	52.32	0.423	No	0	Yes	2.41
C1OCCCC1N2OC3=CC=CC=C3[C@@]2C4[C@@H1](OC(C)=O)C(=O)N4	True	331.35	0.79	1	6	3	77.1	0.652	No	0	Yes	4.13
O1[C@H1][C@H1](O)[C@H1](O)[C@@H1](O[C@H1][C@H1](O)[C@@H1](O)[C@H1](NC=NC2=C(N)N=CN=C2)O[C@H1]NC=O)CNC1=O	True	470.42	-3.59	8	13	12	243	0.048	No	2	No	6.11
O1C(=O)CSC2=NC=CC2N1	True	170.19	0.08	1	5	0	50.69	0.559	No	0	Yes	5.09
C1S(=O)(=O)[C@H1]C(C)(C)[C@H1]1O[C@H1][C@H1]O[C@H1]C=C[C@]2(O)O[C@@][C@H1](CC3=C(OC)C(C)=O)[C@@](C)[C@H1](CC=C[C@H1]4[C@@](CC[C@@H1]3)CC(CC2=O)C4(C)C)[C@@H1]OC(=O)CCOCC5=CC=CC=C5[C@H1]	True	887.1	8.02	1	12	16	160.96	0.056	No	3	No	7.31
CC(C[C@H1](O)C[C@@H1](O1)C[C@H1]C2C(O)C(O)C(O)CC2O1)C=O	True	317.36	-0.64	4	7	5	116.45	0.393	No	0	Yes	5.38
C1C[C@@H1](OC)C[C@@H1]CCC[C@H1]1	True	154.25	2.76	0	1	1	9.23	0.564	No	0	Yes	4.78
O1C2=NC=C(C=3SC=CC=32)CN4CCCC[C@H1]4C(=O)N1C	True	303.39	2.42	0	5	0	45.67	0.75	No	0	Yes	4.8
C1N(CC2=C3C=C(C4=CC=NC=C4)C=CC=C32)CC(=O)OCC5=CC=CC=C51	True	368.44	3.83	0	4	3	42.43	0.772	No	0	Yes	3.12
CC(C(=O)OCOC(=O)C1=CC=CC(O)=C1)C(C)(C)O	True	282.29	1.46	2	6	5	93.06	0.627	No	0	Yes	2.95
C123C(=C(C4C[C@H1]1C#N)C2OCO4)CCC5=CC6=C(C=C53)OCO6	True	309.32	2.19	0	5	0	60.71	0.688	No	0	Yes	6.14
C1N(C)C(=N)C2=CC=CC=C21	True	146.19	1.46	1	1	0	27.09	0.589	No	0	Yes	2.45
C12OC=C(F)C=C(OCC3=C(Cl)C=CC=C3)C(C)=C1CO[C@@H1]2O	True	338.76	3.62	1	4	3	47.92	0.914	No	0	Yes	4.12
CN(C)C(=O)NC1CC2=NC=CC=C2CC3[C@H1]1[C@](C4)CC[C@@H1](O)[C@@H1](C(C)C)[C@H1]4[C@@H1](O)CC3	True	442.62	3.21	3	4	2	85.69	0.657	No	0	Yes	5.56
FC1=C2C=C(C=C1CCC3=CC=CC=C3)OCO2	True	244.26	3.34	0	2	3	18.46	0.824	No	0	Yes	3.2
C=C(NC(=O)OCC1=CC=CC=C1C=CC2=CC=CC=C2)C(C)C	True	321.42	5.25	1	2	6	38.33	0.738	No	1	No	2.42
C1OC(=O)C2=C(C(F)=C(C)C3=C2C=C(C4)C=CC(C(C)C)=CC4=CC=C3OC(C(=O)O)CCOC(=O)CC(O)C)CCC(OC(C)=O)C1O	True	682.74	4.91	3	10	10	165.89	0.227	No	1	No	6.34
C1N(C2=CC=C(C(=O)C3=CC=CC=C3)C=C2)C(=O)OCC4=CC=CC=C41	True	343.38	4.57	0	3	3	46.61	0.654	No	0	Yes	2.07
CN(C=CC1=C2C3=CC=C1OC(C)C)C(=O)COC4=CC=C(C=C4OS=O)O[C@@]5(CO5)C[C@@H1](C)/C(=N\OC(=O)O)C[C@@H1]2S3	True	632.71	4.95	2	11	5	145.72	0.2	No	2	No	6.93
C1N(CCNC=2C=C[NH1]C=2)CC1	True	165.24	1.13	2	2	4	31.06	0.7	No	0	Yes	2.56
C1CC(=O)NC=CC(C2=CC=CC(C(C)=O)=C2)=CC=C(C(N3)=[N+1])[N-1]C(=O)[C@@H1]13	True	362.39	1.65	2	3	2	111.67	0.779	No	0	Yes	5.64
C123C(N)CC[C@](C)[C@H1]4CC=C[C@@H1]3[C@]4(C)[C@H1]1C(=O)C2	True	244.36	2.49	1	2	0	43.09	0.665	No	0	Yes	6.08
BrC1=CC=CC=C1[C@@H1]C2=CC=CC=C2	True	246.13	4.05	0	0	2	0	0.749	No	0	Yes	2.08
O1C2=NC=C3C(=C12)C[C@H1](CCNCC4N(/[N+1]([O-1])=N/[C@H1]C5CCC[C@@H1](C)O5)CC4)OC(=O)NC=C3	True	471.54	2.86	2	8	8	126.68	0.198	Yes	0	Yes	5.87
O1C=CC=CC(NCC(O)CNC2CN(C3=CC=C4C(=C3)C(=O)N(C5CCC(=O)NC5=O)C4)OCC2C6CCC6)C=C1CC	True	605.74	2.29	4	9	10	132.47	0.297	No	1	No	5.26
C1C(CNCC2=CC=C(C3=CC=CC=C3)C=C2)=NN1	True	251.33	2.4	2	3	5	36.42	0.856	No	0	Yes	2.15
ClC1=CC=CC=C1[C@H1]C2=CC=CC3=CC=CC=C23	True	251.74	5.09	0	0	2	0	0.595	No	1	No	2.04
O1C2=CC=CC=C2[C@H1]1NC(=O)[C@H1]/C(=C\C3=CC=C(O)C([N+1](=O)[O-1])=C3)C(C)(C)O	True	383.38	2.87	3	6	6	121.93	0.521	No	0	Yes	3.71
C1OC2=CC=CC=C2[C@@]1(C)O	True	150.18	1.29	1	2	0	29.46	0.603	No	0	Yes	3
COC1=CC(CCC=C2CCCCC2)=CC=C1O	True	246.35	4.22	1	2	4	29.46	0.806	No	0	Yes	2.34
C1NS(=O)(=O)CC2=CC(C)=CC=C2N1	True	212.27	0.8	2	3	0	58.2	0.668	No	0	Yes	3.25
NS(=O)(=O)OC1CCCCC1	True	179.24	0.54	1	3	2	69.39	0.672	No	0	Yes	2.41
N[C@H1](O)C(=O)O	True	91.07	-1.65	3	3	1	83.55	0.337	No	0	Yes	2.87
O1C2=N[NH1]C(N=S(C1)N)C2O	True	176.2	-1.75	3	6	0	92.23	0.408	No	0	Yes	7.01
O1C=C2C=C(N=N2)C=C1	True	120.11	1.72	0	3	0	33.95	0.479	No	0	Yes	5.57
CCCCCCC[C@H1](N(C)C(=O)[C@H1](C)NC(=O)OC(C)(C)C)C(=O)OCC=C(C)C	True	426.6	4.6	1	5	12	84.94	0.28	No	0	Yes	3.37
OC/N=C(\S)NNC1=CC=CC=C1	True	197.26	0.84	4	3	3	56.65	0.251	No	0	Yes	2.81
O1C2=CC=CC3=C2C4[C@@H1]O[C@@]13NC5NN=C(C#CC6=CC=C(C=7C=CSC=7)C=C6)N=NC=CN54	True	465.52	4.23	2	9	1	82.84	0.526	No	0	Yes	7.1
C1C(=O)NC2=CC=C(C(=O)N[C@@H1]3COCC3C[C@@H1]O)C=CC2=C1	True	315.35	0.87	3	4	4	87.66	0.718	No	0	Yes	4.74
CN1CCC[C@@H1]1CNCC2=CC=CO2	True	194.28	1.46	1	3	4	28.41	0.786	No	0	Yes	2.67
C1N(C2=CC=C(C(F)(F)F)C=C2)[C@@H1]3CC[C@](C1N)(C)C3	True	284.33	3.41	1	2	1	29.26	0.856	No	0	Yes	4.34
N1[C@H1]C2C3=C(C=CC=C3[C@H1]1CNCN)OC2=O	True	232.26	0	3	5	3	76.38	0.388	No	0	Yes	4.52
O1[C@](O)[C@@]C2O[C@]OC[C@@](C34C[C@]([C@H1]2C[C@]13OCO)CO4)CC[C@H1]OC(C)=O	True	394.38	0.87	2	9	6	112.91	0.385	No	0	Yes	2.93
C[C@@H1]C[C@@H1]1O[C@H1]1C(=O)C[C@H1](F)[C@H1]O[C@H1]C2[C@H1](NC(=S)NC3=CC=CC=C3F)[C@H1]O[C@H1]C[C@H1](O)[C@H1](O[C@H1][C@H1](O4)[C@@H1](N5C=C(N)NC5=O)[C@@H1]OO)[C@H1](CN)O[C@H1](O)[C@H1]2O[C@@H1]6OC[C@](O)(NC(=N)N)[C@H1]6O[C@@H1](O)[C@H1]4	True	1030.03	-1.43	13	22	17	389.61	0.016	No	3	No	7.87
CN(CC1=CC=C(C2CCCC2)C=C1)CC(=O)N(CC)C3=CC=CC=C3	True	350.51	4.83	0	2	7	23.55	0.714	No	0	Yes	2.07
C1CC/N=C(\S)N/N=C/C2=CC=CC(N)=C21	True	234.33	1.42	3	4	0	62.77	0.469	No	0	Yes	3.87
C[C@H1](NC(=O)[C@H1](CC1=CC=C(O)C=C1)NC=O)OC(C)CC	True	308.38	1.33	3	4	9	87.66	0.474	No	0	Yes	3.59
O1C2=CC=CC=C2[C@@]1CCNC(=O)NCC3=CC=CC=C3	True	281.33	2.85	2	2	5	50.36	0.885	No	0	Yes	2.26
C12N(CC=C3C=C(CCCCN4C(=O)C5=CC=CC=C5C4=O)C=C3C(C)=C)C(C(C)(C)C)CC(=O)C6=CC=CC=C6N(C1=O)C2=O	True	617.75	6.07	0	6	8	95.07	0.155	No	2	No	5.14
C1[C@H1]OC(=O)/C(=C\O)C[C@H1](C)C[C@H1](C)CNC(=O)[C@H1]([C@H1](OC)[C@@H1](O)[C@H1](C)[C@@H1](C)O)O1	True	430.52	1.09	4	8	5	134.55	0.289	Yes	0	Yes	5.77
CN(CC(=O)CC)CC(=O)C1=CC=CC=C1	True	219.28	1.78	0	3	6	37.38	0.684	No	0	Yes	1.98
CN(C1CCN(CCCCC2=CC=C(F)C=C2)CC1)[C@@H1](C(=O)NCC3=CC=CC=C3)C(N)=O	True	454.59	2.71	2	4	11	78.67	0.404	No	0	Yes	2.82
ClC1=CC=CC=C1COCC(NC2=CC=CC=C2)C(OC3=CC=CC=C3)N	True	382.89	4.7	2	4	9	56.51	0.526	No	0	Yes	2.93
CN(CC(=O)N1CCC[C@H1]1CO)C2CCCCC2O	True	270.37	0.2	2	4	4	64.01	0.766	No	0	Yes	3.37
C1N(C)C(=O)C2=NC3=C1C=CC=C3CN2[C@H1]	True	213.24	1.17	0	3	0	35.91	0.648	No	0	Yes	4.22
C1NCC(CC=2C=CSC=2)[C@@]1(C)CCCC(C)(C)O	True	281.46	3.46	2	3	6	32.26	0.837	No	0	Yes	3.99
N12C(=O)[C@H1]OC(=O)[C@H1](C)[C@H1]1O2	True	156.12	-0.56	0	4	0	58.91	0.348	No	0	Yes	5.01
C1N(C=NC2=CC=CC=C2C=O)C1	True	174.2	1.47	0	2	3	32.44	0.301	No	0	Yes	2.82
C123OC=NC=NC1(N[C@H1]CC[C@@H1](N4C=CC(N)=NC4=O)C)NC2=C(C5=CC=C(NC(=O)C6CCCN6C(=O)CN)CC(F)=C5CS3C)C(=O)N[C@@H1](CO)C(=O)N[C@@H1](CC7=CC=CC=C7)C(N)=O	True	945.07	-0.95	10	16	17	315.87	0.068	No	3	No	6.79
C1C(CCC(O)CC2OC(C1)N(C)C)O2	True	215.29	0.94	1	4	1	41.93	0.707	No	0	Yes	5.27
C1C(O)CC1OC(=O)C(CC(C)C)CCC(C)CC	True	270.41	3.54	1	3	8	46.53	0.686	No	0	Yes	3.37
C1COC=C(C2=CC=C(O)C=C2OC3)CC=CC(=O)OC4=CC=C(C(C)=C4C31)O	True	394.42	4.2	2	6	0	85.22	0.515	No	0	Yes	4.91
O/N=C\NCCCNC(=O)C(N1CCOCC1)CP(=O)(O)O	True	338.3	-1.62	5	6	9	143.72	0.084	No	0	Yes	3.74
O1[C@@H1](CCCCOCCCCCC)C[C@@H1](C2O)[C@@H1](OC(=O)CCCCCC(C)(C)CC=O)O[C@@H1](C)C(=O)C[C@@H1]21	True	554.77	5.7	1	8	19	108.36	0.123	No	2	No	5.33
C1N(C)C(=O)C(=O)NCCC2=CC=CC(O)=C2C1=O	True	262.26	-0.29	2	4	0	86.71	0.629	No	0	Yes	3.12
C1[C@H1]CC[N+1]CC[C@@H1](C)[C@H1]CC[C@@H1][C@H1]2[C@H1](O2)[C@H1](O)C/C(C)=C/CC/C(C)=C/C(C)/C=C/C(=O)O1	True	471.68	5.34	1	4	0	73.16	0.294	No	1	No	6.31
C1C(CN2CCCC2)CC[C@@H1]1C/C(C)=C/CC	True	235.41	4.24	0	1	5	3.24	0.644	No	0	Yes	3.33
O1C=NC(C2=NC=NC12)C=C	True	149.15	0.41	0	4	1	46.31	0.498	No	0	Yes	5.68
C[C@H1](NC(=O)CNC(=O)[C@H1](N)CCC)C(=O)O	True	245.28	-1.18	4	4	7	121.52	0.45	No	0	Yes	2.76
C12C(CCOC(=O)C3=CC=CC(OC)=C3)O[C@@H1]O[C@](C4)CC[C@@H1]1[C@]42O	True	346.38	2.47	1	6	5	74.22	0.826	No	0	Yes	5.13
CN(C(=O)C1=CC=C(C2=CC=CC=C2)S1)C[C@@H1](C)O	True	275.37	2.87	1	3	4	40.54	0.932	No	0	Yes	2.51
C1C(=O)C=C(O)C=C(OC(=O)/C=C/C2=CC=C(O)C=C2)C(O)=C1	True	314.29	2.69	3	6	3	104.06	0.585	No	0	Yes	3.13
O1[C@@H1][C@@H1]2CCCC[C@]2(C[C@H1]1)CC[C@H1]	True	178.28	3.4	0	1	2	9.23	0.629	No	0	Yes	5.32
C1C(C(=O)OCC=CC2=C(CC(=O)NCC3=CC=CC=C3)C4=CC=CC=C24)=C\C=CC=C5OC=CC5=C1	True	489.57	4.46	1	4	8	68.54	0.475	No	0	Yes	3.86
C1[C@@H1]C2C3=C[C@@]4O[C@]14C(=O)O[C@](C)[C@@]2(O)C(=O)[C@@]3(CO)CC[C@@H1]5CC[C@](O)([C@H1](O)C6=CC=CC=C6)C(C)C5	True	523.6	2.52	4	8	6	136.82	0.33	No	1	No	6.9
COC(=O)C1=CC2=C(C(C3=CC=CC=C3)=C2CC[C@@H1]C4=CC(O)=CC=C4OCO)CO1	True	419.45	3.9	2	6	8	85.22	0.499	No	0	Yes	3.44
CN(O)CCN1C=CC(=CO)C(=O)OC1	True	214.22	0.08	2	6	3	73.24	0.3	Yes	0	Yes	4.05
C1C(C2=NOC(C2)CN(S(=O)(=O)C3=CC=CC=C3)CCC4=CC=C(S(=O)(=O)O)C)=C4C1	True	464.57	3.03	1	6	4	113.34	0.685	No	0	Yes	5.04
CC(NS(=O)(=O)NCCN(CF)CCF)(C1=CC=CC=C1)C2=CC=CC=C2	True	397.49	2.57	2	3	11	61.44	0.573	No	0	Yes	2.98
C12OC(=O)[C@@H1](O)[C@H1]C(=O)[C@@](C)[C@H1](O)C(=O)[C@H1](C)[C@@H1](OC)C(=O)C1OC(C)C=C(CO[C@@H1]3O[C@H1](CO)[C@@H1](O)[C@H1](O)[C@@H1]3O)C2=O	True	616.57	-4.11	6	16	5	252.88	0.16	No	3	No	6.28
NC(C1=NC=CN=C1C2=CC=CC3=CC=CC=C23)C(=O)NCC4=CC=CC=C4C(=O)N[C@@H1](CC5=C[NH1]C6=CC=CC=C56)C(=O)N[C@@H1](CC7=C[NH1]C=N7)C(=O)NCC	True	762.88	4.02	7	8	15	212.67	0.081	No	2	No	4.26
O1/N=C2\C3N(C(=O)C=C4N=CC5=CC=C(C=C5N=C43)OC6=CC=C(Cl)C=C6OC)C[C@@H1]NC1=NC7=CC(C8=CC=CC=C8)=CC([N+1](=O)[O-1])=C7OCCCC2=O	True	759.15	6.88	1	13	5	178.91	0.168	No	3	No	5.76
C1OCCC2=CC=C(C3C=CC(=O)OC3)C=CC=C12	True	256.3	2.48	0	3	1	35.53	0.676	No	0	Yes	4.25
C[S@](=S)C1SC(N)=NC1=S	True	210.37	0.41	1	4	1	38.38	0.636	No	0	Yes	5.46
CN1N=C(CCC(C2)CCC2)N=C1C	True	193.29	2.25	0	3	3	30.71	0.737	No	0	Yes	2.56
N1C(=O)C2=NC=CC=C2C(=O)N1CCCN3CCOCC3	True	290.32	-0.19	1	6	4	80.22	0.844	No	0	Yes	2.49
O1C[C@H1]C2N3CCC[C@H1](CO[C@@H1]1CC=C4C(=O)OCC4)[C@H1]3CC[C@]2[C@H1]OC(=O)CC5=CC=CC=C5	True	480.58	3.59	0	7	6	74.3	0.455	No	0	Yes	6.44
N12[C@H1]CC=C[C@]1[C@H1]2CC3[C@H1]4C=C(CC[C@]45)C[C@]C6[C@H1]3[C@@](CC[C@@H1]6)[C@@H1](CO)NC(=O)[C@H1]7N[C@H1]7C(=O)O5	True	474.58	1.86	3	6	3	100.58	0.328	No	0	Yes	5.65
C1NN=C(C2=CC=C(C(F)(F)F)C=C2)C=CNC1=O	True	269.23	1.64	2	3	1	53.49	0.814	No	0	Yes	3.12
O1C=NC=CC(C(=O)OC2C=CN(C3CC3)C=C2F)=CC=C1S	True	334.37	3.42	1	6	3	55.57	0.678	No	0	Yes	4.59
C1N(S(=O)(=O)C=2C=C(Cl)SC=2Cl)CC[C@H1]1C(=O)O	True	330.21	2.15	1	4	3	74.68	0.921	No	0	Yes	2.83
CCOCC(=O)N(C1=CC=CC(OCC2=CC=CC=C2Cl)=C1)S(=O)(=O)C3=CC=CC=C3[C@@H1](C(=O)N[C@@H1](CC4=CC=CC=C4)C(N)=O)N5CCCCC5	True	747.31	5.42	2	8	16	148.34	0.155	No	2	No	3.73
CC(O[C@H1]C1[C@@H1](N2C=NC3=C(N)N=CN=C32)[C@H1]1)OP(=O)(O)O	True	327.24	0.42	3	8	6	145.61	0.507	No	0	Yes	4.69
ClC1=CC2=C(NN=CC=CC=C2F)C(F)(F)[C@@]1	True	258.63	3.44	1	1	0	28.68	0.759	No	0	Yes	4.33
C12[C@]3C(=O)O[C@H1](C)[C@H1]3O[C@@H1][C@@H1]1[C@@H1]2OOC(=O)CC	True	254.24	0.57	0	6	3	71.06	0.416	No	0	Yes	5.34
O1N2C(=O)C=C3[C@](C)[C@@H1](C1)N(CC[C@@H1]O)[C@@H1]23	True	222.24	0.23	1	4	3	53.01	0.742	No	0	Yes	5.94
COC(=O)C=C(NC(=O)/C(C)/C(C)=C/C=C/C1=CC=CC=C1)C=O	True	327.38	2.65	1	4	7	72.47	0.362	No	0	Yes	3.56
N1C(=O)C=CC=C2C=C(NCCNC(=O)CCNC3=CC=CC=C3)N=C(C)C=C12	True	391.48	2.01	4	5	8	94.62	0.51	No	0	Yes	3.3
O1C2=CC=CC=C2[C@H1]1[C@H1]C3=CC=CC=C3	True	195.24	3.37	0	1	2	9.23	0.713	No	0	Yes	2.92
CC(=O)N[C@H1](CS)C(=O)N1CCC[C@H1]1C(=O)N[C@@H1](CCC(=O)O)C(=O)N[C@@H1](CCCNC(=N)N)C(=O)NCC2=CC=CC=C2CC(=O)NNC(=O)NCCCCCC(=O)NN	True	878.03	-2.75	14	12	25	361.26	0.009	No	3	No	4.53
C1OC2=CC=C(C=C12)C(=O)C3=C(O)C=C(C)C=C3C=O	True	268.27	2.64	1	4	3	63.6	0.686	No	0	Yes	2.5
C1N(CC2OC(C3=CC=CC=C3)O[C@H1]2C=C[C@@H1]1O)C(=O)C=CSC4=CC=CC=C4COC(=O)CCOC(=O)[C@]C5CC(C(=O)O)C=C5O[C@@H1]O[C@H1]CCCC[C@H1](C)[C@@H1](O)[C@H1](C)[C@H1](O)[C@H1](C)C[C@H1](C)[C@H1](O)C[C@@H1](C)C[C@H1](O)[C@@H1]	True	1090.34	7.58	6	16	32	248.28	0.014	No	4	No	7.08
C[C@@H1]OC(=O)C(C)(C)C[C@H1](O)/C=C(C)[C@H1](O)[C@@H1](C)[C@@H1](O)C[C@@H1](C)/C=C/C=C/C=C/C=C/C=C/[C@H1](O)CC(=O)[C@H1](C)/C=C(\C)[C@@H1](O)CCC(C)CC(=O)[C@@](O)C(CO)=C/C=C(OC(=O)C1=CC=C(OC)C=C1)[C@@H1]CC	True	1030.33	9.43	7	14	35	237.58	0.015	No	4	No	6.84
C1C(NS(=O)(=O)C2=CN=C(CC)S2)CCN1C(=O)C(F)CC	True	349.45	1.33	1	5	6	79.37	0.84	No	0	Yes	3.69
O1[C@H1]C/C2=C\CC/C=C\CC[C@]2(OC1=O)C(=O)NCCCCCC(C(=O)C3CCCC(C(N)=O)C3=O)O	True	517.6	2.58	3	8	10	162.09	0.172	No	1	No	5.46
C12N(CC=C3N=CC=CC3=C1C#N)NC(=O)[C@@H1](CC(=O)N4CCOCC4)C[C@@H1](CC(=O)O)NC(=O)[C@@H1]5C[C@@H1](N)CN5C(=O)[C@H1]([C@@H1](C)O)NC2=O	True	695.73	-4.73	6	12	5	260.62	0.169	No	3	No	5.79
C1N(C/C=C/C2=CC=C(OC)C=C2OCC)CC1	True	247.34	2.81	0	3	6	21.7	0.771	No	0	Yes	2.05
C[C@@H1](OC(=O)[C@]1CCC(C)(C)C[C@H1]1C=CC[C@@H1][C@@]2(C)C[C@@H1](O)C[C@@H1](C[C@H1](C)[C@@H1](O)[C@@H1](C)[C@H1]3CC[C@@H1](C)C[C@H1]3OC(=O)/C=C/C4=CC=C5C=C4)O2)C(OC)=C5C(C)O	True	791.08	8.6	3	9	2	131.75	0.199	No	2	No	7.71
C1N(C=C2C=C(N(C)CCCCCO)C=C2)CC=N1	True	261.37	1.76	1	4	7	39.07	0.71	No	0	Yes	3.91
C1C(CC(=O)O[C@H1]2C[C@H1](NC(=O)C3=CC=C(F)C=C3)[C@H1](C)O2)=CC(=O)N(N)C1=O	True	405.38	0.55	2	7	5	128.03	0.317	No	0	Yes	4.01
C1C(=O)/C=C/[C@H1](C)[C@@H1](O2)[C@@H1](C)/C=C(/C)C(=O)[C@H1][C@H1]([C@H1](OC(C)=O)[C@@H1](C)CC(O)C(O)C/C=C\CC/C(C(=O)OC(C)(C)C)=C1OC=O)CC[C@H1](O[Si](C)(C)C(C)(C)C)C2=O	True	860.15	7.39	2	13	6	189.03	0.089	No	3	No	7.11
C1N2OC=C1C2C=NC[C@H1](C)N3C=C(F)C(=O)[NH1]C3=O	True	280.26	-0.18	1	6	4	79.69	0.776	No	0	Yes	5.72
O1C=NC=NC2(NC=C(F)C=C2OCCNCCO)C=NC1=C	True	323.33	0.21	3	8	6	99.83	0.607	No	0	Yes	5.86
Br	True	80.91	0.58	0	0	0	0	0.4	No	0	Yes	6.96
C=1OCCNC2=NC=C(CCC3=CC=CC=C3)N=C2CC[C@@H1]=1	True	295.39	3.15	1	4	3	47.04	0.945	No	0	Yes	3.45
C1N(CCC=NC=CSNC)CCCC1=O	True	241.36	1.45	1	5	6	44.7	0.565	No	0	Yes	4.02
O1[C@H1]O[C@@H1]CCC[C@@](C)[C@H1]1CC2[C@H1]C[C@@H1](OCC(=O)O)[C@@H1][C@@H1](O)[C@@H1]2O	True	355.41	1.46	3	6	5	105.45	0.641	No	0	Yes	6.19
CC(COP(=O)([O-1])[O-1])NP(=O)([O-1])O	True	232.04	-2.73	2	6	5	144.81	0.486	No	0	Yes	5.43
CS(=O)(=O)NCCN(CC(=O)N[C@H1](CO)CC1=CC=CS1)CC	True	363.51	-0.36	3	6	11	98.74	0.499	No	0	Yes	2.98
CS(=O)(=O)OCC(=O)O	True	154.14	-0.95	1	4	3	80.67	0.53	No	0	Yes	2.46
C1N(O)CCCCCC2=CC(=O)C3=C(O)C=CC(O)=C3[C@H1]21	True	289.33	2.57	3	5	0	81	0.64	Yes	0	Yes	4.05
COC1=CC=CC=C1/C[C@@H1](/C(O)=C\C(=O)C=C(O)OC=O)O	True	308.29	1.18	3	7	8	113.29	0.375	No	0	Yes	3.67
N#CNCCOC1=CC=CC=C1C(=O)O	True	206.2	0.83	2	4	5	82.35	0.423	No	0	Yes	2.26
CC(NC(=O)CNC(=O)[C@H1](N1CC=C(C)C=C1)C2=CC=CC=C2CC3)CCCCC3	True	409.57	4.02	2	3	1	61.44	0.736	No	0	Yes	4.15
N1C(=O)C2=CC=CC(=C2O3)CC=C4C1=C3NC(=O)C=5[NH1]C(C(=O)C6=CC=C(Br)C=C6)=NC=54	True	489.29	3.08	3	5	2	113.18	0.479	No	0	Yes	4.43
C=12[C@]C(=O)O[C@@H1](C[C@]=1C)[C@@]2(C)OC=O	True	194.19	0.64	0	4	2	52.6	0.478	No	0	Yes	6.05
C1S(=O)(=O)C2=CC(Br)=CC=C21	True	233.09	1.74	0	2	0	34.14	0.683	No	0	Yes	2.74
C1[S+1]([O-1])C2=CC=CC=C21	True	138.19	1.31	0	1	0	23.06	0.496	No	0	Yes	4.19
C1OC2=CC=CC=C2CC[C@H1]1C(=O)O	True	192.21	1.71	1	2	1	46.53	0.736	No	0	Yes	2.46
C12OC(=O)C=CC1(C3C=CCC(C(=O)O)C3O)C4=CC=C(C5=CC=C(F)C=C5)C=C24	True	406.41	3.54	2	4	3	83.83	0.602	No	0	Yes	4.34
S(NC(=O)N[C@@H1]CCCNC(=O)C=CCNCCOCCOCCNC=CC(=O)C(Br)=C(C=CC=C(O[C@@H1]1O[C@H1](CO)[C@@H1](O)[C@H1](O)[C@H1]1O)C=C)COC[C@@H1](C)C)N=N	True	905.89	1.55	10	17	32	274.64	0.011	Yes	3	No	5.96
C12OC=CC(C3=NC=C4OC=C(O)C4=C3)=C(C5=COC(=N5)[C@@]C=C1)CNCCCN(C)CC2	True	446.51	3.65	2	8	1	96.79	0.585	No	0	Yes	6.16
NCC1=C(N[NH1]C2=NC=CC21)CN(C)C	True	207.28	-0.59	3	5	3	65.68	0.579	No	0	Yes	4.61
CN(C=CC1=CC=CC=C1OC(C)C)CC(=O)NC2=CC=C3N=C2NCC3	True	366.47	3.38	2	5	7	66.49	0.786	No	0	Yes	3.8
C12N(CC3=CC=C(OCC(N)=O)C=C3)C[C@H1]CN(S(=O)(=O)C4=CC=CC(C(F)(F)F)=C4)C(=O)O[C@@H1]1CCO2	True	556.54	2.53	1	8	7	128.47	0.551	No	1	No	4.34
CN(CCCOC1=CC=C(Cl)C=C1Cl)C(=O)C2=CC=CC=C2	True	338.23	4.53	0	2	6	29.54	0.724	No	0	Yes	1.76
C1C[C@H1](O)C(=O)NC=C2C=CSC2=C1	True	209.27	-0.46	2	3	0	49.33	0.607	No	0	Yes	4.66
C1OC(=O)[C@H1][C@](C2)CC[C@H1](N(C)C)[C@@H1]1[C@]2O	True	224.28	0.96	1	4	1	49.77	0.674	No	0	Yes	5.44
CC(C1=CC=C(OC2=CC=CC=C2)C=C1)OOC(=O)CCC(=O)NO	True	345.35	3.3	2	6	8	94.09	0.433	No	0	Yes	2.79
C1C(=O)O[C@H1]C[C@@](C)(O)[C@H1]C2C(O)=CCO[C@@]2(C)[C@H1](O)[C@@](O)C1C(=O)N	True	370.38	-0.35	5	8	1	159.54	0.392	No	0	Yes	6.07
CN(CC1=CC=C(OC(F)(F)F)C=C1C)CC2=CC=NC=C2N(C[C@@H1](O)[C@H1](CC3CCCCC3)N4C=NC=N4)C(C)(C)C	True	602.75	6.69	1	8	12	79.54	0.247	No	2	No	4.14
C1OC2=CC=CC(NC(=O)C3=CC=CC=N3)=C2CC=C1NC(=O)C4=CC=C(C=C4)F	True	403.41	3.72	2	4	4	80.32	0.696	No	0	Yes	2.54
C1/C(=C/NC2=CC=C(C=C2C)CCCCC=O)OCCCCC(=O)[C@H1](OC1=O)C3=CC=CC=C3	True	463.57	5.6	1	6	8	81.7	0.312	No	1	No	3.9
CCCCCCCCCOC(=O)C=1C=NN(C)C=1	True	252.36	3.33	0	4	9	44.12	0.5	No	0	Yes	2.02
C12NN=C(CC3=C(C)C=CC=C13)C2C4=CC=C(C(F)(F)F)C=C4	True	316.33	4.35	1	2	1	24.39	0.831	No	0	Yes	4.26
C1N(C=C(C)N(CC2=CC=C(F)C=C2)CC3=CC=CC=C3)N=N1	True	310.38	4.33	0	4	6	31.2	0.795	No	0	Yes	2.72
CC(CCCCC(=O)O)C(Cl)Cl	True	213.1	3.07	1	1	6	37.3	0.543	No	0	Yes	2.92
C1OC2=C(C=O)C(C)=C(OC)C=C2C1=O	True	206.2	1.39	0	4	2	52.6	0.686	No	0	Yes	2.89
C[C@@H1](CCC[C@H1](O)[C@H1]1C(=O)C[C@@H1]2OC(=O)C3NC(C)=CNC(=O)C[C@@](C4C=CC(=O)OC4=C)[C@@]C[C@H1](OC(C)=O)C(C)=C3C(=O)OC[C@H1](O)[C@@H1]1)C[C@H1]O[C@](C)(O)C[C@@H1]2	True	810.89	2.52	5	15	2	233.32	0.199	No	2	No	7.84
CC(NC(=O)[C@H1](CC1=CC=C(O)C=C1)NC(=O)[C@@H1](N)CCCCN)C(=O)N[C@H1](C(=O)N[C@H1](C(=O)N[C@@H1](CC(C)C)C(=O)N[C@@H1](CC2=C[NH1]C3=CC=CC=C23)C=O)OC)CCCC(C)C	True	892.11	1.72	10	11	28	288.96	0.028	No	3	No	4.95
C=1[C@H1]2OC(=O)C=C[C@@H1]2C[C@@H1]=1	True	136.15	1.04	0	2	0	26.3	0.367	No	0	Yes	4.03
CN(C1=CC=C(N2CCOC3C2=O)C=C1)[C@H1]4CN(C(=O)[C@H1]5CCOCC5)C[C@H1]4C(=O)NCCC[C@@H1](C(=O)N[C@H1]C(=O)N[C@H1](CC6=CC=C(O)C=C6)C(=O)N[C@H1](C(=O)O)[C@@H1](C)C)CC(=O)N3C	True	918.04	0.38	6	12	11	256.56	0.179	No	3	No	6.7
O1C=NC=C(CN(C)C2=CC=CC=C2)N=C1	True	215.26	2.05	0	4	3	37.19	0.773	No	0	Yes	3.51
O1C[C@H1]2NC[C@H1]3O[C@@]3[C@]24C[C@H1]14	True	152.17	-0.32	1	3	0	33.79	0.483	No	0	Yes	6.12
CN(CC(=O)NCC1=CC=C(Cl)C=C1)C=O	True	240.69	1.04	1	2	5	49.41	0.782	No	0	Yes	2.16
C=1OC2=CC(CNC3=NC(C)=CS3)=NC(C4=CC=C(F)C=C4)N2NC=1	True	357.41	3.31	2	7	4	61.78	0.879	No	0	Yes	3.95
C1/C(=C/C2=CC(OC)=CC(OC)=C2OC)C3=CC4=CC(=C31)OCO4	True	326.35	3.54	0	5	4	46.15	0.86	No	0	Yes	3.62
C=1N(C)C(=O)C=CC(NC(=O)C=CC(NC(=O)O[C@@H1](C)C2=CC(Cl)=CC=C2)Cl)CO[C@H1](O)[C@H1]OCC=C=1	True	553.42	2.94	3	7	6	126.43	0.214	No	1	No	5.79
C1N(CC=NC2C=C1C=CC2)OC(=O)NC(=O)C3=CC=C4C(=C3)CCCO4	True	367.41	2.43	1	6	2	80.23	0.868	No	0	Yes	4.74
O/N=C1/CCCN1C[C@H1](C)NC(=O)OC(C)(C)C	True	257.33	1.78	2	4	3	74.16	0.597	No	0	Yes	3.25
O1C2=CC=CC=C2[C@H1]1C3=CC=CC=C3	True	182.22	3.17	0	1	1	9.23	0.658	No	0	Yes	2.25
C12OC=CC(OC)=C([C@H1]3O[C@@H1]3C(=O)N4OC1CCC4C)CCC2C	True	335.4	2.31	0	5	1	60.53	0.688	No	0	Yes	6.62
C1NCC[C@]1(N)C(=O)N[C@H1](C=NC(C2=CC=CC=C2)=C[NH1])CCOCC	True	358.47	0.94	3	5	9	112.54	0.45	No	0	Yes	4.32
C[C@@H1](/C=C/[C@H1](COC(=O)CCC(=O)NCCNC(=O)/C=C/C1=CC=C(C2=CC=C(Cl)C=C2)O1)O[C@@H1]OC(C(=O)O)[C@@H1]O[C@@H1]3OC(C)(C)O[C@@H1]3COC(C)(C)O[C@H1]O[C@@H1]4O[C@H1](CO)[C@H1](O)[C@H1](O)[C@H1]4N)C(C)(C)OS	True	1073.59	3.3	8	21	31	313.95	0.01	No	3	No	6.6
C12C(C(=O)[C@H1](O3)C(C)CO[C@]3C4[C@@H1](C)CCC[C@]41O[C@H1])CN(C(=O)C5=CC6=CC=CC=C6O5)CC[C@](C)(O)C[C@@H1](CC[C@H1](C)/C=C/C=C7/[C@H1]O[C@@H1](CO)[C@@H1](O)[C@H1]7)O[C@H1]2CO[C@@H1][C@@H1]O[C@](CO)[C@H1]OS(=O)(=O)O	True	1027.17	5.27	5	17	18	259.65	0.094	No	3	No	6.93
CN(CN(C)C(=O)[C@H1](NCC1=CC=CC=C1)CC2=CC=CC(Cl)=C2CC)CC(=O)C(=O)O	True	459.97	2.6	2	5	12	89.95	0.374	No	0	Yes	3.25
C12C[C@]C(=O)C(C[N+1]3=CC=C(OC)C=C3)=CCC[C@](C)[C@H1]1[C@H1]2	True	296.39	2.79	0	2	3	30.18	0.803	No	0	Yes	5.37
O1C=NC=C(CN(F)C2=CC=CC=C2)NC=C1C(=O)C=CO	True	303.29	3.27	2	5	5	82.36	0.383	Yes	0	Yes	3.4
COC(=O)[C@@H1](NC(=O)[C@H1](CC1=CC=CC=C1)NC(=O)[C@@H1](NC(=O)[C@@H1]2CCC(=O)N2)C(C)(C)CC)CC(C)C	True	530.67	1.62	4	6	13	142.7	0.286	No	1	No	3.73
C[C@@H1]O[C@H1][C@H1](O)C[C@@]1(C)C(=O)C[C@H1](C(C2)(C)O)NS(=O)(=O)CC[C@@](C)[C@@H1]C[C@@H1](O)C[C@@H1]1[C@](C)C3NCCOCCOCCOCC(=O)NCCCNC(=O)NCCCC[C@H1]23	True	873.14	1.67	8	13	5	243.11	0.196	No	3	No	7.52
O[C@H1](C1=CC=C(C2=CC=CC=C2)C=C1)[C@H1](C)CN3CCC(O)CC3	True	325.45	3.48	2	3	5	43.7	0.884	No	0	Yes	2.76
C1CC(=O)OCCCC=C(OC)C=C(F)C(/C=C/C2=CC=C(NC(=O)CI)C=C2)=C1	True	525.36	5.5	1	4	5	64.63	0.313	No	2	No	3.71
FC1=CC=CC=C1C(=O)O	True	140.11	1.52	1	1	1	37.3	0.642	No	0	Yes	1.37
CC(C1C2C=C3[NH1]C(C(OC)(CC)C3)C2)C(=O)[C@@H1](C)C1(C)C	True	305.46	3.54	1	3	3	38.33	0.866	No	0	Yes	6.01
C[C@@H1](NC(=O)[C@H1](CCC(=O)O1)NC(=O)[C@H1](CC(=O)O)NC(C)[C@@H1](CNC(=O)C2=NC(N)=NC=C2CCC)C(=O)N[C@@H1](CC3=CC=C(O)C=C3)C(=O)N[C@@H1](CC4=CC=C(O)C=C4)C(=O)N1)CC5=CC=CC=C5	True	981.08	0.65	11	15	15	342.49	0.078	No	3	No	5.94
C[C@H1](NC(=O)[C@H1](CCCCN)NC(=O)[C@H1](CCCNN)NC(=O)C(C)(C)NC(=O)[C@H1](CC(N)=O)NC(=O)[C@H1](CC(C)C)NC(C)=O)C=O	True	684.84	-3.16	10	11	24	298.83	0.021	No	3	No	4.46
CCCC[C@@H1](C)C(=O)N1[C@@H1]C(=O)N2CCC[C@@H1](C(C)C)[C@@H1]21	True	293.43	3.04	0	2	5	40.62	0.781	No	0	Yes	4.16
C1C(/N=N/C=CC2=CC(C)=CC=C2)C(=O)O1	True	216.24	2.34	0	4	3	51.02	0.575	Yes	0	Yes	3.71
O1C2=NC=C(C3=CC=CS3)N=C2[C@@]1(CC4=CC=CC=C4[N+1](=O)[O-1])C(=O)CCC5=CC=NC=C5	True	458.5	4.54	0	8	8	108.11	0.282	No	0	Yes	3.56
C1N(C[C@@H1](C)C2=CC=CC3=CC=CC=C23)CCC1C(=O)O	True	283.37	3.35	1	2	4	40.54	0.935	No	0	Yes	2.72
CC(N(CC1CCCC1)C(=O)NCC2=CC=CC=C2)C(=O)C(F)(F)C(=O)N3CCCCCC3	True	463.57	4.38	1	3	8	69.72	0.582	No	0	Yes	3.14
O1[C@H1][C@@H1](O[Si](C)(C)C(C)(C)C)[C@H1](O)C[C@H1](OC(C)=O)[C@@](C)[C@@H1]1	True	329.49	3.01	1	5	3	64.99	0.637	No	0	Yes	4.66
C1OC2=CC(OC)=CC(OC)=C2C1=O	True	194.19	1.28	0	4	2	44.76	0.711	No	0	Yes	2.25
C[C@@H1]CCNC(=O)COCCOCCNC(=O)[C@H1](C)NC(=O)[C@@H1]NC(=O)[C@H1](CCC(=O)O)NC(=O)[C@H1](C)NC(=O)[C@H1](CCC(=O)O)NC(=O)[C@H1](CO)NC(=O)[C@@H1]NC(=O)[C@H1](CC(C)C)NC(=O)[C@H1](CC(C)C)NC	True	1057.19	-4.23	14	16	40	416.32	0.026	No	3	No	5.59
C1OCN(CC2=CN=C[NH1]2)C[C@@H1]1O	True	183.21	-0.44	2	4	2	61.38	0.652	No	0	Yes	3.44
O1[C@](CC(=O)OC2COCCOCC2)[C@](O)[C@H1](C)[C@@H1](O)[C@](O[C@@H1]3O[C@H1](C)[C@H1](O)[C@H1](O)[C@@H1]3O[C@H1]O)[C@H1]1OP(=O)(O)OC[C@H1]OCC(NC(=O)[C@@H1](N)CC4=CC=C(O)C=C4)C(C)C	True	893.85	0.14	9	20	20	323.17	0.048	No	3	No	6.35
COC(=O)C=C(NC(=O)[C@@H1]1CCCN1C(=O)[C@@H1](NC(=O)CN)C(C)C)CCC(C)C2OC2(C)C	True	480.61	0.84	3	7	11	143.36	0.226	No	0	Yes	4.23
C1C(C(=O)NC2CC=CC3=CC=CC=C32)=C[C@@H1](C4=CC=CC=C4)O1	True	317.39	3.96	1	2	3	38.33	0.93	No	0	Yes	3.6
C1OC2=CC(O)=CC=C2[C@H1]1C3C=C(C4=CC=CC=C4O3)OC	True	296.32	3.32	1	4	2	47.92	0.923	No	0	Yes	3.43
C1=CCC(CCCCCC(=O)O)N1CC2=CC=CO2	True	263.34	3.4	1	3	8	53.68	0.73	No	0	Yes	3.19
C/C(=C\C1=CC=CC=C1C(C2)(C)C)OC=NC3=NC4=CC=CC=C4N=C32	True	343.43	5.2	0	4	0	47.37	0.563	No	1	No	3.64
O1C=NC(N)=C(C2=NOC(F)=C2CN(C)C)N=C1	True	253.24	0.55	1	7	3	89.24	0.849	No	0	Yes	4.26
O1C2=NC=C(C(=O)O)C(F)=C2NC(=O)[C@H1](O)CNC[C@H1](O)[C@H1]1CO	True	345.28	-2.08	6	8	2	161.24	0.353	No	1	No	4.7
O=[C@](CCOC1=CC=C(C(=O)O)C=C1[C@H1])OCC	True	250.25	1.78	1	4	6	72.83	0.779	No	0	Yes	2.54
O1C=CC=C(OCC2=CC=C(O)C=C2O)C(=O)C1=C	True	260.25	2.12	2	5	3	75.99	0.814	No	0	Yes	3.15
C1N(C)CC=C2C=C(Cl)C=C12	True	167.64	1.92	0	1	0	3.24	0.533	No	0	Yes	3.56
C1N(C2[C@@H1]CN(C3CCOC3C)C21)C(C)(C)C	True	237.37	1.53	0	3	1	15.71	0.688	No	0	Yes	4.92
C1C(CNC(=O)CCC2=CC=C(Br)C=C2)O1	True	284.15	1.9	1	2	5	41.63	0.839	No	0	Yes	2.3
[2H]C([2H])([2H])O[C@]C=C(OC)C(=O)C=CC[C@@H1]	True	183.22	1.43	0	3	7	35.53	0.442	No	0	Yes	5.87
C=1OC=CC(OC)=CC(C[C@@H1](C)C[C@H1](C)CCCC(C)C)=C=1	True	304.47	5.98	0	2	9	18.46	0.488	No	1	No	4.5
NC(=O)[C@H1](CC1CCCCC1)NC(=O)C2=CC=C(C=CC(O)=CC(O)=C)[C@H1](CCCCCC(=O)O)[C@H1]2O	True	516.64	3.88	6	6	14	170.18	0.116	No	2	No	4.42
CN(C1=CC(N2C=C(Cl)C=N2)=CC=C1I)C(C)C	True	375.64	3.97	0	3	3	21.06	0.757	No	0	Yes	2.76
C1[C@@H1](CN2C(=O)C=CC3=CC=C(C)C(OC)=C3OCN)C(=O)N[C@H1](CCNCCC(OC4=NO[N+1]([O-1])=C4S(=O)(=O)C5=CC=CC=C5)C(=O)N)CCN[C@H1]2[C@@H1]1O[C@H1]O[C@H1](CO)[C@@H1](O)[C@@H1](NC(=O)OC[C@@H1](O)C(=O)O)[C@H1]C	True	1078.12	-2.27	10	22	28	412.16	0.016	No	3	No	7.67
C1C(C(=O)NCCC(O)C(C)CCNO)C/C=C(\C)CC/C=C(\CCC(C)C)C1=O	True	422.61	3.93	4	5	11	98.66	0.299	No	0	Yes	4.6
CC(NS(=O)(=O)C1=CC=C(F)C=C1)CC2=C(F)C=CC=C2F	True	329.34	3.01	1	2	5	46.17	0.916	No	0	Yes	2.43
C1C(=O)NC2=CC=CC=C21	True	133.15	1.18	1	1	0	29.1	0.565	No	0	Yes	1.89
C[C@@H1](CC/C=C(\C)C(=O)NC[C@@H1](O)CCS)C(=O)O	True	289.4	1.23	4	4	9	86.63	0.38	No	0	Yes	3.66
C12OC=CC(O)=C3C(=O)C=C(C=C3O)OC1=C2	True	232.19	1.53	2	5	0	75.99	0.662	No	0	Yes	5.9
NC(=O)C1=C2C=CC=C1N(CCC3=CC=CC=C3)C2=O	True	266.3	1.99	1	2	4	63.4	0.919	No	0	Yes	2.71
O1C2=NC3=CC=CC=C3N=C2C[C@@]1(O)[C@H1](O)[C@@H1](O)CC(=O)O	True	306.27	-0.55	4	7	4	133	0.591	No	0	Yes	4.02
C123C(C[C@H1]4[C@@]5(C)CC[C@H1](O)C(C)(C)[C@@H1]5CC[C@@]4(C)[C@]1(C)OC2=O)[C@@H1]3O	True	348.48	2.9	2	4	0	66.76	0.661	No	0	Yes	5.43
C1NC(=O)[C@@H1](CC2=CC=CC=C2)NC(=O)[C@@H1](CC3=CC=C(O)C=C3)NC(=O)CNC1	True	410.47	-0.13	5	5	4	119.56	0.481	No	0	Yes	3.67
C1OC=CC=C1/C=N/NC2CN(C)C[C@H1]2CC(=O)OC	True	279.34	0.53	1	6	5	63.16	0.452	No	0	Yes	4.51
C1N(C)C(=O)CCC2=NC3(CCCC3)N(CCC4CCCCC4)C(=O)C2=C1C(C)=O	True	413.56	3.65	0	4	4	70.05	0.706	No	0	Yes	3.73
CCC[C@](C#N)(C(=O)N1CCC(OC2=CC=C(Cl)C(Cl)=C2)C1C=O)N[C@@H1](CC3CCCCC3)[C@@H1]O	True	523.48	5.07	2	6	11	102.66	0.393	No	2	No	4.61
CN(CC1=CC=C(OCC2CCCCC2)C=C1)F	True	251.34	3.96	0	2	5	12.47	0.734	No	0	Yes	2.21
CCC1(CCC)C(=O)N[C@]1(C)CCC=CNC(CCCC2=CC=CC=C2)F	True	374.54	5.27	2	2	12	41.13	0.386	No	1	No	4.41
O1[C@]C(=O)[C@]2(CCC[C@H1](COC(=O)CCC(=O)[O-1])[C@H1](C)C[C@H1][C@]21)[C@H1]	True	333.36	0.96	0	6	5	92.73	0.696	No	0	Yes	5.84
C1S(=O)(=O)[C@H1]CC[C@H1][C@@H1]2CC3=CC[C@@H1](O)C[C@]3(C)[C@H1]2C4C[C@]14C	True	336.5	3.31	1	3	0	54.37	0.691	No	0	Yes	6.05
S1C2=CC=CC=C2CC3CCC[C@H1](CC[C@@H1](O)C1(C)CN)C3=O	True	333.5	3.18	2	4	1	63.32	0.828	No	0	Yes	5.1
O/N=C(/C1=NC=CN=C1)C=2C=COC=2	True	189.17	1.3	1	5	2	71.51	0.439	No	0	Yes	2.97
O1C2=CC=C(C=N2)C[C@@](O)[C@H1](O)[C@H1](O)[C@@]1(C)CO	True	254.26	-0.61	4	6	1	103.04	0.533	No	0	Yes	6.09
O1[C@@]CCNCCC2C[C@@H1]1[C@]CC3[C@](C4)[C@H1](O)C[C@@H1]3[C@@](C)(C(=O)O)CC[C@@H1]24	True	374.5	2.75	3	4	1	78.79	0.658	No	0	Yes	7.59
O1CC2=CN=CC=C2CCC1	True	149.19	1.54	0	2	0	22.12	0.558	No	0	Yes	2.45
C1C(O)CC[C@]1(C)O	True	116.16	0.28	2	2	0	40.46	0.477	No	0	Yes	3.62
C1N2N=CC=C2NC(=O)C=C(C)C1=O	True	191.19	0.35	1	4	0	63.99	0.643	No	0	Yes	3.63
CS(=O)(=O)NCCN(CCCCNC1=CC=NC2=CC3=CC=CC=C3C=C12)CCN(O)C=O	True	473.6	2.28	3	7	14	114.87	0.108	No	0	Yes	2.88
N1C(=O)N[C@@H1]C2=CC=CC=C2C[C@@](O)[C@H1]1C	True	218.26	1.34	3	2	0	61.36	0.615	No	0	Yes	4.29
N1S(=O)(=O)NC[C@H1]O[C@H1](OC[C@@H1](O)[C@H1]O)[C@H1](O)[C@H1]1O	True	300.29	-3.48	6	8	4	157.58	0.312	No	1	No	6.07
C1C(C=C(CCCC)CC[C@H1]2[C@](C)(CO)C[C@@H1](O)O[C@H1]2C1)OC(=O)CC	True	368.51	3.72	2	5	6	75.99	0.552	No	0	Yes	4.95
CCC(=O)N1[C@H1]CC(C2C3=CC=CC(O)=C3)C(=O)OO[C@H1][C@@H1](O1)[C@@](O)(O)[C@@H1]2O	True	395.36	-0.11	4	9	2	145.99	0.398	No	0	Yes	6.19
C1C(C[S+1]([O-1])CC2OC(C)(C)OC2=O)CO[C@]13COC=C(C(C)(C)C)C3=O	True	400.49	1.72	0	7	4	94.12	0.524	No	0	Yes	5.88
C1CC2CCC1N2CCCNC(=O)[C@H1](CC3=CC=CC=C3)NC(=O)CN(CC4=CC=CC=C4)C(=O)CNC(=O)CC(CC5=CC=CC=C5)NC(=O)CNC(C6=CC=CC=C6)(C7=CC=CC=C7)C8=CC=CC=C8	True	966.24	6.69	5	7	25	151.98	0.032	No	2	No	4.97
C12CC[C@](C3)CCC[C@H1](C)C[C@]3([C@@H1](O)C1C2)OO[C@](C4C)CCC(C)=C[C@H1]4OC(C)=O	True	432.6	5.48	1	5	4	64.99	0.276	No	1	No	6.11
O1C(=O)C=C[C@]2(COC(=O)/C2=C/C=C(C)C3CCCC(C)(C)C3)[C@@H1]1	True	329.42	3.89	0	4	2	52.6	0.569	No	0	Yes	5.16
C1=2C(O[C@H1]OC[C@H1]O[C@@H1](OC)[C@H1][C@](O)[C@@H1](O)[C@@](OC(=O)C3=CC=CC=C3)C4=CC=CC=C4)(C1)CCC[C@]=2C	True	521.59	4.84	2	8	15	103.68	0.149	No	1	No	5.01
N12C=CC3=C(O)CC(=O)C(C(F)F)=CC3=C1C=CC2	True	263.24	2.62	1	3	1	40.54	0.79	No	0	Yes	4.15
CCC(=O)NN=CC(C(=O)OC(C)(C)C)=CC=CNC(=O)NC1=CC=CC=C1N(CC(=O)NCC2=CC=CC=C2)C=O	True	576.65	3.38	4	7	13	158.3	0.071	No	1	No	3.45
Cl[C@H1]CN1C[C@H1](NC=C(O2)CC=CC=CC2)O[C@H1]1O[C@H1]O[C@H1](C(=O)O)[C@@H1](O)[C@H1](O)[C@H1]O	True	461.88	0.15	5	10	12	150.18	0.27	No	0	Yes	6.11
O1C(=O)[C@H1](CCCCN)[C@]2(C)[C@H1]C3C[C@@](O2)[C@H1](O)C[C@]31O	True	297.35	0.27	3	6	4	102.01	0.508	No	0	Yes	6.15
CN(CCC1=CC=C(Cl)C=C1)C(=O)OC(C)(C)C	True	269.77	3.75	0	2	3	29.54	0.836	No	0	Yes	1.85
C1[S+1]([O-1])C[C@@]1(C)O	True	120.17	-0.5	1	2	0	43.29	0.438	No	0	Yes	5.11
C1CC(=O)O[C@@H1]CC(=O)C2=CC(C)=CC=C2O[C@@H1]1C(C)/C(CCOCCC)OC(CC=CN(CC3CCCC(=O)O[C@H1]4[C@H1](C)[C@@H1](O)[C@@H1]([C@H1]5O[C@@H1](OCCC6=CC=C(Cl)C(F)=C6)CC[C@@H1]5OOC)[C@@]4C)C3=O)[C@@H1](O)[C@@H1]	True	1056.66	8.26	2	15	25	195.05	0.032	No	3	No	7.26
CC(=O)N1CCC[C@H1]1C2=NC3=CC=CC=C3N=C2CC=C4C(C5=NC=NN5CC)=CC(OC)=C4OC	True	486.58	4	0	8	7	95.26	0.498	No	0	Yes	3.97
OC(C#CCCC1=CN(CC2=CC=C(Cl)C=C2)N=N1)F	True	293.73	2.2	1	4	4	50.94	0.879	No	0	Yes	3.2
C12C(C)(C)C(=O)C=CNC(CC[C@H1]C34[C@@H1](CCCCCCCCC)CCC3)=CC=C4OC=C(N(C)C(=O)NC1)OC(=O)[C@]2	True	592.8	7.1	2	6	8	96.97	0.23	No	2	No	7.31
CC(SCC(=O)O[C@@H1](C)CCCC)C(=O)OC	True	262.37	2.4	0	5	8	52.6	0.629	No	0	Yes	3.08
C1CN2N=C(C)N(CC(=O)NCCC3=CC=CC=C3)N2C4=CC=CC=C4N=C1C	True	390.49	3.13	1	6	5	63.54	0.852	No	0	Yes	3.09
C1[C@H1](CCC(=O)N2CCN(CC)CC2)NC(=O)C=CC(OC)=C3[NH1]C=CC13	True	374.49	0.97	2	5	5	73.91	0.75	No	0	Yes	4.52
C=C(OC1=CC=C(C2=CC=NC=C2)C3=C1N4CCNCC4C3=C)F	True	323.37	3.37	1	4	3	37.39	0.879	No	0	Yes	3.71
O1[C@]2C3=C[C@H1](C1=CC3)OC(=O)NCCC2=O	True	220.2	0.83	1	4	0	64.63	0.656	No	0	Yes	6.04
CC(OCCCC=C(C)CCC)[C@H1](C)C/C=C/C(=O)O	True	282.42	4.59	1	2	11	46.53	0.342	No	0	Yes	3.66
N12C(=O)C3NC=CC(C4=CC=C(Cl)O4)=C1C3(CCC2C(=O)OCOC(=O)/C=C/C(=O)O)C5=CC(OC)=CC(OC)=C5O	True	600.96	2.48	3	11	9	174.07	0.218	No	2	No	5.7
OC[C@H1](C1CCC)C(=O)N[C@@H1]C(=O)N[C@@H1](CC2=CC=CC=C2)C(=O)N[C@@H1](CCC(N)=O)C(=O)N[C@@](C)(CC3=C[NH1]C4=CC=CC=C34)C(=O)N[C@@H1](CC(C)C)C(=O)N[C@H1]([C@@H1](O)CCCC)O[C@H1]1C	True	932.15	2.31	10	10	16	283.17	0.1	No	2	No	6.25
CC1=NN(C)C2=C1CCO2	True	138.17	0.66	0	3	0	27.05	0.526	No	0	Yes	3.08
C1CC(=O)NC2=NN=C(CC(=O)C3=CC=CC=C3)N2C1	True	270.29	1.44	1	5	3	76.88	0.856	No	0	Yes	2.67
CN(CCC(O)(C1=CC=CC=C1)C2=CC=CC=C2)C(F)(F)F	True	309.33	3.76	1	2	5	23.47	0.85	No	0	Yes	2.45
C12CC(=O)NC=CC3OC=C4C=CC(CC=C(C)C)=C3O[C@@](NC(=O)C(C)(C)/C=C/C(C)=C/[C@@H1]1C2)CC4=O	True	517.65	5.23	2	5	2	93.73	0.49	No	2	No	6.91
C1C2ON(C)C(=O)C(=O)C3=CC=CC(O)=C3[C@@H1]21	True	233.22	0.83	1	4	0	66.84	0.674	No	0	Yes	3.85
O/N=C/C(=C/C=C1CC=C(O)C(O)=C1O)CC=C(O)C(=COC2)C=CC(C)(C)C=C2	True	413.47	5.36	5	7	5	122.74	0.136	No	1	No	5.13
CS(=O)(=O)C(=N)C[C@H1](O)[C@H1](C)N	True	194.26	-0.89	3	5	3	104.24	0.4	No	0	Yes	4.17
C1[C@H1]CN(CC2CC2)C3C[C@](CC4)C1=CC[C@@H1][C@]43C[C@@H1]5C=CC(=O)[C@@]56CO6	True	364.51	3.87	0	3	4	32.84	0.71	No	0	Yes	7.09
C1C2=CC=C1C=C2[C@@H1](CC3CC(=O)CC3)C(=O)NCC=4C(=O)[NH1]C=NC=4CO	True	381.43	1.45	3	5	7	112.15	0.662	No	0	Yes	5.08
C1[C@@H1]CC=C(C(=O)[C@@H1]1C=C(C)C)[C@H1]NC(=O)[C@H1](CC(C)C)NC(=O)[C@H1](C)NC(C)=O	True	417.55	2.4	3	4	9	104.37	0.501	No	0	Yes	4.51
C12CNC(=O)C(CC3=CC=C(OS(=O)(=O)O)C=C3)NC(=O)[C@@H1]CCC(=NNC)CNC(=O)[C@H1](C(C)C)NC(=O)[C@H1](C=4C=CSC=4C)CCCO[C@@H1]1C2	True	761.94	2.18	6	11	7	213.62	0.179	No	3	No	5.66
C12CC(=O)O[C@@H1]CC[C@H1]3[C@@H1]CC=C4C[C@@H1](O)CC[C@]4(C)[C@H1]3CC[C@@]1C[C@]2C	True	370.53	5.16	1	3	0	46.53	0.473	No	1	No	5.77
C1C(O)CC[C@](C)C(=O)[C@@](C2)CC[C@H1]1O2	True	210.27	1.45	1	3	0	46.53	0.658	No	0	Yes	5.56
CN(C)C(=O)CCCCC[C@H1](NC(=O)[C@@H1](NC(=O)OC)C(C)C)C(=O)O	True	373.45	0.98	3	5	11	125.04	0.464	No	0	Yes	2.9
CSC(CC=C)C(=O)O	True	146.21	1.38	1	2	4	37.3	0.609	No	0	Yes	3.55
OC(CC1OC2=CC=CC=C2SCC[C@@H1](O)C1O)OC(=O)CCCCCCCCCCCCCCCCC	True	552.82	7.16	3	7	19	96.22	0.095	No	2	No	4.39
COC(=O)[C@H1](O)[C@H1](CCCCCC(Cl)Cl)OCC1=CC=CC=C1	True	363.28	3.86	1	4	11	55.76	0.369	No	0	Yes	3.22
CN(CC1=CC=C(Cl)C(Cl)=C1C=O)OC(C)(C)C	True	290.19	3.97	0	3	4	29.54	0.62	No	0	Yes	3.07
CC/C=C/CCC=CC=C/C1=C/[C@@H1][C@H1](CC=CC2[C@@H1](O)CCN2CCO)[C@@H1](O)CC1=O	True	428.59	3.3	3	5	11	81	0.267	No	0	Yes	5.14
C1CCC=CC2=C(OC)C(OC(=O)C(C)C)C=CC=C1C=C2OC	True	330.42	4.22	0	4	4	44.76	0.724	No	0	Yes	5.15
O1/N=C(\CC2=CN=C[NH1]2)C3=CC=C(C(Cl)(Cl)Cl)C=C3/C1=N/O	True	359.6	3.26	2	5	2	87.3	0.418	No	0	Yes	3.41
C1CCCCCCC[C@@H1]C2[C@](C3)(OC)CC[C@@]12O[C@H1]3O	True	281.42	3.6	1	3	1	38.69	0.798	No	0	Yes	5.67
C12CC(=O)O[C@@H1][C@@H1](C)[C@H1](O)[C@@](O)[C@@H1](C)C(=O)[C@@H1](C)C[C@@H1](O)[C@@H1]1CC[C@@H1]2NC(C)=O	True	411.5	1.12	4	7	1	133.16	0.475	No	0	Yes	5.61
O1N=CC1CCN(C(=O)C2=CC=C(F)C(C(F)(F)F)=C2CN)OC	True	349.28	2.08	1	5	6	77.15	0.63	No	0	Yes	4.1
C1CC=CC=C(OC)CC(=O)C(O)=C(O)C(O)=CC[C@H1](OC)[C@@H1](CCCCC(O)C(C)C(=O)OO)[C@H1][C@H1]2O[C@@H1]2C[C@@H1](C)O[C@]1(C)O	True	655.76	4.67	6	13	9	204.97	0.087	No	3	No	6.2
C1CC2=CC=C(CC(F)(F)Cl)C(OCC(=O)O)=C2CC[C@@H1]1C(=C3)CCC(CCCCCCCCCCC)CC(O)C3(C)C	True	625.28	10.05	2	3	16	66.76	0.083	No	2	No	4.37
OC(C1CCN(CCC2CC2)C[C@@H1]1)C(=O)O	True	226.3	0.76	2	3	5	60.77	0.726	No	0	Yes	3.84
C1N2CCCC[C@H1]2C(C#N)C1=O	True	164.21	0.56	0	3	0	44.1	0.525	No	0	Yes	3.73
NC(=O)CC1=C2C=C(C(=O)C1(C)C)C(C)C(=O)NC2	True	262.31	0.46	2	3	2	89.26	0.757	No	0	Yes	4.83
CCCCCCCCCCCC(=O)N1C(CCCC)C(=O)OC1=O	True	339.48	4.97	0	4	13	63.68	0.27	No	0	Yes	3
C1C2CC2CCC3=CC(O)=CC=C3C1=O	True	202.25	2.55	1	2	0	37.3	0.702	No	0	Yes	3.09
CCOC(=O)NC=C1C(NCC2COCCCCCCCCCC)=CC3=CC=C1C=C3C4=C(C=C(N)CC4(C)CC)N(CCN5CCOCC5)C2=O	True	718	7.04	3	8	17	118.39	0.147	No	2	No	6.12
O1C(=O)C=C(O)C=C(O[C@@H1]2OC[C@H1](O)[C@H1](O)[C@H1]2O[C@H1]3O[C@H1](CO)[C@@H1](O)[C@@H1](O)[C@@H1]3)OC(O)=C1OCCCC(C)C(O)C(O)CCC(O)CC(O)COC(=O)CCC(O)C(OC(=O)CCC(=O)O)C(O)CO	True	1017.95	-4.52	15	27	29	462.62	0.027	No	3	No	7.04
C1CC=C(C)[C@@H1](OC(=O)[C@@]2CC[C@](C)(O2)[C@@H1]13)CC=CC=C3	True	287.38	3.87	0	3	0	35.53	0.501	No	0	Yes	6.16
CCN=CN(C(F)(F)C(=O)N1CC(F)(F)[C@H1](N)CC1C)[C@@H1]C2=CC=CC(Cl)=C2	True	421.85	3.38	1	3	6	61.93	0.331	No	0	Yes	4.67
N1C(=O)C=CC=C(NC(=O)[C@@H1](CCC)NC[C@@H1](O)COC[C@H1](N)C(=O)N[C@@H1](C)C(N)=O)C1	True	454.53	-2.87	7	8	14	197.9	0.145	No	1	No	4.34
[O-1]C=CC=CC(OCCCCOC1=CC=C(C2=CC=C(O)N=C2)C=C1)=C	True	352.41	3.57	1	5	10	74.64	0.402	No	0	Yes	3.15
C=COC=CC(OC(=O)C1=CC=CC=C1)=C(OCC(=O)NCCOCCN(C)CCCCNC(=O)C2=CC=C(NS(=O)(=O)CCO)C=C2[N+1]=O)[O-1]	True	732.79	0.81	4	14	25	236.06	0.048	No	2	No	4
OCCCOCC(CNC(=O)OCC1=CN(C=CC=CC(C#N)=C)N=N1)C=O	True	389.41	0.83	2	9	13	139.36	0.219	No	0	Yes	4.33
ClC=CC1=CC(NC(=O)NC2=CC=CC(CC3=CC=CC=C3)=C2C)(O)C1	True	368.86	4.48	3	2	5	61.36	0.681	No	0	Yes	3.29
O1CCC=NON(CCCCCC2CC=CN(CCCCCC(=O)N[C@H1]C3CNC(CNC(=O)OC(C)(C)C)C(=O)N[C@@H1](CC(C)C)C(=O)NCCC(N)=O)C(=O)OS3=C2)N(C)CC=C1C4=CC=CC(OC)=C4	True	1042.33	5.27	6	15	21	256.82	0.068	Yes	4	No	7.26
FC=C1C=CC[C@@H1](NC(=O)N2C=CC=C3C=C[NH1]C23)C=N1	True	286.31	2.1	2	3	1	56.73	0.775	No	0	Yes	5.26
C1C(CC=2C3=COC(=O)C=2)CC[C@@H1][C@@H1]1CC[C@](C)[C@@H1]CCC[C@H1][C@H1](C)CC[C@@H1](CCC(=O)OC)C4=CC(O)=C(O)C(O5)=C4C=C(O)C(O)=C5C(=O)O3	True	718.84	8.3	4	11	3	172.96	0.178	Yes	3	No	7.36
C1=CC(=O)C2[C@H1][C@@]1(C)CC[C@@]C3O[C@@]3(C)CO2	True	233.29	1.75	0	3	0	38.83	0.598	No	0	Yes	7.01
CC(O)C=C1C2[C@H1]3[C@@H1]CC=C4C[C@@H1](O)CC[C@@]4(OC)[C@H1]2OC(=O)C[C@](O)C(=O)C3=C1C	True	430.5	2.11	3	7	2	113.29	0.454	No	0	Yes	6.99
OC1[NH1]C(=O)C(C(=O)O)=C(CO)O[C@H1]1NC(=O)[C@H1](O[C@H1](C)[C@@H1](O)[C@H1](C)COCC(N)=O)CSC	True	509.53	-3.14	7	11	14	226.97	0.115	No	3	No	5.23
CCN(C1=CC=C2C(=C1)C(=O)C(C)O2)C(=O)NCC[C@](O)(CC[C@@H1](C(=O)CC3C(C4=CC=C(O)C=C4)=CSC3=O)COC(=O)C5=CC=C)C=C5C[C@@H1](O6)C=C[N+1](=C6)C7[C@@](O8)CC[C@@H1](O)[C@@H1]78	True	908.04	5.69	4	13	13	201.24	0.109	No	3	No	7.64
C1C(CCCCC(C)(C)O)[C@@]2(C)[C@@H1]1CC/C(C)=C/C[C@H1](OC)CCC2	True	350.59	6.28	1	2	6	29.46	0.451	No	1	No	4.55
C1CCCCCC[C@H1](O)[C@H1](O)P(=S)(OC2=CC(F)=C(F)C(F)=C2Cl)[C@H1]C3OC(=C)[C@H1](O)C[C@H1]31	True	527.95	5.4	3	6	2	79.15	0.272	No	2	No	5.55
C1CNC(=O)[C@H1](CCCCC(F)(F)F)[C@](C)(O)C[C@@H1](O)C[C@@H1](O)[C@@H1](O)[C@@H1](O)[C@@H1]1O	True	431.45	-0.42	7	7	4	150.48	0.299	No	1	No	5.06
C1CC(=O)O[C@@H1][C@H1]2C[C@H1]O[C@]23O[C@]1(CCOC)O3	True	256.25	1.12	0	6	3	63.22	0.705	No	0	Yes	6.48
CCCCCCCCC[C@H1](O)C[C@@H1]C1=CC=C(C(=O)/C=C/C/C=C2\CCCC(=O)C(C)(C)CC(=O)C(C)C)[C@@]12C	True	551.83	8.79	1	4	19	71.44	0.129	No	2	No	4.6
C12SC=NC=C(N3CC[C@H1](OC)C3)N=C1[C@@H1]2C	True	251.35	1.74	0	5	2	37.19	0.75	No	0	Yes	4.97
CCC(=O)N1CCN(S(=O)(=O)C2=CC=C(C=3C=CSC=3)C=C2)C[C@@H1]1C(=O)O	True	408.5	2.11	1	5	5	94.99	0.818	No	0	Yes	2.8
N1C(=O)[C@@H1]C2=CC(=O)C(C)=C1C(=O)O[C@H1]2C(C)C	True	248.26	0.67	1	4	1	72.47	0.692	No	0	Yes	4.84
C1C2=CC(C)=CC3=C2C[C@H1]/C(=C/C=C/C(C)=C/[C@H1](C)[C@H1]1OC)C4=CC3=CC=C4	True	369.53	6.52	0	1	1	9.23	0.556	No	1	No	5.38
CCNC(=O)[C@H1](C(C)C)N(C)CC(C)(C)C	True	228.38	2.12	1	2	5	32.34	0.782	No	0	Yes	2.98
C1C=C(C#CC2=CC=C(C(F)(F)F)C=C2)C1=O	True	236.19	2.96	0	1	0	17.07	0.633	No	0	Yes	2.75
CC1NC(C)=[N+1]C1=O	True	112.13	-0.74	1	2	0	43.2	0.448	No	0	Yes	5.24
O/N=C1/C2=CC=CC=C2COC1	True	163.18	1.4	1	3	0	41.82	0.464	No	0	Yes	2.56
C1CC(O)COC=C(CO)OC2=C(C[C@@](C)C3CC(=O)C[C@H1](O)C[C@]3(C)[C@H1]2C(=O)C4=CC(O)=CC(O)=C4CC[C@H1]5C[C@H1](O)CC[C@]5(C)C)C=C1	True	695.87	5.58	6	10	6	173.98	0.206	No	3	No	6.29
OC(OC1[C@H1]O[C@@H1](OCCC2=CC=CC(OCC3=CC=CC=C3)=C2)[C@@H1](O)[C@@H1]1O[C@@H1]4O[C@H1](CO)[C@@H1]O)[C@H1](O)[C@H1]4O[C@H1](F)[C@H1]5O[C@@](O[C@H1]5OCOC(=O)C6=CC=CC=C6[C@H1])(O[C@H1]7O[C@@H1](CO)[C@H1](O)[C@@H1](O)[C@H1]7O)CO[C@@H1]CCCl	True	1100.47	0	9	24	26	328.36	0.022	No	3	No	7.1
C1CC(NC(=O)OC)C[C@H1]1C(=O)O	True	187.19	0.6	2	3	2	75.63	0.663	No	0	Yes	2.82
C12CN(C3=CC=C(OC4=CC=CC=C4)C=C3)C(=O)[C@@H1](CC5=CC=CC=C5)NC(=O)[C@@H1]CN=C(NC(=O)[C@@H1]1)NC2=O	True	537.58	2.18	3	6	5	129.2	0.46	No	1	No	5.2
C1CC[C@@H1]1CCCC[C@H1]2C=CO[C@@H1](C3C(=O)OCC(C)C3)C(C)=C[C@@H1](CC4=CC=NC=C4)CC[C@@H1](OCC)O[C@@H1]2C	True	567.81	7.82	0	6	10	66.88	0.163	No	2	No	5.45
C1CC(=O)O[C@@H1]CC[C@H1](C2C(=O)O[C@@H1]3CC[C@H1][C@@H1]3C4C=C5[NH1]C6=CC=CC=C6C5CC[C@@H1]4[C@H1]CCC(O)CCCCCCCC7=NC=CN7)CC=CC=C1CC2=O	True	777.04	9.64	3	8	15	130.61	0.093	No	2	No	7.19
C1C2=CC(O)=CC=C2C1	True	120.15	1.49	1	1	0	20.23	0.55	No	0	Yes	1.84
CCCN(C)CC1=C(Br)C(=O)C2=CC=CC=C2[C@@]1(C(=O)C3=CC=CC=C3)[C@@]O	True	440.34	4.41	1	4	7	57.61	0.649	Yes	0	Yes	3.51
O/N=C\CCCCC(C(=O)NC1CCCC1)C(=O)O	True	270.33	1.77	3	4	8	98.99	0.206	No	0	Yes	3.11
O1[C@]C=C2[C@@](O)(CN(CCC3=CC=CC=C3)CC2(C)CO)C(=O)C1C(=O)C4=CC=CC=C4	True	433.5	2.09	2	6	6	87.07	0.536	No	0	Yes	4.31
C1CC(=O)NC=CC=CC[NH1]C2=C(CC[C@@H1](O)C(C)CCCCCCCCC)CC=C(C3=CC=C(O)C=C3)NC12	True	549.8	6.84	5	5	13	93.62	0.174	No	2	No	4.92
O1[C@@H1]C2=CC=C(O)C=C2CO[C@@H1]1C3=C(O)C=CC(Cl)=C3O	True	307.71	3.21	3	5	1	79.15	0.754	No	0	Yes	3.71
C1C(N)CC1C(=O)OCOC(C)=O	True	187.19	-0.21	1	5	3	78.62	0.488	No	0	Yes	2.49
CC/N=C1\C(O)=C(O)\C1=N/CC2=CC=C(O)C(OC)=C2	True	276.29	0.71	3	6	4	94.64	0.766	No	0	Yes	3.16
O1COC(CO)[C@H1](O[C@@H1]2O[C@@H1](CN)[C@@H1](O)[C@H1](O)[C@H1]2N)[C@H1]1O[C@@H1](C)CNC(=O)[C@H1](CS(N)(=O)=O)NC(=O)CCNC(=O)[C@@H1](O)C(=O)N	True	689.7	-8.56	11	17	17	369.66	0.063	No	3	No	5.39
CC(CN1CC2C(CC1)CN(C3=CC=CC=C3)OCC(O)CNC(C)=CN=N2)(C)CO[C@H1]NC=CC4C=C5C6=CC=CC=C6C(=O)N5O[C@@]4O[C@@H1]O[C@@H1](CO)[C@H1](O)[C@H1](OCCCNC(=O)C7=CC=CC=C7)O[C@H1]OC	True	1039.2	5.03	6	19	25	239.2	0.048	No	4	No	7.15
C12C(O)C(=O)NCCC=C(CC[C@@H1](O)[C@H1](C)C3=CC[C@](C)C=C3)[C@@H1]C[C@@H1](O)C[C@@H1](CC=CC(=O)CCC)OOC=C1C2	True	583.77	4.93	4	7	10	125.32	0.212	No	1	No	6.3
C1C[C@@](C)(C(=O)OCCO[C@@H1]C2=CC=CO2)CC1=O	True	265.28	2.11	0	5	6	65.74	0.582	No	0	Yes	3.73
C12OC3=CC(N)=NC(NCC4=CC=C(OC)C=C4OC(C)C)=NC1=C2C3=S	True	384.46	2.22	2	8	5	90.46	0.757	Yes	0	Yes	5.44
CCC=C1C(I)=C(OCC=C(C)C)C(O)=C1C(=O)C=CI	True	512.13	5.3	1	3	6	46.53	0.299	No	2	No	3.98
C1N([C@H1]2CC3C=C(C4=CC=C(O)C=C4O3)C2=O)C1=O	True	257.25	0.72	1	4	1	66.61	0.753	No	0	Yes	4.69
BrC1=CC=CC(=CCC2=NC=C(C(F)(F)F)C=C)[C@@H1]2C1	True	344.17	5.24	0	1	2	12.36	0.607	No	1	No	4.81
C1CCCCCC2[C@H1]O[C@@H1](C(=O)NC3C=C(OC)C4=CC=CC=C4OC3=O)CCO[C@@H1]2C[C@@H1]1O	True	472.56	3.13	2	7	3	103.32	0.515	No	0	Yes	5.06
C1CC(=O)O[C@H1]C2C=C(C)C[C@@](C)(CO)[C@@H1]2OC(=O)[C@]O1	True	295.31	1.03	1	6	1	82.06	0.574	No	0	Yes	5.96
C1CC(=O)NC=CC=CC(OCCCC2=CC=CC=C2C3=CC4=CC=CC=C4N3CC(=O)OCC)=C1	True	484.6	5.68	1	5	9	69.56	0.313	No	1	No	3.45
C1N2CCN(C)C(=O)C2C1	True	140.19	-0.47	0	2	0	23.55	0.454	No	0	Yes	2.88
C1CCCC(=O)N(CCC(C)C)C1=O	True	197.28	1.96	0	2	3	37.38	0.648	No	0	Yes	2.05
O1[C@@H1]C2C[C@](C)O[C@@H1]1[C@@H1][C@]2OC	True	168.19	1.48	0	3	1	27.69	0.593	No	0	Yes	6.27
CC(CCO)N(C)C1=CC(OC)=C2C(N=C(N3)N2C=C(C(=O)OC(C)(C)C)C3=C1OC)CCC=O	True	488.59	3.46	2	10	10	114.62	0.38	No	0	Yes	5.86
C1OC(=O)[C@](C)CC[C@](C2)C1=CC[C@@H1]3O[C@@]3(C)[C@H1](OC)C=CC(=O)OCCO2	True	392.45	2.11	0	7	1	83.59	0.499	No	0	Yes	5.37
C1C(O)CO[C@H1](O[C@@H1]2C(CO)O[C@@H1]C=C(OC=C(C(=O)N[C@@H1](CCCNC(=N)N)C(=O)NCCCN3C=C(C4=CC=CC=C4)N=CC=C3)OC[C@@H1](O)[C@H1]OC(N)=N2)CO[C@@H1]1O)P(=O)(O)OC[C@H1]O[C@@H1]NC=NC=C(N)N=C	True	1104.08	-1.38	13	24	23	438.14	0.026	No	3	No	7.17
C1SCC2=CC=C(O)C=C2[C@@]1(C3COC3)O	True	238.31	1.47	2	4	1	49.69	0.778	No	0	Yes	3.72
O1/N=C/[C@H1](O)C[C@H1]C2[C@H1](OCC3=C[C@H1](OC(=O)C4=CC=CC=C4)C3)OOC[C@@]2(O)C1	True	418.42	1.17	2	9	5	116.04	0.416	No	0	Yes	5.66
O1C2=NC=CC=C2[C@@]1(O)[C@@](C)O	True	166.16	0.54	2	4	1	62.58	0.639	No	0	Yes	3.81
C12CCC=CC=CC(OCC3=CC(C(F)(F)F)=CC(F)=C3C(CCO)=C1C2)=O	True	396.38	4.95	1	3	2	46.53	0.568	No	0	Yes	4.22
O1/N=C/NCC=CC=CC(OCC2=CN=CN2CC3CCC(CCN4CCCCC4)CC3C)C=C1O	True	497.68	4.77	2	8	8	84.14	0.538	No	0	Yes	5.38
C1N[C@@H1]2C=CC(=O)[C@]21C	True	123.15	0.1	1	2	0	29.1	0.495	No	0	Yes	4.62
C12NC=CC(=O)C(CCC(C(=O)O)[C@@H1](CC(=O)OC)C)COC(C=C(OC(=O)C3=CC=CC4=C3O)C=C(O)C=C4OC(=O)C5=C(O)C=CC)=C5OC1=C2	True	731.71	3.63	5	14	8	228.36	0.148	No	2	No	7
O1CCN(C[C@H1]2O[C@H1](CO)[C@@H1](O)[C@@H1](O)[C@@H1]2)OC=NC(NC3=CC4=C(Cl)C=C3)=C1C=CC=C4C(=O)NCCCCCCO[C@H1]O[C@@H1](CO)[C@H1](O)[C@@H1](O)[C@@H1]	True	751.23	0.47	8	15	17	224.26	0.102	No	3	No	7.18
C=C=C/C=C/CCNCCN(CCCCC(=O)NCCCCCCCCCCCCC1=CC=C(Cl)C=C1)CCCC(C2=CC=CC=C2)OC	True	692.47	10.42	2	4	31	53.6	0.047	No	2	No	3.64
C#CCP(=O)(O)O	True	120.04	-0.2	2	1	1	57.53	0.372	No	0	Yes	4.18
NS(=O)(=O)C=1C=CSC=1	True	163.22	0.4	1	3	1	60.16	0.651	No	0	Yes	2.54
CC/N=C1\CC(CCC(C)C)N(CC2=CC=CC(O)=C2)C1O	True	304.43	3.18	2	4	6	56.06	0.848	No	0	Yes	3.78
O1C(=O)C2=CC=CC=C2[C@@]1C3=CC=CC(C(C)=O)=C3	True	251.26	2.99	0	3	2	43.37	0.608	No	0	Yes	2.39
CC(N)C(=O)N[C@@H1](CC1=CC=CC=C1)C(=O)N[C@@H1](CO)C(=O)N2CCC[C@@H1]2C(=O)N[C@@H1](CC(C)C)C(=O)NC(C)C(=O)N[C@@H1](CCCNCCNC)C=O	True	759.95	-2.16	9	11	24	253.19	0.041	No	3	No	4.53
CCN(C)C[C@@H1](NC(=O)[C@H1](C)CCN)C(=O)N1CCC[C@H1]1C(=O)O	True	342.44	-0.52	3	5	9	115.97	0.519	No	0	Yes	3.46
CCCCCCC1=CC(=O)C=CC1=O	True	192.26	2.59	0	2	5	34.14	0.495	Yes	0	Yes	2.38
O/N=C(\CNC1COC1)O	True	146.15	-0.68	3	4	3	74.08	0.213	No	0	Yes	3.42
O1C=C2C=CC(=CC2=C1OCC3=CC=CC=C3)CCOC4=CC=C5C(=C4)CCC5C=O	True	412.49	5.86	0	4	8	48.67	0.34	No	1	No	3.26
C1C2C[C@@H1][C@H1](/C=C(/C(C)C/C=C)/C(=O)OC)CC(C)[C@H1](OC(C)=O)[C@@H1](C)C(=O)O[C@@H1]12	True	419.54	4.05	0	6	6	78.9	0.28	No	0	Yes	5.52
OC(CC[N+1](C)([O-1])CCCCCCCCC)OOC(=O)CCCCCCCCCCCCCOP(=O)(O)OC[C@@H1]1CN(CC2=CC=C(Br)C=C2)C(=O)O1	True	837.83	9.46	2	10	33	164.12	0.017	No	2	No	4.7
O1CCNC1CCCOS(=O)(=O)O	True	211.24	-0.47	2	5	5	84.86	0.472	No	0	Yes	3.68
NS(=O)(=O)OC[C@H1]1O[C@@H1](N2C=CC(N)=NC2=O)[C@H1](O)[C@@H1]1O[C@@H1]CCOCCCCCCCC[C@@H1](C(C)=O)NC=O	True	590.68	-0.31	4	13	21	224.39	0.107	No	2	No	4.72
CNC(=O)C=C(C)OSC=O	True	175.21	0.49	1	4	4	55.4	0.292	No	0	Yes	4.05
C1C(CCC(=O)NO2)OC(=O)[C@]C[C@H1](O)[C@@](C)C[C@H1]21	True	268.29	0.33	2	5	0	84.86	0.618	No	0	Yes	6.48
CCC(=O)N[C@@H1](CC1=CC=CC=C1)C(=O)N(C)[C@@H1](CCCCN)C(=O)NCC(=O)O	True	420.51	0.28	4	5	13	141.83	0.338	No	0	Yes	3.08
CN1N=CC=C1C(=O)N2CCN(CC3=CC=CC=C3O)C2	True	286.34	1.04	1	5	3	61.6	0.916	Yes	0	Yes	2.41
C1N(C2=CC=C(C3=CC=CN=C3)C=C2)CCC1=O	True	238.29	2.53	0	3	2	33.2	0.806	No	0	Yes	2.02
CCC(=O)N[C@H1](CCN)C(=O)N[C@@H1](CC1CCN(C)CC1)CC(=O)N[C@H1](C(=O)N[C@@H1](CO)C(=O)N[C@H1]C(=O)N[C@@H1]2CCNC[C@H1]2C(=O)N(C)[C@@H1](CCCNC(C)=O)C(=O)N[C@H1]C(=O)O)C(C)CN(C)C(=O)[C@H1](C)NC=O	True	1079.27	-5.49	13	16	33	401.34	0.022	No	3	No	6.19
OC(CCCC#CCOC(=O)C1=C(O)C=C2C3=CC(C(=N)N)=C(O)C(O)=C3C(=O)C2=CC1=CCCC(O)C4=CC)(O)C(O)C(O)=C4O	True	650.64	1.83	11	13	1	275.31	0.052	Yes	3	No	5.99
O1[C@]C=C(O)C([C@H1](O)CC2C(C)(C)C(=O)[C@@H1]2CCC1C)OCO	True	326.39	1.59	3	6	2	96.22	0.667	No	0	Yes	5.83
C1C2=CCCC2N(COCCC(C)CCC)C1	True	237.39	3.58	0	2	7	12.47	0.495	No	0	Yes	3.83
CCC(=O)N[C@H1](C=O)C[C@H1](C)C(=O)N1CCC[C@H1]1C(=O)N[C@@H1](CCCCN)C(=O)N[C@H1]C(=O)N[C@@H1](C)C(=O)N2CCC[C@H1]2C(=O)NCCCC[C@H1](N)C(=O)N[C@H1]C(=O)N[C@@H1](CC3=CC=CC=C3)C(=O)N4CCC[C@H1]4C(=O)N[C@@H1]	True	1090.29	-2.12	10	14	31	362.84	0.022	No	3	No	5.96
C1CCCCCCCCCC1(CCCCO[C@@H1]O[C@H1](C)[C@@H1](OC(=O)C(OC)[C@@H1]O)[C@@H1](O)[C@H1](O)[C@H1])OCCCCCCCCCC(=O)O	True	672.9	6.47	4	10	26	161.21	0.059	No	2	No	5.56
C1SC2=NN=CN21	True	113.15	0.34	0	4	0	30.71	0.486	No	0	Yes	3.91
C1C=2NN=C(C=2CS[C@@H1]CCOCO)C[C@@H1](C)N(C)C(=O)[C@H1](CCCNC(=N)N)C(=O)[C@H1](C)C[C@H1](C)/C=C/C(=C/[C@@H1])[C@]1CCCC=C3CCCCN3CCCC	True	794.16	7.33	5	8	18	160.66	0.034	No	2	No	7
C1C2=CC(O)=C3C=C2N=C1C4=CC=CN=C4S3	True	240.29	2.93	1	4	0	45.48	0.77	No	0	Yes	4.07
C#1CC(=O)CC[C@](C)C(=O)C=C[C@]#1	True	175.21	1.46	0	2	0	34.14	0.522	No	0	Yes	5.01
OC(C1CCC(=O)CC1)[C@H1](C)C(=O)[C@@H1](C)/C=C/C(C)=O	True	280.36	2.09	1	4	6	71.44	0.756	No	0	Yes	4.19
C1C2C[C@@]3(C)CC[C@]2(O)[C@H1]13	True	138.21	1.56	1	1	0	20.23	0.538	No	0	Yes	5.5
C1CCN(CC2=CC=CC=C2)CCO1	True	191.27	1.91	0	2	2	12.47	0.708	No	0	Yes	1.53
C12CSC(N3CCC4=NC=CN4C)CC(=O)C5=C[C@]1(C)C3OC(C)C5C(O)C2(C)C=C(C)C	True	471.67	3.57	1	7	4	67.59	0.678	No	0	Yes	6.66
CC(O)C(O)CCCCCCCC1CC1CCCC[N+1]CCCC	True	340.57	4.67	2	2	17	54.56	0.378	No	0	Yes	4.28
FC(F)(F)C[C@@H1]C(=O)N[C@H1](C)C(=O)N(C)[C@@H1](CC(C)C)C(=O)N(C)[C@@H1](CC(C)C)C(=O)N[C@@H1](C(C)C)C(=O)O[C@@H1]C	True	592.7	3.26	2	6	16	125.12	0.265	No	1	No	4.63
CCNC(=O)[C@H1](CCCN=C(N)N)NC(=O)[C@H1](CC(N)=O)N(C)C(=O)[C@H1](CC1=CC=C(O)C=C1)NC(=O)[C@H1](CCCN)NC(=O)CC(C)(C)C	True	704.87	-1.54	9	9	21	290.45	0.04	No	2	No	4.24
O1CC2=CC=CC=C2C[C@H1]1C	True	148.2	2.15	0	1	0	9.23	0.547	No	0	Yes	2.55
CC(C1[C@@H1](O)CCCCCCCCCCCCCC(C)OC2C(O)CC(=O)O2)OCO1	True	444.61	4.22	2	7	17	94.45	0.256	No	0	Yes	4.41
C1CCCN(C)CCCCCCCCC(=O)NC2=CC3=C(C=N2)[C@](O)(O3)C(=O)N4CCC[C@H1]4C(=O)O1	True	502.61	2.55	2	8	0	121.3	0.519	No	1	No	5.43
C12NC(=O)C(CC)(C3=CC=C(C)C=C3)C(=O)N[C@H1]C4C[C@H1](C1)[C@H1]42	True	311.41	2.08	2	2	2	58.2	0.822	No	0	Yes	5.06
C1NN=C(C2=CC=CC=C2CC3=CC=CC=C3O)[C@H1]1NC(N)=O	True	310.36	1.33	4	4	4	99.74	0.685	No	0	Yes	3.2
CN(CC[P+1](C)(C)C)CC1=CC=CC=C1	True	224.31	3.03	0	1	5	3.24	0.695	No	0	Yes	2.59
COC(=O)CCCCCCC1CCNC2CC(C3=CC=CC(Cl)=C3O)C=C([C@@H1]COC(=O)[C@H1]2OCN)CC[C@H1](OCCCC)CN(/N=C/C4=C[NH1]C5=CC=CC=C45)C[C@H1](O)C[C@@H1](C1)N(C)CCC	True	964.71	8.63	5	13	19	184.2	0.033	No	3	No	6.95
CNC1CC=C[C@@]1(C=CC(C)(C)O[C@H1]CC2=CC=CC=C2C)CC(=O)O	True	356.49	4.06	2	3	9	58.56	0.655	No	0	Yes	4.54
C1N(C)C(=O)C=CC=C1/C=C/[C@@H1](O)[C@@H1](O)C(=O)N(C)[C@H1](C)[C@H1]CCCNC(=O)C2=CC(=O)C(=O)C(Br)=C2O	True	593.45	0.41	4	8	11	164.55	0.152	Yes	1	No	5.03
C1C(O)CN(CC2=CC=C(Cl)C(Cl)=C2)CC[C@H1]1F	True	292.18	3.29	1	2	2	23.47	0.904	No	0	Yes	2.96
CS(=O)(=O)N1CCN(C(=O)C(=O)NC2=CC=CC3=CC=CC=C23)CC1	True	361.42	0.88	1	4	2	86.79	0.805	No	0	Yes	2.06
C1CC(=O)[C@](O2)OC[C@](C)(CCC3=CCC3)[C@@H1]2CC[C@@]1C	True	290.4	4.14	0	3	3	35.53	0.733	No	0	Yes	5.76
OC(CCC1=CC(O)=C2C=CC=C(O)C2=C1)OC(=O)CCCCCCC/C=C\C/C=C\C/C=C\CC=CC(C(O)(C3=CC=CC=C3)C4=CC=CC=C4Cl)=CC(O)=C	True	791.43	11.76	5	7	23	127.45	0.013	No	2	No	4.57
O1CCCC2=CC=CC=C2[C@@H1]1C3=CC=CC(OCC4=CC=CC=C4)=C3	True	330.43	5.32	0	2	4	18.46	0.645	No	1	No	2.44
NS(=O)(=O)CCOC1[C@H1]O[C@@H1](NC(=O)CC/N=C(/N)NC)O[C@H1](O)[C@H1]1O	True	398.42	-4.13	6	9	8	207.82	0.172	No	1	No	5.01
C1[C@@H1]2CC[C@H1]1N2C3CCOCC3	True	167.25	1.4	0	2	1	12.47	0.585	No	0	Yes	3.93
O1C(C2CCN(C(=O)CC=CN(C)C3=CC=CC=N3)C2C)C1	True	301.39	2.06	0	4	5	48.97	0.781	No	0	Yes	4.18
C1CCCCCCC[C@H1](O)C=CC2=CC(N(CC3=CC=CC=C3)C4CC4)=NC2=C1CCC(=O)O	True	462.63	6.16	2	4	6	73.13	0.531	No	1	No	4.05
CCO[C@H1]CCCNC[C@@H1](N(C1CC)NCC)CC(=O)C[C@H1](O)C[C@@H1](O)CC(=O)OOCO[C@H1][C@@H1](O)[C@@H1]2C[C@@H1](O)CC[C@]2(C)[C@@](C)(O)CCC(O)CC(O)C[C@@H1](C)C(=O)OC(C)CC[C@@H1]1OC(C)C(OS(=O)(=O)O)[C@@H1](O)C	True	1132.41	2.26	11	23	17	359.33	0.043	No	3	No	7.65
CC=C1C(OC(C)=O)=C(C(C)=O)C=C1C=CC(Cl)=CC(O)=CC(=O)C=C(O)C(OCOC)=CO[C@@H1]O[C@@H1](C2OC(=O)CCCC3=CC=CC=C3)[C@H1](OC(=O)/C=C(\C)C(C)=O)[C@@H1](C)O[C@@H1]C[C@@H1]2OC=C	True	977.45	8.27	2	17	25	225.95	0.018	No	3	No	6.38
C12C(O)CC3[C@](C)C(C1=O)OC(=O)C4=COC(=C4)C5=CC=CC=C5OC23C	True	367.38	2.8	1	6	0	85.97	0.721	No	0	Yes	6.28
N#C/C(=C\C=CC=C[N+1][C@H1](/C=C/C1=CC=CC=C1)CCCC)C=C	True	317.46	5.57	0	1	10	37.89	0.41	No	1	No	4.23
C#CCOC1=CC=CC=C1	True	132.16	1.7	0	1	2	9.23	0.556	No	0	Yes	1.75
C1OC(=O)C=CC=C([C@H1]O[C@@H1](CCCCNC(C)=S)[C@@H1]OC)C=C1	True	351.47	3.04	1	5	10	56.79	0.371	No	0	Yes	4.96
C1C(N)C(=O)O[C@](C)CC2=CC=C3C=C2N[C@]3(OC(C)=O)C[C@H1]1C	True	331.39	2.22	2	6	1	90.65	0.767	No	0	Yes	5.94
C1C(=O)N[C@H1]1[C@H1](O)[C@@H1](C)O	True	145.16	-1.38	3	3	2	69.56	0.419	No	0	Yes	3.89
O/N=C(CC1=CC=CC=N1)C(=O)O	True	180.16	0.54	2	4	3	82.78	0.404	No	0	Yes	2.52
CNS(=O)(=O)C=1SC=CC=1C	True	191.28	0.96	1	3	2	46.17	0.757	No	0	Yes	2.54
CCCCCCCCCCC(=O)N[C@@H1](C)C(=O)O	True	257.37	3.11	2	2	11	66.4	0.559	No	0	Yes	2.23
N1C(CC2=CC=CC(Cl)=C2Cl)C3C(=O)NC[C@@H1](OCCCN4CCC5=CC=CC=C5C4)C/C(=C/C6=CC=C(O)C=C6)[C@H1](C(=O)N1C)C=CC3	True	703.71	6.2	3	6	8	94.14	0.191	No	2	No	5.74
CS(=O)(=O)CCCCCCC(N)=O	True	207.29	0.47	1	3	7	77.23	0.616	No	0	Yes	2.03
C12CC[C@@H1]1[C@@H1]3CC[C@@H1]4[C@](C)(CO)[C@@H1](O)CC[C@]4(C)[C@H1]3CC[C@@]2C	True	319.51	4.2	2	2	1	40.46	0.76	No	0	Yes	4.57
C1CC=CC2(CCCCN2C(=O)OC(C)(C)C)C3=CC=CC=C13	True	313.44	4.81	0	2	0	29.54	0.644	No	0	Yes	3.65
O1C(CCS[C@@H1]2O[C@H1](CO)[C@@H1](O)[C@H1](O)[C@H1]2OO)[C@H1]C3C[C@](C)(CO)CO[C@@H1]3C[C@@H1]1O	True	453.53	-0.88	6	11	7	158.3	0.21	No	2	No	5.67
CCC#CC[N+1](C)(C)CCCCCCCCC(=O)OCCCCN(C)C	True	367.6	4.09	0	3	15	29.54	0.189	No	0	Yes	2.87
CC(O)CC/C=C\CC12C[C@@H1][C@@H1](O)[C@@H1]1C[C@@H1](C)C2	True	251.39	3.1	2	2	5	40.46	0.737	No	0	Yes	4.94
COC(=O)CN/C=C1\CCCC1	True	169.22	1.21	1	3	3	38.33	0.645	No	0	Yes	2.81
C1C(=O)NC2C[C@@H1][C@@H1](CC[C@@H1]2[C@H1](C)CC3C[C@@](C4)[C@@H1](O)[C@H1]5CC[C@@H1](C(C)(C)O)C[C@]5(C)C4=NC[C@]31)C	True	497.74	5.11	3	4	1	81.92	0.471	No	1	No	7
C=1=CC(=O)C[C@]2(C)[C@@H1]CC[C@]2(O)[C@@H1](O)[C@]=1C	True	221.28	1.16	2	3	0	57.53	0.603	No	0	Yes	5.54
CCC/C=C\CCCCCCCC(=O)O	True	212.33	4.16	1	1	10	37.3	0.436	No	0	Yes	2.07
O/N=C(\CCCNC(=O)C1=NN=C(S2C)O1)CC=C2	True	284.34	1.32	3	6	0	100.61	0.379	No	0	Yes	5.98
CCN(C=C1C(NC(=O)C2=CC=CC=C2)=CC=C1O)C(F)(F)F	True	324.3	3.48	2	3	4	52.57	0.834	No	0	Yes	3.13
C/C(=C\C1NCCC[C@@H1]1C2=CC=CC=C2OCC)C(=O)O	True	289.38	2.95	2	3	5	58.56	0.818	No	0	Yes	3.38
C1N(C)C=CC(O[C@H1]([O-1])[C@@H1](C)[C@H1](O)[C@H1](C2)O)=CCC3=C([NH1]C4=CC=CC=C43)C(O)=C2C(=O)C[C@@H1]1C	True	481.57	2.38	4	7	0	129.08	0.455	No	0	Yes	6.22
C1CCCCC2CC(=O)NC=CC(C3=CC=CC4=CC=CC=C34)=NC(=O)[C@]12	True	359.45	4.34	1	2	1	58.53	0.823	No	0	Yes	3.91
C1C2(O)C3OC3(C)C(O)OC2(C)CCCC1O	True	244.29	-0.08	3	5	0	82.45	0.519	No	0	Yes	5
C1O[C@@H1]2CCCCN2C[C@H1]C3[C@](C)[C@@H1](C[C@@H1](O)[C@H1](C)C[C@H1](C)CC(=O)O)OC(=O)[C@@H1](OC(=O)C4=CC=CC=C4)[C@@]31C	True	571.71	4.29	2	8	9	122.6	0.418	No	1	No	5.12
O1C2(CCN(C(=O)C(C)C3OC3)CC2C)O1	True	227.26	0.55	0	4	2	57.9	0.51	No	0	Yes	4.7
C1CCCCCCCC(=O)NC(CC(C)C)C(=O)N(C)CC(=O)NC2=CC=CC=C2CS1(=O)=O	True	493.67	3.27	2	5	2	112.65	0.657	No	0	Yes	3.76
CCC(=O)N(C)[C@@H1]1CCN(CC2=CC=CC(Cl)=C2)C[C@@H1]1CC(=O)N[C@@H1](CC(C)C)C(=O)O	True	466.02	3.4	2	4	10	89.95	0.552	No	0	Yes	3.48
C/C(=C\C1NC(=O)CNC=CC=[N+1]([O-1])C=CC=C2C=C)C3=CC=CC=C3C2=C1	True	373.46	3.3	2	3	1	67.2	0.586	No	0	Yes	5.79
O1[C@@H1]2C(=O)N(C)[C@@H1]2CO[C@H1]1C3=CC=C(Cl)C(Cl)=C3	True	288.13	2.25	0	3	1	38.77	0.744	No	0	Yes	3.62
CC(=O)N1CCC(C2C=C(C)COC=C(C)C(O)=CC(O)=C)CCC[C@]12C	True	375.51	4.79	2	4	6	70	0.398	No	0	Yes	5.55
COC1C2OCCNC(=O)C=CC=CC=C(C3=CC=C(OC(F)(F)F)C=C3)NC=NC(=C(C4=CC=C(O)C=C4)OC5=CC=CC(=C5)C[C@@H1](NCCCCCCCCCO)[C@H1]1OC2C)CCC(=O)C(O)C(O)C(CCCCCCCC)O	True	1135.37	9.53	8	15	27	229.89	0.033	No	4	No	7.68
CS(=O)(=O)NC[C@@H1]1[C@H1](C[C@H1]1C2=CC=C(Cl)C(F)=C2)S(=O)(=O)CC	True	383.89	1.94	1	4	6	80.31	0.814	No	0	Yes	3.77
C1CNC(=O)C2=CC3=CC=C2[C@@]1C4=CC=CC=C4NC(=O)OCC3	True	321.36	2.9	2	3	0	67.43	0.784	No	0	Yes	4.46
CC(NC(=O)[C@@H1]1CC[C@H1](CCCCCCCC)C1[C@H1](C)C=O)OC(=O)OC	True	383.53	4.46	1	5	12	81.7	0.233	No	0	Yes	4.29
C1CN(C(=O)[C@@H1](NC(=O)OC(C)(C)C)C(F)(F)F)CCCC=NC(OC)=C(C(=O)CC2=CC=CC=C2)NC1=O	True	554.57	3.27	2	7	6	126.4	0.556	No	1	No	4.16
C=C=N\OCC=CC=C(C1CCCN1CC2=CC=CC=C2)C=C	True	308.43	4.11	0	3	8	24.83	0.312	No	0	Yes	3.88
CCNC(=O)[C@H1](CCCCCCCCCCC)OC(=O)C1=CC=C(C=C1)C2=C3C=C(C(=O)O[C@H1]3[C@]4CCC5CC4CC5(C)CCCCCCCCCC6C=CN[C@@H1]C78CCN(CC7)CO8)[C@@H1]6O[C@](C)(C=O)[C@@H1]2	True	991.39	12.06	2	10	20	132.5	0.074	No	2	No	6.34
C=12COCC[C@H1][C@H1]CC3=CC(=O)C=C[C@]3(C4)[C@@]=1C[C@H1]2O4	True	270.33	2.36	0	3	0	35.53	0.634	No	0	Yes	6.87
C1CC(=O)O[C@@H1]2C[C@H1]2[C@H1]3O[C@]3(CO)[C@@H1](O)[C@H1](OC(=O)CCCCCCC)[C@@](O)[C@@H1]1OC(=O)C=CC(NC(=O)C4=CC(Cl)=COCC=C5N[C@@H1]C6[C@H1]C7CC[C@@H1](C6)N7CCCNC8=CC=C(F)C(Cl)=C8)C(F)=C5O4	True	1060.99	6.53	6	16	19	226.98	0.028	No	4	No	6.73
C=1[C@@H1]2OC(=O)C(=C)[C@H1]2CC[C@@]=1C	True	164.2	1.82	0	2	0	26.3	0.31	No	0	Yes	3.78
C12[C@H1]CNC(=O)[C@@]3(CCCN3C(=O)[C@@H1]4CCCN4C1C)N2C(=O)NCC5=CC=CC=C5	True	424.53	1.09	2	4	2	84.99	0.744	No	0	Yes	5.6
C1C2=CC(N)=CC=C2N(C(=O)OCC3=CC=CC=C3)C1	True	268.32	2.97	1	3	2	55.56	0.852	No	0	Yes	1.94
CC1=CC(CC2=CC=C(F)C=C2F)=NC1=O	True	221.21	2.43	0	1	2	29.43	0.754	No	0	Yes	2.87
CCO/C(=N/C1=CC=C(C)C=C1C(C)(C)CN)C(=O)CCP(=O)(O)OP(=O)(O)OC2=CC=CC=C2	True	526.46	4.64	3	8	12	157.74	0.204	No	1	No	4.11
C12C=C(N3)C=CC=C(NC(=O)/C(C)=C/CNC1=O)C3=N2	True	270.29	-0.11	3	4	0	82.59	0.574	No	0	Yes	5.89
CC(C1=CC=CC=C1)N(S(=O)(=O)C2=CC=C(N)C=C2)C(C)(C3=CC=CC=C3)C4=CC=CC=C4	True	456.61	5.98	1	3	7	63.4	0.348	No	1	No	2.87
CCCCCCCCCCO	True	158.28	3.12	1	1	8	20.23	0.538	No	0	Yes	1.6
C1CC[C@@H1]1CCC(=O)OC2C=CC3=C(C(=O)C=C4C5=CC=CC(OC)=C5OC4=CC6[C@H1][C@@H1]7CC(C)(C)CC[C@]7(C(=O)O)[C@@]6)CCC=CC3=C2	True	661.82	7.02	1	6	9	103.04	0.288	No	2	No	5.67
O[C@H1]1CCN(CC2=CC=CN=C2)C[C@H1]1C(=O)O	True	236.27	0.35	2	4	3	73.66	0.792	No	0	Yes	2.89
CC/N=C/C=C/[C@H1]1O[C@@H1]1CCCCCC2CCCCCC3C[C@H1](NC(=O)COC4=CC(O)=CC(=C4)CO[C@H1]2C=CC([C@@H1](OC(C)=O)C(C)C(=O)C(C)C)C=C3CC)OCC	True	835.14	9.4	2	10	17	145.28	0.052	No	2	No	7.55
CCC(=O)OC	True	88.11	0.57	0	2	1	26.3	0.438	No	0	Yes	1.95
C12S(=O)(=O)C=CC(CC3=CC(=O)OC4=CC=CC=C4C3)=CC=C1C2=O	True	354.38	2.21	0	5	2	77.51	0.601	No	0	Yes	4.26
C1C=C2C=C(NC(=O)NC3=CC=C(I)C=C3)C(O)=C12	True	366.16	3.45	3	2	2	61.36	0.703	No	0	Yes	3.02
C123CNN=C(C(=O)N4CCN(CC5=CC(F)=CC=C5F)CC4)C1=C2C3	True	344.37	1.27	1	4	3	47.94	0.898	No	0	Yes	4
NC(=O)C1NC=C([N+1](=O)[O-1])N=C1O	True	186.13	-1.52	3	5	2	130.85	0.356	No	0	Yes	4.54
C12OC3=CC=C(Br)C=C3C1=C2O	True	225.04	2.49	1	2	0	29.46	0.734	No	0	Yes	3.33
CC(CCC(=O)NCC1=CC=CC2=CC=CC=C12)C=O	True	269.34	3.07	1	2	6	46.17	0.819	No	0	Yes	2.48
C1OC(=O)N[C@@H1](CC(C)C)C(=O)NCC(=O)N[C@@H1](C)C(=O)N[C@@H1](CO)C(=O)N[C@@H1](CC2=C[NH1]C3=CC=CC=C23)C(=O)N1CC(=O)N[C@@H1](CC(C)C)C(=O)N4CCC[C@H1]4C(=O)N[C@@H1](CCCNC(=N)N)C(=O)N5CCC[C@H1]5C	True	1079.27	-1.49	12	13	18	371.78	0.046	No	3	No	6.21
C/C(=C/CSC1=CC=C(C)C=C1CCCOCCO)C(=O)OC	True	338.47	3.15	1	5	10	55.76	0.307	No	0	Yes	2.67
C1C2=CC=CC=C2N1C(=O)CCO	True	177.2	0.92	1	2	2	40.54	0.729	No	0	Yes	2.09
O1C(CNC(=O)C2=NC=CS2)CC1	True	198.25	0.66	1	4	3	51.22	0.776	No	0	Yes	2.86
C12CC(=O)/N=C(OC=CC=C(S(=O)(=O)O)C=CC(S(=O)(=O)O)=C1OC)C=C2	True	417.42	1.11	2	7	3	156.63	0.642	No	0	Yes	5.73
CCOC(=O)CC1C(=O)NC1	True	157.17	-0.31	1	3	3	55.4	0.451	No	0	Yes	2.97
CC=C1C(O)=C(C(C)=O)C(O)=C1/C=C(\C#N)C(=O)N2CCN(C3=CC=CC(C(F)(F)F)=C3)CC2	True	473.45	3.98	2	6	4	104.87	0.506	No	0	Yes	3.2
C1N(CC(=O)N[C@@H1]2CCCC[C@H1]2C(=O)NCCN)OC(=O)C3=CC4=CC=CC=C4C=C3O1	True	440.5	1.31	3	7	6	122.99	0.619	No	0	Yes	3.68
C1CCN(S(=O)(=O)C2=CC=C(O)C(O)=C2C)CC1	True	271.34	1.58	2	4	2	77.84	0.801	Yes	0	Yes	2.19
C12CC(=O)NC=CN(S(=O)(=O)C3=CC=C(C)C=C3)C=CC1=CC[C@@H1]4[C@@]5(C)CC[C@H1](O)C(C)(C)[C@@H1]5CC[C@@]4(C)[C@]2C	True	565.8	6.25	2	4	2	86.71	0.444	No	2	No	5.37
C1C(N)C(=N)NC(=O)NC(C)(C)C(=O)NCC(=O)N[C@@H1](C)C(=O)N(C(C)C)N(C)C(=O)[C@@H1](C)C(=O)N1	True	511.58	-2.63	7	8	1	218.92	0.185	No	2	No	5.34
CN(C)C(N)=O	True	88.11	-0.37	1	1	0	46.33	0.431	No	0	Yes	2.05
C1N(CC(=O)OCC2=CC=C(Cl)C3=C2)C[C@H1]4CN(CC5CN=N1)[N+1](=C4C3)[C@H1](O)CN5C(=O)OCC6=CC=CC=C6	True	568.05	2.3	1	9	2	110.28	0.438	No	1	No	6.8
C1S(=O)(=O)C=C2C=C(CC[C@@H1]2C3=CC(O)=CC=C3O)C1=O	True	306.34	1.78	2	5	1	91.67	0.772	No	0	Yes	4.55
C1C2(O)[C@@H1]CC3[C@@](C)C[C@H1](O)C4C5[C@H1](C)O[C@]5(OC2=O)[C@]13CC6=CC(O)=CC=C64	True	398.46	2.01	3	6	0	96.22	0.579	No	0	Yes	7.15
CCC(=O)OCC1=CC=CC=C1	True	164.2	2.14	0	2	3	26.3	0.64	No	0	Yes	1.43
C1CN=C(SC)N=CN=C1	True	155.23	1.21	0	4	0	37.08	0.518	No	0	Yes	4.34
CC(=C(C)CCNCCCN=C(N)NCC)CCC(=O)OCC	True	326.49	1.96	3	4	12	88.74	0.168	No	0	Yes	2.9
C=1C=CC(O)=C([C@H1](O)CC(C)(C)OP(=O)([O-1])C[C@H1](O)CC(=O)OCC)CC(C)C=C=1	True	443.45	2.52	3	8	10	136.35	0.266	No	0	Yes	5.92
C1OC=C([C@@H1](O)[C@H1](OC(C)=O)C[C@@H1]C(C)(C)OC)C=C(C(C)=C(OC)C1)OC(C)(C)C2=CC=CC=C2	True	501.64	5.36	1	7	11	83.45	0.409	No	2	No	5.03
O1C(C2=CC=CC(OCC3CC3)=C2Cl)(CC1)CC	True	266.77	4.15	0	2	5	18.46	0.797	No	0	Yes	3.19
N1C(=O)[C@H1]NC(=O)[C@H1](C(N)=O)NC(=O)[C@@H1]CSSC[C@H1](NC(=O)[C@@H1](CC2=CC=CC=C2)NC(=O)OCC3=CC=CC=C3C4=CC=CC=C4)C(=O)C[C@@H1]OS1	True	793.93	2.34	6	12	9	224.12	0.08	No	3	No	5.4
C1NC2CC3=CC=CC=C3[C@]2NC(=O)N4CCCCNC(=O)[C@](O)=C1OC5=CC=CC(=C5)CC/C4=N/OCC6=CC=C(CC)OC=C6	True	638.75	4.89	4	8	4	133.75	0.351	No	1	No	6.28
CNC(=O)C[C@H1](O)C(C1=C(Cl)C=CC=C1Cl)OCC2=CC=CC(O)=C2C(=O)O	True	428.27	3.15	4	5	8	116.09	0.514	No	0	Yes	3.47
C12C(O)CC3[C@@H1][C@H1](CC[C@]OC[C@]4COC4[C@H1])[C@@H1]1[C@H1]32	True	260.33	1.58	1	3	6	38.69	0.737	No	0	Yes	6.42
C1[C@H1]C2N(C3C=C(C)C(=O)C3=C2O)C[C@H1](OC(=O)C4=CC(OC)=C(OC)C(OC)=C4OC=C)CCC(O)=C1Br	True	605.46	4.71	2	10	7	123.99	0.334	No	1	No	5.27
CN(CC#CCN1CCOCC1)C2=CC=CC=C2	True	244.34	1.46	0	3	3	15.71	0.749	No	0	Yes	2.41
O1CCNC(=O)[C@H1](CC2=CC=C(NS(=O)(=O)C3=CC=CC=C3)C=C2)OC(=O)C=C4C=C(C=O)C(C(N)=O)=CC(O)=C14	True	579.59	1.33	4	9	7	191.19	0.277	No	1	No	4.37
C1OC=C(COCC=CC=NCO)C=C(O)C(O)=C1C(COC(=O)C(C)(C)C)C(O)CC2(O)CCC[C@@H1](O)C2(C)C	True	581.7	3.01	6	11	12	178.5	0.114	No	3	No	5.5
C12NC=NC([C@@](N3)(CCOC3)CC(=O)N1CC)=N2	True	251.29	-0.74	2	6	1	78.32	0.643	No	0	Yes	6.18
C1CC[C@]1(O)C2=CC=C(C)C=C2	True	162.23	2.37	1	1	1	20.23	0.672	No	0	Yes	1.87
C1N(CCCCNCCN(CC(=O)O)CCOC)C(=O)C=CN=C(C=C2N=C(N)C=CC2=CO)C=C1	True	500.6	-0.5	4	9	14	153.61	0.248	No	1	No	4.31
C1CC2=C1C(=O)N(CC3=CC=CC=C3)N=C2C4=CC=CC=C4	True	288.35	3.06	0	3	3	34.89	0.742	No	0	Yes	1.97
CC(=O)NC[C@H1](NC(=O)[C@H1](CC1=CC=C(F)C=C1)NC(=O)[C@@H1]2CCCN2C(=O)[C@H1](CO)NC3=CC(C#N)=CC4=CC=CC=C34)C(=O)O	True	646.68	1.05	6	8	13	200.96	0.157	No	2	No	3.93
C1C=CC(C)=CC(OCC=CC(C2)=CN=CC=C2C3=CC=CC=C3)=CC=C1	True	355.48	6.35	0	2	5	21.59	0.603	No	1	No	4.12
C1CN2N=C(NC(=O)NCC3=C(F)C=CC4=C3CCO4)C=C2C(=O)N(C)[C@@H1]1C(=O)O	True	417.4	1.21	3	6	4	125.79	0.687	No	0	Yes	3.5
C1N(C)C(=O)C=CC=CC(NN=C(C)C=C[C@@H1](N2)CC2)=C(C)C=C[C@@H1]1OCCCC	True	412.58	3.47	2	5	8	65.96	0.364	No	0	Yes	5.05
O1C(=O)CC[C@]1(C)C	True	114.14	1.1	0	2	0	26.3	0.441	No	0	Yes	2.68
C=C(OC1=CC2=CC=C1C(=O)OC3=CC(Cl)=CC=C3O2)Cl	True	323.13	4.84	0	4	2	52.58	0.633	No	0	Yes	4.25
O1CCCNC=C(C2CCN(CC3=CC=CC(C(F)(F)F)=C3)C2)C(=O)[NH1]C1=CC	True	409.45	3.4	2	4	3	53.6	0.804	No	0	Yes	4.1
C1=2CCCC3=CC(=O)C=CC3(C)C1CCC=2C	True	228.33	3.97	0	1	0	17.07	0.573	No	0	Yes	3.83
C1CCC=CC=C(OC(=O)C2=CC=CC3=C2)C=CC=C13	True	264.32	3.31	0	2	0	30.21	0.73	No	0	Yes	4.43
C1CC(=O)NCN2C(=O)C=C3C=C(C=C(C(O)=C3C2)CC[C@](C)(O)/C=C/C4=CC=C(O)C)C4C1=O	True	478.55	2.98	4	6	1	127.17	0.429	No	0	Yes	6.61
CC(C)CC1CCC(C)(CC(C)C)C1=O	True	210.36	4.06	0	1	4	17.07	0.683	No	0	Yes	3.8
C1C(=O)C=C(OC)C1=O	True	126.11	0.06	0	3	1	43.37	0.466	No	0	Yes	3.16
C12C(O)[C@H1]C[C@@H1](O3)[C@](C)CC[C@H1](C(=O)O)[C@](O)(O)C(S3)C(=C1)C2	True	342.41	1.07	4	6	1	107.22	0.321	No	0	Yes	7.01
C1C=CC=C1NC(=O)/C=C/C2=CC(Cl)=CC=C2O	True	261.71	3.02	2	2	3	49.33	0.822	No	0	Yes	2.79
CCC1CCCC(=S)N=CC2=CC=CC=C2N=C1	True	258.39	4.35	0	2	1	24.72	0.687	No	0	Yes	4.26
CCCCCCCNC(=O)CNC(=O)CN1C=CC=N1	True	280.37	1.09	2	4	10	76.02	0.63	No	0	Yes	2.06
C1C2NCCC3=CC=C(C(O)=C31)CCCC2	True	217.31	2.18	2	2	0	32.26	0.698	No	0	Yes	4.58
C=1C=NN(CC2=CSC(N)=N2)C=1	True	180.24	0.97	1	5	2	56.73	0.749	No	0	Yes	2.47
CCCCCCC/C(C)=C\C(F)(Cl)Cl	True	241.18	5.39	0	0	7	0	0.318	No	1	No	2.8
C1CC2(O)CO[C@@H1]O[C@](C)CC[C@H1]1O[C@@]2	True	212.24	1.43	1	4	0	47.92	0.66	No	0	Yes	6.85
C=1CC(=O)OCCC[C@](C)C(=O)C=C[C@]=1	True	206.24	1.79	0	3	0	43.37	0.567	No	0	Yes	4.66
C1C=C(C)C(CCCOC(=O)OCCOC(=O)NCCCCCC)C=CN1C	True	396.53	4.25	1	6	12	77.1	0.302	No	0	Yes	3.53
CCN1CCC2C1CN(CC(Cl)C(N)=O)C2=O	True	259.74	-0.37	1	3	4	66.64	0.701	No	0	Yes	4.11
O1/N=C\C=C(CF)N=C(C)C1=O	True	170.14	0.84	0	4	1	51.02	0.547	No	0	Yes	4.37
C1N(CC2=CC=NC=C2OCC)C[C@H1]1C3=CC(F)=C(Cl)C=C3F	True	338.78	4.01	0	3	5	25.36	0.77	No	0	Yes	2.48
N#CCCC(=O)NC[C@@H1](C1=CC=C(C)C=C1)P(=O)(O)C(F)(F)F	True	348.26	3.25	2	3	6	90.19	0.772	No	0	Yes	3.65
C1N(C)C(=O)[C@]2(C)C=C1CC(N(C)CCC3C(C)CCCN3)C2=O	True	333.48	1.44	1	4	4	52.65	0.625	No	0	Yes	5.54
CCNC(=O)CNC1CCC(CC[C@]1(C)C2=CC3=C(F)C=C2F)OC(=O)C4=CC=CC(=C4OCO)OCO3	True	534.56	3.17	3	8	6	115.35	0.383	No	1	No	5.98
CC(CC1=C[NH1]N=N1)O[C@@H1](NC(=O)CN2C=CN=C2)C(C)C	True	306.37	0.75	2	6	8	97.72	0.701	No	0	Yes	4.22
C12CN/C=N/C=C(C)N(CC3=CC=CC=C3)C=CC=CC1=N2	True	292.39	2.87	1	4	2	39.99	0.91	No	0	Yes	4.41
O1C[C@H1](O)CC[C@](C2)[C@@H1]3CC[C@H1]([C@@H1](C)[C@@H1]4CC[C@@H1](C)[C@H1](C)C4)C(O)=C2[C@@H1]3O1	True	377.55	4.98	2	4	2	58.92	0.666	No	0	Yes	6.83
CN(C1=NC=CC=N1)[C@@H1](C(=O)NCC2=CC=CC=C2)CCNC(=O)N3CCOCC3	True	412.49	1.03	2	6	8	99.69	0.672	No	0	Yes	2.99
CCOC(=O)/N=C(\N)C=CC1=C(N(C)C)CCCC1=CC	True	291.39	3	1	3	4	67.92	0.638	No	0	Yes	3.64
CCC(C#N)(CCN1CCC[C@@H1](C(=O)NCC2=CC=CC(Cl)=C2Cl)C[C@H1]1COCCOC3C)CCCC3	True	552.59	6.39	1	5	4	74.59	0.469	No	2	No	4.51
C1C(O)C2=C3[C@@H1](O)C[C@@H1]C=C(OS(=O)(=O)[O-1])C=CC4=CC(C)=CC=C4O[C@@](C)([C@@H1](O)C5=CCCCC5)[C@H1]1OC3(C)C2=O	True	600.69	3.12	3	10	4	162.65	0.266	No	1	No	7.03
OC(C1=CC=C(Cl)C(Cl)=C1F)Cl	True	229.46	3.36	1	1	1	20.23	0.578	No	0	Yes	3.23
C1C=CC(C)=CC2=NN=C(N2C)C=CC1=CC3=CC(O)=CC(O)=C3C(=O)O	True	365.39	3.38	3	6	2	108.47	0.753	No	0	Yes	4.85
C1C=CC=C(O)C1C(=O)N[C@@H1](CC2=CC=CC=C2)C(=O)NC3=CC=CC=C3OC=C	True	404.47	3.89	3	4	8	87.66	0.583	No	0	Yes	3.41
CC(CCCCCCCCCCCC(=O)N1C=C(CCOCC2=CC=CC=C2)N=N1)[C@H1](CO)[C@@H1](O)[C@H1](O)[C@H1]O	True	546.73	4.47	4	9	22	137.93	0.159	No	1	No	4.29
O1C(O)C[C@H1]1[C@H1]NC(=O)CNC(=O)CC[C@H1]NC(=O)CNC(=O)[C@H1]COCC2OCCNC(=O)CCCCCCC(=O)N[C@H1](C(=O)N[C@@H1](CC3=CC=CC=C3)C(=O)N[C@@H1](C)C4=CC=C(O)C=C4OC5=CC=CC)C5C(=O)O[C@H1]2	True	1087.19	0.71	10	16	18	336.48	0.073	No	3	No	6.89
OC(CCCN1CCCC1=O)C(=O)O[C@H1]C=C(CCCC2)CC(C)C(=O)O[C@@H1]2[C@H1](OC(=O)/C(C)=C/C)CO[C@](C)O	True	579.69	3.67	2	10	13	148.9	0.188	No	1	No	5.42
FC(F)(F)C(F)(F)C(F)(F)C(F)(F)F	True	238.02	3.38	0	0	1	0	0.614	No	0	Yes	2
C1N(CCCNC(=O)[C@H1](CC2=CC=CC=C2)NC3[C@H1](C4=CC=CC=C4)O[C@H1](C5=CC=CC=C5)NC3=N[NH1]C6=CC=CC=C6)C=C1	True	600.77	5.38	4	6	13	90.02	0.122	No	2	No	4.17
C1CC(=O)N(CCCCCCC(C(=O)NCC(=O)O)C(=O)OCCCCCC)C2C(=O)O[C@H1]CO[C@](C)CC3C=C([C@](OO)C[C@@H1](C)C(=O)O)[C@@H1]3C[C@H1]12	True	749.88	4.86	4	11	21	215.3	0.041	No	2	No	5.87
C1#CCC(CN2CCCC2)=C(C)OC1=O	True	205.26	1.31	0	3	2	29.54	0.387	No	0	Yes	3.84
C=12SC=C(C=1COC[C@H1]3CC[C@H1](C=4C=COC=4)OC3=O)C(C)C(=O)C=C2C5=CC6=CC=CC=C6N=N5	True	500.58	5.61	0	8	6	91.52	0.318	No	2	No	5.16
CN(CC1=CC=CC=C1)C(=O)CCC=C2C=C(Cl)S2	True	293.82	4.14	0	2	5	20.31	0.813	No	0	Yes	2.7
C12OC=C3C(N4C=CC=CC(OC)=C4)=CC(C)=C3OC[C@@H1]1O[C@H1]C[C@H1](O)[C@H1](O[C@@H1]5OC[C@@H1]C[C@@H1]6CCCC[C@@H1]6CN5C[C@@H1](O)[C@H1]OC(C)(C)OC)[C@@H1]2C	True	739.93	5.6	2	12	10	120.78	0.272	No	3	No	7.06
FC(F)(F)C(F)(F)C(F)(F)C(F)(F)C(F)(F)C(F)(F)C(F)(F)F	True	388.04	5.29	0	0	4	0	0.575	No	1	No	2.05
C1SCC1[C@@H1](NC(=O)C=2N=CN(C)C=2C)C3=CC=CC=C3	True	301.42	2.56	1	4	4	46.92	0.944	No	0	Yes	3.14
C1(C=NC(=O)C=C2C3=C)CC4=CC=C(F)C(Cl)=C4C(=O)OC3=C1O2	True	345.71	1.73	0	4	0	68.87	0.682	No	0	Yes	5.06
C1[C@@H1]2CN[C@@H1](CC2)[C@@]1(O)C(=O)C/C=C(\C)CC(=O)CCCC(C)C	True	335.49	3.18	2	4	9	66.4	0.635	No	0	Yes	5.04
C1N2N=CC=C2NC3=NC(OC)=CC=C31	True	202.22	1.39	1	5	1	51.97	0.648	No	0	Yes	3.23
C1C(O)CC[C@](C2)CC[C@]C[C@H1]3[C@@](C)(C[C@@H1]3OC)[C@@H1](O)[C@@H1](OC(=O)CC(C)C)[C@H1]1O2	True	423.57	3.12	2	6	4	85.22	0.676	No	0	Yes	6.56
C1CC(CCC)CC(CC)(C(C)=O)CC=C(I)C(C)(O)O1	True	408.32	4.62	1	3	4	46.53	0.691	No	0	Yes	4.84
COC(=O)OCC1=C(C)C(NCCC)=C2C(=C1O)C(=O)C=CC2=O	True	333.34	2.74	2	7	5	101.93	0.631	Yes	0	Yes	3
CC1CN(C2CCN(CC3=CC=CC(C#N)=C3)CC2=O)CC1	True	297.4	2.04	0	4	3	47.34	0.856	No	0	Yes	3.16
OCCNC(=O)[C@H1]([C@H1](CO)O[C@H1](CC1=CC=C(O)C=C1)NC=O)C[C@@H1](COCC2=CC=CC=C2)[C@@H1](OC(=O)CCCCCCCCCCCCCCC(=O)NC3=C(O)C=CC=C3OC[C@H1]O)[C@@H1]O	True	952.15	6.5	9	14	39	262.67	0.01	No	4	No	5.36
C1CC(=O)OCCO[C@]2CC[C@](C)(O)[C@@H1]12	True	213.25	1.03	1	4	0	55.76	0.611	No	0	Yes	4.54
C1C(O)CN[C@H1]C2C=C1C=C(CC(C)(C)O)C=C2OC(C)(C)P(=O)(O)OC	True	400.43	2.61	4	6	6	108.25	0.508	No	0	Yes	6.11
CCCCCCCC/C=C/[C@@H1]1O[C@H1](COS(=O)(=O)O)[C@@H1](O)[C@@H1](O)[C@@H1]1O	True	382.48	0.96	4	7	11	133.52	0.236	No	0	Yes	3.94
O1C=CC=C(OC2=CC=C(O)C=C2OC)C1=C[C@H1](O)[C@@H1](O)[C@@H1](O)C	True	336.34	1.19	4	7	6	108.61	0.618	No	0	Yes	4.23
O1C(=O)[C@@]2(C)[C@@H1]1OCC[C@H1][C@@H1]3CC=C4C[C@@H1](O)CC[C@]4(C)[C@H1]3CC[C@]2C	True	360.49	3.99	1	4	0	55.76	0.524	No	0	Yes	5.52
N1S(=O)(=O)C[C@@H1][C@@H1]1/C=C/C2=CC=C3C(=C2)CC(=O)N3	True	277.32	0.7	2	3	2	75.27	0.835	No	0	Yes	4.05
C1C(=CC[C@]2(C)CC3[C@@H1](O)[C@]12C4)[C@@H1]C(C)(C)C[C@]4(C)[C@@H1]3	True	272.43	4.33	1	1	0	20.23	0.696	No	0	Yes	7.2
COC(=O)[C@H1](C)OC(=O)C1=CON=C1	True	199.16	0.39	0	6	3	78.63	0.655	No	0	Yes	3.13
C1C=C2C=C(C(=O)NCC3=CC=C(I)C=C3)C=CC2=C1CCC	True	417.29	3.36	1	1	5	29.1	0.743	No	0	Yes	2.66
C=1CN=NN(C2=CC=C(F)C=C2F)C=1NCC(C)C	True	266.29	3.24	1	4	4	39.99	0.908	No	0	Yes	3.26
C12N(CC3=CC=CC=C3C4=CC=CC=C4)C5=CC=CC(C=CN1CCCC=C)C=C52	True	392.55	6.29	0	2	7	6.48	0.404	No	1	No	4.66
C1/C(=C\C2=CC=NC(N[C@H1]C3=CC=CC=N3)=C12)C(=O)NCCC4(CC4)C	True	347.44	3.34	2	4	7	66.91	0.806	No	0	Yes	3.36
C123C=CC(NS(=O)(=O)NCC(F)(F)F)C=CC=C4C1=C2OC4C3	True	346.33	1.45	2	3	4	67.43	0.757	No	0	Yes	7.03
C1C=C(C2=CC=CC=C2CC3=N[NH1]C=C3CO)CCC(=O)N1	True	297.36	1.79	3	3	4	78.01	0.805	No	0	Yes	3.17
CN(CC1=CC=CC=C1)C(=O)CCCC2=CC=C(O)C(O)=C2C=CC	True	339.44	4.11	2	3	7	60.77	0.746	Yes	0	Yes	2.43
CCNC(=O)C1CN(S(=O)(=O)C2=CC=C(C)C=C2)C13CCN(CC4=CC=CC=C4)CC3	True	441.6	2.79	1	4	6	69.72	0.748	No	0	Yes	3.43
N#C/COC1=CC=C(Br)C=C1	True	212.05	2.35	0	2	2	33.02	0.753	No	0	Yes	1.82
CCCC/C=C\CC/C=C\CCCCCCCCCC(=O)O	True	308.51	6.66	1	1	16	37.3	0.255	No	1	No	2.37
C1C(O)C2=NC3=C(CO[C@H1]3C1(C)CC)C(C#N)=C(N)OC2	True	289.34	0.99	2	6	1	100.86	0.749	No	0	Yes	5.79
C1N(CCC(=O)NC)C(=O)N(C)C2=CC=C(Cl)C=C12	True	281.74	1.85	1	2	3	52.65	0.919	No	0	Yes	2.42
CC(OC1CCOCC1)[C@H1](O)[C@H1](O)C(C)(C)O	True	248.32	0.06	3	5	5	79.15	0.641	No	0	Yes	3.91
CCNC(=O)[C@H1](CC1CCCCC1)NC[C@H1](O)C[C@H1](C2=CC=CC(C(N)=S)=C2)NC(C)=O	True	462.66	2.31	5	5	12	116.48	0.304	No	0	Yes	3.6
N12C(=O)C3=CC(C#N)=CC=C3N[C@@](C)(C1[C@@H1]2)NCOCC	True	285.33	1.27	2	5	4	77.16	0.495	No	0	Yes	4.33
C12N(CCC3=CC=CC=C31)CCS(=O)(=O)C2	True	237.32	1.01	0	3	0	37.38	0.676	No	0	Yes	2.87
CC(C)(C)OC(=O)C(OC(=O)C#CCC(F)F)F	True	266.21	1.83	0	4	3	52.6	0.444	No	0	Yes	3.94
O1C(CCC(C2=CC=CC=C2)(CC3[C@H1]1Cl)C(C)CO)CCC=CC(O[C@@H1]4O[C@H1](CO)[C@@H1](O5)[C@H1](O)[C@H1]4OCCC=C)(O[C@@H1]6O[C@H1](CO)[C@@H1](O)[C@H1](O)[C@H1]6NC(C)=O)C=C3CC[C@@H1](O)[C@H1]5[C@H1](O)C=C	True	952.53	1.75	9	16	14	255.55	0.073	No	3	No	7.08
C1CN2N=C(CCC(C)C)C=C21	True	164.25	2.03	0	2	3	17.82	0.668	No	0	Yes	2.79
C12C[C@@H1]3CC[C@@]4(C)C=CC(=O)[C@@H1]4[C@@H1]3C[C@H1](O)[C@@](C)(O)[C@@H1]1CC2=O	True	318.41	1.88	2	4	0	74.6	0.715	No	0	Yes	5.02
OCCNC(=O)[C@@H1](NC(=O)C1NC[C@H1](SC2=CC=C3C=CC=CC3=C2)[C@H1](O)[C@@H1](O)[C@@H1]1OC)C=O	True	491.57	-1.2	6	9	9	157.22	0.187	No	1	No	4.54
CCNC(=O)[C@H1](NC(=O)N[C@@H1](C)C(=O)NOC)C1=CC=CC=C1	True	322.37	0.23	4	4	7	108.56	0.539	No	0	Yes	3
[O-1][N+1]1=NN=NN1	True	87.04	-2.17	1	4	0	81.4	0.288	No	0	Yes	5.27
CCCCCCCCCCCCCBr	True	263.26	5.69	0	0	11	0	0.331	No	1	No	1.77
O1CC/N=C\C2=CC=CC=C2C(=O)N[C@@H1](CCCC3NC=C(C4=CC=CC(C5=CN=C(N)N=C56)=C4)N=N3)C=C6OC1=O	True	564.61	4.31	3	11	0	165.54	0.34	No	2	No	6.45
C/N=C1\SCC(=O)N1C=2SC(Cl)=C(C)C=2Cl	True	295.22	3.43	0	4	1	32.67	0.795	No	0	Yes	3.63
COC(=O)[C@@H1](NC(=O)[C@H1](C)NC)CCC	True	216.28	0.05	2	4	6	67.43	0.616	No	0	Yes	2.74
O1C(C2=CC=C(Cl)C=C2C(F)F)(CC3=CC=C(O)C=C3)O1	True	312.7	4.34	1	3	4	45.29	0.674	No	0	Yes	2.8
CN1CCC2=C1N=C(N)N2CC3=CC=CC=C3	True	228.3	1.51	1	4	2	47.08	0.847	No	0	Yes	2.44
O1C2=CC=CC=C2[C@@]1N=C([C@H1](CCC3=CC=CC=C3)[C@@H1](OC(C)=O)[C@@H1](OC(C)=O)[C@@H1]OOC(CC4=CC=CC=C4)C=C5SC(C6=CC=C(O)C=C6)=C(O)C5=O)C=O	True	789.86	7.22	2	13	18	167.25	0.026	No	3	No	5.21
C1NCCN1C=NC=C(C(=O)O)C=N	True	196.21	-0.5	3	4	4	88.78	0.321	No	0	Yes	4.52
CCCC/C=C/CCC(=O)CC	True	168.28	3.49	0	1	7	17.07	0.42	No	0	Yes	2.4
C1CNN=C(CSC2=CC=C3C=CC=CC3=N2)N=C(NCC4=CC=C(Cl)C=C4)N=CS1	True	469.04	4.8	2	8	5	74.03	0.526	No	0	Yes	3.81
C=1CNCCC=C(C=CC(=O)C(O)=CC(=O)O[C@@H1]C(C)(C)OCC)OC=1	True	364.42	2.48	2	7	8	94.09	0.388	No	0	Yes	4.76
ClC=CC=C1C=C2C[NH1]C(C3=CC=CC=C3Cl)=NC2C=C1CCC=C	True	371.31	5.57	1	2	5	24.39	0.673	No	1	No	4.35
C1C(O)CCC[C@]1(C)O	True	130.19	0.67	2	2	0	40.46	0.506	No	0	Yes	3.53
O1CO/N=C/CC2OC=NC3=CC=CC=C3[N+1]2=[N+1]1CCC(=O)C	True	318.33	2.09	0	6	3	75.5	0.8	No	0	Yes	5.44
CC=CC=C(OC=1C=C(C2=C3C=CC=C2)[NH1]C=1COC)C(=O)C=C(/C=C(/C#C[C@@H1](O)C(=O)CC4CCCC)OC(=O)CC=CC=C(OSC)C(OCCCl)C(=O)C=C5)C(O)=C4C5C(O)OC(OC)(OC)C(C)=C3	True	1044.61	8.75	4	16	13	218.6	0.037	No	3	No	6.81
CC(C)(C)C=NN(C(=O)C1=CC=C(F)C2=C1)CC=CC=C(NCCC3=C(C4=CC(O)=C3O[C@H1](C5=CC=C(OCCCN6CCCCC6)C=C5O)C(C)C)OC4([N+1](=O)[O-1])N2C=C)OC7=CC=C(C=C7)C[C@@H1]C=C	True	986.17	10.73	3	13	17	171.7	0.04	No	3	No	7.22
C1C(CO)O[C@@H1](CN2C=NC=N2)[C@@]1(O)C(=O)OC	True	257.25	-1.67	2	8	4	106.7	0.621	No	0	Yes	4.19
CCC(=O)NN=C(CC1=NN(C)C(=O)[NH1]C1=C)C	True	251.29	0.8	2	4	4	86.16	0.572	No	0	Yes	3.58
C1CC2[C@](C=O)[C@@H1]1CC[C@]2(C)C(=O)O	True	195.24	1.67	1	2	2	54.37	0.682	No	0	Yes	4.95
C1CC[C@@H1]1CCC(=O)NC2=CC=CC(F)=C2F	True	239.26	3.48	1	1	4	29.1	0.856	No	0	Yes	1.86
COC(=O)C(O)=C(CC1=CC=C2C=CC=CC2=C1)COC(C)=O	True	314.34	2.93	1	5	5	72.83	0.522	No	0	Yes	2.48
C=12[C@]C(=O)O[C@@H1](CCC3(F)F)[C@@]=1C[C@@H1]32	True	198.17	1.74	0	2	0	26.3	0.554	No	0	Yes	6.3
N1CC=C2C(=CC(OCCC3=CN=CC=C3O)C2=C1)OC(C)C	True	314.39	2.45	2	5	6	63.61	0.844	No	0	Yes	4.18
CCC(=O)O[C@@H1](C)CC/C(C)=C/CO	True	200.28	2.05	1	3	6	46.53	0.527	No	0	Yes	3.14
C1COC2=CC(OC(=O)C3=CC=CN=C3)=C(C)C(=O)C21	True	271.27	2.02	0	5	2	65.49	0.77	No	0	Yes	3.6
C1N(O)NC(=O)/C(C#N)=C(/O)COC(=O)C2=CC=CC=C2OC1(C)C	True	347.33	1.07	3	8	0	132.12	0.594	No	0	Yes	3.8
C#CCOC1=C(OC)C=CC=C1CC2[C@H1]C(=O)[C@]3(CC=CN3C)C[C@@][C@@H1]2OC	True	380.46	2.73	0	5	6	48	0.711	No	0	Yes	5.41
C=1C=CC=C(C(O)CNC(C)(O)C(O)C(C)C)C(C)(C)C(O)=C=1	True	323.43	1.78	5	5	6	92.95	0.379	No	0	Yes	5.17
C=1C=CC(OC)=C(C[N+1](=O)[O-1])C=C=1	True	179.17	1.44	0	3	3	52.37	0.374	No	0	Yes	4.57
C12OCC=C(C(=O)C=C(OC)[C@H1]3C[C@@]4(O)O[C@H1](O3)O[C@H1](CO)[C@@H1]4O[C@H1]1C)NC2=C(C)C	True	439.46	0.21	3	10	2	124.94	0.55	No	0	Yes	7.31
CC(O)C(=O)NCCOCCCN(CC1CC1)CC(C)C	True	300.44	1.26	2	4	12	61.8	0.533	No	0	Yes	2.92
C1CNC(=O)[C@H1]C[C@H1]C2C(=O)NCCC[C@@H1](NC(=O)OCC3=CC=CC(N)=C3)C(=O)N21	True	429.48	-0.1	4	6	3	142.86	0.494	No	0	Yes	4.43
C1OCCOCCN1C#CCNC=C(C2=NOC=C2OCO)[C@@H1](C)O	True	353.38	-0.42	3	9	6	109.45	0.357	No	0	Yes	4.64
COC=NC(=CC(=O)C=C[C@@H1]1C(C)=CC(=O)O[C@@H1]1C)NC	True	292.33	1.35	1	6	6	76.99	0.346	No	0	Yes	4.93
CCCCCCCC/C=C/C(=O)O[C@@H1]C=C(C)C	True	251.39	4.96	0	2	10	26.3	0.311	No	0	Yes	2.95
[O-1][C@@H1]1[C@@](O)([C@@H1]O)[C@@H1](O)[C@H1](O)[C@@H1]1O	True	178.14	-3.92	5	6	1	124.21	0.279	No	0	Yes	5.5
C1N(C)C=CC(C(C)(C)C=C2C3=CC=CC=C3N=N2)C(COCCOC4=CC=CC=C4)=C1	True	429.56	6.25	0	5	8	46.42	0.368	No	1	No	3.88
C12CCC1CCC(=O)/C(C)=C/C=CC=C(OC3=CC=C(OC(C)=O)C=C3C)C=C2	True	392.5	5.63	0	4	3	52.6	0.494	No	1	No	4.24
C1OC(=O)C=CC=C(/C=C/C=C\C(=O)N[C@@H1]2C(=O)N[C@@H1]2)C3OC(=O)[C@](C[C@H1]3O)O1	True	402.36	-0.9	3	8	4	140.26	0.238	No	0	Yes	6.21
C1CCCCCC/C=C\CCCCCCCOCCOCC2OC=CC=C(C(=O)/C=C/C3=CC=C(Br)C=C3)C(=C2OC)O[C@H1]1C	True	685.74	9.81	0	6	4	63.22	0.232	No	2	No	5.29
C1NCC(O)COC2=CC=CC=C2NC1=O	True	222.24	-0.03	3	4	0	70.59	0.576	No	0	Yes	3.46
C123C=CC(OC)=C(OC)C(O4)=C(O)C(O)=CC(=C4)C1=C2C3=O	True	300.27	2.07	2	6	2	85.22	0.812	No	0	Yes	6.22
N1C(C2=CC=C(Cl)C([N+1](=O)[O-1])=C2)=NC1	True	211.61	1.56	1	4	2	67.53	0.596	No	0	Yes	2.57
CC1C=C2C(=C(O)C(C(=O)C3=CC=CC=C3)=C2O1)[C@](C)C(=O)C=C4CCC[C@]5(C6)OC([C@H1]7CC8[C@H1]C[C@@]78C6)[C@@]4(C)CC[C@H1]5[C@@H1](O)C[C@H1]	True	634.81	7.59	2	6	7	93.06	0.237	No	2	No	7.4
C=1=C(C=CC=CC=C(C(F)(F)F)N=C)C[NH1]C=1C(=O)O	True	284.24	2.34	2	3	5	61.69	0.463	No	0	Yes	4.74
OC/C=C/C1=CC=C([C@@H1]2COC[C@H1]2OCC[N+1](C)(C)CO)OC1	True	326.41	0.43	2	5	8	68.15	0.5	No	0	Yes	4.86
CN(C)CCCCNC(=O)C=CC(C)(C)C	True	226.36	2.05	1	2	6	32.34	0.555	No	0	Yes	2.42
CCCCCCCO[C@H1]O[C@H1](CO)[C@@H1]O[C@H1][C@H1]OC[C@](O)C1[C@@H1](O[C@@H1]O[C@H1](CO)[C@@H1](O[C@@H1]O[C@H1](CO)[C@@H1](O)[C@H1](O[C@@H1]2OC[C@@H1](O)[C@H1](O)[C@H1](O)[C@H1]2OS(=O)=O)O[C@H1]OCCC/C=C\C)C[Si](CO)C(O)CO)C1OC(O)C	True	1142.28	-2.51	13	28	49	406.12	0.01	No	3	No	5.67
C1[C@@H1]C=NN1C2=CC3=C(C=C2[C@H1](C)C)CCOCC3	True	257.36	2.94	0	3	2	24.83	0.813	No	0	Yes	3.44
CC=CC1C(CC(C)[C@@](O2)[C@@H1](OC(=O)/C=C(\C)CCCC)C=3C=COC=3[C@]2)CC[C@]1C	True	424.58	7.17	0	4	9	48.67	0.239	No	1	No	5.46
CCN(CC1CC1CCCCCCCCC)OCO	True	271.44	3.97	1	3	13	32.7	0.312	No	0	Yes	3.7
O1/N=C2/CCCCC3=C2C=CC=C13	True	173.22	2.51	0	2	0	21.59	0.59	No	0	Yes	3.82
C1N(C)CC2=CC=C(Br)C=C2N=C1	True	239.12	2.6	0	2	0	15.6	0.679	No	0	Yes	2.97
CN1CC(F)C[C@H1]1C=2N=NN(CC(F)F)C=2	True	234.22	1.26	0	4	3	33.95	0.789	No	0	Yes	4.1
C1C(NC(=O)C[C@@H1](C(=O)O)[C@H1]2CC[C@H1]([C@@H1]2CC(=O)OC)C[C@H1]1)C3=CC=CC=C3	True	386.47	3.14	2	4	4	92.7	0.776	No	0	Yes	5.34
O1C(C#CC2=CC=C(Cl)C([N+1](=O)[O-1])=C2)[C@@H1]1CC3=CC=CO3	True	303.7	3.2	0	4	3	68.81	0.378	No	0	Yes	3.61
C1CC[C@@H1]1CC2=CC=C(O)C(O)=C2	True	178.23	2.44	2	2	2	40.46	0.683	Yes	0	Yes	1.94
N1S(=O)(=O)C=CC(C(=O)NCCC(F)(F)COC2=C(Cl)C=CC=C2Cl)=CC1=C	True	453.29	3.4	2	4	7	84.5	0.663	No	0	Yes	3.54
C123CCN1C4=CC=C(NC(=O)NC5=CC=C(F)C=C5)C=C2CC[C@@H1]34	True	323.37	3.52	2	2	2	44.37	0.874	No	0	Yes	5.33
C1CN(C2[C@H1]3CC[C@H1](C34)C2C(=O)C5=CC=CC=C5C4=O)CC1=O	True	309.37	1.98	0	4	1	54.45	0.796	No	0	Yes	5.15
O1/N=C(\N)C=CC=CCCCCCNC(=O)[C@H1]CC2[C@H1][C@H1]3[C@H1](O)CCC[C@H1]3OC[C@@H1](O)[C@@H1]2OC=C1	True	489.61	2.27	4	8	0	135.63	0.41	No	0	Yes	5.99
C1CC(=O)O[C@@H1][C@H1]2C[C@]2(C3)CC[C@]=4C5=C(C)C=C(O)C(=C53)C1=4	True	295.36	3.77	1	3	0	46.53	0.741	No	0	Yes	6.68
CC/N=C(\N)NCCC=1[NH1]C=NC=1C	True	195.27	0.18	3	2	4	79.09	0.474	No	0	Yes	3.18
C1[C@@H1]CC2=CC=C1C=C2[C@@H1](O)[C@@H1]3OCC[C@H1]3O[C@H1](C)CCC=CC=C(O)C(O)=C	True	399.51	4.44	3	5	9	79.15	0.423	No	0	Yes	5.86
CC(CCC(=O)OC)CN(C)C(=O)[C@@H1](NC(=O)OCC1=CC=CC=C1)C(C)C	True	392.5	2.99	1	5	10	84.94	0.619	No	0	Yes	2.98
C1C=C(C2=C3SC=NC3=CCC2)O1	True	191.25	0.78	0	3	1	22.12	0.654	No	0	Yes	4.08
CC1CN(C(C)(C)C2=NC3=CC=CC=C3N=C2C=O)CC1	True	283.38	3.02	0	4	3	46.09	0.812	No	0	Yes	3.22
C=12NCC3=CC=CC=C3[C@]=1C[C@H1]2C4=CC=CC=N4	True	234.3	3.08	1	2	1	24.92	0.82	No	0	Yes	3.24
O1[C@]C2=CC=CC=C2[C@@]1[C@](F)C(=O)NCCC3=CC=CC=C3	True	295.31	2.84	1	2	5	38.33	0.921	No	0	Yes	3.22
C1C(=O)O[C@@H1]2C[C@H1][C@](C)(C)OC(=O)[C@]12C[C@H1](O)C[C@H1](OC(=O)C=CN(C3CC3)C(=O)O)C[C@H1]O	True	481.5	1.85	3	9	10	159.9	0.239	No	0	Yes	5.49
NS(=O)(=O)CCN(CC1=CSC=N1)CC2CCCCC2	True	317.48	1.81	1	5	7	76.29	0.832	No	0	Yes	2.7
C1CC[C@@H1](C[C@@H1](C)C(=O)N[C@@H1](CC)C2=CC=C(OC3=CC=C(NC(=N)C4CC4)C=C3)C=C2C(=O)OC)CC=C1C	True	545.72	7.79	3	5	11	100.51	0.116	No	2	No	4.04
C12CC(N)C(=O)O[C@H1]C[C@H1][C@](CC3C(C)OC1C)O[C@@H1]O[C@@](CCC)[C@@H1]N(C)CC[C@@H1]2[C@@]3OOC	True	493.62	3.69	1	9	4	101.71	0.357	No	0	Yes	7.6
C12NC(=O)C=NSC1(N/N=C/C3=CC=C(C=C3OCO)CCCC)CC2=O	True	390.47	1.17	3	8	8	112.38	0.266	No	0	Yes	4.57
C=12SC=CC=1NC(=O)NCC3=CC=CC=C3[C@]2CN4CCCCC4C	True	354.5	4.23	2	3	2	44.37	0.848	No	0	Yes	3.84
C1CNS1(=O)C2=CC=CN=C2	True	170.24	-0.02	2	2	1	41.99	0.581	No	0	Yes	4.55
COC(=O)[C@@H1]1CCCN1C(=O)C2=CC=C(C)C=C2	True	247.29	1.77	0	3	2	46.61	0.748	No	0	Yes	2.15
O/N=C(\C=NC1=C2C=CC=CC2=CC=C1C)ON/N=C/C3=CC=CC=C3	True	346.39	4.19	2	6	5	78.57	0.315	No	0	Yes	3.05
CC(=O)NCC(=O)N/N=C/C1=CC=CC=C1N(C)S(C)(=O)=O	True	326.38	-0.33	2	5	6	107.94	0.551	No	0	Yes	2.43
O1[C@]2C(=C[C@H1](O)C[C@@]2(O)C1=O)[C@@H1]C(=O)NCCNCCNCCNCC3=CC=CC=C3N(C)S(=O)(=O)C4=CC=C5C=CC=CC5=C4	True	649.77	0.77	6	10	16	169.33	0.096	No	2	No	4.3
C1C(O)COC2=CC(C3=CC=C(O)C=C3Cl)=C4C(=C2O1)OC(C)(C)CC4	True	376.84	3.95	2	5	1	68.15	0.788	No	0	Yes	3.51
C1OC(=O)C[C@H1](OC(C)=O)[C@](O)/C(C)=C/[C@@]2O[C@H1]21	True	254.24	0.65	1	6	1	85.36	0.546	No	0	Yes	4.88
C12OCCOC3=CC(O)=CC(OCC4=CC=C(O)C=C4)=C(O)C3=C(O1)C=C2OC	True	400.38	3.21	3	8	4	106.84	0.707	No	0	Yes	5.15
O1/N=C/C2CN(C3[C@@]C[C@H1]4[C@@H1](C3)[C@@H1][C@H1](O)[C@H1](C5=CC=C(O)C=C5)NC4CC6=CC=CC=C6)[C@@]2(C)CC[C@@H1]1OC(=O)NCCC	True	601.77	4.64	4	8	7	115.65	0.366	No	1	No	5.71
COC(=O)NC1=C2C=CC(Cl)=C1C(C(C)C)C2	True	253.73	3.81	1	2	2	38.33	0.87	No	0	Yes	3.86
OC(=O)[C@@H1](O)[C@@H1](O)[C@H1](O)/C=C/C1=CCOC1=O	True	244.2	-1.81	4	6	5	124.29	0.42	No	0	Yes	4.3
C1N(S(C)(=O)=O)CC1	True	135.19	-0.35	0	2	1	37.38	0.493	No	0	Yes	1.85
OC(CCCCCC(CCCCCCCCCC)OOC)(N)CCCCCCCCCCCCCCCC/C=C\CCCCCCCCCC	True	708.25	15.39	2	4	43	64.71	0.022	No	2	No	3.75
N#C/C=C\CO	True	83.09	0.06	1	2	1	44.02	0.455	No	0	Yes	3.48
O1[C@]C2=CC=C(O)C(Cl)=C2CN[C@H1]1[C@@][C@@H1]O	True	238.65	1.49	3	4	2	61.72	0.731	No	0	Yes	5.25
O1C2=CC=CC3=C2C1[C@@](O)OC3	True	163.15	1.51	1	3	0	38.69	0.63	No	0	Yes	3.71
CC(OC1=CC=C(N(C)C2CC)OC1)C(OC(C)=O)C(OC(C)=O)CO2	True	369.41	1.71	0	8	3	83.53	0.695	No	0	Yes	5.88
O1[C@H1]C2C[C@H1]3[C@@H1]CCC4=CC(=O)CC[C@]4(C)[C@@]3(F)[C@@H1]2O[C@@H1]1CO	True	322.38	2.52	1	4	1	55.76	0.806	No	0	Yes	5.42
C=1=C(OC2=C(OC)C=CC=C2[C@@]=1)C(=O)NC3=CC=CC=C3	True	278.29	2.92	1	3	3	47.56	0.878	No	0	Yes	3.17
N12CC[C@H1]C(=O)O[C@@H1]([C@@H1](C)CCCC(C)(O)CCCCCCCCCCCCCCC)C(=O)[C@H1](C)[C@]1(C)[C@@H1]2O	True	550.85	7.14	2	6	19	86.84	0.101	No	2	No	5.38
O1C(C2=CC=CN=C2C(F)(F)F)[C@H1]1C3=CC=C(OC(F)(F)F)C=C3	True	349.23	4.81	0	3	3	34.65	0.589	No	0	Yes	3.3
C1C=CC=CC(NC(=O)[C@H1](CC)CC2=CC=C(OC)C=C2[C@H1](OC)CNC1)=C(C(C)C)C3=COCO3	True	496.65	4.93	2	6	5	78.05	0.602	No	0	Yes	4.83
COC(=O)CCC(C)C	True	130.19	1.6	0	2	3	26.3	0.542	No	0	Yes	1.74
C1CCCCCC[C@H1](O)[C@H1]CC[C@H1][C@@H1](O)CCCC2=C[C@H1](O)C/C(=C\CC3=CC=NO3)[C@H1]2OCC1	True	487.68	5.43	3	6	2	95.95	0.481	No	1	No	5.43
O1/N=C(\CCl)C2=CC=C(NC(=O)C(C)C)C1=C2	True	252.7	2.62	1	3	3	50.69	0.841	No	0	Yes	3.65
CC1NC(C2=CC=CC=C2)(C3CCCCC3)C1	True	229.37	3.84	1	1	2	12.03	0.812	No	0	Yes	3.18
C1OC=C(C)C=C(CCN(C)[C@](O)C(=O)[C@H1](C)O)C(=O)[NH1]C1=N	True	324.36	0.07	4	7	6	122.95	0.548	No	0	Yes	4.92
C1CC=NN=C([C@H1]2CCC[C@H1](N(C=S)CCC=O)C)N=CN=C2N1CCCCCCC(=O)NCCC	True	517.74	4.02	1	8	18	102.09	0.168	No	1	No	5.81
C1C(=O)NCCO[C@@H1][C@H1](OC2=C(C=C(O)C(O)=C2OC)[C@](O)=C(C)[C@@H1](O)C[C@](O)C3=CC(=O)O[C@H1]C)[C@H1]3[C@@H1]1	True	533.53	1.98	6	11	3	184.24	0.19	Yes	3	No	5.9
C12N(C)C(=O)C=C3C=C(C=CC4=CC=NC=C14)N=C23	True	249.27	1.89	0	3	0	45.56	0.704	No	0	Yes	4.89
O1C[C@H1]CC=CC[C@@H1]1O[C@@H1]2O[C@H1](CO)[C@@H1](O[C@@H1]3O[C@H1](CO)[C@@H1](O)[C@H1](O)[C@H1]3O)[C@H1](O)[C@H1]2O[C@@H1]OC[C@@H1](N[C@@H1](C)C)[C@H1](O)[C@H1]	True	607.65	-2.88	8	15	14	218.25	0.073	No	3	No	6.04
COC1CCC(CC)(OC)CC[C@@H1]2[C@@H1](CO)[C@H1](O)C[C@@H1]2[C@H1]1/C=C/C=C3/[C@@H1](C)OCO3	True	424.58	3.43	2	6	6	77.38	0.68	No	0	Yes	5.79
C1OC(=O)CC2=C1C(NC3=CC=C(NC(=N)N)C=C3)=CC=C2C4=CC=CC=C4C5CC5O	True	428.49	3.85	5	5	5	120.46	0.239	No	0	Yes	3.55
CC(C(=O)OC1CC(C)C)CC[C@H1][C@H1]C[C@]2(C)C(=C3C[C@@H1][C@@]4(C)C[C@@H1](O)[C@H1](O[C@@H1]5O[C@H1](CO)[C@@H1](O)[C@H1](O)[C@H1]5O)C[C@]4C)[C@@H1]3CC[C@]12C	True	660.89	4.44	5	9	8	145.91	0.188	No	1	No	6.64
C1NC(=O)C=CN(C2=CC=CC(=C2)N=C1C)SC=CC([C@@H1]3C=CC)=CC(=C3OC/C=C)\CCCC(=O)N[C@H1](CC=C(C)C)C(=O)NCCCC[C@@H1](OC)CC(=O)N(C)CCNC(=O)[C@H1](CC4=CC=CC=C4)NC=O	True	1033.35	7.61	5	11	31	199.87	0.022	No	3	No	7.11
O1[C@H1]2CCC3[C@@H1][C@@H1]C=CC(=C4C[C@H1][C@H1](O)[C@H1]14)[C@@H1]32	True	229.3	2.02	1	2	0	29.46	0.688	No	0	Yes	5.57
CCNC(=O)C/C=C/[C@@H1][C@H1](C[C@H1](C)[C@@H1](O)[C@@](C1)CC1C)C=O	True	307.43	2.48	2	3	10	66.4	0.609	No	0	Yes	4.77
N12C3=CC=C(C(=O)NCCOCC4=CC=CC(O)=C4)C=C5C3=CC1=C2N(C)C(=O)C6=CC(OC)=C(OC)C(OC)=C6C5	True	569.61	1.91	2	8	9	111.49	0.379	No	1	No	5.27
C1CN/C=C/[C@H1]C(OC2)=CC(=O)C[C@H1](O)C[C@]2(C)C1=O	True	278.33	0.9	2	5	0	75.63	0.688	No	0	Yes	5.94
O1C2=C(C(C)(O)O)C=C(C)C(O)=C21	True	182.17	0.96	3	4	1	73.22	0.453	No	0	Yes	3.32
C=1SC=CC=1C(=O)OCC2=CC=CC=C2	True	218.28	3.11	0	3	3	26.3	0.74	No	0	Yes	1.71
C12COC=CC=C(C[N+1]3=CC=C(C(=O)OC)C=C34)N1N=CC=C2[NH1]C=C4C=COC	True	407.45	1.85	1	7	3	76.27	0.468	No	0	Yes	6.28
N12C(=O)C(O)=C(/C=C/[C@@H1](C)CCCC3CCCCO3)[C@@H1]1CCC4=CC=C5[NH1]C6=CC(C=O)=CC=C6C5=C4O2	True	514.62	6.33	2	5	7	91.86	0.36	No	2	No	4.5
CCCCC(=O)O[C@H1]CC[C@](C)C(=C1C2[C@@H1][C@@](C)C/C(=C\C3=CC=C(F)C=C3)C(C)(C)[C@@H1]2)CC[C@]1C	True	490.7	9.21	0	2	10	26.3	0.186	No	1	No	4.63
C12C=C(/C=C/[C@@H1]1OC=C)[C@@H1]2OC(=O)/C=C/C3=CC=CC=C3	True	280.32	3.27	0	3	5	35.53	0.472	No	0	Yes	4.79
C1C2=CC(F)=CC=C2N(CC3=CC=CC=C3)C1=O	True	241.26	2.92	0	1	2	20.31	0.791	No	0	Yes	1.8
CN(C)C(=O)C=CC=C(N/C(=N/OC)C1=CSC(=O)NC1)OC=C	True	352.42	1.52	2	6	7	92.26	0.18	No	0	Yes	4.37
O1/N=C(\CN2CCCC2)C3=NC=C(S(=O)(=O)O)C=C13	True	283.31	1.07	1	6	3	96.53	0.841	No	0	Yes	2.7
C1NC(=O)/C(=C/CCCC2=CC[C@H1](O)CC2=O)OO1	True	267.28	0.73	2	5	4	84.86	0.445	No	0	Yes	4.51
O1/N=C/C2=CC=CC=C2N=C1C3=CC=C(C(F)(F)F)C=C3	True	290.24	4.15	0	3	1	33.95	0.777	No	0	Yes	2.85
N#C/C(=C\C=C\CCC/C1=C\C2OC(C)(C)C=C2Br)C\CCCCCCC(=O)O1	True	462.43	6.79	0	4	1	59.32	0.403	No	1	No	4.68
C1CCC[C@H1](O)[C@@H1](O)COC1	True	160.21	0.3	2	3	0	49.69	0.536	No	0	Yes	3.48
CN(CCCCNC(=O)/C=C/C1=CC=C(O)C(OC)=C1)C(=O)[C@](O)(C(=O)OC)C(=O)O	True	438.43	-0.24	4	8	11	162.7	0.158	No	0	Yes	3.28
C=12OC=1C=CC=C2OC3O[C@H1](CO)[C@H1](O)[C@H1]3OC=C	True	266.25	0.78	2	6	5	80.68	0.615	No	0	Yes	4.03
C1NN=CC(=C1N2CCC(O)(CC(C)C)C(C)C)CC2	True	279.43	2.36	2	4	6	47.86	0.784	No	0	Yes	4.45
CC=1C2=NNC=1N(CC(=O)NCC3=CC=C(Br)C=C3)C2=O	True	349.19	1.76	2	3	4	78.09	0.883	No	0	Yes	3.24
FC=CC(Br)=C(OCCN(C[C@H1](O)CN)[C@@H1](O)C=N)OC	True	370.22	0.29	4	7	11	112.03	0.18	No	0	Yes	4.97
C12CCC1CCC(=O)N[C@H1]3CC[C@](CC3)O[C@@H1]4O[C@@]5(C)CC[C@H1]6[C@H1](C)CC[C@@H1]2[C@@]46OO5	True	432.58	4.63	1	5	0	66.02	0.566	No	0	Yes	7.03
C12N(C)C=CC(=C1O[C@]23COC(=O)O3)O[C@H1]4O[C@H1](CO)[C@@H1](O)[C@H1](O)[C@H1]4O	True	373.31	-2.26	4	11	3	147.38	0.397	No	1	No	5.65
FC(F)(F)C(F)(F)C1OC(CO)C(N2)CC(O)C(O)C1OC(=O)/C=C(\OCC)/C=C/C(=O)N[C@H1]COC(=O)[C@H1](C)[C@@H1](O)CC(=O)O2	True	677.55	-0.92	6	14	4	219.41	0.121	No	3	No	6.86
C1(=O)NC=CC=C1C(=O)N[C@@H1](C)C(=O)N[C@@H1](CCCNC(N)=O)C(N)=O	True	366.38	-2.09	6	5	9	189.27	0.273	No	1	No	3.11
C1CC(CCCC2=CC3=CC=C2)O[C@@H1]O[C@@](C)CC[C@H1]1[C@@]3O	True	301.41	4.54	1	3	0	38.69	0.764	No	0	Yes	5.79
CCCCCCCCC[C@@H1]C1[C@@H1](CO)NC[C@H1]1O	True	256.41	2.27	3	3	10	52.49	0.526	No	0	Yes	3.95
C123C=CCC(=O)C=CC4=C(CCC(O)=C4C=C5CCCCC5)[NH1]C1=C2C3	True	347.46	5.07	2	3	1	49.33	0.651	No	1	No	5.33
CN(CC1=CC=CC=C1)[C@H1]2CCC[C@H1]2C=CC3=C(C(Cl)CCl)OC(C[C@@H1](O)[C@@H1](O)[C@H1](CC4=CC=CC5=C4)NC(=O)O[C@H1]6CO[C@@H1](CC7=C(Cl)C=C(Cl)C=C7Cl)N6CC(=O)NCCNCC8=CC=C([N+1](=O)[O-1])C=C8)C5=C3C	True	1141.42	9.58	5	12	19	188	0.026	No	3	No	7.34
CCNC(=O)[C@H1](C(C)C)N(C)C(=O)[C@@H1](NC(=O)[C@H1](CC(C)C)NC(=O)[C@H1](CCCNC(=N)N)NC(=O)[C@H1](C)NC(=O)[C@@H1]1CCCN1C(=O)[C@H1](N)CCCCNC=O)NCC(=O)N[C@H1](CCCN)C(=O)N[C@@H1]([C@@H1](C)O)C=O	True	1081.33	-5.06	15	16	37	436.69	0.009	No	3	No	5.91
O1C[C@H1](O)[C@@](O)[C@H1]2C[C@]1(O)O[C@H1]2	True	174.15	-0.87	3	5	0	79.15	0.444	No	0	Yes	6.25
OC(C1=CC=C(F)C(F)=C1CCC(=O)O)C(=O)O[C@H1]CC[C@H1][C@@H1]CC=CC[C@@H1]O[C@@H1]2O[C@H1](CO)[C@@H1](O)[C@H1](O[C@@H1]3O[C@@H1](C)[C@H1](O)[C@@H1](O)[C@H1]3O[C@H1]2)O[C@@H1]O[C@@H1](C)[C@H1](OC(=O)CCCCC)[C@@H1](O)[C@H1]	True	944.97	2.96	7	18	28	275.89	0.036	No	3	No	7.36
C1CC2=CC(C=C3CC(C)(C)O[C@H1]3C4=CC=C(O)C=C4)=CC=C21	True	306.41	4.81	1	2	2	29.46	0.862	No	0	Yes	3.23
C12CCCC=CCC(=O)C(CC1CC)C3=CN(N=N3)[C@@H1]2C(=O)OCCC4=CC=CC=C4	True	421.54	4.43	0	6	5	74.08	0.527	No	0	Yes	5.64
C1C(=O)NCCC(=O)NCSC2=C(C(=O)CC(C)(C)[C@H1]2O)[C@]1(CCCCNC(=O)C3=CC=C(N4C=NN=N4)C=C3)CCCC=O	True	639.78	2.25	4	11	11	185.27	0.21	No	2	No	4.92
O1C2=CC=C(C=C2C)[N+1](=N1)[C@@](C)CC[C@H1](C=CC(=O)[C@])C3[C@@](C)[C@@H1](O)CC[C@@]3C	True	393.51	5.02	1	4	7	61.9	0.523	No	1	No	6.29
CCCC/C=C\CCC[C@H1](C)CCC[C@@H1](C)O	True	240.43	5.09	1	1	11	20.23	0.394	No	1	No	3.13
O1/N=C(/CN2C=NC=N2)C=C3C=C(Br)C1=C3	True	279.1	1.77	0	5	2	52.3	0.829	No	0	Yes	4.87
O1/N=C(\N)C=C(F)C(F)=C(F)C(F)=C1O	True	224.11	1.64	2	4	0	72.28	0.657	No	0	Yes	3.45
C1C(O)C=2OC3=CC=CC=C3[N+1]=2C[C@@H1]1C	True	204.25	1.79	1	2	0	37.25	0.664	No	0	Yes	4.19
CC(O)C(O1)CCC(O)C1CC2C(C)=C[C@@H1](O)[C@H1]2CO	True	286.37	0.21	4	5	4	90.15	0.555	No	0	Yes	4.93
CC1C(=O)N(CC2=CC=CC(OC(F)(F)F)=C2)C[C@H1]1C3=CC=C(I)C=C3	True	475.25	4.95	0	2	4	29.54	0.586	No	0	Yes	3.24
CC(O)CC(=O)/C=C/C1=CC=CC=C1	True	190.24	2.04	1	2	4	37.3	0.738	No	0	Yes	2.52
C1=C(N2CC2)N(C(=O)C3=CC=CC=C3)C=CC4=CC=C1C=C4CCN	True	331.42	3.21	1	4	4	51.03	0.747	No	0	Yes	3.97
C12OC(=O)CC=CC=C(NS(=O)(=O)C[C@H1](C)CCCN)C1=C2	True	326.42	0.98	2	5	7	98.49	0.68	No	0	Yes	4.82
O1CCNC(=O)[C@H1]CC=CC2=C1P2N	True	211.18	0.82	2	3	0	64.35	0.583	No	0	Yes	5.6
C1C(OC(=O)NC2=NC=CC=C2O[C@@H1])(O)C[C@@](C)C[C@@H1](O)C[C@H1](C)O1	True	351.38	1.91	3	7	3	110.14	0.714	No	0	Yes	5.08
OCCNC(=O)C(CC#CCNC(=O)[C@@H1](CC(=O)O)NCC)=O	True	327.34	-2.37	5	6	10	144.83	0.223	No	0	Yes	3.42
N1C[C@H1]C(=O)CN2[C@H1]O[C@](C)CC3[C@H1][C@H1](C)C(=O)O[C@@]23C[C@@H1]1CC=C	True	346.43	1.8	1	6	2	67.87	0.607	No	0	Yes	6.69
CCCC=CC=C(C(=O)/C(CC)=C\C(C)CCC)CCCCCCCC	True	360.63	8.36	0	1	16	17.07	0.153	No	1	No	3.58
C1CON(CC(N)=O)CCC1	True	158.2	-0.11	1	3	2	55.56	0.61	No	0	Yes	2.75
C1C2OC3[C@@H1](O)CC[C@@H1][C@@]4(C5)CC[C@H1](CC(C)C)OC4=CC6[C@@H1](CC[C@H1]O[C@H1]7O[C@@H1](C)[C@H1](OS(=O)(=O)O)[C@H1](O)[C@H1](O)[C@H1]7OCC)CC[C@@H1]6CC[C@]52C[C@H1]1[C@H1]3OCO	True	829.06	4.78	5	13	13	199.9	0.097	No	2	No	7.92
O1/N=C(\N)C=CC=C(CCCC23CC4CC(CC(C4)C2)C3)C=C1C(=O)C(=O)NC[C@H1](O)CN	True	456.59	2.54	4	7	9	144.47	0.33	No	0	Yes	5.02
O1C(=O)NC=CC=CC2=CC=C(/N=N\C3=CC=CC=C3)C(OCC4=CC=CC=C4)=C2O1	True	413.43	6.24	1	6	5	81.51	0.396	Yes	1	No	3.61
C1CCCCCCO[C@@H1]2O[C@H1](O)[C@@H1](O)[C@H1](O)[C@@H1]2O[C@@H1]1CO	True	306.36	-0.5	4	7	1	108.61	0.517	No	0	Yes	4.43
CCC(=O)N[C@@H1](CCC(N)=O)C(=O)N[C@@H1](CO)C(N)=O	True	288.3	-2.89	5	5	9	164.61	0.307	No	0	Yes	2.9
C1CC(=O)C2=CC=CC=C2C1=O	True	160.17	1.85	0	2	0	34.14	0.58	Yes	0	Yes	1.94
C1N(C)CC1	True	71.12	0.32	0	1	0	3.24	0.397	No	0	Yes	1.45
C1[C@@H1]C2C3NC=C(C([C@H1](C(C)C)NC(=O)[C@H1](C(C)C)N(C)C(=O)CCN)=NC3=C(Cl)N2C[C@@H1](O)C[C@H1]NC(=O)OC(C)(C)C)C(=O)N1	True	679.26	1.12	6	10	13	190.72	0.155	No	2	No	6.74
C1CCN(CCC(C)(C)C2=CC=CC=C2)CC1	True	231.38	3.84	0	1	4	3.24	0.761	No	0	Yes	1.88
C1CN(CC2OC(C3=CC=C(Cl)C=C3)C1C2)C(=O)OC	True	295.77	3.26	0	3	1	38.77	0.798	No	0	Yes	4.18
CC1C23C=C4C=C(OCC(=O)OCC)C=C4N(CC1C2)CC3	True	301.39	2.64	0	4	4	38.77	0.748	No	0	Yes	5.85
C1N[C@@H1](OCC2=CC=CC=C2C)C[C@@H1]1OC	True	221.3	1.85	1	3	4	30.49	0.841	No	0	Yes	3.31
C1CC(=O)CC[C@]2(C)O[C@H1]2C3CC(C)=CC(=O)C31O	True	264.32	1.55	1	4	0	66.9	0.674	No	0	Yes	4.97
C1C2=CC(O)=CC=C2O[C@H1]1C3=CC(O)=C(O)C(O)=C3	True	260.24	2.19	4	5	1	90.15	0.59	Yes	0	Yes	2.93
C1[C@@H1]C/C(=C\C2=CC=C(NC(=O)CC(F)(F)F)C=C2)[C@@H1](O)[C@H1](O)[C@H1](O)/C=C/1	True	384.37	2.6	4	4	3	89.79	0.603	No	0	Yes	4.52
CN(CCSCC1=CC=C2C=C1)C(=O)CO[C@H1](CC3=CC=C(O)C=C3)COC(=O)/C=C/C=C/CO[C@H1](C(=O)O)C2O	True	585.68	2.88	3	9	3	142.83	0.364	No	1	No	5.55
C=1CC(=O)N(C)[C@@H1]CC[C@@](C)(C(=O)O)[C@H1](C)C[C@]=1C	True	266.36	2.85	1	2	1	57.61	0.742	No	0	Yes	4.66
OC(N[C@@H1](CF)C(O)C#CCOCCOCCO)C(P(=O)(O)O)C[C@H1]O	True	402.33	-1.91	7	8	14	168.94	0.075	No	1	No	5.12
CCSC(NNC(C)=O)(O)OC(=O)OCC	True	252.29	0.16	3	7	6	96.89	0.352	No	0	Yes	3.83
C1CO/N=CC(CNC(=O)OC(CO)C1)O	True	232.24	-0.77	3	6	1	100.38	0.551	No	0	Yes	4.74
COC1=C(CCCCCCC)/C(=C/C2=CC=C(O)C=C2)O1	True	288.39	4.98	1	3	8	38.69	0.685	No	0	Yes	2.74
C1C(O)C[C@H1]2[C@@H1]3CC=C4C[C@@H1](O)C=C[C@]4(C)[C@H1]3CC[C@@]21C	True	288.43	3.45	2	2	0	40.46	0.67	No	0	Yes	4.64
CC(Cl)Cl	True	98.96	1.81	0	0	0	0	0.406	No	0	Yes	2.73
C12=C(C(=O)NC3=CC=C(C(=N)N)C=C3)N1CC4=CC=NC5=CC=C6C(=C45)[C@@H1]2OCCCC6	True	425.49	3.59	3	5	3	104.1	0.439	No	0	Yes	3.51
CN1CCN(C)CC1	True	114.19	-0.14	0	2	0	6.48	0.432	No	0	Yes	1.75
C=C(C=CC(=O)CO)CC1CC[C@H1](O)CC1=O	True	238.28	0.78	2	4	5	74.6	0.548	No	0	Yes	4.06
C=1C(O)CC[C@H1]C(C)(C)[C@H1](O)CC[C@@](C2[C@H1]O[C@@H1]2CC[C@]=1)=C(C)C	True	333.49	4.17	2	3	0	49.69	0.654	No	0	Yes	6.11
CCNC(=O)/C(=C/C1=CC2=C(C=C(O)C=C2C=O)C)C1NC(=O)OC(C)(C)C	True	386.45	2.87	3	5	5	104.73	0.675	No	0	Yes	3.71
C1=2OC=CC1(C=CSC(NC(=O)OCC3=CC=CC=C3Br)=N)C=2	True	393.26	4.28	2	5	4	71.41	0.592	No	0	Yes	4.36
C1CC(C2CCC)C3[C@H1][C@H1](OC(=O)C4=CC=CC=C4)[C@]1O[C@H1]3[C@H1]2O[C@H1]OC(=O)C5=CC=C(Cl)C=C5O	True	511.98	5.52	1	7	8	91.29	0.466	No	2	No	5.94
C1C=2OC=CC=2[C@@H1]C3C[C@@H1]13	True	133.17	2.02	0	1	0	13.14	0.527	No	0	Yes	4.74
O1/N=C(\CC=2C=NOC=2)C3=CC=CC=C31	True	200.2	2.41	0	4	2	52.06	0.637	No	0	Yes	2.68
C1N(C2=CC=C(CCC(=O)NO)C=C2)C(=O)CCCCC/N=C(\N)C=NO[N+1]=NC=CC=C1	True	455.52	2.16	3	9	4	156.07	0.468	No	0	Yes	4.21
C=1CCC=CC(CN2C=C(CCC(=O)O)C=C2)=C(C=O)C(O)=C=1	True	313.35	2.95	2	4	6	79.53	0.625	No	0	Yes	4.27
C12S(=O)(=O)C=NOC([C@]1(Cl)C(=O)OC3=CC=CC(C)=C3)C2=O	True	343.74	0.59	0	7	2	99.1	0.442	No	0	Yes	5.21
C=1NCCC[C@@](NC(=O)OCCCOCCC(=O)NCCCNC)C[C@@H1]=1	True	369.49	1.05	4	6	12	100.72	0.384	No	0	Yes	3.26
C12C([C@@H1]O[C@@H1](C3OCCCCC4=CCC(O)CC4)CO[C@@H1]C[C@H1]O[C@@H1](O)[C@H1](O)[C@@H1]3O)[C@@H1]1CO2	True	469.55	1.01	4	9	9	127.07	0.289	No	0	Yes	6.2
NS(=O)(=O)CCC1=CN(C)C=C1C	True	202.28	0.16	1	3	3	65.09	0.759	No	0	Yes	3.01
CC#CCSC(CNS(=O)(=O)C1=CC=CC=C1)P(=O)(OCC)OCC	True	405.48	3.31	1	6	11	81.7	0.449	No	0	Yes	3.56
CNCC/C=C\CO[C@@]C=C[C@](C)([C@H1](OC(C)=O)CCCCCCCCC)C=O	True	407.6	5.04	1	5	19	64.63	0.141	No	1	No	4.38
O1C=C2C3=C(NCC4=CC=CO4)C=C1C(=C2O)[C@]3C(=O)O	True	284.25	1.92	3	5	4	91.93	0.782	No	0	Yes	4.64
C1CC(CCC(=O)NO)O[C@H1]1C(=O)O	True	203.19	-0.1	3	4	4	95.86	0.438	No	0	Yes	3.31
O1CCNC1=C(Br)C(=O)C2=CC=CC=C2	True	268.11	2.05	1	3	2	38.33	0.659	No	0	Yes	2.89
C12S(=O)(=O)[C@@H1]COC[C@@]1O[C@@]2(C)C3=CC=C(C=O)C(OC)=C3	True	324.35	1.26	0	6	3	78.9	0.779	No	0	Yes	4.59
CS(=O)(=O)[C@@H1]CCN(CC1=CC=NC=C1)C	True	241.34	1.11	0	4	6	50.27	0.748	No	0	Yes	2.8
C1C=2OC=CC=2CC[C@H1]1C(=O)O	True	166.18	1.47	1	2	1	50.44	0.687	No	0	Yes	3.21
C1[C@H1]CN(C(=O)/C2=C/C3=CC=C(O)C(OC)=C3Cl)C[C@@H1](OC4O[C@H1](CO)[C@@H1](O)[C@H1](O)[C@@H1]4OO1)COC2CCC(C)C	True	601.07	1.46	4	11	6	156.61	0.277	No	2	No	6.5
C1OC=CC=C(NC(=O)[C@@H1](CO)NC(=O)[C@@H1](C)O)C(C)=C1	True	296.32	-0.67	4	5	5	107.89	0.538	No	0	Yes	4.04
CCNC=C1/C=C2/C=NC3=CC4=CC(=C3C2=C1OC)CC(C)(C)O4	True	322.41	1.99	1	4	3	43.38	0.938	No	0	Yes	4.51
N1S(=O)(=O)CCC(=O)OCC2=CCN(C(=O)C3=CC=CC4=CC=CC=C34)[C@H1]2NCC1	True	429.5	1	2	6	1	104.81	0.518	No	0	Yes	4.15
NC(=O)NC1=CC=CC2=C1C=C3N(C2=O)C4=CC=CC=C43	True	277.28	2.46	2	3	1	77.12	0.56	No	0	Yes	2.24
CC(O[C@H1]1O[C@H1](CO)[C@@H1](O)[C@H1](O)[C@H1]1O[C@H1]2O[C@H1](CO)[C@@H1](O)[C@@H1]2)O[C@H1](O)COC(=O)C[C@H1]C(O)=C(CO)[C@@H1](O)[C@H1](O)[C@H1]O	True	615.56	-5.01	11	18	17	294.98	0.041	No	3	No	6.15
O1C[C@H1]C(=O)N[C@@H1](CCCCN)C(=O)N[C@H1](C)C(=O)N[C@@H1](CC(C)C)C(=O)NCC(=O)N(C)C/C=C\CCC[C@@H1](C)O[C@@H1]1C	True	623.82	0.92	5	8	6	181.19	0.214	No	1	No	5.38
FC(F)(F)C(F)(F)C(F)(F)C(F)(F)C(F)(F)F	True	288.03	4.02	0	0	2	0	0.673	No	0	Yes	2.06
C1C(CCC2=CC=C(/C=C/C3=CC=C(C(=O)O)C=C3)C2=CC=C1)NC(=O)OC[C@@H1](N)CO	True	436.51	3.35	4	5	7	121.88	0.52	No	0	Yes	4.36
C1CC(=O)N(CC[C@H1](NC(=O)CCC)C(=O)OCC2=CC=CC=N2)C1	True	347.42	1.42	1	5	9	88.6	0.683	No	0	Yes	2.76
O1/N=C/C2=CC=CC=C2C=C1OC	True	175.19	2	0	3	1	30.82	0.653	No	0	Yes	3.47
CC1(O)CO[C@@](C)(O)[C@H1]1OC(=O)C2=CC=CC=C2	True	252.27	0.7	2	5	2	75.99	0.758	No	0	Yes	3.58
C1CN(CC=C(OC)C=CC(OC)=CNC(=O)[C@@H1](N)COC(N)=O)C1=O	True	368.39	-0.67	3	7	10	146.21	0.263	No	0	Yes	4.15
C#CC1NC=C(CC2=CC=CC=C2)N=C1C	True	210.28	2.14	1	2	2	24.39	0.743	No	0	Yes	3.82
C1NCC2=CC=CC=C2C[C@H1]1C(=O)N[C@@H1](CC3=CC=C(O)C=C3)C(N)=O	True	353.42	0.87	4	4	5	104.45	0.64	No	0	Yes	2.97
CCN(C=C(O)C=CC(C(C)=O)=CCC(C)C)C(=O)CCN([11CH3])C	True	335.48	3.3	1	4	10	60.85	0.378	No	0	Yes	3.67
C1S(=O)(=O)O[C@H1]O[C@@H1](C2OC3=NC=C(C=C3OCO)C(=O)N(CCC4=CC=CC=C4)[C@H1](OCC5=CC=CC=C5)[C@@H1])OC=C1O2	True	625.63	2.76	1	12	12	152.18	0.233	No	2	No	6.02
O1C[C@H1]C2[C@@H1](N(C)C(N)=O)CC[C@]2(C)[C@@H1]1CC3=CC=C(O)C=C3F	True	335.4	2.47	2	3	3	75.79	0.891	No	0	Yes	4.54
O[C@@H1](CC12CC1(F)F)[C@@H1](COC(=O)C3=CC=CC=C3)O[C@H1]2O	True	314.28	1.34	2	5	3	75.99	0.824	No	0	Yes	4.28
O1CCOC=CC(NC(=O)CCCCCCCCCCCCCCC2)=CC(=O)C3=CC=CC=C3N=C12	True	494.68	7.33	1	5	0	76.99	0.41	No	1	No	4.37
C12CC=NN(C=C3C=CC=C1N3C)N2C	True	202.26	1.13	0	4	0	22.08	0.588	No	0	Yes	5.77
COC(=O)/C=C/CCCCC1CC1	True	182.26	2.69	0	2	6	26.3	0.358	No	0	Yes	2.23
CC(CC1)OCCN(C(=O)[C@H1]C2NCOC2)CC[C@H1]1C	True	283.39	1.19	1	4	2	50.8	0.827	No	0	Yes	4.67
C1CC[C@@H1]1[C@@H1](O)[C@H1]2O[C@@H1]2C#CCCCCCCCCCCCCCC3=COC(N)=N3	True	416.61	5.41	2	5	15	84.81	0.227	No	1	No	4.13
C1C=CC=C(C2=CC=C(NC)C3=C2OC(C)(C)C=CC4=CC=CC=C4O)C=CC(=O)[NH1]C=CC1=COC3	True	496.61	6.25	3	5	5	79.82	0.456	No	1	No	5.47
NC(=O)C(O)C(C)(C)[C@@H1](O)CO	True	177.2	-1.79	4	4	4	103.78	0.407	No	0	Yes	3.9
C1CC(=O)O/N=C(\C2=CC=C(Cl)C=C2)[C@H1]O[C@@H1](O)[C@@H1](OC(F)F)C(=O)[C@H1]([C@H1](O)C#N)NC1=O	True	488.81	0.42	3	10	4	167.54	0.402	No	0	Yes	5.32
OCCN1C=NC=C1	True	112.13	-0.12	1	3	2	38.05	0.579	No	0	Yes	2.38
C1/C(=C/C(C)=O)[C@H1](C)CCC=C(NC(C)=O)C1	True	235.33	2.73	1	2	2	46.17	0.748	No	0	Yes	3.75
C1CC[C@H1]2C3=C(OC[C@@H1]2CC(C)C)CC[C@@]31C	True	234.38	4.53	0	1	2	9.23	0.682	No	0	Yes	4.31
CCC(=O)NNC(=O)CCC(=O)OCC	True	216.24	-0.11	2	4	5	84.5	0.496	No	0	Yes	1.96
CNS(=O)(=O)C1=CC=C(C(OC)=C1NC)C=O	True	258.3	0.46	2	5	5	84.5	0.749	No	0	Yes	2.7
C1C(C2CC(=O)OC)[C@@H1]C[C@@H1](C)[C@](O)(CO)[C@]21O	True	257.31	-0.12	3	5	3	86.99	0.614	No	0	Yes	5.62
C12CC=CC(C(=O)OC(C3CCCCC3)[C@@H1](CC)C1)=C(O)C(C)=C2OC4O[C@H1](CO)[C@@H1](O)[C@H1](O)[C@H1]4O	True	508.61	2.39	5	9	5	145.91	0.353	No	1	No	6.08
C12CCCCC[C@](O)C3CCC(C)(C)[C@H1]1C23	True	221.36	4.15	1	1	0	20.23	0.651	No	0	Yes	4.73
C1NC=C(CN=CN2C(C)=NN=C2C)C3=CC=CC=C3NC1=CC	True	322.42	2.73	2	6	3	67.13	0.673	No	0	Yes	3.93
FC(Br)(F)C[C@@H1][C@H1]1CC[C@@H1][C@@H1]CC[C@H1]([C@@H1](O)CCCC(I)I)NC(N=[N+1]C)OC1O	True	721.18	4.89	3	6	9	88.18	0.18	Yes	1	No	6.58
C1C(O)C(=O)N(CC2=CC=CC=C2)C1C	True	205.26	1.17	1	2	2	40.54	0.787	No	0	Yes	2.84
O1CCCCNC(=O)CN(CC=C2C=C(OC)C(P(C)(C)C)C=C2)C3=CC=CC=C31	True	430.53	3.82	1	4	4	50.8	0.738	No	0	Yes	4.75
CN1CCN(CCC#N)C[C@H1]1O	True	169.23	-0.53	1	4	2	50.5	0.603	No	0	Yes	3.38
CCC(=O)O[C@@H1]1CC[C@@H1](C)[C@H1]CC[C@](C)(CCCN2C[C@@H1](C)C[C@@H1](O)C2O)OC(=C/C=NCC(=O)NCCCC[C@@H1]3NC(=O)C4C3C(O)C(OC(C)=O)C(C)C4OC1)O	True	836.06	3.11	6	14	7	225.78	0.203	No	3	No	7.74
C12C(OCC3=CC=C(Cl)C=C31)CCC[C@@H1][C@H1]([C@@H1](O)CC[C@@]4(C)CC5[C@@H1]C[C@H1]45)C/C=C\2	True	427.03	6.66	1	2	4	29.46	0.545	No	1	No	5.75
CN1CCS(=O)(=O)CC1	True	149.21	-0.65	0	3	0	37.38	0.459	No	0	Yes	2.71
CCCN(C(=O)C1=CC=C(OC(C)(C)C)C=C1)[C@H1](O)C(=O)O	True	309.36	2.12	2	4	6	87.07	0.786	No	0	Yes	2.83
CC(O)C[C@@H1](C)CCCC[C@@H1](O)CCC[C@@H1](C)O	True	260.42	2.87	3	3	11	60.69	0.501	No	0	Yes	3.55
CCCCCCCCCCCCCCCC(=O)N[C@@H1](CC(C)C)C(=O)OCC	True	397.64	6.56	1	3	19	55.4	0.198	No	1	No	2.52
C1CC(=O)NCCN1CC=CC=C(C2=CC=C(F)C=C2)C=C	True	300.38	2.77	1	2	5	32.34	0.848	No	0	Yes	2.86
CC=1C=NN(CCC2=CC=CC=C2Cl)C=1	True	220.7	3.09	0	2	3	17.82	0.778	No	0	Yes	1.99
C12SC=NC=C(C3=CC=CC=C3)N1C2=CC4=CC=CC=C4	True	290.39	4.44	0	3	2	15.37	0.76	No	0	Yes	3.42
C1OC(=O)N(C)[C@H1]N(C=O)[C@H1](O)[C@H1](C)O[C@@H1](O[C@@H1]2O[C@@H1](C(=O)O)[C@@H1](O)[C@H1](O)[C@H1]2O[C@@H1]1)OC(=O)/C(CO)=C/[C@H1](C)O[C@@H1]C3[C@H1](C4=CC=CC=C4)O[C@@H1]3C(=O)O	True	769.69	-1.38	6	17	11	287.05	0.086	No	3	No	6.91
C1C=CC2=C(C=CC=C2CCC(=C)[C@@H1]1O)C=CC=CC(C)(C)OC(=O)N	True	353.46	4.4	2	3	4	72.55	0.622	No	0	Yes	4.43
CN(CCC(=O)NC)CC(=O)NCCCCCCCCC(=O)NCCCN	True	385.55	0.37	4	5	17	116.56	0.27	No	0	Yes	2.31
C1CC[C@@H1]1CN2N=C(CC3=C[NH1]C4=CC=CC=C34)N=C2C	True	280.38	3.46	1	3	4	46.5	0.795	No	0	Yes	2.47
C1C=CC([C@@H1](C)NC[C@H1](N)C2=CC=C(O)C=C2OC)=CC=C1O	True	316.4	2.71	4	5	6	87.74	0.648	No	0	Yes	4.02
C=1CONC=CC=C(C(=O)O[C@@H1]2OCC(C)=CO2)CCC=C=1	True	305.33	2.23	1	6	2	66.02	0.623	No	0	Yes	5.66
C[C@@H1](O)C(=O)OCCC=C(C)C	True	172.22	1.27	1	3	4	46.53	0.394	No	0	Yes	3.01
CCC(CCC(C)C)C(N)=O	True	157.26	1.93	1	1	5	43.09	0.651	No	0	Yes	2.71
CCC(=O)CCCCCCCC(=O)NCC(C)C	True	255.4	3.47	1	2	11	46.17	0.575	No	0	Yes	2
C12CC[C@](COC(=O)C=[N+1]=[N-1])OC(=O)C1(CO[C@@H1]3O[C@@H1](C)[C@H1](O)[C@@H1](O)[C@H1]3OC(C)(C)OC[C@@H1])OC(=O)/C=C/C=C/C=C/2	True	591.59	0.61	2	12	10	192.68	0.09	Yes	2	No	6.44
C[C@@H1](O1)CC2[C@](C)C1CC2(C)C	True	167.27	2.8	0	1	0	9.23	0.539	No	0	Yes	5.1
C1C(NC(C)(C)CN(C)C)CCC1	True	184.33	1.86	1	2	4	15.27	0.717	No	0	Yes	2.53
CN(C)C(CC1=CC=CC=C1OC)CC(=O)OC(C)C	True	279.38	2.51	0	4	7	38.77	0.719	No	0	Yes	2.69
N1C(=O)[C@@H1]2CCCN2C(=O)[C@@H1](CC(N)=O)NC(=O)[C@@H1]3CCCN3C1=O	True	351.36	-1.95	3	5	2	141.91	0.53	No	0	Yes	4.01
N12C(=O)C=CC=C3C=C(CC4=CC(OC)=CC=C4C3=O)CCNC=C(C(OCCC5=CC=CC=C5)=C)NC=CC1=N2	True	548.64	4.71	2	7	6	92.03	0.508	No	1	No	5.02
C1OC(=O)C2=CC(OC)=CC=C2C1=O	True	192.17	1.05	0	4	1	52.6	0.624	No	0	Yes	2.17
CC(O)C(=O)NCCC1[C@@H1]C(=O)NCNC(=O)C2=CC=C(Cl)C=C2NC(=O)[C@H1](N)CCCCC3=CC=CN=C3CCN1	True	601.13	0.82	7	8	4	187.57	0.269	No	2	No	4.91
C1CC=C2C(COC3=CC(C)=NC([C@@H1]4C=CCCO4)=C3)=C(O)C(=O)C2=C1CCC	True	393.48	5	1	5	6	68.65	0.689	No	0	Yes	4.21
CCCCCCCCC[C@@H1](O)CCCC[C@@H1]1OC(/C=C/C(=O)N[C@@H1](C)C(=O)N[C@@H1](CCCCCC(OC)CC(CCCC(O)CCCCCCC/C=C\CCC/C=C\CCCC)COC)[C@@H1]OO[C@H1](O)[C@H1](O)[C@H1]1)N	True	1050.56	11.62	7	12	43	211.29	0.017	No	4	No	6.8
O1C(C=CC=C(CO[C@@H1]2O[C@H1](CO)[C@@H1](O)[C@H1](O)[C@H1]2OC[C@H1])CO[C@H1]1OC3)C=CC=CC3=CC=CC(=O)O	True	520.53	0.43	4	10	8	153.37	0.33	No	1	No	6.81
CC(C1C[C@@H1](C)C=C)OCCO1	True	170.25	2	0	2	3	18.46	0.603	No	0	Yes	4.15
OCC1=NC=C(N1CCCN(C)CCO)[C@@H1](O)C	True	257.33	-0.26	3	6	8	81.75	0.598	No	0	Yes	3.36
CCCCCCC[C@H1]OC(=O)[C@]1CC2C(C)(C)C3C1C=4C=CC([C@@H1]5OC(=O)[C@@]6(C)[C@@H1]5CC[C@@]6(O)C2)=CC(=O)C=4CO3	True	564.72	5.86	1	7	8	99.13	0.312	No	2	No	7.3
CC(COC(=O)C1=CC=CC(=C1)C(=O)C2=CC=C(Cl)C=C2C[C@@H1]C=O)C=O	True	385.82	3.51	0	5	9	77.51	0.375	No	0	Yes	3.29
C1OC(=O)NS(=O)(=O)C2=CC=CC=C2N=C1N	True	255.25	0.1	2	6	0	110.85	0.683	No	0	Yes	3.71
CCC1CCCC(CCCCO[N+1](=O)[O-1])O1	True	231.29	2.71	0	4	7	61.6	0.384	No	0	Yes	3.3
O1C(=O)C[C@@H1](O)[C@H1](C)CCC2C=C[C@H1](CC[C@H1]2C(C)CCC)[C@H1](OC(C)=O)[C@](OC)C3OC(=C)[C@@H1](O)[C@@H1]3OC(=O)C1=CC(O)C(C)C	True	663.83	4.54	3	11	7	158.05	0.152	No	2	No	7.01
C1N2N=C(C)N=C2C3=CC=CC=C31	True	171.2	1.62	0	3	0	30.71	0.514	No	0	Yes	2.43
C1OC(=O)CN2N=C(C3=CC=CC=C3OC(C)(C)C)C=C(O)C2=CC1=O	True	356.38	2.34	1	7	2	88.43	0.818	No	0	Yes	3.51
CCOC1C(=O)NC1=CC(=O)C(C)(C)C	True	211.26	1.02	1	3	3	55.4	0.56	No	0	Yes	3.74
C12N(CC3=CC=CC=C3C4=CC=C(C5=CC=C(Br)C=C5)N=C4)C=C1C2=O	True	403.28	4.83	0	3	4	33.2	0.626	No	0	Yes	3.02
C12N(C)C3=CC=C(C#N)C=C1[C@@]23CS	True	202.28	1.5	1	3	1	27.03	0.652	No	0	Yes	5.25
CC1OCCN1C(=O)NCCCN2CCN(C3=CC=C(Br)C=C3)CC2	True	411.34	2.35	1	4	5	48.05	0.756	No	0	Yes	2.88
N#C/C(=C\C1=C\C=CC=C1)C[C@@H1](O)C[C@H1]C2=CC=CC=C2/C=C	True	302.4	4.63	1	2	7	44.02	0.758	No	0	Yes	3.44
O1[C@H1]C2CC3(CC[C@H1][C@H1]2CC4[C@](C)[C@@H1](OCC5=CC=CC=C5)CC4CC3)O1	True	367.51	5.47	0	3	3	27.69	0.663	No	1	No	6.39
CCNC(=O)C=CCCC	True	141.21	1.48	1	1	4	29.1	0.59	No	0	Yes	2.35
C[C@@H1](O)[C@H1](C)[C@@H1](OC(C)=O)C(=O)[C@H1](C)C(=O)/C=C\[C@@H1](C)[C@H1](C)OC(C)=O	True	370.44	1.85	1	7	10	106.97	0.355	No	0	Yes	4.56
CC(OCCCCCCC(=O)O)[C@@H1](O)C[C@H1](OC(C)=O)[C@H1](C)CC1=CC=CC=C1	True	408.54	3.99	2	5	15	93.06	0.337	No	0	Yes	3.57
C1CNN=C(COC2=CC=C(C3CC3)C=C2)N=CN1	True	258.32	1.48	2	5	4	58.01	0.86	No	0	Yes	3.24
N#C/C1OCC(=O)O[C@@H1]C[C@@H1](O[C@H1]2O[C@H1](CO3)[C@@H1](O)[C@@H1](O)[C@H1]2OC(=O)C[C@@H1](OC(C)(C)C)[C@@H1]C)OC(C)(C)CCC(CCN1C)CCO[C@@H1]C3	True	713.84	2.57	2	15	5	184.7	0.396	No	2	No	7.72
CCC(=O)O[C@@H1]C1C[C@@](C2)C(=CCC[C@H1]2CC(OCC3=CC=CC=C3)O[C@H1](OC(C)=O)[C@]1)OC(=O)C4CCN(C)CC4	True	581.71	5.18	0	9	9	100.6	0.288	No	2	No	6.11
C1CCN1C(=O)C2=CC=C(O)C=C2	True	177.2	1.24	1	2	1	40.54	0.701	No	0	Yes	1.48
CC(C)(C)OOP(=O)(N1C=CC=C([S+1](C)[O-1])C=C1)OCCCCCCCCC	True	433.55	6.21	0	5	13	71.06	0.113	No	1	No	4.74
CC1C=C(C(=O)O)C(=O)C=C1C(C)(C)C	True	208.26	2.19	1	2	1	54.37	0.672	No	0	Yes	3.66
O1[C@]2C[C@@H1]2[C@H1](NC1=CC3CCCCC3)[C@@](C)C4C[C@@](O)(C[C@H1](OC(=O)N(C)C5=CC=C([N+1](=O)[O-1])C=C5)[C@H1]4OC)O	True	557.64	4.2	3	9	7	143.63	0.255	No	1	No	5.22
CC1=CC(OC2=CC=CC(Cl)=C2)=CC=C1N(C)C	True	261.75	4.51	0	2	3	12.47	0.806	No	0	Yes	1.84
O1C2=CC=CC=C2[C@@]1C=C(C(=O)O)C(=O)C=CC=C[C@@H1]C3=CC=CC=C3	True	344.37	3.9	1	3	7	63.6	0.358	No	0	Yes	3.3
C12C=CCC(C13)CCC(C)CC23	True	162.28	3.24	0	0	0	0	0.48	No	0	Yes	4.31
C1C(O)CN(C=C2C=CC(CN3N=NN=C3C4=CC=CC=C4Cl)=C2)C1=O	True	369.81	1.97	1	6	4	84.14	0.89	No	0	Yes	3.79
NC(=O)[C@H1](C1C2=CC=C(O)C=C2)NC(=O)CCCCCCCCCCCC3=CC(OC)=CC=C3N(CCCCNC(=O)CCNC(=O)[C@H1](N)[C@@H1](O)[C@H1](O)[C@](C)(O)C=C4COC(C5=CC=C(F)C=C5)=C4OC1)O	True	1005.2	4.49	10	14	4	288.49	0.172	No	3	No	6.05
C1C(O)CNC(=O)[C@H1]CN(CC2=CC=CC(C(N)=O)=C2)[C@@H1](C)CN(CC(=O)NCC(=O)NCCN3CCOCC3)C1=O	True	588.69	-2.55	5	9	10	186.64	0.196	No	1	No	4.33
C12CCC1[C@@H1](CC3C=C(C)C(=O)[C@H1]3CCC(C)OC(=O)C(C)(C)C)/C(OC(\C)C4=CC=C(OC)C(O)=C4O[C@H1](CO)C[C@@H1](C)CC2)CCC	True	684.95	8.76	2	8	10	111.52	0.235	No	2	No	5.87
C1CO/C(C)=C/C(=O)CC(=O)/C=C/C[C@H1]2[C@@H1](C)C(=O)O[C@@H1]2C1=O	True	320.34	1.53	0	6	0	86.74	0.497	No	0	Yes	4.75
N12C(=O)[C@H1]CCCNC(=O)COC[C@H1]1C[C@H1]2C(=O)O	True	269.28	-0.83	2	4	1	95.94	0.648	No	0	Yes	4.55
C1OC2=CC2([C@H1](C(=O)OC)[C@](O)[C@@H1](CC(=O)OC)C=C[C@@H1])OCC=C1O	True	365.36	1.25	2	8	7	111.52	0.649	No	0	Yes	5.4
CC(O)[C@@](O)[C@H1](O)C=C(C)[C@H1](O)[C@H1]OC(C)=O	True	246.26	-0.34	4	6	6	107.22	0.377	No	0	Yes	5
C1CCC=CC=C(C(=O)CC(C)(O)C(O)C(C)C(O)C(O)CCOCC)CCC[C@@]2(C)C1=CC[C@@H1][C@@]23CCCN3C(=O)CCCCS[N+1](=O)[O-1]	True	721.98	5.68	4	10	17	170.67	0.048	No	2	No	6.67
C1CC(=O)O[C@@H1]CC[C@H1][C@@H1]C/C=C2\CCNCCC1=C/C=C\CC[C@@]3(C)O[C@@H1]32	True	384.54	4.79	1	4	0	50.86	0.37	No	0	Yes	6.22
O/N=C(\N)C=CC1=C(CCCC[N+1]2=CC=C(C(=O)C3=CC=CC=C3C(=O)O)C(O)=C2O)C=C1OC	True	480.5	2.63	5	7	11	166.55	0.062	No	0	Yes	3.66
O1C2=CC=CC=C2[C@@]1C3=CC4=C(C=C3CN(C)C)OC(=O)OC4=O	True	324.31	2.13	0	6	3	72.89	0.735	No	0	Yes	3.12
CCCCCCCCCCCCCCCCCCCCCCCCOP(=O)([O-1])OCC[N+1](C)(C)C	True	519.79	8.8	0	4	28	58.59	0.059	No	2	No	3.19
CCCNC(=O)[C@@H1](CC1=CC=CC=C1)NC(=O)CCCCCCC(=O)OC2=CC(C(C)C)=CC(=C2O)[C@](C(=O)OCC)(C(=O)[O-1])C(C)=C	True	665.8	4.14	3	9	20	171.16	0.062	No	1	No	3.99
C1OC2=CC(OC)=C(OC)C(F)=C21	True	184.17	1.74	0	3	2	27.69	0.7	No	0	Yes	2.48
O1C(=O)NC=CC2=CC(Br)=CC=[N+1]21	True	242.05	0.86	1	2	0	42.21	0.685	No	0	Yes	4.39
N#CC(N)(O)C(F)F	True	122.07	-0.58	2	3	1	70.04	0.361	No	0	Yes	4.35
C12CC(=O)OC[C@H1]O[C@@H1]2N3C=C(C(=O)NCCO)C=CC(Br)=C3O[C@H1](C)[C@H1](O)[C@@H1](C)O1	True	502.34	0.42	3	9	3	126.79	0.471	No	1	No	5.69
C=12SC=CC=1C(C3[S+1]([O-1])CCC3=O)OC2	True	242.32	1.41	0	4	1	49.36	0.7	No	0	Yes	5.18
C=1OC=C(C)C(OC)=C(OC)C(=O)[C@]=1OC	True	226.23	1.48	0	5	3	53.99	0.729	No	0	Yes	3.4
C1CCOC2=C(CC)N=CN=C21	True	164.21	1.36	0	3	1	35.01	0.628	No	0	Yes	2.87
C1CNC(=O)COC(=O)CCCCCCC(=O)OC2=CC=C(C=C2O)C1	True	363.41	2.24	2	6	0	101.93	0.541	No	0	Yes	4.07
COC(=O)[C@H1](C)[C@H1](O)C(=O)OC	True	176.17	-0.67	1	5	3	72.83	0.577	No	0	Yes	3.05
CC(=O)NC1=CC=CC=C1/C=C(\C=O)C2CCCC2	True	257.33	3.42	1	2	4	46.17	0.663	No	0	Yes	2.6
O1C(C2=CC=CC(=C23)OC4=C(OC)C=CC=C4[C@@]3C5=C[C@@](C)(O)[C@@H1](OC(C)=O)CC[C@@]5C[C@@H1]1)O	True	463.51	4.32	2	7	2	94.45	0.641	No	0	Yes	5.13
CN1N=C(CCC2=CC=CC=C2F)C=C1C(C3=CC=CC=C3)C(C)C	True	336.45	5.13	0	2	6	17.82	0.61	No	1	No	2.86
C1NCC[C@](C2)C=CC[C@H1]C(C)(C)[C@@H1](O)CC[C@@](C)[C@@H1]2C/C=C\C=C(C)C1=O	True	384.58	4.95	2	3	0	49.33	0.621	No	0	Yes	6
C1CNC(=O)[C@H1](CN(C)CCC2=CC=CC=N2)NC(=O)OCC3=CC=CC=C3CN(C)C1=O	True	453.54	1.33	2	6	5	103.87	0.708	No	0	Yes	3.81
C=1C=CC=C(NC(=O)NCCC2=CC=CC=C2Cl)C(O)=C=1	True	302.76	3.23	3	2	4	61.36	0.748	No	0	Yes	3.2
C(=NCCC=CC=CC)OC1=C(C)C(=O)O[C@H1]1CCCC(C)C(=O)CCCCC(Br)C=C(C)CC(C)C	True	578.63	8.44	0	5	19	64.96	0.029	No	2	No	4.99
CC(CC)(CC)NC(=O)C1=NC=CS1	True	212.32	2.45	1	3	4	41.99	0.833	No	0	Yes	2.81
O[C@@H1]([C@H1](O)CCCC(=O)O[C@@])CC1[C@](C)C=CC=CC(C(F)=C(O)C=2[NH1]N=CC=2)=C(C)C1=O	True	458.49	3.2	4	7	9	132.74	0.33	No	0	Yes	5.57
C=C(COC=C(C)C)Cl	True	146.62	2.68	0	1	3	9.23	0.557	No	0	Yes	3.54
C1CC[C@@]1(OC(=O)C2=CC=CN=C2)C(C)(C)O	True	235.28	1.93	1	4	3	59.42	0.813	No	0	Yes	2.73
C1NC(=O)[C@H1](CCCCN)NC(=O)[C@H1](CCCCN)NC(=O)[C@H1](CC(C)C)NC(=O)[C@H1]([C@H1](OC)C(C)C)NC(=O)C2=CC=CC=C2[C@@H1]CCN(C)C/C(C)=C/[C@@H1]1C	True	798.11	2.8	7	9	13	210.01	0.116	No	2	No	5.72
C1C=CC(C)=C2C(=C1O)C(=O)[C@H1](O)[C@@H1]2CC/C=C(/C)C(=O)O	True	304.34	2.45	3	4	4	94.83	0.693	No	0	Yes	4.36
C12COC(=O)C=CC=CC(OCCCC3CCSC3SC4COC(C5=CC=C(C)C=C5)CC4)=CC1=C2	True	524.75	6.93	0	6	8	44.76	0.271	No	2	No	5.46
C=1C(C2=CC(OC)=C(OC)C=C2C=1)OC3OCCO3	True	264.28	2.12	0	5	4	46.15	0.833	No	0	Yes	3.58
CC(CC(CCC1)C(=O)N[C@H1](C2CC(=O)N3CCOCC3)C(C)COC(=O)CC)CCC(C)C=CC(O)=CC4=CC(=CC1=C42)C=CC(=O)C5=CC=C(O)C(O)=C5	True	770.96	7.26	4	9	9	162.7	0.089	Yes	2	No	6.58
C12[C@@H1]OC(COCCO)O[C@H1](OC(=O)/C=C(\C)C1OCO)[C@@H1]2O	True	333.31	-1.33	3	9	6	123.91	0.308	No	0	Yes	5.92
C1=C(C)C(=O)N(CN[C@@H1](C)COC2=CC=C(C)C=C2)C3=CC=CC=C3N=C1C(C)/N=C(\C)C4=CC=CC=C4	True	508.67	6.27	1	5	9	66.29	0.346	Yes	2	No	3.76
CC1C2=CC(CN3C[C@H1](O)C[C@H1]3C(C)(C)C)C2=C(C)C1=O	True	289.42	2.56	1	3	2	40.54	0.849	No	0	Yes	4.73
C12CN=C(O3)C=C(C=CC=C3[C@H1]1C2(C4)C)[C@@](C5)CC[C@H1]C(C)(C)[C@H1](OC(C)=O)CC[C@]5(C)C4=O	True	463.62	5.73	0	5	1	64.96	0.466	No	1	No	7.45
C1CNC(=O)C2=CN(C3)C=CC=CC3=C21	True	200.24	1.09	1	2	0	32.34	0.634	No	0	Yes	4.75
C=1S(=O)(=O)CCNC=C(C(=O)NCCCN(C)C)NC(=O)[C@H1]([C@H1](O)[C@@H1](O)C2=CC=CC(N=[N+1]=[N-1])=C2)N=1	True	522.59	-0.54	5	10	9	209.19	0.123	Yes	1	No	5.24
CCC(=O)C=C(C)C(/C=C/[C@@H1](C)C[C@@H1](O)CC(=O)O)=CO	True	296.36	2.77	3	4	9	94.83	0.345	No	0	Yes	4.25
CCS(=O)(=O)C[C@@H1](CC(=O)N[C@@H1](CC(=O)O)C(=O)O)C(C)C	True	337.39	0.13	3	5	10	137.84	0.515	No	0	Yes	3.31
C12C=CC=C(NC(=O)NC3=CC=C(O)C=C3)C(C(C)C)=C1C2=O	True	310.35	3.12	3	3	3	78.43	0.751	No	0	Yes	3.39
CCCCCCC1=CC(=O)C2=CC=CC=C21	True	214.31	4.24	0	1	5	17.07	0.67	No	0	Yes	2.12
C1#CC[N+1]CCC[N+1]CC[N+1](C)(C)CC(=O)C(=C\C=C\C=C2\C=CC=C(OCC3=CN(C4=CC=C(F)C=C4)N=N3)C(C)(C)C2=C1C)C(=O)[C@]OC	True	693.84	4.64	0	7	7	111.51	0.237	No	1	No	5.69
O1/N=C/C2=CC=C(C=O)N12	True	136.11	0.74	0	4	1	47.51	0.543	No	0	Yes	4.2
OC(=O)N1CCC[C@H1]1C(N)=O	True	158.16	-0.39	2	2	1	83.63	0.545	No	0	Yes	2.51
CCCCCCC(=O)NC(=O)N[C@@H1](CC1=CC=C(O)C=C1)C(=O)N(C2C3=CC=C(C(Cl)=[N+1]3)C2)CC(F)(F)F	True	555	4.06	3	5	11	112.84	0.358	No	1	No	4.9
C=1C(OCCCCCC2OCCCC2)CCC[C@@](C)CC[C@H1](OCCCN)C(O)[C@H1](O)[C@H1](C)C[C@@H1](O)C[C@@H1]=1	True	540.81	4.85	4	7	11	114.4	0.219	No	1	No	5.22
C1C(O)COP(=O)([O-1])OP(=O)(O)OC[C@H1]NC(=O)[C@H1](OCS(=O)(=O)OC2=CC=C(/C=C/C3=CC=CC=C3)C=C2N)[C@H1]1OP(=O)(O)O	True	730.47	0.63	6	15	9	299.83	0.089	No	3	No	5.97
C1C(C)C[C@]2(C)CCC[C@](C)(C2)[C@@H1](O)[C@H1]1[C@H1]C	True	237.41	4.2	1	1	1	20.23	0.724	No	0	Yes	5.53
C1[C@H1](O)CC2/C=C(\C)CC[C@@H1]C[C@]21O[C@]O[C@](COC(C)=O)C(O)[C@@H1](NC(=O)CCCCCCC)CCCCCCCCOC(=O)CCC	True	691.95	7.24	3	9	26	140.62	0.049	No	2	No	5.17
CCC(=O)O[C@H1]1CC[C@H1][C@@H1]1C(=C)C(=O)C[C@](C)CCC(C)(C)C	True	320.47	4.86	0	3	8	43.37	0.474	No	0	Yes	4.49
CC(O)CF	True	78.09	0.34	1	1	1	20.23	0.479	No	0	Yes	3.18
C1CC(=[N+1](C)C2=CC=CC=C2C)[C@@H1]C[C@H1](CC3=CC(O)=CC=N3)C4=CC5=C(C=C41)OCO5	True	428.53	5.11	1	4	3	54.59	0.59	No	1	No	3.84
O1/NC(=O)C=CC2=C(C=C3C=CC(=O)C=C3OC=C2C4=CC=C(O)C(O)=C4OC)C1O	True	423.38	1.66	4	8	2	134.55	0.528	Yes	0	Yes	4.44
CC1C(CCCC2=CC=CC=C2)OCO1	True	206.28	2.77	0	2	4	18.46	0.754	No	0	Yes	2.96
C12=CCN[C@@H1]CC3[C@](C)C4=CC[C@H1]5C(C)(C)[C@@H1](O)CC[C@]5(C)C4=CC[C@@]31CC2N	True	394.6	4.46	3	3	0	58.28	0.532	No	0	Yes	5.98
O1[C@H1](CN[C@@H1](C)C(=O)NCCCCCCCCC(C)C)C(=O)O[C@H1]COC(=O)O[C@]1(C)F	True	461.55	3.37	2	8	13	112.19	0.317	No	0	Yes	4.78
OC(C1=CC=C(Cl)C=C1C(F)F)C2CN=C(S)NC2=O	True	320.75	2.34	3	3	3	61.69	0.749	No	0	Yes	4.21
C1OC=C2C=C([C@@](C)N(C3C4=CC=CO3)C1=O)CC=C(O)C[C@H1](CNC(=O)C5=CC=CC=C5)C(=O)C(C)(C)C(=O)[C@H1](C)C(=O)[C@@H1](C)[C@@H1](O)[C@]2(C)C=C4	True	711.83	5.23	3	9	3	159.54	0.357	No	2	No	7.12
CC(=O)NCCN(C(=O)CN1CCCC[C@H1]1C(=O)OCCC)CCC(=O)NC2=CC=CC=C2	True	460.58	1.79	2	6	12	108.05	0.461	No	0	Yes	2.83
O1/N=C\C=CC=C(CCCOC2=CC=C(F)C(Cl)=C2C3=NN=CN3N)C(=N)N1	True	405.82	2.38	3	8	6	131.63	0.426	No	0	Yes	3.96
C1=2[C@]C(=O)[C@H1](CCN1C(=O)CCl)[C@H1]=2	True	197.62	0.62	0	2	1	37.38	0.578	No	0	Yes	5.38
C1CCN1C(=O)C2C=CC3=C(/N=C/C(=O)OC(C)(C)CC3)C2C	True	316.4	2.48	0	4	1	58.97	0.698	No	0	Yes	4.76
CCC1C(=O)N(CC2=CN(CC3=CC=C(Br)C=C3)N=N2)CCO1	True	379.26	2.23	0	5	5	60.25	0.8	No	0	Yes	3.01
C1CN[C@@H1]CCC=CC(C)=C[C@@](C)(C(=O)O)[C@H1](O)C(=O)C(=O)N[C@@H1]1C(C)C	True	379.48	1.59	4	5	2	115.73	0.542	No	0	Yes	5.2
O1/N=CC=C/C=C\CCCC(=O)C[C@]12CO2	True	221.26	1.97	0	4	0	51.19	0.587	No	0	Yes	4.96
C1C(CNC(=O)C(CC2CC=CC2C=O)C(=O)O1)C=O	True	279.29	-0.13	1	5	4	89.54	0.335	No	0	Yes	4.99
O1C(C2=CC=C(Cl)C(O)=C2C1)=C(F)C(O)=CCC=C(C)C	True	310.75	5.01	2	3	3	49.69	0.609	No	1	No	3.69
C1OC(=O)[C@H1](CC2=CC=CC=C2)NC(=O)[C@@H1](CC3=C[NH1]C4=CC=CC=C34)NC(=O)[C@H1](CC5=CC=C(O)C=C5)NC1=O	True	554.6	1.91	5	6	6	149.62	0.23	No	1	No	4.12
C1NN=C(CCSC2N=C(N)NN2CCO)NC=NC=C1C	True	326.43	-1.04	5	10	6	122.66	0.422	No	0	Yes	5.48
C1N(CC2=CC=C(C#N)C=C2C=O)CC1	True	200.24	1.58	0	3	3	44.1	0.696	No	0	Yes	2.29
CN(C)CCN1C=CC(N)=NC1=O	True	182.23	-0.61	1	5	3	64.15	0.677	No	0	Yes	2.42
C#1CNN=NC(C(NC2=C(C)C=N2)=CC3CCCCC3O)=NC#1	True	312.38	1.66	3	7	4	93.73	0.689	No	0	Yes	5.62
C1CNC(=O)[C@H1](CC2=CC=CC(Cl)=C2)NC(=O)[C@H1](CC(N)=O)NC(=O)[C@H1](CC3=CC=CC4=CC=CC=C34)NC1=O	True	564.04	1.13	5	5	6	159.49	0.303	No	1	No	4.12
CC[C@](O)([C@H1](C)OC(=O)C1=CC=C(OC)C=C1O)CC(C)C	True	310.39	3.13	2	5	7	75.99	0.757	No	0	Yes	3.32
O1C(=O)NC=CC=C(S(=O)(=O)NCCN(C(=O)O[C@H1]2C[C@@H1]C3NCCC[C@H1]32)C[C@@H1](O)[C@H1]O)COC1=C	True	528.58	0.21	5	10	9	175.76	0.278	No	1	No	5.9
C/C(=C\C=C1C(OCC2=CC=CC3=C2OC)=CC4=C1C(=O)C=C(N[C@H1]5CS(=O)(=O)C[C@H1]5C(C)C)C(OC)=C4)CCC3C6=CC=CC=C6O	True	669.84	7.08	2	8	6	111.16	0.287	No	2	No	5.78
C123OC(=O)[C@H1](C)C[C@H1]CC[C@H1]([C@H1]4CC[C@@H1]([C@H1](C)[C@H1]5OC(=O)CC(O)CC5=O)[C@@H1](O)C1)C2C4C3	True	461.58	2.61	2	7	2	110.13	0.608	No	0	Yes	7.2
C123C[C@@H1]C=4[NH1]C=CC=4[C@@H1](C)[C@@H1]1O[C@H1]2[C@@H1]3	True	187.24	2.05	1	1	0	25.02	0.66	No	0	Yes	5.95
CN1N=C2C=C1[C@@H1](F)C2	True	126.13	0.99	0	2	0	17.82	0.506	No	0	Yes	5.09
C[C@@H1](NC(=O)CNC(=O)[C@@H1](N)CCCNC(=N)N)[C@@H1](N)COP(=O)(O)O	True	397.37	-3.37	9	7	12	238.9	0.068	No	1	No	3.85
CCOC(=O)N[C@H1](CO[C@H1]1O[C@H1](CO)[C@@H1](O)[C@@H1](O)[C@H1]1OCC)C	True	337.37	-1.02	4	8	8	126.71	0.443	No	0	Yes	3.91
C=1CNC=C(COC(C2=CC=CC=C2)(C3=CC=CC=C3)C4=CC=CC5=C4C=COCC(=O)OC)C5C(OC(=O)CC[P+1](N)(CNC6=CC=C(O)C7=NC=C8C=C76)C=O)C=C8C=1	True	837.89	7.4	4	12	7	171.33	0.042	No	3	No	7.19
C1CC=CC=CN(C)C2CNC(=O)C3=CC=CC=C3SN(CCCC(=O)NC4=CC=C5C=CC=CC5=C4CC/C=C(\C)C(=O)OCC)C6C2C=CC=C16	True	730.98	8.4	2	7	10	90.98	0.123	No	2	No	6.21
C1=2C[C@](CO)CC[C@](C)[C@@H1]([C@H1](O)CCCC(C)(C)O)C1[C@@](O3)C4[C@@H1](OC(C)=O)CC(C)(C)[C@@H1]4CC[C@@]3(C)[C@@]=2C	True	545.78	5.89	3	6	7	96.22	0.273	No	2	No	6.31
C1NC2OCC(O)CC2C1=O	True	157.17	-1.12	2	4	0	58.56	0.467	No	0	Yes	4.72
CNC(=O)C1=CC=CC=C1NC(=O)C(=CC[C@]2(C)[C@H1]3CC[C@H1]2[C@@](C4)CCCN(CCCO4)C3OC)C=O	True	510.66	3.6	2	6	7	96.97	0.252	No	1	No	6.15
CCNC(=O)[C@H1](C)NC(=O)CCCCCCCCCCC	True	298.47	3.55	2	2	13	58.2	0.511	No	0	Yes	2.33
C1CCC1=O	True	70.09	0.74	0	1	0	17.07	0.411	No	0	Yes	1.69
O1[C@H1]2CC[C@H1]C[C@@]2(CC[C@@H1]1CC[C@@])CO	True	208.3	2.27	1	2	3	29.46	0.771	No	0	Yes	5.33
O1/N=C/CCN(C2=NC3=C(S2)CCCN3C(=O)C4=CC(N)=CC(O)=C4)C5=CC=CC(F)=C5NC=C1OC=O	True	538.56	4.09	3	11	4	142.61	0.331	No	2	No	4.37
CN(CC1=CC=CC=C1)[C@H1]2CC(=O)N(CC3=CC=CC=C3)C2CCN(C(=O)CCCCCSC4=NC=CC=C4C(=O)NCCO[C@@H1](CNC(=S)NCCOCCOC(=O)CSC5=CC=CC=C5CCC6=CC=CC=C6)C)C7=CC=C(O)C=C7C	True	1196.62	10.21	4	13	35	174.9	0.013	No	3	No	5.27
O1C2=C3C=CC=C2C1C[C@@H1]O[C@@]3OC(C)C	True	218.25	2.96	0	3	2	27.69	0.763	No	0	Yes	5.01
C1N(CCCCNC(=O)/C(=N/OCC)CC2=NN=CN2)CCC=C3C4=CC=CC=CC=CC=CC(C=CN4C5=C[C@H1]C3)=CC=C1C5(C)C	True	646.86	6.59	2	7	10	98.74	0.169	No	2	No	6.26
O1C(C(=O)C2=CC=C(O)C(O)=C2)CC1	True	194.19	1.07	2	4	2	66.76	0.546	Yes	0	Yes	2.68
N12C(=O)C=CC=C2CCC(C3=CC=C4C=C3)C5=CC(C(=O)O[C@H1]6CCCCC6C)OC(CO)=CC5=C41	True	485.58	4.47	1	6	3	77.76	0.649	No	0	Yes	5.65
C1CN(CCCN(C(C)=O)C(CCCC(O)CO)CCN)OC(=O)C2=CC(OC)=C(OC)C=C2OC3=CC=C(C=C3)C1=O	True	601.7	2.94	3	11	14	161.09	0.292	No	2	No	5.36
COC1=C(C=CC2=C1C(=O)NS(=O)(=O)C3=CC=NC=C3C4)CC2=CN4C	True	371.42	1.55	1	6	1	88.6	0.818	No	0	Yes	4.93
N1=CN(C)C1=NCOC(C2=CC=CC=C2)=CCOC3=CC=CC=C3	True	321.38	3.41	0	3	7	46.42	0.734	No	0	Yes	3.09
O1[C@H1][C@H1]C(OCC2=CN=CC=C2S(C)(=O)[C@H1]O[C@])(C)[C@@H1]1C3[C@]OC(=O)O3	True	379.39	1.38	1	8	7	93.18	0.561	No	0	Yes	6.46
C12[C@]C3=C[C@@](OO3)[C@@]1(C4)CC5[C@H1][C@@H1]CC[C@H1](C(=O)OC(=O)C=C(C)C)C(=C/[C@@H1]42)CC5=O	True	421.47	3.84	0	6	2	78.9	0.222	No	0	Yes	6.54
C/C(=N/OC1C=CN=CSC(O)=N1)C(C)C	True	241.32	2.56	1	5	3	66.54	0.61	No	0	Yes	5
O1COC(=O)C=C1[C@H1]2O[C@@]2C	True	155.13	0.35	0	4	1	48.06	0.405	No	0	Yes	4.14
CC(C/C=C\C[C@@H1](O)[C@@H1](C)O[C@@H1]1O[C@H1](CO)[C@@H1](O)[C@H1]1)O[C@@H1]CC[C@@](C)[C@H1](O)CC[C@@](C)[C@@H1]C[C@H1](OC(=O)C=CC=C(C2=CC=C3C=C(OC)C=CC3=C2OC)CC)C=O	True	822.03	6.97	4	12	28	170.44	0.017	No	3	No	6.26
CNC(=O)[C@H1](CC1=CC=CC=C1)NC(=O)C(CCN)N	True	278.36	-0.86	4	4	7	110.24	0.52	No	0	Yes	2.67
C1CNCC2=CC=CC=C2[C@@H1](OC(C)=O)[C@H1](CC#N)N[C@@](C3)(O)COC(=O)/C(C)=C\C=C\[C@H1](C)[C@H1](OC(=O)NCCCCCC(=O)NC4=CC=CS4)C=C(CO)C(C1)N(C)CC3	True	877.12	5.78	6	14	11	211.58	0.068	No	4	No	6.68
O1C2=CC=C(O)C(N)=C2C1=CC=C(O)C(O)=C	True	233.22	2.22	4	5	2	95.94	0.272	No	0	Yes	3.59
O1CCNC(=O)NC[C@H1]CN(CC2=CC=CC=C2)C[C@@H1]CC[C@H1](N3C=C(OC4=CC=C(Cl)C=C4)N=C3O[C@H1](CO)[C@@H1](O)[C@@H1])O[C@H1]1NC(=O)[C@H1](CCCC)NCCNC(=O)[C@H1]([C@H1](C)CC)NCCNCCCNC(=O)[C@H1]CC[C@H1][C@H1]	True	1120.83	4.34	10	16	33	262.96	0.038	No	3	No	6.95
CC(C(=O)NCCOCCOCC1OC2=CC=CC=C2C(=O)NOC(C)(C)C[C@@H1]NC(=O)[C@H1](C)OCC[C@]C)(O)[C@H1](OC(N)=O)CSSC[C@H1](C(=O)NC(CC(C)C)C(=O)NCC(=O)ON)C(=O)[C@H1](CO)NC1=O	True	1088.25	-1.08	10	21	22	382.92	0.029	No	3	No	6.77
C=1OC=CC=C(C2=CC(=O)C[C@@H1](COC(=O)OC)C2)[C@@H1]=1	True	276.29	2.66	0	5	3	61.83	0.741	No	0	Yes	4.06
O1/N=C(\C=C\C2=CC=CC(C3=CC=C(O)C=C3)=C2)C(O)=C1Cl	True	313.74	4.58	2	4	3	66.49	0.743	No	0	Yes	2.58
CC1(O)C[C@H1]O[C@](CC2=C(C)C)C(O)=C(C(=O)C(=O)C(OC)=CC(O)=CC(=C)C)O[C@]2(C)CCC(O)C(C)C(OC(C)=O)C/C=C(\C)CCC=C(C)C=C(O)C=C1OCC(O)CNC=C(CC)C=CC	True	978.23	9.76	7	15	15	230.77	0.02	Yes	4	No	7.77
COC=CC(C1=CC=C(OC)C=C1C(F)F)F	True	246.23	3.8	0	2	5	18.46	0.735	No	0	Yes	3.47
CCNC(=O)[C@H1](C(C)C)N(C)C(=O)OC(C)(C)C	True	258.36	2.01	1	3	4	58.64	0.839	No	0	Yes	2.76
C1C2=CC=CC=C2N1C	True	119.17	1.64	0	1	0	3.24	0.501	No	0	Yes	1.86
CC(CCC(=O)CC(O)[C@H1](CC1=CC=CC=C1OC)/C=C/C(=O)OO)O[C@@H1]2O[C@H1](CO)[C@@H1](O)[C@H1](O)[C@H1]2O	True	528.55	-0.27	6	12	14	192.44	0.105	No	3	No	4.75
C12S(=O)(=O)CC[C@@H1]CN(CCCCC3C(=O)NCCN(C)C)CC[C@]1C[C@@](C)[C@@H1]2CC[C@]4(C)C=CC(=O)[C@@H1]4[C@@H1](O)[C@](C5)CC[C@H1](C)C[C@]5(O)C3=O	True	730.03	3.72	3	9	4	144.32	0.369	No	1	No	7.68
O1C[C@H1]C[NH1]C=C(C1)O[C@@](C#N)(CCSCC2=CC=CC=C2)[C@H1](NC(C)=O)CC[C@@](C)[C@](O)(CC(C)C)[C@H1](O)C(OC(C)=O)C	True	645.86	4.22	4	10	18	150.14	0.135	No	1	No	5.45
C1=2[C@@H1]CC[C@]C[C@]1CCOC(=O)[C@]=2CC	True	204.27	2.68	0	2	1	26.3	0.614	No	0	Yes	4.58
C1CC2NC(=O)[C@]34CCCC[C@H1]3CC[C@@H1]1[C@]42O	True	235.33	1.6	2	2	0	49.33	0.67	No	0	Yes	4.95
O=C(CO)[C@@H1](C)[C@H1](O)[C@H1](C1)C(=O)/C=C\[C@H1](C)C[C@](C)O[C@H1]O1	True	312.36	1.03	2	6	4	93.06	0.805	No	0	Yes	5.57
CC(O)[C@@H1](O)/C=C/C(=O)O	True	146.14	-0.63	3	3	3	77.76	0.463	No	0	Yes	3.46
CCCCCC1CNCCCN(C(=O)[C@@H1](NC(C)=O)C(C)C)CCCNC(=O)C2CC/C=C/CC/C=C/C(O)CCC[C@H1](OS(=O)([O-1])CCCC[N+1](C)(C)C)OC2O1	True	844.21	4.51	5	10	14	178.59	0.072	No	1	No	6.1
C12CC3=CC=CC=C3[C@]1OC[C@@]4(C)OC(C)(C)[C@@H1]2O4	True	259.32	2.68	0	3	0	27.69	0.717	No	0	Yes	5.09
COCOC[C@@H1]OP(=O)(O)OC[C@H1]1O[C@@H1](N2C=CC(N)=NC2=O)[C@H1](O)[C@H1]1OC(C)=O	True	452.33	-1.07	3	13	11	190.89	0.159	No	1	No	4.6
C1CN(CC(=O)NCCC2=CC=CC=C2)C[C@H1]1C3=CC=C(F)C=C3	True	326.42	2.97	1	2	6	32.34	0.885	No	0	Yes	2.24
O1C/C=C\CCC(=O)N[C@@H1](CC2=CC=CC=C23)C(=O)NC(C(=O)N(C)CC4=CC=CC=C4)CSC13	True	493.63	2.97	2	5	3	87.74	0.642	No	0	Yes	5.08
C1/C(=C\C=C/CCOC2COCCOC=CC=C(CCOCCC(=O)OC[C@H1]3O[C@@H1](O)[C@@H1](O)[C@@H1]3O)N=CC=C1C=C4C=COCCN5CCCC5)C=C4C2=O	True	766.88	2.93	3	14	13	175.04	0.142	No	2	No	7.12
C1SC2=NC3=CC=C2[C@@]1C(C)(C)O[C@](C)O3	True	235.31	2.81	0	4	0	31.35	0.692	No	0	Yes	5.67
O/N=C/[C@H1]O[C@H1]C[C@@H1](OC1O[C@H1](CO)[C@@H1](O)[C@H1](O)[C@@H1]1O[C@H1])O[C@@H1][C@@H1](CO)O[C@H1]O[C@@H1]O[C@H1](C2O)[C@@H1](O[C@H1]O[C@@H1](C3O)[C@H1](O)[C@@H1](O[C@@H1]4O[C@H1](CO)[C@@H1](O)[C@H1](O)[C@H1]4NC(O)C3O)[C@@H1]2O[C@@H1]5OC[C@@H1]O)[C@H1](O)[C@H1]5OC=[C@H1]	True	1062.93	-8.36	16	32	25	466.29	0.01	No	3	No	8.48
C1NCC2=CC=CC3=C2[C@@](O)(C1)N(C)C(=O)CO3	True	248.28	0.18	2	4	0	61.8	0.687	No	0	Yes	3.58
CC1CC=NC=2[NH1]C(N)=NC=21	True	150.19	1.2	2	3	0	67.06	0.583	No	0	Yes	4.39
CCC(=O)N1CCC[C@H1]1C(=O)O	True	171.2	0.47	1	2	2	57.61	0.657	No	0	Yes	2.38
C1[C@@H1]2CCC=C[C@]2(C)[C@H1]1C(=O)O	True	166.22	2.06	1	1	1	37.3	0.605	No	0	Yes	4.14
CC(=O)N[C@H1](C(=O)O)[C@H1]O[C@@H1]	True	158.13	-0.58	2	3	4	75.63	0.574	No	0	Yes	4.28
CC=CC=C(CC)C(OC(=O)CC(O)CCC)=C(O[C@@H1]1O[C@H1](CO)[C@@H1](O)[C@H1](O)[C@H1]1O[C@@H1]2OC[C@H1](O)[C@H1](O)[C@H1]2O[C@@H1]3O[C@@H1](C)[C@H1](O)[C@@H1](O)[C@H1]3O)NC=O	True	751.78	-2.96	10	18	17	292.85	0.031	No	3	No	5.97
C1CN(C(=O)[C@@H1](N)CC2=CC=CC=C2)CC1	True	218.3	1.18	1	2	3	46.33	0.828	No	0	Yes	2.07
C=1CNN=C(C2=C3C=C(NC4=C(F)C=CC=C42)CC3)N=C=1	True	280.31	2.83	2	4	1	48.78	0.831	No	0	Yes	5.18
C1NCC2N(C3=NC(C4=CC=C(O)C=C4)=CN3CC5CCCCC5)C(=O)N12	True	367.45	2.96	2	5	4	73.63	0.871	No	0	Yes	3.53
C1CC2=CC=CC=C2[C@@H1]1C	True	132.21	2.74	0	0	0	0	0.509	No	0	Yes	2.29
NC(=O)[C@H1](CC(N)=O)NC(=O)[C@H1](CCC(=O)O)NC(=O)C1=CC=C(C2=CC=C([S+1](C)CCCC)C2=S)CC(=CO1)CCOCS3SCCN3	True	757.01	2.07	7	10	20	212.17	0.031	Yes	2	No	5.82
COC(=O)[C@@H1](C)OP(=O)(OCCN1C=NC(C(N)=O)=C1)OCC(C)C	True	377.33	1.36	1	9	11	131.97	0.451	No	0	Yes	3.78
O1[C@H1]CNC=C(CN2CCC(F)(F)[C@@H1](O)[C@H1](O)C2)N(O3)C1=C([C@@H1]O[C@H1](COP(=O)(O)OCC(F)(F)F)[C@H1]3CCC(=C)[C@H1]OC(C)=O)[C@@](C)O	True	735.59	2.73	5	14	13	188.95	0.105	No	2	No	6.14
CC1=CC=C(C=C1OC2=CC(OC)=C(OC)C=C2OC)[NH1]C(C)=O	True	331.37	3.77	1	5	6	66.02	0.873	No	0	Yes	1.88
CC=CC=C1OC(=O)NCCOCCNC=C(CN(CC2=C[NH1]C3=CC=CC=C23)C(=O)N[C@@H1](CCC(=O)O)C(=O)N[C@@H1](CO)C(=O)N[C@@H1](CCCN4CCC(O)CC4)C(C)(C)C)C1=O	True	895.07	2.42	9	12	18	263.99	0.098	No	3	No	5.48
O/N=C(\N)C(C)C=C(C)C	True	142.2	1.34	2	2	2	58.61	0.201	No	0	Yes	3.84
C#1CC=NN(CC2=CN(C)C=N2)C#1	True	174.21	0.57	0	4	2	33.42	0.614	No	0	Yes	4.75
C1COC=CC(O)=C1[C@@H1]2O[C@H1](CO)[C@@H1](O)[C@H1](O)[C@H1]2O[C@H1]O[C@H1](CO)[C@@H1](O)[C@H1](O)[C@@H1]	True	419.4	-2.47	7	11	9	178.53	0.211	No	2	No	5.75
N1C(=O)[C@H1]2O[C@@H1]2[C@](C)(O)[C@H1]1OC	True	173.17	-1.39	2	4	1	71.09	0.479	No	0	Yes	4.82
OC(CCN1C=CN=C1C2=CC=CS2)C(=O)O	True	252.29	1.45	2	5	5	75.35	0.844	No	0	Yes	2.95
CC=CC(=O)C(C(=O)/C(C)=C/CSC1(C)CC)=C([C@H1](CC[C@@H1](O)CC(=O)CCC2=CC=CC(OC)=C2O)C[C@H1]O[C@@H1]C[C@@H1](O)COCCOCCOCCOCCOCCOCCNC)CC1	True	964.27	6.5	4	16	39	197.77	0.032	No	3	No	6.19
CCC(=O)N[C@H1](CC1=CC=CC=C1)C(=O)N[C@H1](CCCC)C(=O)N[C@@H1](CC(C)C)C(N)=O	True	446.59	1.82	4	4	14	130.39	0.347	No	0	Yes	3.08
C1C(C2=C(C(=O)O)N3CC4(CCC4)CC3(C)C)(C2)[C@@H1]1O	True	277.36	2.13	2	3	2	60.77	0.759	No	0	Yes	5.18
C1CC(=O)N[C@H1]2CCNCN2C=CC(CC3CCNC3=O)=C1	True	304.39	0.44	3	4	2	73.47	0.692	No	0	Yes	4.96
CCC(=O)N1[C@H1][C@@H1](CO)CC[C@](CCO[C@@H1]O[C@H1](C)[C@@H1](F)[C@@H1]O[C@@H1])(O[C@@H1]2O[C@H1](CO)[C@@H1](O)[C@H1](O)[C@H1]2O)[C@@H1]1NCOCC	True	609.66	-0.63	6	13	18	188.87	0.085	No	3	No	6.3
N#CCC(=O)[C@@H1](NC(=O)[C@@H1](C)NC(=O)[C@H1](CC1=CC=CC=C1)NC(=O)[C@@H1](N)CC2=CC=C(O)C=C2O[C@@H1](C)CCCl)C(=O)O	True	630.1	0.94	6	9	17	220.94	0.107	No	2	No	4.25
CCCCSC[C@H1](NC(=O)[C@H1](CCCCN)NC(=O)C1=CC=CC=C1N)CC2=CC=C(C=C2)OC(COC(=O)CCCCCCCCCCCC)O[C@@H1]C(=O)NCC(=O)N[C@@H1](C)C(=O)N[C@@H1](CCCCN)C(=O)N3CCC[C@@H1]3C(=O)N[C@@H1]C	True	1179.58	6.02	9	15	45	317.73	0.016	No	4	No	5.73
CN(C)C(=O)CNC(=O)CC(C)(C)C	True	200.28	0.63	1	2	3	49.41	0.726	No	0	Yes	2.15
CS(=O)(=O)N1C=CC=C(C2=C3C=CC=CC3=CC=CC=CN=C21)COC	True	368.46	3.68	0	4	3	59.5	0.829	No	0	Yes	3.24
C#CC1COC[C@]OC=C2C(=O)OC[C@]2C=C(C)C[C@@H1](OC(=O)C3=CC=CC=C3)[C@](O)C[C@H1](OC(=O)NOC4C[N+1](C)CC4)[C@](O)C(=O)C(OC)=C1[C@H1](COC(=O)C5=CC=CC=C5)[C@H1](OC(=O)C6=CC=CC=C6O)[C@H1]OC	True	1063.07	5.35	4	20	15	273.34	0.049	No	3	No	7.1
CS(=O)(=O)NC/C=C/C(=O)NC1=CC=CC=C1OCCCOCC=CNCCCNC(=O)C=CCNC(=O)NCN=CNN([C@H1]O[C@@H1]2CO[C@@H1](CCO[C@@H1]3O[C@H1](CO)[C@H1](O)[C@H1](O)[C@H1]3O[C@H1]O)[C@H1]2O[C@@H1])C[C@@H1]C[C@@H1]CC=CC=CC=CC=C	True	1172.37	1.5	11	20	44	339.92	0.011	No	3	No	7.11
C1COC=C2C(O)=C(CC=C(C)C)C(O)=C2CCC1=O	True	276.33	3.63	2	4	2	66.76	0.756	No	0	Yes	4.07
O1[C@]C(O)=C[C@@H1]1[C@@](C)C=C2C=CC[C@@H1](O)C[C@@H1]2[C@](CC/C=C(\C)C)OC=O	True	372.46	4.17	2	5	8	75.99	0.494	No	0	Yes	5.65
C1CC23[C@@H1][C@H1](C)O[C@@]2(O1)[C@H1](O)C(=O)[C@@H1][C@@H1]3C	True	224.26	0.5	1	4	0	55.76	0.651	No	0	Yes	5.6
N1C(=O)[C@H1]C2CCC[C@]12COC(N)=O	True	197.21	-0.05	2	3	2	81.42	0.651	No	0	Yes	4.56
C1NCC1	True	57.1	-0.02	1	1	0	12.03	0.412	No	0	Yes	1.73
C1=2C=CC=C(CC)N(CC3=CC=C(OC)C=C3C(=O)O)N=C1C=2	True	310.35	3.31	1	4	5	64.35	0.785	No	0	Yes	2.26
C1CC(=O)O[C@@H1]2[C@@H1](O)[C@H1](OCC3=CC=CC=C3)O[C@H1]2OC(=O)C4=CC=CC=C4[C@@]1(C)OCCC5=CC=CC=C5	True	532.59	4.28	1	8	7	100.52	0.45	No	1	No	4.55
C12[C@H1]OC(=O)C[C@](O)CC(=O)[C@@H1](O)[C@@H1](CO)[C@@H1](O)CC/C(C)=C/[C@@H1](C)[C@@H1](O)C[C@@H1](OC(=O)CC(C)C)[C@](C)C(=O)O[C@H1](CC1)OO[C@H1]2C	True	685.78	2.57	5	14	4	215.58	0.124	No	2	No	7.13
CCN(C(=O)C1=CC=CC=C1C(F)(F)F)[C@H1](C)COC	True	289.3	3.2	0	2	5	29.54	0.833	No	0	Yes	2.65
OC(=O)/C(=C/C=C/C=C\C=C\C=C\C=C(Cl)Cl)CCl	True	319.62	4.78	1	1	7	37.3	0.416	No	0	Yes	3.78
C1CC(=O)NC[C@@H1]2O[C@@](C)CCOC2[C@H1]1[C@@H1](C)O	True	256.32	0.62	2	4	1	67.79	0.721	No	0	Yes	4.61
C1C2NC(C3CC3)=NC(C4=CC=CC=C4Cl)=C12	True	244.73	3.24	1	2	2	24.39	0.849	No	0	Yes	3.44
C=12COC3=CC=C(NC=NC=CC(Cl)=CC=1)C3=C2	True	258.71	2.92	1	3	0	33.62	0.725	No	0	Yes	5.66
C12C(C)C=CCC(O)=C(O)C(=O)C(C)=C(OC(=O)CCC(C)(C)C(=O)NC(CCCCC(=O)O)C(=O)OCC3=CC=CC=C3C1)O2	True	641.71	4.87	4	10	5	185.76	0.195	No	1	No	5.84
O1C(=O)C2=CC=CC=C2[C@@]1(O)C#CC3=CC=CC=C3[N+1](=O)[O-1]	True	295.25	1.96	1	5	1	89.67	0.376	No	0	Yes	3.23
C1C=NN=C([C@@H1](CC(F)F)C2=CC=CC=C2)N1C3=CC=CC=C3	True	313.35	4.33	0	3	5	27.96	0.807	No	0	Yes	3.34
C1=CC(=O)[C@](C)[C@H1]1OO	True	127.12	0.58	1	3	1	46.53	0.414	No	0	Yes	4.41
O1C[C@@H1][C@@H1]2C3=CC4[C@@H1]CCC[C@]4(O)[C@@H1]3CC[C@@]2(C)[C@]1(C)C=O	True	302.41	2.89	1	3	1	46.53	0.598	No	0	Yes	5.71
CN(CCC(=O)OC)CCNC(=O)CN1C=[N+1](C)C2=CC=CC=C21	True	333.41	0.08	1	5	8	67.45	0.549	No	0	Yes	2.66
C=1C(C)C[C@@](C2)CCOC(C)(C)[C@@H1]2[C@@H1]=1	True	193.31	3.36	0	1	0	9.23	0.536	No	0	Yes	5.21
OC(C(=O)/C=C/[C@@H1](O)C(=O)OCC)O[C@@H1](O)[C@H1]OC(C)=O	True	305.26	-1.59	3	9	9	139.59	0.261	No	0	Yes	4.75
CS(=O)(=O)[C@@H1](CC1=CC=CC=C1)C(=O)CS2C=NC3SN=C(C(=O)[NH1]3)C2C4=CC=CC=C4	True	489.64	2.5	2	7	7	105.03	0.459	No	0	Yes	5.62
O1C(CCC2=CC=CC(NC(=O)OCCC)=C2)O[C@@H1]O[C@](C)C3CC4C(OCC=CN4C3=O)[C@H1]1O	True	488.54	3.09	2	8	6	115.79	0.628	No	0	Yes	6.08
C1OC=C2C(C3=CN=CN=C3OC4=CC=CC(F)=C4)=C12	True	268.25	3.09	0	4	3	44.24	0.858	No	0	Yes	3.11
C=1C(NC(=O)/C=C\C=C/C2=C(C)C=C(O)C(Cl)=C2)C=CC=1C(C)(C)O	True	359.85	3.68	3	3	5	69.56	0.555	No	0	Yes	3.9
N1S(=O)(=O)C=CC(C2=CC=CC=3[NH1]C=CC2=3)=C4C(=O)N=CN=C14	True	326.34	1.34	2	4	1	103.75	0.826	No	0	Yes	3.62
CC(O)CCCCCCCCC(=O)N[C@@H1](CCC(C)C)C(=O)OC(C)(C)C	True	385.59	4.75	2	4	14	75.63	0.334	No	0	Yes	3.02
C1C(O)CCCC/C=C\[C@@H1]C2C[C@H1]C3C[C@@H1](NC4CCC4)CC[C@]3(C)C2(C)CC1	True	399.66	6.4	2	2	2	32.26	0.563	No	1	No	5.26
OC[C@H1](CNC(=O)N1CCN(CCCC2(O)CC2)CO1)C3=CC=CC=C3	True	363.46	1.28	3	5	8	85.27	0.648	No	0	Yes	3.49
CC=CC(C(=O)NC1=CC=C(OC)C=C1C)=O	True	233.27	2.09	1	3	4	55.4	0.64	No	0	Yes	2.21
CNC(=O)C1(C)CCN1C	True	142.2	-0.17	1	2	1	32.34	0.551	No	0	Yes	3.62
O1C[C@H1]CC=C(C[C@@]1(S)CO)C(=O)O	True	217.27	0.63	3	4	2	66.76	0.593	No	0	Yes	4.79
C1CC2CCCCCC=CCC2(CO[C@@H1]O[C@H1](CO)[C@@H1](O)[C@H1](O)C)OO1	True	373.47	1.86	3	7	8	97.61	0.339	No	0	Yes	5.52
C1N(C2=NCCCN2)CC[C@H1]1C=3C=CSC=3	True	235.36	1.89	1	4	1	27.63	0.805	No	0	Yes	3.41
C1CCCCCCC=CC=C(OCCO2)C(OC)=CC=CC1=C2	True	316.44	5.19	0	3	1	27.69	0.666	No	1	No	4.46
OC(CNC(=O)NC1CCCC2=CC=CC=C21)O[C@H1](CO)C(=O)O	True	338.36	0.14	5	5	7	128.12	0.45	No	0	Yes	3.58
C1CCNC(=O)C=CC=C(CN(C)CCCNS(C)(=O)=O)C2=CC=C(C=C2O)CC[C@@H1](C)C3=CC=CC=C3[C@](C)(N[C@@H1]4)COC[C@H1]OC[C@@]4CN1C(=O)OC	True	781.01	4.28	4	10	7	158.77	0.299	No	1	No	6.53
O1CCNC(=O)NC2=NC3=CC=CC=C3C=[N+1]12	True	231.24	0.09	2	3	0	67.13	0.631	No	0	Yes	3.61
C12=CCNC=CC=C(NCC(C=3C=CSC=3)OC=O)CCC[C@H1]1N(C)C2	True	373.52	2.96	2	6	6	53.6	0.593	No	0	Yes	5.01
C1CCC/C=C\CCCCCCC(=O)NCCCCCC(=O)NCCCC[C@@H1](O)C(=O)NC2CCCC2[C@@H1]OC(OC)[C@@H1](O)[C@H1]1OC(=O)CCCCN	True	752.03	4.62	6	10	6	198.54	0.127	No	2	No	5.5
C1CCCCCCCC(=O)O[C@@H1][C@H1]2O[C@]2(CCC=C(C)C)[C@@H1]1OC(=O)CCC3=CC4=CC(=C3)C(CCOC)C4=O	True	553.72	6.57	0	7	10	91.43	0.184	No	2	No	5.87
C12C(O)C(=O)NC[C@H1]O[C@@H1]C(C)(C)C3[C@]1=CC4[C@@]5OC[C@@](C)(CC[C@@H1]35)[C@@H1]4O[C@]2O	True	403.48	1.87	3	6	0	97.25	0.535	No	0	Yes	7.55
C1C(O)CO[C@H1]1C[C@H1]2O[C@@H1]2[C@@H1](O)[C@@H1](C)C(=O)CCC	True	272.34	0.66	2	5	7	79.29	0.666	No	0	Yes	4.65
C1C(N)CC1	True	71.12	0.5	1	1	0	26.02	0.442	No	0	Yes	1.8
NC(=O)NC=C1C=C(C#CC2=CC=C(C(=O)NS(=O)(=O)C3=CC=C(O)C=C3O)C=C2CS(=O)(=O)C4=CC=C(F)C=C4)OCC5=CC=CN=C15	True	704.71	3.2	5	10	7	215.08	0.14	No	1	No	3.67
N=1S(=O)(=O)C=CC(CC2=CC=C([S+1](C(F)F)NC3=CC=CC=N3)C=C2CC)(OC)C=1	True	454.54	3.73	1	5	8	80.65	0.615	No	0	Yes	4.89
O1C[C@H1]C2CC3=CC(=O)C=CC3=CC[C@]12	True	200.24	2.15	0	2	0	26.3	0.599	No	0	Yes	4.67
C=1CNC(C)(C)C2=CC=CN=C2[C@@]=1C(=O)N[N+1](=O)[O-1]	True	262.27	0.61	2	5	2	97.16	0.601	No	0	Yes	3.55
O1C(C2=CC=C(Cl)C(C3=CC=CN=C3)=C2)[C@H1](O)C[C@@H1]1O	True	291.73	2.54	2	4	2	62.58	0.892	No	0	Yes	3.43
N1S(=O)(=O)C=CC(NC(=O)CCCCC2=C3C=CC=CC3=CC4=CC=CC=C24)=CC=C1Cl	True	466.99	5.23	2	3	6	75.27	0.296	No	1	No	3.08
CCN1C=CC(C2[C@H1](O)C(C)(C)C(=O)OC)=CC(OC)=C2OC1	True	323.39	1.78	1	6	5	68.23	0.778	No	0	Yes	5.28
O/N=C(\C1=NC=CC=N1)C2CCCCC2	True	205.26	2.24	1	4	2	58.37	0.457	No	0	Yes	2.67
O1C[C@@H1]CS(=O)(=O)[C@@H1]([C@@H1](OC)/C(C)=C/[C@@H1](C)C(=O)C2=CC=C(O)C(OC)=C2)NC(=O)[C@H1](O)C=C/C1=C\C[C@@H1]O	True	565.64	2	4	10	9	168.69	0.257	No	1	No	5.85
COC(=O)[C@H1](C)[C@H1]CC[C@](C)[C@@H1]([C@H1](C)CC[C@@H1](O)C(C)(C)O)C[C@H1](O)C[C@]C	True	398.58	3.78	3	5	15	86.99	0.365	No	0	Yes	5.17
O1C(C2NC=[N+1](CCOC(=O)C3=CC=C(Br)S3)C=C2C=CC(=O)[O-1])N1NC(=O)CC4=CC=CS4	True	567.44	0.78	2	10	10	126.11	0.187	No	1	No	5.07
C1C=CC(C2C3=C(C4OC3=O)NC[C@](O5)[C@@H1](C2N)OC(=O)C6=CC=CC=C65)=CC(O)=C14	True	419.41	1.57	3	8	0	120.11	0.542	No	0	Yes	6.29
CCC(=O)NC[C@@H1](C)O	True	131.17	-0.11	2	2	3	49.33	0.561	No	0	Yes	2.49
CCC	True	44.1	1.42	0	0	0	0	0.385	No	0	Yes	1.75
O1C(C#CC#CC2=CC=CC(S(=O)(=O)N3CCCCC3)=C2O1)=N	True	330.37	2.01	1	5	2	87.51	0.853	No	0	Yes	4.59
C1C(O)CCC(CCCCN2CCN(C)CC2)CC[C@@](C)C=CC(O)=CC(=O)C=C(O)C(O)=C(O)C=CC=C1	True	543.73	5.39	5	8	5	124.7	0.293	No	2	No	4.76
CCNC(=O)[C@H1](CCC(N)=O)CC(=O)O	True	216.24	-0.52	3	3	7	109.49	0.531	No	0	Yes	2.64
C1N(CC[C@H1]2CC[C@H1](OCC3=CC=C(Cl)C=C3)CC2CC1)C(C4=CC=C(C#N)C=C45)CCC5	True	463.07	7.08	0	3	4	36.26	0.487	No	1	No	3.6
C1CC(=O)N(CC2=CC=CC=C2)[C@@H1]1O	True	191.23	1.13	1	2	2	40.54	0.761	No	0	Yes	2.51
O/N=C(\CCCC1=CC=CC=C1)CC2=CC=CC=C2C	True	267.37	4.39	1	2	6	32.59	0.47	No	0	Yes	2.09
C1C/N=C\C=C2N(C)C(=O)N(CC2)[C@H1](CC(N)=O)C(=O)N1	True	293.33	-0.93	2	4	2	108.1	0.686	No	0	Yes	5.06
O1[C@H1]CC[C@@H1]C2[C@@](C)C3CC[C@@H1](CCOC(=O)C45CC6CC(CC(C6)C4)C5CC)[C@H1]3[C@@H1]21	True	425.63	6.18	0	3	5	35.53	0.493	No	1	No	6.54
C1OC2=CC(O)=CC(O3)=C2C[C@@H1]1[C@H1](O)C4=CC=C(OC)C=C43	True	300.31	2.79	2	5	1	68.15	0.847	No	0	Yes	4.17
C1=C(OCC(C)CC)C(O)=CC(C)=C1OC	True	224.3	3.13	1	3	5	38.69	0.835	No	0	Yes	2.52
C1C(O)CCC[C@@H1]CC(OC(=O)C2=CC=C(O)C(OC)=C2)COC(=O)C3=CC=C[N+1](C)=C3OC(=O)[C@@H1]O[C@@H1]C(O)C=C1OCCC(NC(=O)OCCOCCNC)C	True	817.89	2.38	5	16	14	230.75	0.08	No	2	No	5.86
C1CNC=NC2=C1C=CN=C2NC3CN(C)CC3N	True	260.34	-0.06	3	6	2	78.57	0.694	No	0	Yes	4.43
O1C(C2=CC=NC3=CC=CC=C23)CNC1	True	200.24	1.85	1	3	1	34.15	0.762	No	0	Yes	3.06
CC(CCO)N(CC1CCCCC1)C(=N)N	True	227.35	1.53	3	2	5	73.34	0.492	No	0	Yes	3.15
C=1C(CC)C[C@@](C=2C=COC=2)CC[C@H1]=1	True	189.28	3.97	0	1	2	13.14	0.642	No	0	Yes	3.89
C1/N=C/C2=CC=CC(=C2)O1	True	133.15	1.46	0	2	0	21.59	0.525	No	0	Yes	4.54
OCC1CC1/C=C/CC2=CC=CC=C2	True	188.27	2.41	1	1	4	20.23	0.719	No	0	Yes	3.22
C1N=C(OC)NC1=O	True	114.1	-0.88	1	3	0	50.69	0.444	No	0	Yes	3.66
CC(O1)[C@H1]C23[C@H1]C=C(C[C@]2(C)[C@@](C)(O)[C@H1]3[C@H1](C)[C@@H1]1)Br	True	326.25	3.67	1	2	0	29.46	0.736	No	0	Yes	6.39
FC1=CC=CC=C(OC2[C@@H1]CCCO2)C3=C1OC=CCCC3C(=O)C[C@@](C)O	True	388.44	4.73	1	5	5	64.99	0.738	No	0	Yes	5.03
C1C(O)CC[C@](C)[C@@H1]1CC=C[C@H1]2[C@@H1](O)C(=O)N(C)CCC[C@H1](C)/C(=N/OCC3=CC=CC=C3Cl)CC[C@]24[C@@]5(CCO[C@H1]4CC=CC5C)O[C@]	True	695.34	7.23	2	7	7	100.82	0.231	No	2	No	7.44
OC/C=C\CCC/C=C\CCCC(=O)O	True	212.29	2.52	2	2	9	57.53	0.456	No	0	Yes	2.58
C1C(N2C=C(F)C(=O)C(F)=C2F)CCC1	True	217.19	2.38	0	2	1	22	0.662	No	0	Yes	2.86
O1C(CC=C2C=CC=C(C2=C1)CCCCO)OCOC(N)C	True	307.39	0.56	2	5	8	73.94	0.542	No	0	Yes	4.24
C=1C[C@](CO)[C@H1](C(C)(C)O)[C@@]=1O	True	171.22	0.79	3	3	2	60.69	0.575	No	0	Yes	4.51
C1OC(=O)C=CC=C(C2=CC=CC=C2)OCOCO[C@H1](CO)[C@H1]1	True	319.33	1.67	1	6	2	74.22	0.836	No	0	Yes	4.25
CC1(CC[C@H1](O)CO)OOC(CO2)CNC12	True	233.26	-0.85	3	6	4	80.18	0.549	No	0	Yes	5.8
C1CCN1C(=O)NC2=CC=CC=C2	True	176.22	1.92	1	1	1	32.34	0.696	No	0	Yes	1.37
C1SC=NC2=NC=C1C3N2CC(=O)NCC4=CC(Cl)=CC=C4OCC5=CC=CC(=C5)O3	True	454.94	3.58	1	7	0	75.52	0.658	No	0	Yes	5.72
C1CN(C(=O)CC2=CC=CC(NS(C)(=O)=O)=C2)C1	True	268.34	0.83	1	3	4	66.48	0.879	No	0	Yes	1.84
C1C2=CC=CC=C2CCCC1=O	True	160.22	2.13	0	1	0	17.07	0.531	No	0	Yes	1.95
CNC(=O)[C@H1](CC1=CC=C(OCC#C)C(F)=C1F)NC(=O)CC(C(=O)NCCO)CP(=O)(O)O	True	505.41	-0.96	6	6	13	174.29	0.147	No	2	No	3.81
C1/N=C/SC(C=N[NH1]C=NC2=C(N)C=CC=C2)NC1	True	276.37	1.19	3	6	4	87.16	0.334	No	0	Yes	4.53
O/N=C1\CN2CCC1CC2	True	140.19	0.54	1	3	0	35.83	0.394	No	0	Yes	3.78
O1[C@]C2=CC(O)C(O)CC[C@]2(C)C1OC(=O)C3=CC=CC=C3	True	302.33	1.69	2	5	2	75.99	0.813	No	0	Yes	4.39
C1OC=CC2=C([C@@]3(C)CC[C@H1](C)C(OC)[C@H1]3CC)C[C@H1](OCCCC)[C@H1](CN1CC4)CC=C(C=C4O)CC=CC2	True	553.83	8.27	1	5	7	51.16	0.254	No	2	No	7.06
CC[C@@H1]CC[C@H1]C[C@H1](OC=1C=CSC=1CCCB(O)OCC)F	True	342.29	4.86	1	4	14	38.69	0.388	No	0	Yes	4.88
COC1=CC=C(OC)C=C1C=CC(=O)CO[C@@H1]2C[C@H1](CO)[C@@H1](O)[C@@H1]2O	True	352.38	0.41	3	7	8	105.45	0.582	No	0	Yes	3.71
C12CNC(C=C3C(=O)CCC[C@]31C)C2(C)C	True	219.33	2.3	1	2	0	29.1	0.677	No	0	Yes	5.22
CCC(=O)N1CCN(CC[N+1]2=CC=C(C3=CC=CS3)C=C2)CC1	True	330.48	2.26	0	3	5	27.43	0.787	No	0	Yes	2.54
C1N2N=CC=C2C3NN=C(C4=CC=CC=C4)C=C13	True	236.28	1.87	1	4	1	42.21	0.821	No	0	Yes	3.85
C1C(CCN2CCCC2)[C@@H1](CCN3CCNCC3)CCCOCC4=CC=C(O)C1=C4	True	415.62	3.26	2	5	6	47.97	0.747	No	0	Yes	4.73
COC(=O)[C@H1](O)[C@@H1](C)C(=O)C(C)C(Br)C(=O)C1(O)C(C)C(Br)C(C)C1CCC	True	528.28	2.89	2	6	9	100.9	0.353	No	1	No	5.18
C/C(=N/OCC1=CC=C(SC)C=C1Cl)C(=O)O	True	273.74	3.04	1	4	5	58.89	0.509	No	0	Yes	2.62
C1CC[C@H1]1/C=C/C=[N+1](C)C=CC=C(O)C(C2=CC=CC=C2Br)=C	True	373.31	5.49	1	1	6	23.24	0.303	No	1	No	3.77
C1CC2=CC(Br)=C(O)C(OC)=C2NC1=O	True	272.1	2.05	2	3	1	58.56	0.822	No	0	Yes	2.78
C1C(O)COC2=CC=C(OC)C=C2C3=CC=C(C=C3)[C@@H1](CC(=O)OC4=CC=CS4)C[C@@H1](NC(C)=O)CC1	True	523.65	5.32	2	7	5	94.09	0.44	No	2	No	4.99
C1OC2=CC(OC)=CC=C2C1=O	True	164.16	1.27	0	3	1	35.53	0.627	No	0	Yes	2
C1C(C2=CC=CC=C2)C[C@@H1]1C3CC3	True	172.27	3.59	0	0	2	0	0.639	No	0	Yes	1.81
C1OC(=O)C=CN1CCO	True	143.14	-0.69	1	4	2	49.77	0.52	No	0	Yes	3.62
CN(C/C(=N\OC)C(C)CC)C=O	True	186.25	1.12	0	3	6	41.9	0.354	No	0	Yes	3.93
O1C(=O)C=C2C=C(NC(=O)[C@H1](N)[C@@H1](O)[C@H1](O)[C@H1]1N3C(=O)[C@@H1]2)C(=C3)C(=O)C4=CC=CC=C4	True	424.39	-1.33	4	8	2	159.26	0.336	No	0	Yes	6.06
CCCCCCCCCCCCOP(=O)([O-1])OCC[N+1](C)(C)CCCOCCCC	True	451.63	5.69	0	5	23	67.82	0.113	No	1	No	3.5
NC(=O)C1=CC(F)=CC(=C1)O[C@@](O)=C[C@H1](C(=O)N[C@H1](CO)C(=O)O)C[C@](C)(O)[C@@H1](O)[C@H1]O	True	459.4	-1.08	8	9	12	219.87	0.177	No	1	No	4.53
C1OC(=O)[C@](C)[C@H1]1OC(=O)[C@H1](C)[C@H1](C)OC=O	True	243.23	0.25	0	6	5	78.9	0.391	No	0	Yes	4.4
C1CC(=O)NN=C(C2=CC=CC(OCC)=C2OCC=C)NCCCNC1	True	360.46	1.79	3	6	6	83.98	0.674	No	0	Yes	3.36
C/C(=C\C=C/C[C@@H1](C)C(=O)/C=C/C(=O)C[O-1])CCC(O)C(C)C(C/C=C(\C)CC[C@@]C(C)(O1)[C@@](O)C(C)(C)C=O)[C@H1]1O	True	586.77	4.4	3	8	15	144.19	0.111	No	1	No	6.38
C123C(C)(C)[C@H1]CC[C@](C)C=C[C@@H1]3C(CC)[C@H1](OC(=O)CC(C)(C)C)[C@H1](O)C1[C@]2	True	386.58	5.22	1	3	3	46.53	0.676	No	1	No	6.45
C1CN([C@@H1](C)C(=O)OCC)C[C@H1]1C(=O)OC	True	229.28	0.43	0	5	4	55.84	0.654	No	0	Yes	2.8
O1C(CCNCCC2=CC=CC=C2)CC[C@](C)C3(O[C@H1]C[C@H1](OO)C(=O)C4=COC(=C4)CO[C@@H1])[C@H1](O)[C@H1]13	True	513.59	3.55	3	9	15	119.62	0.142	No	1	No	5.21
C1C(NC(=O)C2=CC=C(S2)CCC)C[C@@H1]1C3=CC=C(F)C=C3	True	317.43	4.52	1	2	5	29.1	0.863	No	0	Yes	2.19
C1OC2=CC=CC=C2/C1=N\O	True	149.15	1.26	1	3	0	41.82	0.445	No	0	Yes	2.35
CN(C1CCN(CCCC2=CC=CC=C2)CC1)C(C)(C)C	True	288.48	3.81	0	2	5	6.48	0.813	No	0	Yes	2.11
O1CCN2CC3=C(C=C(Br)C=C3[C@H1]2NC(=O)C4=CC=C(O)C(CC(=O)O)=C4)[C@H1]1O	True	463.28	2.05	4	6	4	119.33	0.548	No	0	Yes	4.7
N#C/C(=O)C(C)O	True	99.09	-0.54	1	3	1	61.09	0.449	No	0	Yes	3.78
C1CCCOC2=CC(O)=C(SCC3=CC=C(O)C=C3)C(OC)=C2O1	True	348.42	3.95	2	6	4	68.15	0.816	No	0	Yes	2.58
O1[C@]2CC(Cl)(Cl)CC[C@@]21	True	165.02	2.44	0	1	0	12.53	0.396	No	0	Yes	4.89
C1C2=NC3=CC=CC=C3N2C[C@@]1(C#N)C4=CC=CC=C4	True	259.31	3.05	0	3	1	41.61	0.674	No	0	Yes	3.05
O/N=C(\CCC=C(C=1)C=COC=1C)C/C=C(\C)CCC(=O)/C=C(C)/C=C(O)\C=C\C=C\C2CCC(OC)C3[C@H1][C@H1]4OC(C)(C)O[C@@H1]4C[C@]5C(=O)O[C@@](C=CC[C@H1](C)[C@](C)(O)C=O)O[C@]5(C)[C@H1]3OC(=O)[C@H1]2	True	970.17	9.37	3	15	19	205.94	0.013	No	3	No	7.7
C1S(=O)(=O)CC=C2C=C(NCCCOCCN3CCCC3)C=C1NC(=O)CNC(=O)C(CCN=C(N)N)C2	True	551.71	-0.88	5	8	11	181.24	0.124	No	1	No	5.44
CC/N=C(\N)N1C[C@@H1]2CCCN2[C@H1]1[C@H1](O)[C@@H1](CC3=CC=CC=C3)NC(=O)OCC4=CC=CC=C4	True	465.6	2.33	3	5	8	103.42	0.408	No	0	Yes	3.87
CC(OC1=CC[C@H1]CC1C)C2=CC=C(O)C(OC)=C2OC	True	291.37	4.01	1	4	5	47.92	0.89	No	0	Yes	4.1
C12CN(CC=C(COC3=CC=CC=C3)N(O)[C@@H1]CC(C)=CCOCC[C@]C)C4C[C@H1]5[C@H1](C1)[C@H1](O4)C(O)=C25	True	507.65	5.16	2	7	14	74.63	0.205	No	2	No	6.66
C=1CC(C2)(C)C=CN=C(NC3=CC(Cl)=C(N)C=C3/C=N)/OC(=O)[C@]=12	True	344.8	3.48	3	6	2	100.56	0.434	No	0	Yes	5.71
C1C2=CC(O)=CC=C2N1C	True	135.17	1.34	1	2	0	23.47	0.58	No	0	Yes	2.23
C1COC(=O)[C@@H1](C2=CC=CC=C2)[C@H1]1C3=CC=CC=C3	True	252.31	3.5	0	2	2	26.3	0.765	No	0	Yes	2.69
CC(CCCCCC(C)F)F	True	164.24	3.65	0	0	6	0	0.525	No	0	Yes	3.21
O1C[C@H1]O[C@@](O)(C2OCC(O)C(O)C(C)C2)[C@H1](OC(C)=O)[C@@H1]1OC(C)=O	True	377.37	-1.15	3	10	3	140.98	0.516	No	0	Yes	5.1
N=1C=NC2=CC=CC=C2[C@H1]=1	True	130.15	1.63	0	2	0	25.78	0.541	No	0	Yes	1.77
O1/N=C/NC[C@@H1]2CCCC[C@H1]2[C@H1](CC3)C(=O)O[C@H1](COC)C(=O)C[C@@H1](OC1)[C@](C)C=CN([C@H1]4C[C@H1](O)[C@H1](O)[C@H1]4OCC5=CC=C(I)C=C5)O3	True	798.69	3.26	3	13	6	157.61	0.286	No	2	No	6.98
CC(O)[C@@H1](OC(C)=O)C(=O)[C@H1]1[C@@](C)(CO)C[C@@H1]1O	True	260.29	-0.75	3	6	5	104.06	0.562	No	0	Yes	4.5
CCC(=O)O[C@@H1](OC1[C@H1]2O[C@@H1](OC(=O)/C=C/C3=CC=C(O)C=C3)C[C@H1]2OC(C)C[C@@H1]OC(=O)CCCCCCCCCCC)[C@@H1](O[C@H1]4O[C@H1](CO)[C@@H1](O)[C@H1](O)[C@H1]4O)[C@H1]1O	True	839.95	3.08	6	17	24	246.43	0.038	No	3	No	5.68
C123CN(S(=O)(=O)NC(C)(C)C)C[C@H1]1C=CC=CC4=CC=CC2=C34	True	330.45	2.43	1	2	2	49.41	0.905	No	0	Yes	4.67
C1CC(=O)NC=C2C=C(C[C@@H1](C)[C@H1](CC(C)C)C=O)ON=CN(CC(=O)O)C1=C2C	True	417.51	3.19	2	6	8	108.3	0.587	No	0	Yes	5.94
C1CN(C(=O)C2=CC=NN2C3=CC=CC=C3OCC)CCC1	True	299.37	2.9	0	4	4	47.36	0.872	No	0	Yes	2.12
CSCON=C(C(=O)OCCBr)O[C@@](OCC=C)C1=CC=CC=C1C=CNC	True	472.38	3.52	1	8	12	78.38	0.073	No	0	Yes	3.89
[3H]C([3H])([3H])C([3H])([3H])C=CC=C(N(C)C(=O)[C@H1](C1)NC(=O)C=C2C(O3)=CC(OCCCCCC(C)C)=C2CC[C@]31CO)C=CC4CCN(CC(=O)O)C4	True	661.89	5	3	7	17	128.64	0.147	No	1	No	7.48
N1C(=O)C(F)(F)CCCC[C@@]2CC[C@H1](C(C)C)[C@@]21	True	257.32	3.48	1	1	1	29.1	0.765	No	0	Yes	4.52
O1C/C=C\COCCNC=CC(=O)C(C(=O)O[C@@H1](C)CCC[C@@H1](O)CC)=C2SC(CCCCC)C(=O)[C@]12OCOCCCNCCN(C)[C@](C)CC[C@H1]C(C)(C)[C@@H1]O[C@@H1]3OC[C@@H1](OC(=O)C4=CC=C(O)C=C4)[C@H1]3OC(C)=O	True	1101.39	7.21	4	20	32	236.18	0.014	No	3	No	6.97
O1C[C@H1]C[C@@H1](O)[C@@H1][C@H1](CCO[C@](CC2)C(O)CC2=O)OC(=O)CCCC(=O)O[C@@]1(C)[C@H1]C(=O)O	True	484.5	0.86	3	10	6	165.89	0.458	No	0	Yes	5.88
