# Supplementary material for: Data-driven design and screening of novel Klebsiella pneumoniae carbapenemase-2 β-lactamase inhibitors using a generative CLM
Source: RSC Adv. 2026 May 26;16(31):28845–56. doi: 10.1039/d6ra02379g (PMC13213580; doi:10.1039/d6ra02379g)
Supplement: RA-016-D6RA02379G-s004 [file RA-016-D6RA02379G-s004.xlsx]

## Sheet: swissadme
Molecule	Canonical SMILES	Formula	MW	#Heavy atoms	#Aromatic heavy atoms	Fraction Csp3	#Rotatable bonds	#H-bond acceptors	#H-bond donors	MR	TPSA	iLOGP	XLOGP3	WLOGP	MLOGP	Silicos-IT Log P	Consensus Log P	ESOL Log S	ESOL Solubility (mg/ml)	ESOL Solubility (mol/l)	ESOL Class	Ali Log S	Ali Solubility (mg/ml)	Ali Solubility (mol/l)	Ali Class	Silicos-IT LogSw	Silicos-IT Solubility (mg/ml)	Silicos-IT Solubility (mol/l)	Silicos-IT class	GI absorption	BBB permeant	Pgp substrate	CYP1A2 inhibitor	CYP2C19 inhibitor	CYP2C9 inhibitor	CYP2D6 inhibitor	CYP3A4 inhibitor	log Kp (cm/s)	Lipinski #violations	Ghose #violations	Veber #violations	Egan #violations	Muegge #violations	Bioavailability Score	PAINS #alerts	Brenk #alerts	Leadlikeness #violations	Synthetic Accessibility
Molecule 1	C=CCO[C](c1ccccc1C=CNC)OC(=NOCSC)C(=O)OCCBr	C19H24BrN2O5S	472.37	28	6	0.37	15	6	1	114.41	103.68	0	5.02	3.13	2.83	4.25	3.05	-5.1	0.00375	7.95e-06	Moderately soluble	-6.94	5.45e-05	1.15e-07	Poorly soluble	-5.25	0.00269	5.69e-06	Moderately soluble	High	No	Yes	No	Yes	No	No	No	-5.62	0	0	1	0	1	0.55	0	6	3	4.45
Molecule 2	Oc1ccc2c(c1)CO[C@@H](O[CH]2)c1c(O)ccc(c1O)Cl	C15H12ClO5	307.71	21	12	0.2	1	5	3	75.75	79.15	0	2.19	2.45	1.71	2.61	1.79	-3.48	0.101	0.000328	Soluble	-3.49	0.101	0.000327	Soluble	-3.87	0.0414	0.000135	Soluble	High	No	Yes	No	No	No	No	Yes	-6.62	0	0	0	0	0	0.55	0	0	0	3.39
Molecule 3	CN(Cc1ccccc1)CC[P+](C)(C)C	C13H23NP+	224.3	15	6	0.54	5	1	0	72.18	16.83	3.39	1.48	2.87	3.34	2.6	2.73	-2.13	1.67	0.00743	Soluble	-1.44	8.14	0.0363	Very soluble	-4.62	0.00541	2.41e-05	Moderately soluble	High	Yes	No	No	No	No	Yes	No	-6.62	0	0	0	0	0	0.55	0	1	1	2.27
Molecule 4	CN(C(C)(C)C)C1CCN(CC1)CCCc1ccccc1	C19H32N2	288.47	21	6	0.68	6	2	0	96.72	6.48	3.91	4.15	3.43	3.5	3.63	3.73	-4.06	0.0252	8.74e-05	Moderately soluble	-3.99	0.0293	0.000101	Soluble	-5.03	0.00267	9.27e-06	Moderately soluble	High	Yes	No	No	No	No	Yes	No	-5.11	0	0	0	0	0	0.55	0	0	1	2.05
Molecule 5	Clc1cccc(c1)Oc1ccc(c(c1)C)N(C)C	C15H16ClNO	261.75	18	12	0.2	3	1	0	77.14	12.47	3.34	4.48	4.51	3.99	3.77	4.02	-4.58	0.00688	2.63e-05	Moderately soluble	-4.46	0.00903	3.45e-05	Moderately soluble	-5.77	0.000442	1.69e-06	Moderately soluble	High	Yes	No	Yes	Yes	Yes	Yes	No	-4.72	0	0	0	0	0	0.55	0	0	1	2.02
Molecule 6	CCCCCCC1=CC(=O)c2c1cccc2	C15H18O	214.3	16	6	0.4	5	1	0	68.65	17.07	2.93	4.45	4.24	3.29	4.58	3.9	-3.92	0.0258	0.00012	Soluble	-4.53	0.00636	2.97e-05	Moderately soluble	-5.29	0.00111	5.19e-06	Moderately soluble	High	Yes	No	Yes	Yes	No	Yes	No	-4.45	0	0	0	0	1	0.55	0	0	2	2.98
Molecule 7	C=C[C@@H](CC1OCCOC1C)C	C10H18O2	170.25	12	0	0.8	3	2	0	49.77	18.46	2.73	2	2	1.38	2.44	2.11	-1.96	1.88	0.011	Very soluble	-2.01	1.65	0.00968	Soluble	-1.68	3.58	0.021	Soluble	High	Yes	No	No	No	No	No	No	-5.92	0	0	0	0	1	0.55	0	1	1	3.49
Molecule 8	CC(=CCCOC(=O)[C@H](O)C)C	C9H16O3	172.22	12	0	0.67	5	3	1	47.35	46.53	2.5	1.83	1.27	1.29	1.31	1.64	-1.73	3.2	0.0186	Very soluble	-2.43	0.644	0.00374	Soluble	-1.1	13.7	0.0796	Soluble	High	Yes	No	No	No	No	No	No	-6.05	0	0	0	0	1	0.55	0	1	1	2.84
Molecule 9	CCC(=O)N1CCN(CC1)CC[n+]1ccc(cc1)c1cccs1	C18H24N3OS+	330.47	23	11	0.44	6	2	0	103.51	55.67	-0.44	2.04	1.5	1.64	3.34	1.62	-3.13	0.244	0.000738	Soluble	-2.84	0.481	0.00145	Soluble	-4.29	0.0168	5.08e-05	Moderately soluble	High	Yes	Yes	No	No	No	Yes	No	-6.87	0	0	0	0	0	0.55	0	1	0	2.74
Molecule 10	CCCC1=c2ccc(cc2=CC1)C(=O)NCc1ccc(cc1)I	C20H20INO	417.28	23	12	0.25	6	1	1	104.05	29.1	3.92	4.29	3.2	4.62	5.93	4.39	-5.12	0.00317	7.59e-06	Moderately soluble	-4.61	0.0101	2.43e-05	Moderately soluble	-7.95	4.65e-06	1.11e-08	Poorly soluble	High	Yes	No	No	Yes	Yes	Yes	Yes	-5.8	1	0	0	0	0	0.55	0	1	2	3.2
Molecule 11	CCNC(=O)[C@@H](N(CC(C)(C)C)C)C(C)C	C13H28N2O	228.37	16	0	0.92	7	2	1	70.24	32.34	2.94	3.07	2.12	2.14	1.93	2.44	-2.73	0.427	0.00187	Soluble	-3.42	0.0876	0.000384	Soluble	-2.89	0.294	0.00129	Soluble	High	Yes	No	No	No	No	No	No	-5.51	0	0	0	0	0	0.55	0	0	1	2.32
Molecule 12	CN(CCCCNC(=O)C=CC(C)(C)C)C	C13H26N2O	226.36	16	0	0.77	8	2	1	69.77	32.34	3.15	2.42	2.05	2.03	2.09	2.35	-2.24	1.3	0.00575	Soluble	-2.74	0.41	0.00181	Soluble	-2.92	0.273	0.00121	Soluble	High	Yes	No	No	No	No	No	No	-5.96	0	0	0	0	0	0.55	0	1	2	2.57
Molecule 13	O/N=C(/Cc1ccccc1C)\CCCc1ccccc1	C18H21NO	267.37	20	12	0.28	6	2	1	84.5	32.59	2.76	4.41	4.39	4.13	5.07	4.15	-4.32	0.0127	4.74e-05	Moderately soluble	-4.81	0.00412	1.54e-05	Moderately soluble	-6.44	9.71e-05	3.63e-07	Poorly soluble	High	Yes	No	Yes	No	No	Yes	No	-4.8	0	0	0	0	0	0.55	0	3	1	2.77
Molecule 14	O=C1CCN(C1)c1ccc(cc1)c1cccnc1	C15H14N2O	238.28	18	12	0.2	2	2	0	74.52	33.2	2.11	2.15	2.15	1.58	3.01	2.2	-3.03	0.221	0.000926	Soluble	-2.48	0.79	0.00332	Soluble	-4.88	0.00312	1.31e-05	Moderately soluble	High	Yes	Yes	Yes	Yes	No	No	Yes	-6.23	0	0	0	0	0	0.55	0	0	1	1.89
Molecule 15	C1NCC(O1)c1ccnc2c1cccc2	C12H12N2O	200.24	15	10	0.25	1	3	1	62.01	34.15	2	1.32	1.15	1.32	2.38	1.63	-2.34	0.914	0.00457	Soluble	-1.64	4.61	0.023	Very soluble	-4.1	0.016	8e-05	Moderately soluble	High	Yes	Yes	No	No	No	No	No	-6.58	0	0	0	0	0	0.55	0	0	1	2.32
Molecule 16	COC(=O)CNC=C1CCCC1	C9H15NO2	169.22	12	0	0.67	4	2	1	46.88	38.33	2.48	1.63	1.21	0.9	1.52	1.55	-1.65	3.77	0.0223	Very soluble	-2.05	1.52	0.00896	Soluble	-1.82	2.53	0.015	Soluble	High	Yes	No	No	No	No	No	No	-6.17	0	0	0	0	1	0.55	0	0	1	2.55
Molecule 17	CCC(COc1cc(OC)c(cc1O)C)C	C13H20O3	224.3	16	6	0.54	5	3	1	65.64	38.69	3.17	3.56	3.13	2.33	3.13	3.07	-3.42	0.0851	0.000379	Soluble	-4.06	0.0196	8.75e-05	Moderately soluble	-3.72	0.0429	0.000191	Soluble	High	Yes	No	Yes	No	No	Yes	No	-5.14	0	0	0	0	0	0.55	0	0	2	2.53
Molecule 18	COc1ccccc1CC(N(C)C)CC(=O)OC(C)C	C16H25NO3	279.37	20	6	0.56	8	4	0	80.54	38.77	3.47	2.88	2.51	2.44	2.86	2.83	-3.08	0.232	0.000831	Soluble	-3.35	0.124	0.000443	Soluble	-4	0.0277	9.91e-05	Moderately soluble	High	Yes	No	No	No	No	Yes	No	-5.96	0	0	0	0	0	0.55	0	0	1	2.8
Molecule 19	CC(CNC1=CCN=NN1c1ccc(cc1F)F)C	C13H16F2N4	266.29	19	6	0.38	4	4	1	79.26	39.99	3.29	4.32	2.94	3.21	3.39	3.43	-4.18	0.0175	6.57e-05	Moderately soluble	-4.87	0.00356	1.34e-05	Moderately soluble	-4.25	0.0149	5.61e-05	Moderately soluble	High	Yes	No	Yes	No	Yes	No	No	-4.86	0	0	0	0	0	0.55	0	0	1	3.77
Molecule 20	CCC(/C(=N/OC)/CN(C=O)C)C	C9H18N2O2	186.25	13	0	0.78	6	3	0	53.63	41.9	2.31	1.47	1.12	1.25	1.11	1.45	-1.52	5.56	0.0299	Very soluble	-1.96	2.06	0.0111	Very soluble	-1.41	7.3	0.0392	Soluble	High	Yes	No	No	No	No	No	No	-6.39	0	0	0	0	1	0.55	0	3	1	3.14
Molecule 21	COc1cc2C(C=Cc2cc1OC)OC1OCCO1	C14H16O5	264.27	19	6	0.43	4	5	0	67.93	46.15	2.92	1.82	1.69	0.98	2.01	1.88	-2.59	0.672	0.00254	Soluble	-2.41	1.03	0.0039	Soluble	-2.61	0.653	0.00247	Soluble	High	Yes	Yes	No	Yes	No	No	No	-6.62	0	0	0	0	0	0.55	0	0	0	3.58
Molecule 22	O=CC(CCC(=O)NCc1cccc2c1cccc2)C	C17H19NO2	269.34	20	10	0.29	7	2	1	80.96	46.17	2.48	2.58	2.92	2.57	3.91	2.89	-3.04	0.244	0.000905	Soluble	-3.2	0.171	0.000634	Soluble	-5.67	0.000572	2.12e-06	Moderately soluble	High	Yes	No	Yes	Yes	No	Yes	Yes	-6.11	0	0	0	0	0	0.55	0	1	0	1.87
Molecule 23	CCC(=O)CCCCCCCC(=O)NCC(C)C	C15H29NO2	255.4	18	0	0.87	12	2	1	77.42	46.17	3.28	3.27	3.47	2.55	4.07	3.33	-2.69	0.52	0.00203	Soluble	-3.91	0.0311	0.000122	Soluble	-4.69	0.00525	2.06e-05	Moderately soluble	High	Yes	No	Yes	No	No	Yes	No	-5.54	0	0	1	0	0	0.55	0	0	1	1.91
Molecule 24	O=C/C(=C\c1ccccc1NC(=O)C)/C1CCCC1	C16H19NO2	257.33	19	6	0.38	5	2	1	77.77	46.17	2.33	2.99	3.12	2.32	3.41	2.83	-3.22	0.154	0.000599	Soluble	-3.62	0.0612	0.000238	Soluble	-3.98	0.0266	0.000104	Soluble	High	Yes	No	Yes	Yes	No	No	No	-5.75	0	0	0	0	0	0.55	0	2	0	2.67
Molecule 25	OC/C=C(/CC[C@@H](OC(=O)CC)C)\C	C11H20O3	200.27	14	0	0.73	7	3	1	56.96	46.53	2.19	2.09	2.05	1.88	2.17	2.08	-1.94	2.32	0.0116	Very soluble	-2.7	0.402	0.00201	Soluble	-1.92	2.41	0.0121	Soluble	High	Yes	No	No	No	No	No	No	-6.04	0	0	0	0	0	0.55	0	1	1	2.87
Molecule 26	CN(Cc1ccncc1)CC[CH]S(=O)(=O)C	C11H17N2O2S	241.33	16	6	0.55	6	4	0	64.04	58.65	0	0.42	1.75	0.37	1.15	0.74	-1.48	7.95	0.0329	Very soluble	-1.22	14.6	0.0604	Very soluble	-3.69	0.0497	0.000206	Soluble	High	Yes	No	No	No	No	No	No	-7.47	0	0	0	0	0	0.55	0	0	1	2
Molecule 27	OCCOCCCc1cc(C)ccc1SC/C=C(\C(=O)OC)/C	C18H26O4S	338.46	23	6	0.5	11	4	1	94.42	81.06	3.76	3.1	3.15	2.83	4.56	3.48	-3.36	0.148	0.000438	Soluble	-4.47	0.0115	3.39e-05	Moderately soluble	-5.01	0.0033	9.75e-06	Moderately soluble	High	No	No	Yes	No	No	Yes	Yes	-6.16	0	0	1	0	0	0.55	0	1	1	3.26
Molecule 28	CC(/C(=N/O)/N)C=C(C)C	C7H14N2O	142.2	10	0	0.57	2	2	2	42.41	58.61	1.71	1.57	1.34	1.45	0.4	1.29	-1.58	3.75	0.0264	Very soluble	-2.41	0.552	0.00388	Soluble	-0.31	69	0.485	Soluble	High	Yes	No	No	No	No	No	No	-6.05	0	1	0	0	1	0.55	0	5	1	3.58
Molecule 29	CSc1ccc(c(c1)Cl)CO/N=C(\C(=O)O)/C	C11H12ClNO3S	273.74	17	6	0.27	5	4	1	69.1	84.19	2.43	2.89	2.89	2.39	2.94	2.71	-3.29	0.141	0.000514	Soluble	-4.32	0.0132	4.81e-05	Moderately soluble	-3.51	0.0846	0.000309	Soluble	High	No	No	Yes	Yes	No	No	No	-5.92	0	0	0	0	0	0.56	0	2	0	2.42
Molecule 30	CCC1OCCN(C1=O)Cc1nnn(c1)Cc1ccc(cc1)Br	C16H19BrN4O2	379.25	23	11	0.44	5	4	0	93.26	60.25	3.34	1.89	1.69	1.77	2.37	2.21	-3.41	0.149	0.000393	Soluble	-2.78	0.633	0.00167	Soluble	-4.79	0.00614	1.62e-05	Moderately soluble	High	Yes	No	No	Yes	No	Yes	Yes	-7.27	0	0	0	0	0	0.55	0	0	1	3.25
Molecule 31	CCN(C(=O)CCN([11CH3])C)C=C(C=CC(=CCC(C)C)C(=O)C)O	C19H32N2O3	335.47	24	0	0.58	11	4	1	99.79	60.85	3.64	2.21	3.3	1.56	2.78	2.7	-2.59	0.87	0.00259	Soluble	-3.12	0.253	0.000754	Soluble	-2.11	2.63	0.00783	Soluble	High	Yes	No	No	No	No	Yes	Yes	-6.78	0	0	1	0	0	0.55	0	3	1	4.32
Molecule 32	COc1cc(OC)c(cc1Oc1cc(ccc1C)NC(=O)C)OC	C18H21NO5	331.36	24	12	0.28	7	5	1	91.71	66.02	3.19	2.91	3.58	1.96	3.29	2.99	-3.64	0.0767	0.000231	Soluble	-3.96	0.0366	0.00011	Soluble	-5.79	0.000542	1.64e-06	Moderately soluble	High	Yes	No	Yes	Yes	Yes	Yes	Yes	-6.26	0	0	0	0	0	0.55	0	0	0	2.63
Molecule 33	CCN1CCC2C1CN(C2=O)CC(C(=O)N)Cl	C11H18ClN3O2	259.73	17	0	0.82	4	3	1	72.29	66.64	2.02	-0.36	-1.13	0.09	0.2	0.17	-0.96	28.5	0.11	Very soluble	-0.58	68.8	0.265	Very soluble	-1.09	20.9	0.0804	Soluble	High	No	No	No	No	No	No	No	-8.14	0	1	0	0	0	0.55	0	1	0	3.16
Molecule 34	CC1CC=Nc2c1nc([nH]2)N	C7H10N4	150.18	11	5	0.43	0	2	2	47.99	67.06	0.61	-0.18	0.83	0.6	1.48	0.67	-0.99	15.2	0.101	Very soluble	-0.77	25.3	0.169	Very soluble	-1.66	3.3	0.022	Soluble	High	No	No	No	No	No	No	No	-7.34	0	1	0	0	1	0.55	0	0	1	3.44
Molecule 35	COc1c(SCc2ccc(cc2)O)c(O)cc2c1OCCCCO2	C18H20O5S	348.41	24	12	0.33	4	5	2	93.67	93.45	2.42	3.62	3.8	2.05	3.61	3.1	-4.39	0.0143	4.1e-05	Moderately soluble	-5.27	0.00187	5.37e-06	Moderately soluble	-4.96	0.00383	1.1e-05	Moderately soluble	High	No	Yes	Yes	No	Yes	Yes	No	-5.86	0	0	0	0	0	0.55	0	0	1	3.44
Molecule 36	O/N=C(\c1cocc1)/c1cnccn1	C9H7N3O2	189.17	14	11	0	2	5	1	48.17	71.51	1.29	0.78	1.3	-1.18	1.45	0.73	-1.95	2.1	0.0111	Very soluble	-1.86	2.6	0.0137	Very soluble	-2.9	0.236	0.00125	Soluble	High	No	No	Yes	No	No	No	No	-6.9	0	0	0	0	1	0.55	0	3	1	2.89
Molecule 37	COC(=O)C(=C(Cc1ccc2c(c1)cccc2)COC(=O)C)O	C18H18O5	314.33	23	10	0.22	7	5	1	86.23	72.83	2.82	3.55	2.93	2.27	3.11	2.94	-3.89	0.041	0.00013	Soluble	-4.76	0.00541	1.72e-05	Moderately soluble	-4.53	0.00921	2.93e-05	Moderately soluble	High	Yes	No	Yes	No	No	No	No	-5.7	0	0	0	0	0	0.55	0	3	1	2.91
Molecule 38	OCCC(N(C(=N)N)CC1CCCCC1)C	C12H25N3O	227.35	16	0	0.92	6	2	3	68.04	73.34	1.95	1.72	1.53	1.44	0.99	1.53	-1.94	2.63	0.0116	Very soluble	-2.88	0.302	0.00133	Soluble	-1.47	7.7	0.0339	Soluble	High	No	No	No	No	No	No	No	-6.47	0	0	0	0	0	0.55	0	2	1	2.86
Molecule 39	CC(CC[C@@H](C(=O)OC(C)(C)C)NC(=O)CCCCCCCCC(O)C)C	C22H43NO4	385.58	27	0	0.91	17	4	2	113.35	75.63	4.99	5.45	4.75	3.31	5.48	4.8	-4.54	0.0111	2.87e-05	Moderately soluble	-6.79	6.18e-05	1.6e-07	Poorly soluble	-5.49	0.00124	3.21e-06	Moderately soluble	High	No	Yes	Yes	Yes	No	Yes	Yes	-4.78	0	0	1	0	2	0.55	0	0	3	4.08
Molecule 40	O=C[CH]Cc1cc(Cl)ccc1C(=O)c1cccc(c1)C(=O)OCC(C=O)C	C21H18ClO5	385.82	27	12	0.24	10	5	0	100.95	77.51	0	3.44	3.51	2.78	5.68	3.08	-4.07	0.033	8.55e-05	Moderately soluble	-4.75	0.00688	1.78e-05	Moderately soluble	-6.65	8.66e-05	2.24e-07	Poorly soluble	High	Yes	Yes	No	Yes	No	No	Yes	-6.21	0	0	0	0	0	0.55	0	1	2	3.46
Molecule 41	OCCN(CCCn1c(CO)ncc1[C@@H](O)C)C	C12H23N3O3	257.33	18	5	0.75	8	5	3	68.64	81.75	2.12	-1.64	-0.73	-1.18	0.21	-0.24	-0.08	214	0.832	Very soluble	0.43	699	2.72	Highly soluble	-1.28	13.6	0.0528	Soluble	High	No	Yes	No	No	No	No	No	-9.03	0	1	0	0	0	0.55	0	0	1	3.34
Molecule 42	CNc1c(OC)c(C=O)ccc1S(=O)(=O)NC	C10H14N2O4S	258.29	17	6	0.3	5	5	2	63.52	92.88	1.63	0.86	1.35	-0.45	0.31	0.74	-1.91	3.15	0.0122	Very soluble	-2.39	1.04	0.00404	Soluble	-3.28	0.135	0.000524	Soluble	High	No	No	No	No	No	No	No	-7.26	0	0	0	0	0	0.55	0	1	0	2.53
Molecule 43	O=C(C(=O)Nc1cccc2c1cccc2)N1CCN(CC1)S(=O)(=O)C	C17H19N3O4S	361.42	25	10	0.29	5	5	1	102.97	95.17	2.36	1.3	1.01	0.22	0.36	1.05	-2.87	0.492	0.00136	Soluble	-2.9	0.456	0.00126	Soluble	-4.07	0.0308	8.53e-05	Moderately soluble	High	No	No	No	No	No	No	No	-7.58	0	0	0	0	0	0.55	0	1	1	2.6
Molecule 44	CCCN(C(=O)c1ccc(cc1)OC(C)(C)C)[C@@H](C(=O)O)O	C16H23NO5	309.36	22	6	0.5	8	5	2	82.65	87.07	2.76	2.27	2.12	1.38	1.55	2.02	-2.86	0.425	0.00137	Soluble	-3.74	0.0569	0.000184	Soluble	-2.66	0.674	0.00218	Soluble	High	No	No	No	No	No	No	No	-6.58	0	0	0	0	0	0.56	0	1	1	2.58
Molecule 45	CNCCCNC(=O)CCOCCCOC(=O)N[C]1CCCNC=CC1	C18H33N4O4	369.48	26	0	0.78	15	5	4	103.11	100.72	0	0.7	0.39	-0.07	1.27	0.46	-1.58	9.68	0.0262	Very soluble	-2.39	1.5	0.00405	Soluble	-4.28	0.0192	5.2e-05	Moderately soluble	High	No	Yes	No	No	No	No	No	-8.06	0	0	1	0	0	0.55	0	0	2	4.39
Molecule 46	N#C/C(=C\C1=C(O)C(=C(C1=CC)O)C(=O)C)/C(=O)N1CCN(CC1)c1cccc(c1)C(F)(F)F	C24H22F3N3O4	473.44	34	6	0.29	6	8	2	124.67	104.87	2.52	2.73	4.37	1.11	3.37	2.82	-4.23	0.0279	5.89e-05	Moderately soluble	-4.59	0.0123	2.59e-05	Moderately soluble	-3.97	0.0504	0.000106	Soluble	High	No	No	No	No	Yes	No	Yes	-7.25	0	0	0	0	0	0.56	0	2	1	4.08
Molecule 47	O=C(CNC(=O)C)N/N=C/c1ccccc1N(S(=O)(=O)C)C	C13H18N4O4S	326.37	22	6	0.31	8	5	2	83.5	116.32	1.75	-0.33	0.75	-0.26	-0.1	0.36	-1.33	15.3	0.0468	Very soluble	-1.65	7.28	0.0223	Very soluble	-3.29	0.165	0.000507	Soluble	High	No	No	No	No	No	No	No	-8.53	0	0	0	0	0	0.55	0	1	1	2.87
Molecule 48	CCNC(=O)[C@@H](c1ccccc1)NC(=O)N[C@H](C(=O)NOC)C	C15H22N4O4	322.36	23	6	0.4	11	4	4	83.14	108.56	1.91	0.57	-0.1	0.55	0.09	0.6	-1.66	6.98	0.0216	Very soluble	-2.42	1.22	0.00378	Soluble	-3.83	0.0475	0.000147	Soluble	High	No	No	No	No	No	No	No	-7.86	0	0	1	0	0	0.55	0	1	1	3.46
Molecule 49	NCCC(C(=O)N[C@H](C(=O)NC)Cc1ccccc1)N	C14H22N4O2	278.35	20	6	0.43	9	4	4	76.48	110.24	1.41	-1.06	-0.86	-0.07	0.41	-0.04	-0.53	82.9	0.298	Very soluble	-0.77	47.7	0.171	Very soluble	-3.38	0.117	0.00042	Soluble	High	No	No	No	No	No	No	No	-8.75	0	1	0	0	0	0.55	0	0	1	2.81
Molecule 50	CNC(=O)C[C@@H](C(c1c(Cl)cccc1Cl)OCc1cccc(c1C(=O)O)O)O	C19H19Cl2NO6	428.26	28	12	0.26	9	6	4	104.18	116.09	2.17	2.71	2.68	2.04	3.39	2.6	-3.93	0.0508	0.000119	Soluble	-4.8	0.00677	1.58e-05	Moderately soluble	-5.3	0.00214	4.99e-06	Moderately soluble	High	No	Yes	No	Yes	No	Yes	Yes	-6.99	0	0	0	0	0	0.56	0	0	2	3.67
Molecule 51	NCCCNC(=O)CCCCCCCCNC(=O)CN(CCC(=O)NC)C	C19H39N5O3	385.54	27	0	0.84	20	5	4	108.06	116.56	2.73	0.22	0.37	0.15	2.13	1.12	-1.05	34.4	0.0893	Very soluble	-2.23	2.28	0.00593	Soluble	-5.24	0.00224	5.82e-06	Moderately soluble	High	No	Yes	No	No	No	No	No	-8.5	0	0	1	0	1	0.55	0	0	2	3.12
Molecule 52	CCC(Oc1cc(F)ccc1CN(CC(C)C)C)C	C16H26FNO	267.38	19	6	0.62	7	3	0	79.21	12.47	3.85	4.49	4.36	3.84	4.17	4.14	-4.1	0.0213	7.98e-05	Moderately soluble	-4.47	0.00901	3.37e-05	Moderately soluble	-5	0.00266	9.95e-06	Moderately soluble	High	Yes	No	No	No	No	Yes	No	-4.74	0	0	0	0	0	0.55	0	0	1	2.78
Molecule 53	OC(CCC[CH]CCC1=CCCC1)F	C12H20FO	199.29	14	0	0.83	7	2	1	57.37	20.23	0	3.9	3.96	3.01	3.73	2.92	-3.07	0.169	0.00085	Soluble	-4.02	0.0189	9.48e-05	Moderately soluble	-3.21	0.124	0.000624	Soluble	High	Yes	No	No	No	No	No	No	-4.75	0	0	0	0	2	0.55	0	1	2	3.44
Molecule 54	CC(CCc1ccc(cc1)CN(CC(=O)c1ccccc1)C)C	C21H27NO	309.45	23	12	0.38	8	2	0	97.83	20.31	3.82	5.3	4.44	4	5.16	4.55	-4.96	0.00343	1.11e-05	Moderately soluble	-5.48	0.00103	3.33e-06	Moderately soluble	-7.01	3e-05	9.71e-08	Poorly soluble	High	Yes	No	Yes	Yes	No	Yes	No	-4.42	0	0	0	0	1	0.55	0	0	2	2.04
Molecule 55	CCCOc1ccc2c(c1)C=NC2	C11H13NO	175.23	13	6	0.36	3	2	0	57.38	21.59	2.49	1.9	1.88	1.64	3.49	2.28	-2.27	0.948	0.00541	Soluble	-1.98	1.85	0.0106	Very soluble	-3.7	0.0353	0.000201	Soluble	High	Yes	No	Yes	No	No	No	No	-6.02	0	0	0	0	1	0.55	0	0	1	2.53
Molecule 56	O=CN(C/C=C\Cn1c2ccccc2c2c1cccc2)C	C18H18N2O	278.35	21	13	0.17	5	1	0	87.75	25.24	2.87	4.11	3.44	3.2	3.09	3.34	-4.28	0.0145	5.21e-05	Moderately soluble	-4.35	0.0125	4.51e-05	Moderately soluble	-4.7	0.00552	1.98e-05	Moderately soluble	High	Yes	No	Yes	Yes	Yes	Yes	No	-5.08	0	0	0	0	0	0.55	0	2	1	2.28
Molecule 57	COc1cc(CCC=C2CCCCC2)ccc1O	C16H22O2	246.34	18	6	0.5	4	2	1	75.79	29.46	3.43	3.98	4.22	3.23	4.33	3.84	-3.86	0.0342	0.000139	Soluble	-4.3	0.0123	5.01e-05	Moderately soluble	-4.46	0.0085	3.45e-05	Moderately soluble	High	Yes	No	Yes	No	No	Yes	No	-4.98	0	0	0	0	0	0.55	0	1	2	2.31
Molecule 58	O=CN(Cc1ccc(cc1C)Oc1ccccc1)C	C16H17NO2	255.31	19	12	0.19	5	2	0	75.99	29.54	2.9	3.12	3.22	3.31	3.2	3.15	-3.53	0.0761	0.000298	Soluble	-3.41	0.0995	0.00039	Soluble	-5.12	0.00192	7.53e-06	Moderately soluble	High	Yes	No	Yes	Yes	Yes	Yes	No	-5.64	0	0	0	0	0	0.55	0	1	0	1.73
Molecule 59	CCc1cc(OC)ccc1CN(CC(=O)CCc1ccccc1)C	C21H27NO2	325.44	24	12	0.38	9	3	0	99.29	29.54	3.64	4.17	3.74	3.39	5.01	3.99	-4.26	0.0178	5.48e-05	Moderately soluble	-4.5	0.0103	3.17e-05	Moderately soluble	-7.1	2.58e-05	7.93e-08	Poorly soluble	High	Yes	No	Yes	Yes	No	Yes	Yes	-5.32	0	0	0	0	0	0.55	0	0	2	2.32
Molecule 60	COc1cc(c(cc1C)Br)C(=O)N(C)C	C11H14BrNO2	272.14	15	6	0.36	3	2	0	63.5	29.54	2.77	2.41	2.47	2.51	2.49	2.53	-3.14	0.196	0.000719	Soluble	-2.67	0.579	0.00213	Soluble	-3.82	0.0408	0.00015	Soluble	High	Yes	No	Yes	No	No	No	No	-6.25	0	0	0	0	0	0.55	0	0	0	1.78
Molecule 61	Clc1ccc(c(c1)Cl)OCCCN(C(=O)c1ccccc1)C	C17H17Cl2NO2	338.23	22	12	0.24	7	2	0	89.99	29.54	3.45	4.66	4.53	4.15	4.46	4.25	-4.81	0.00519	1.53e-05	Moderately soluble	-5.01	0.00333	9.84e-06	Moderately soluble	-6.74	6.13e-05	1.81e-07	Poorly soluble	High	Yes	No	Yes	Yes	Yes	Yes	No	-5.05	0	0	0	0	0	0.55	0	0	1	2.02
Molecule 62	Cn1nc(nc1c1ccccc1)Cc1ccccc1	C16H15N3	249.31	19	17	0.12	3	2	0	76.17	30.71	2.7	3.62	3.07	3.34	3.34	3.22	-4.13	0.0185	7.41e-05	Moderately soluble	-3.95	0.0278	0.000112	Soluble	-5.87	0.000337	1.35e-06	Moderately soluble	High	Yes	No	Yes	Yes	Yes	Yes	No	-5.25	0	0	0	0	0	0.55	0	0	2	2.64
Molecule 63	Cn1nc(nc1C)CCC1CCCC1	C11H19N3	193.29	14	5	0.82	3	2	0	57.94	30.71	2.57	3.25	2.25	2.25	2.44	2.55	-3.15	0.136	0.000704	Soluble	-3.57	0.0522	0.00027	Soluble	-2.78	0.319	0.00165	Soluble	High	Yes	No	No	No	No	No	No	-5.17	0	0	0	0	1	0.55	0	0	1	2.73
Molecule 64	CN(Cc1ccc(cc1)OCC(C)C)CC1CCCCC1O	C19H31NO2	305.45	22	6	0.68	7	3	1	92.72	32.7	3.94	4.09	3.55	2.89	3.57	3.61	-4.05	0.0272	8.91e-05	Moderately soluble	-4.48	0.0101	3.3e-05	Moderately soluble	-4.52	0.00931	3.05e-05	Moderately soluble	High	Yes	No	No	No	No	Yes	No	-5.26	0	0	0	0	0	0.55	0	0	1	3.01
Molecule 65	CNC1CCC(C1)NCCOCc1ccccc1	C15H24N2O	248.36	18	6	0.6	7	3	2	74.44	33.29	2.87	1.69	1.78	1.66	2.47	2.09	-2.23	1.47	0.0059	Soluble	-2	2.46	0.00991	Soluble	-4.78	0.00417	1.68e-05	Moderately soluble	High	Yes	Yes	No	No	No	Yes	No	-6.62	0	0	0	0	0	0.55	0	0	1	2.87
Molecule 66	C1[CH]OC2[C@H](C1)C=NN2	C6H9N2O	125.15	9	0	0.83	0	2	1	40.48	33.62	0	0.36	-0.56	0.41	1.2	0.28	-0.84	18	0.144	Very soluble	-0.63	29.3	0.234	Very soluble	-0.64	28.5	0.228	Soluble	High	No	No	No	No	No	No	No	-6.81	0	3	0	0	1	0.55	0	0	1	3.86
Molecule 67	Cc1c(/C=C(/C(=O)C)\CCC#C)ccc(c1OC)OC	C17H20O3	272.34	20	6	0.35	6	3	0	81.69	35.53	3.24	3.18	3.37	2.82	4.57	3.44	-3.36	0.119	0.000439	Soluble	-3.6	0.0688	0.000253	Soluble	-4.36	0.0119	4.39e-05	Moderately soluble	High	Yes	No	Yes	Yes	No	No	Yes	-5.7	0	0	0	0	0	0.55	0	2	0	3.04
Molecule 68	OCn1cccc1C1NC=CC(=C1)Cl	C10H11ClN2O	210.66	14	5	0.2	2	1	2	59.5	37.19	2.12	1.31	0.86	0.86	0.84	1.2	-2.1	1.66	0.00788	Soluble	-1.69	4.29	0.0203	Very soluble	-1.73	3.95	0.0187	Soluble	High	Yes	No	Yes	No	No	No	No	-6.65	0	0	0	0	0	0.55	0	0	1	3.61
Molecule 69	CCC(=O)CN(CC(=O)c1ccccc1)C	C13H17NO2	219.28	16	6	0.38	6	3	0	63.77	37.38	2.21	1.9	1.78	1.35	2.31	1.91	-2.28	1.16	0.00527	Soluble	-2.31	1.08	0.00492	Soluble	-3.63	0.0518	0.000236	Soluble	High	Yes	No	No	No	No	No	No	-6.29	0	0	0	0	0	0.55	0	0	1	1.34
Molecule 70	Cc1cc(/C=C/C(=O)N(C)C)cc(c1)O	C12H15NO2	205.25	15	6	0.25	3	2	1	61.04	40.54	2.27	1.82	1.69	1.75	1.85	1.88	-2.36	0.902	0.00439	Soluble	-2.29	1.05	0.00512	Soluble	-2.37	0.886	0.00432	Soluble	High	Yes	No	Yes	No	No	No	No	-6.26	0	0	0	0	0	0.55	0	1	1	2.16
Molecule 71	O=CN(CC=C1C=Cc2c(C=C1C)c(OC)ccn2)C	C16H18N2O2	270.33	20	6	0.25	4	3	0	80.65	42.43	2.78	1.63	2.32	1.8	2.41	2.19	-2.5	0.853	0.00316	Soluble	-2.13	1.99	0.00735	Soluble	-3.32	0.13	0.000481	Soluble	High	Yes	No	Yes	Yes	No	No	No	-6.79	0	0	0	0	0	0.55	0	1	0	3.51
Molecule 72	[CH]CCC(C(=O)C=C/C=C(/CC[C@H](OC(=O)C)C)\C)C	C17H26O3	278.39	20	0	0.65	10	3	0	82.26	43.37	0	4.55	3.92	3.26	4.58	3.26	-3.77	0.047	0.000169	Soluble	-5.18	0.00182	6.55e-06	Moderately soluble	-3.35	0.125	0.00045	Soluble	High	Yes	Yes	No	No	No	No	No	-4.77	0	0	0	0	0	0.55	0	2	2	3.85
Molecule 73	COC(=O)/C=C/C=C/C=C/C=Cc1ccccc1O	C16H16O3	256.3	19	6	0.06	6	3	1	76.88	46.53	3.09	3.78	3.14	2.96	3.53	3.3	-3.65	0.0576	0.000225	Soluble	-4.45	0.00908	3.54e-05	Moderately soluble	-2.26	1.4	0.00547	Soluble	High	Yes	No	No	Yes	Yes	No	No	-5.18	0	0	0	0	0	0.55	0	2	1	3.12
Molecule 74	OC/C=C\C=C\[C@H](CC(=O)N)N	C8H14N2O2	170.21	12	0	0.38	5	3	3	46.4	89.34	3.09	3.78	-0.71	2.96	3.53	3.3	-3.65	0.0576	0.000225	Soluble	-4.45	0.00908	3.54e-05	Moderately soluble	-2.26	1.4	0.00547	Soluble	High	Yes	No	No	Yes	Yes	No	No	-5.18	0	0	0	0	0	0.55	0	2	1	3.12
Molecule 75	OCCC[C@@H](CCCC(OC)C)O	C10H22O3	190.28	13	0	1	8	3	2	53.59	49.69	2.54	0.99	1.32	1.03	1.75	1.53	-1.12	14.6	0.0767	Very soluble	-1.62	4.54	0.0239	Very soluble	-1.77	3.21	0.0169	Soluble	High	Yes	No	No	No	No	No	No	-6.76	0	0	0	0	1	0.55	0	0	2	3
Molecule 76	OCC/C(=N/c1ccccc1OCC)/OCC	C13H19NO3	237.29	17	6	0.46	7	4	1	68.42	51.05	2.27	1.91	2.53	1.93	2.92	2.31	-2.31	1.15	0.00486	Soluble	-2.61	0.589	0.00248	Soluble	-3.8	0.0379	0.00016	Soluble	High	Yes	No	Yes	No	No	No	No	-6.39	0	0	0	0	0	0.55	0	2	1	3.21
Molecule 77	OCc1cccc(n1)CCC(=O)N(CC(C)C)C	C14H22N2O2	250.34	18	6	0.57	7	3	1	72.08	53.43	2.66	1.06	1.47	0.86	2.36	1.68	-1.84	3.58	0.0143	Very soluble	-1.77	4.22	0.0169	Very soluble	-3.57	0.0674	0.000269	Soluble	High	Yes	No	No	No	No	No	No	-7.07	0	0	0	0	0	0.55	0	0	0	2.17
Molecule 78	CCC/C=C/[C@H](C(=O)OCC)CC(=O)NCc1ccc(cc1)C	C19H27NO3	317.42	23	6	0.47	11	3	1	93.06	55.4	3.64	3.58	3.39	3.12	4.54	3.65	-3.53	0.0936	0.000295	Soluble	-4.43	0.0118	3.72e-05	Moderately soluble	-5.39	0.00129	4.06e-06	Moderately soluble	High	Yes	No	Yes	Yes	No	No	Yes	-5.69	0	0	1	0	0	0.55	0	1	2	3.36
Molecule 79	NC(C(Nc1ccccc1)COCc1ccccc1Cl)Oc1ccccc1	C22H23ClN2O2	382.88	27	18	0.18	9	3	2	109.47	56.51	3.41	4.84	4.36	3.76	4.19	4.11	-5.16	0.00263	6.88e-06	Moderately soluble	-5.76	0.000665	1.74e-06	Moderately soluble	-8.06	3.31e-06	8.65e-09	Poorly soluble	High	Yes	Yes	No	Yes	Yes	Yes	Yes	-5.2	0	0	0	0	0	0.55	0	1	3	3.57
Molecule 80	OC/N=C(/NNc1ccccc1)\S	C8H11N3OS	197.26	13	6	0.12	4	2	3	56.13	95.45	1.44	1.52	0.65	1.42	0.46	1.1	-2.1	1.57	0.00798	Soluble	-3.13	0.145	0.000736	Soluble	-2.54	0.57	0.00289	Soluble	High	No	No	No	No	No	No	No	-6.42	0	0	0	0	1	0.55	0	3	1	3.07
Molecule 81	CC/C=C/[C@H]([C@](C(O)(C)C)(OC(=O)CCC)C)/N=C\CNCC1CCCCC1	C23H42N2O3	394.59	28	0	0.83	13	5	2	119.1	70.92	4.23	4.22	4.43	2.63	5.42	4.19	-4.09	0.0323	8.18e-05	Moderately soluble	-5.42	0.0015	3.81e-06	Moderately soluble	-4.7	0.00791	2e-05	Moderately soluble	High	Yes	Yes	No	No	No	Yes	No	-5.71	0	0	1	0	0	0.55	0	2	3	5.24
Molecule 82	COC(=O)[C@H]1O[C](CCN1c1ccc(cn1)Cl)CCN1CCCCC1=O	C18H23ClN3O4	380.85	26	6	0.61	6	5	0	103.4	71.97	0	2.31	1.35	1.72	2.06	1.49	-3.43	0.141	0.00037	Soluble	-3.46	0.132	0.000347	Soluble	-3.8	0.0601	0.000158	Soluble	High	No	Yes	No	No	No	No	No	-6.98	0	0	0	0	0	0.55	0	0	1	3.95
Molecule 83	Fc1ccc(cc1)CCCCN1CCC(CC1)N([C@@H](C(=O)NCc1ccccc1)C(=O)N)C	C26H35FN4O2	454.58	33	12	0.46	12	5	2	131.85	78.67	3.8	3.61	2.6	2.4	3.63	3.21	-4.41	0.0177	3.89e-05	Moderately soluble	-4.95	0.00511	1.12e-05	Moderately soluble	-6.94	5.17e-05	1.14e-07	Poorly soluble	High	No	Yes	No	No	No	Yes	Yes	-6.51	0	1	1	0	0	0.55	0	1	3	3.5
Molecule 84	CCCN(C(=O)[C@@H](Cc1ccc(cc1)O)NC(=O)OCc1ccccc1C)C	C22H28N2O4	384.47	28	12	0.36	11	4	2	108.91	78.87	3.42	3.86	3.25	2.66	3.44	3.33	-4.25	0.0218	5.67e-05	Moderately soluble	-5.21	0.00235	6.12e-06	Moderately soluble	-6.13	0.000285	7.41e-07	Poorly soluble	High	Yes	Yes	No	Yes	Yes	Yes	No	-5.9	0	0	1	0	0	0.55	0	0	3	3.52
Molecule 85	O=C(C(C)C)NC=CC(=O)C(=O)NCC1=C(C)C=C(NC1)C	C16H23N3O3	305.37	22	0	0.44	8	3	3	88.41	87.3	2.59	0.99	0.4	-0.03	1.78	1.15	-1.83	4.53	0.0148	Very soluble	-2.41	1.18	0.00387	Soluble	-3.07	0.26	0.000851	Soluble	High	No	Yes	No	Yes	No	No	No	-7.46	0	0	0	0	0	0.55	0	2	1	4.13
Molecule 86	O=S(=O)(N1CCN(CC1)S(=O)(=O)C)C=Cc1cccnc1	C12H17N3O4S2	331.41	21	6	0.42	4	7	0	87.8	104.41	1.57	-0.51	1.25	-1.22	-0.85	0.05	-1.52	9.99	0.0301	Very soluble	-1.21	20.2	0.061	Very soluble	-2.11	2.59	0.00782	Soluble	High	No	No	No	No	No	No	No	-8.68	0	0	0	0	0	0.55	0	0	0	3.13
Molecule 87	OC/C=C\C=C\[C@H](CC(=O)N)N	C8H14N2O2	170.21	12	0	0.38	5	3	3	46.4	89.34	1.57	-0.51	-0.71	-1.22	-0.85	0.05	-1.52	9.99	0.0301	Very soluble	-1.21	20.2	0.061	Very soluble	-2.11	2.59	0.00782	Soluble	High	No	No	No	No	No	No	No	-8.68	0	0	0	0	0	0.55	0	0	0	3.13
Molecule 88	Oc1ccc(c(c1)O)Cc1ccc(c(c1)S(=O)(=O)C)O	C14H14O5S	294.32	20	12	0.14	3	5	3	75.06	103.21	1.72	2.57	2.88	1.58	1.7	2.09	-3.53	0.0869	0.000295	Soluble	-4.39	0.0121	4.12e-05	Moderately soluble	-3.9	0.0371	0.000126	Soluble	High	No	No	Yes	No	No	No	Yes	-6.27	0	0	0	0	0	0.55	0	0	0	2.56
Molecule 89	O=CN(C(=O)[C@@H](NC(=O)C)C)CCCCNC(=O)C	C12H21N3O4	271.31	19	0	0.67	11	4	2	69.49	95.58	1.71	-0.71	-0.59	-0.5	0.25	0.03	-0.35	122	0.448	Very soluble	-0.82	40.9	0.151	Very soluble	-1.95	3.08	0.0114	Soluble	High	No	No	No	No	No	No	No	-8.46	0	1	1	0	0	0.55	0	1	1	2.38
Molecule 90	CCc1cc(ccc1CN(CC(=O)O)C)C(=O)N[C@H](CCC(C(=O)O)C)C	C20H30N2O5	378.46	27	6	0.55	12	6	3	103.88	106.94	2.71	0.36	2.23	1.98	2.75	2.01	-1.79	6.2	0.0164	Very soluble	-2.17	2.56	0.00675	Soluble	-4.09	0.0307	8.11e-05	Moderately soluble	High	No	Yes	No	No	No	No	No	-8.35	0	0	1	0	0	0.56	0	0	2	3.31
Molecule 91	N[S]1CC2=CN(C(=O)C[C@@H]12)I	C6H8IN2OS	283.11	11	0	0.5	0	2	1	57.58	71.63	0	-0.59	0.6	0.17	-0.62	-0.09	-1.22	16.9	0.0598	Very soluble	-0.44	102	0.36	Very soluble	-0.99	29.1	0.103	Soluble	High	No	No	No	No	No	No	No	-8.45	0	1	0	0	0	0.55	0	2	0	4
Molecule 92	N/C=C(/COC(O)O)\C=O	C5H9NO4	147.13	10	0	0.4	4	4	3	31.99	92.78	0.39	-1.61	-1.69	-1.77	-1.37	-1.21	0.53	494	3.36	Highly soluble	0.17	218	1.48	Highly soluble	1.42	3840	26.1	Soluble	High	No	No	No	No	No	No	No	-8.34	0	4	0	0	1	0.55	0	3	1	2.3
Molecule 93	CS/C(=C\C=C)/c1ccc(cc1)C1=C(C=N1)C	C15H15NS	241.35	17	6	0.13	4	1	0	82.67	37.66	3.12	3.41	4.01	3.12	4.99	3.73	-3.48	0.0796	0.00033	Soluble	-3.88	0.0318	0.000132	Soluble	-4.44	0.00878	3.64e-05	Moderately soluble	High	Yes	No	Yes	Yes	Yes	No	No	-5.35	0	0	0	0	0	0.55	0	1	1	3.26
Molecule 94	NS/C(=C/C=C/C1=C[C@H](C)[CH]N=C1C)/CCl	C12H16ClN2S	255.79	16	0	0.42	4	2	1	77.31	63.68	0	1.68	2.8	1.93	3.34	1.95	-2.22	1.54	0.00602	Soluble	-2.63	0.597	0.00233	Soluble	-2.55	0.716	0.0028	Soluble	High	Yes	No	No	No	No	No	No	-6.67	0	0	0	0	0	0.55	0	3	0	4.44
Molecule 95	Brc1ccc(o1)/C=C/OC=O	C7H5BrO3	217.02	11	5	0	3	3	0	42.98	39.44	1.95	2.24	2.08	0.78	2.08	1.83	-2.74	0.399	0.00184	Soluble	-2.7	0.429	0.00198	Soluble	-2.25	1.22	0.00564	Soluble	High	Yes	No	Yes	Yes	No	No	No	-6.03	0	1	0	0	0	0.55	0	2	1	2.78
Molecule 96	N/C=C(/COC(O)O)\C=O	C5H9NO4	147.13	10	0	0.4	4	4	3	31.99	92.78	0.39	-1.61	-1.69	-1.77	-1.37	-1.21	0.53	494	3.36	Highly soluble	0.17	218	1.48	Highly soluble	1.42	3840	26.1	Soluble	High	No	No	No	No	No	No	No	-8.34	0	4	0	0	1	0.55	0	3	1	2.3
